# Supplementary material for: MALDI-IMS combined with shotgun proteomics identify and localize new factors in male infertility
Source: Life Sci Alliance. 2021 Jan 6;4(3):e202000672. doi: 10.26508/lsa.202000672 (PMC7812314; doi:10.26508/lsa.202000672)
Supplement: Supplementary file 1 [file LSA-2020-00672TableS1.xlsx]

## Sheet: Volcano_Plot_Data
Uniprot	Protein Names	Symbol	LFQ.intensity.AROM_Rep1	LFQ.intensity.AROM_Rep2	LFQ.intensity.AROM_Rep3	LFQ.intensity.WT_Rep1	LFQ.intensity.WT_Rep2	LFQ.intensity.WT_Rep3	logFC	t.ord	t.mod	p.ord	p.mod	q.ord	q.mod	df.r	df.0	s2.0	s2	s2.post	categ_Ord	categ_Mod	NegLogPvalMod	NegLogPvalOrd
A1EGX6	Fibrous sheath CABYR-binding protein	Fscb	23506000	8173800	10782000	88913000	31211000	28230000	-1.74698	-2.50023	-3.04488	0.0667505	0.0208923	0.0958055	0.0433263	4	2.40262	0.0966032	0.732335	0.493773	Not Significant	Not Significant	1.68001	1.17555
A2A432	Cullin-4B	Cul4b	46536000	55022000	47005000	52759000	62479000	51475000	-0.165163	-1.40392	-0.91177	0.233018	0.394922	0.215147	0.293559	4	2.40262	0.0966032	0.0207603	0.0492208	Not Significant	Not Significant	0.403489	0.632611
A2A5R2	Brefeldin A-inhibited guanine nucleotide-exchange protein 2	Arfgef2	9379000	0	11095000	9968200	0	0	-0.330182	-1.19162	-1.22938	0.299278	0.262186	0.253391	0.225663	4	2.40262	0.0966032	0.115165	0.1082	Not Significant	Not Significant	0.581391	0.523925
A2A6C4	Signal peptide peptidase-like 2C	Sppl2c	8456400	0	0	18815000	12158000	0	-0.130775	-0.15515	-0.191156	0.884217	0.854322	0.477825	0.46128	4	2.40262	0.0966032	1.0657	0.702043	Not Significant	Not Significant	0.0683784	0.0534411
A2A8Z1	Oxysterol-binding protein-related protein 9	Osbpl9	17290000	19936000	12288000	15892000	20646000	14929000	-0.0699055	-0.277558	-0.276766	0.795107	0.79068	0.45497	0.444311	4	2.40262	0.0966032	0.0951497	0.0956952	Not Significant	Not Significant	0.101999	0.0995747
A2A9I7	Doublesex- and mab-3-related transcription factor B1	Dmrtb1	28628000	11961000	0	55392000	55875000	95153000	-2.47168	-3.21782	-3.94386	0.0323473	0.00666549	0.0668672	0.0244825	4	2.40262	0.0966032	0.885013	0.589158	Significant	Significant	2.17617	1.49016
A2A9R3		Mageb4	7780300	8401700	9145000	11009000	7553000	5047300	0.170106	0.512745	0.558016	0.635146	0.595794	0.401151	0.378342	4	2.40262	0.0966032	0.165092	0.139391	Not Significant	Not Significant	0.224904	0.197126
A2ADY9	Protein DDI1 homolog 2	Ddi2	9414900	13126000	18555000	3644600	5075200	5234300	1.52194	4.63569	5.0312	0.00976546	0.00196706	0.0420897	0.0148552	4	2.40262	0.0966032	0.16168	0.13726	Not Significant	Not Significant	2.70618	2.01031
A2AGT5	Cytoskeleton-associated protein 5	Ckap5	200270000	211130000	204710000	232380000	273030000	190830000	-0.161391	-1.06845	-0.823362	0.345511	0.439887	0.279821	0.316948	4	2.40262	0.0966032	0.0342251	0.0576328	Not Significant	Not Significant	0.356658	0.461539
A2AKQ8	Tetratricopeptide repeat protein 30A2;Tetratricopeptide repeat protein 30B;Tetratricopeptide repeat protein 30A1	Ttc30a2	13079000	0	0	23088000	19534000	14800000	-1.2943	-2.33021	-2.77902	0.0802341	0.0299423	0.108467	0.0544853	4	2.40262	0.0966032	0.462777	0.325368	Not Significant	Not Significant	1.52371	1.09564
A2AKX3	Probable helicase senataxin	Setx	8815300	0	0	7241600	0	0	0.770531	3.6691	3.38814	0.0214082	0.0133161	0.0559669	0.034265	4	2.40262	0.0966032	0.0661535	0.0775799	Not Significant	Not Significant	1.87562	1.66942
A2AN08	E3 ubiquitin-protein ligase UBR4	Ubr4	103580000	99202000	83255000	150890000	140170000	116540000	-0.508902	-3.46509	-2.62297	0.0256982	0.0371323	0.0604994	0.0633023	4	2.40262	0.0966032	0.0323541	0.0564639	Not Significant	Not Significant	1.43025	1.5901
A2ARZ3	Fibrous sheath-interacting protein 2	Fsip2	20385000	3941800	6167400	103290000	56519000	18447000	-2.58786	-2.54893	-3.16597	0.0633774	0.0177889	0.0929947	0.039874	4	2.40262	0.0966032	1.54617	1.00221	Not Significant	Significant	1.74985	1.19807
A2ATU0	Probable 2-oxoglutarate dehydrogenase E1 component DHKTD1, mitochondrial	Dhtkd1	0	5600700	5916800	0	8688900	0	-0.225503	-0.902954	-0.897483	0.41761	0.401947	0.312661	0.297435	4	2.40262	0.0966032	0.0935542	0.0946984	Not Significant	Not Significant	0.395831	0.379229
A2AU72	Armadillo repeat-containing protein 3	Armc3	9901600	0	8061900	15975000	25173000	16998000	-0.801971	-2.21835	-2.46536	0.0907782	0.0462656	0.116733	0.0722426	4	2.40262	0.0966032	0.196041	0.158726	Not Significant	Not Significant	1.33474	1.04202
A2AWA9	Rab GTPase-activating protein 1	Rabgap1	0	8283100	0	0	7198100	7197600	0.0738138	0.319775	0.307945	0.765144	0.767898	0.444766	0.437905	4	2.40262	0.0966032	0.079924	0.0861829	Not Significant	Not Significant	0.114696	0.116257
A2AX52	Collagen alpha-4(VI) chain	Col6a4	161090000	65225000	193830000	56159000	10051000	0	2.70571	2.96407	3.66592	0.041387	0.00936689	0.0740913	0.0286164	4	2.40262	0.0966032	1.24991	0.817124	Significant	Significant	2.0284	1.38314
A2BIM8	Major urinary protein 6;Major urinary proteins 11 and 8;Major urinary protein 1;Major urinary protein 17	Mup18	51919000	117470000	124770000	80787000	45669000	125220000	0.239984	0.409245	0.490889	0.703325	0.639878	0.425724	0.394554	4	2.40262	0.0966032	0.515808	0.358499	Not Significant	Not Significant	0.193903	0.152844
A2RSQ1	Beta-galactosidase-1-like protein 3	Glb1l3	22822000	14525000	26435000	28000000	37257000	29704000	-0.607394	-2.10396	-2.19985	0.103191	0.0673052	0.125525	0.0911768	4	2.40262	0.0966032	0.125014	0.114353	Not Significant	Not Significant	1.17195	0.986358
A3KGV1	Outer dense fiber protein 2	Odf2	680690000	239870000	540850000	1293500000	1034300000	726560000	-1.15346	-2.23221	-2.6394	0.0893916	0.0362962	0.116223	0.0626033	4	2.40262	0.0966032	0.400526	0.286477	Not Significant	Not Significant	1.44014	1.0487
A3KMP2	Tetratricopeptide repeat protein 38	Ttc38	11901000	19444000	18991000	9426400	13727000	14475000	0.410122	1.35866	1.4402	0.245824	0.196863	0.222336	0.186164	4	2.40262	0.0966032	0.136677	0.121639	Not Significant	Not Significant	0.705837	0.609376
A6H584	Collagen alpha-5(VI) chain	Col6a5	69899000	1827900000	1623300000	141600000	9810100	174600000	3.24668	1.59088	2.00345	0.186847	0.0889927	0.185986	0.108297	4	2.40262	0.0966032	6.24736	3.93926	Not Significant	Not Significant	1.05065	0.728514
A6H5Y3	Methionine synthase	Mtr	13658000	20059000	18342000	14896000	10302000	11940000	0.485165	2.1284	2.03877	0.100389	0.0846281	0.1239	0.105248	4	2.40262	0.0966032	0.0779409	0.084944	Not Significant	Not Significant	1.07249	0.998314
A6H5Z3	Exocyst complex component 6B	Exoc6b	0	9137000	4723000	0	8113200	7329500	-0.234156	-0.831721	-0.862614	0.452336	0.419483	0.328052	0.306751	4	2.40262	0.0966032	0.11889	0.110527	Not Significant	Not Significant	0.377286	0.344539
A6H630	Protein-glutamate O-methyltransferase	Armt1	403190000	169150000	231390000	734040000	578400000	498330000	-1.24831	-3.11368	-3.53667	0.0357444	0.0110168	0.0693989	0.0310185	4	2.40262	0.0966032	0.241096	0.186874	Not Significant	Not Significant	1.95794	1.44679
A6H6A9	Rab GTPase-activating protein 1-like	Rabgap1l	7397200	8246300	0	8708700	9852800	9758300	-0.297258	-3.83821	-1.77917	0.0184878	0.12241	0.0536629	0.134945	4	2.40262	0.0966032	0.00899705	0.0418717	Not Significant	Not Significant	0.912185	1.73311
A6H8H2	DENN domain-containing protein 4C	Dennd4c	0	0	7038400	0	4659800	0	-0.227503	-0.379469	-0.456173	0.723625	0.663333	0.43222	0.40166	4	2.40262	0.0966032	0.539155	0.373085	Not Significant	Not Significant	0.178269	0.140486
A6X935	Inter alpha-trypsin inhibitor, heavy chain 4	Itih4	134490000	455180000	368430000	23508000	31450000	82392000	2.84413	3.69209	4.52594	0.0209802	0.00339485	0.0558611	0.0183495	4	2.40262	0.0966032	0.890113	0.592344	Significant	Significant	2.46918	1.67819
A7RDN6	Renalase	Rnls	140530000	55950000	60010000	201560000	208410000	245520000	-1.48337	-3.40218	-3.92361	0.0272225	0.00683009	0.061795	0.024612	4	2.40262	0.0966032	0.285151	0.214398	Not Significant	Not Significant	2.16557	1.56507
B1AY13	Ubiquitin carboxyl-terminal hydrolase 24	Usp24	46714000	108350000	62105000	29356000	56063000	69231000	0.488023	0.946766	1.11912	0.397368	0.303309	0.304019	0.247487	4	2.40262	0.0966032	0.398554	0.285245	Not Significant	Not Significant	0.518115	0.400807
B1AZI6	THO complex subunit 2	Thoc2	0	4948500	8718200	0	4478000	0	0.224965	0.333983	0.405607	0.755168	0.69824	0.441488	0.413255	4	2.40262	0.0966032	0.680573	0.461435	Not Significant	Not Significant	0.155995	0.121956
B1AZP2	Disks large-associated protein 4	Dlgap4	14799000	0	18619000	19639000	0	0	0.446117	0.719963	0.86819	0.511372	0.416642	0.351773	0.305372	4	2.40262	0.0966032	0.575929	0.396059	Not Significant	Not Significant	0.380237	0.291263
B2RQC6	CAD protein;Glutamine-dependent carbamoyl-phosphate synthase;Aspartate carbamoyltransferase;Dihydroorotase	Cad	37879000	46132000	43631000	47244000	53785000	41407000	-0.154897	-1.12292	-0.815757	0.324314	0.443922	0.267558	0.319002	4	2.40262	0.0966032	0.0285418	0.0540822	Not Significant	Not Significant	0.352693	0.489035
B2RR83	Probable ATP-dependent RNA helicase YTHDC2	Ythdc2	14464000	19168000	0	16413000	10838000	13204000	0.0449432	0.128645	0.141827	0.903847	0.891575	0.48385	0.472143	4	2.40262	0.0966032	0.183077	0.150627	Not Significant	Not Significant	0.049842	0.0439049
B2RRE7	OTU domain-containing protein 4	Otud4	0	0	2277400	0	2887900	0	0.443619	0.466069	0.577458	0.665414	0.583354	0.412438	0.372638	4	2.40262	0.0966032	1.35897	0.885263	Not Significant	Not Significant	0.234068	0.176908
B2RXS4	Plexin-B2	Plxnb2	0	14034000	26961000	0	11572000	10455000	0.688922	1.81256	2.03667	0.144118	0.0848819	0.155817	0.1053	4	2.40262	0.0966032	0.216693	0.171629	Not Significant	Not Significant	1.07118	0.841283
B2RY50	Armadillo repeat-containing protein 4	Armc4	19700000	14231000	24743000	37383000	66764000	57217000	-1.45455	-4.26693	-4.67592	0.0129818	0.00287631	0.0475151	0.0171278	4	2.40262	0.0966032	0.174308	0.145149	Not Significant	Not Significant	2.54116	1.88666
B2RY56	RNA-binding protein 25	Rbm25	59111000	71178000	69564000	67775000	73908000	60720000	-0.0184855	-0.157082	-0.102039	0.882791	0.921847	0.477825	0.480701	4	2.40262	0.0966032	0.0207733	0.0492289	Not Significant	Not Significant	0.0353413	0.0541423
B7ZMP1	Probable Xaa-Pro aminopeptidase 3	Xpnpep3	0	0	5457200	0	7944000	6800200	-0.00649979	-0.0129105	-0.0152142	0.990317	0.988324	0.505901	0.496969	4	2.40262	0.0966032	0.380195	0.273775	Not Significant	Not Significant	0.00510047	0.00422555
B9EJ80		Pdzd8	0	0	8035800	0	8768000	0	0.0814482	0.222711	0.248156	0.834671	0.811783	0.465978	0.45031	4	2.40262	0.0966032	0.200619	0.161587	Not Significant	Not Significant	0.0905602	0.0784848
B9EJ86	Oxysterol-binding protein	Osbpl8	31813000	26743000	26233000	19140000	19217000	15660000	0.651367	4.94779	3.48196	0.00777345	0.0118089	0.0385947	0.0321954	4	2.40262	0.0966032	0.0259969	0.0524923	Not Significant	Not Significant	1.92779	2.10939
B9EJR8	Dynein assembly factor 5, axonemal	Dnaaf5	23088000	22697000	24859000	32035000	39812000	33222000	-0.567193	-5.40206	-3.21861	0.00568439	0.0165984	0.0349973	0.0381674	4	2.40262	0.0966032	0.0165361	0.0465817	Not Significant	Not Significant	1.77993	2.24532
B9EKI3	TATA element modulatory factor	Tmf1	0	0	5228100	0	5773500	0	0.232697	0.669754	0.737397	0.539692	0.487016	0.364653	0.334643	4	2.40262	0.0966032	0.181068	0.149372	Not Significant	Not Significant	0.312456	0.267854
C0HK80		Arxes2	8373100	10438000	7507300	6971700	0	9157700	0.297855	1.17991	1.17756	0.303415	0.280881	0.256102	0.235813	4	2.40262	0.0966032	0.0955881	0.095969	Not Significant	Not Significant	0.551478	0.517963
C0HKD9		Mfap1b	19471000	0	0	17569000	0	0	0.539432	0.60999	0.753334	0.574822	0.478028	0.378773	0.330944	4	2.40262	0.0966032	1.17306	0.769113	Not Significant	Not Significant	0.320547	0.240467
C0HKE9	Histone H2A type 1-H;Histone H2A.J;Histone H2A type 1-K;Histone H2A type 1-F;Histone H2A type 3	Hist1h2ap	152580000	12375000	1268800000	133100000	11020000	0	2.83914	1.17146	1.47723	0.306434	0.187034	0.257723	0.180568	4	2.40262	0.0966032	8.81075	5.54072	Not Significant	Not Significant	0.72808	0.513664
C0HKG6		Rnaset2b	36393000	32889000	64552000	24732000	0	20545000	1.80322	1.92078	2.37848	0.127157	0.052276	0.143031	0.077225	4	2.40262	0.0966032	1.322	0.862162	Not Significant	Not Significant	1.2817	0.89566
C8YR32	Lipoxygenase homology domain-containing protein 1	Loxhd1	178590000	119140000	35997000	118180000	0	60836000	1.3256	0.929027	1.16437	0.405462	0.28582	0.306875	0.238473	4	2.40262	0.0966032	3.05396	1.94419	Not Significant	Not Significant	0.543908	0.392049
D3YXK2	Scaffold attachment factor B1	Safb	142790000	80933000	82258000	162830000	134700000	93921000	-0.371904	-1.0449	-1.15707	0.355053	0.288582	0.284769	0.23991	4	2.40262	0.0966032	0.190021	0.154965	Not Significant	Not Significant	0.539731	0.449707
D3YZP9	Coiled-coil domain-containing protein 6	Ccdc6	5164700	0	0	4726400	0	0	-0.0523917	-0.132356	-0.149962	0.901094	0.885408	0.483149	0.470083	4	2.40262	0.0966032	0.235032	0.183086	Not Significant	Not Significant	0.0528564	0.0452301
D3Z4S3	Putative peptidyl-tRNA hydrolase PTRHD1	Ptrhd1	0	9635000	0	0	9517400	13378000	-0.266582	-0.602526	-0.696573	0.579315	0.510557	0.380361	0.343802	4	2.40262	0.0966032	0.293631	0.219695	Not Significant	Not Significant	0.291956	0.237085
D3Z690	Izumo sperm-egg fusion protein 4	Izumo4	38465000	16416000	32968000	66213000	73968000	70542000	-1.35093	-3.54832	-3.98846	0.0238344	0.00631824	0.0589199	0.0241001	4	2.40262	0.0966032	0.217425	0.172086	Not Significant	Not Significant	2.1994	1.6228
D3Z6Q9	Bridging integrator 2	Bin2	40564000	31975000	39910000	34509000	36182000	36761000	0.0578246	0.506984	0.321772	0.638838	0.757873	0.402524	0.435259	4	2.40262	0.0966032	0.0195131	0.0484416	Not Significant	Not Significant	0.120404	0.19461
D3Z7P3	Glutaminase kidney isoform, mitochondrial	Gls	18693000	20148000	25282000	14645000	13623000	13975000	0.590648	4.39226	3.13639	0.0117619	0.018498	0.0451661	0.0405084	4	2.40262	0.0966032	0.0271252	0.0531972	Not Significant	Not Significant	1.73287	1.92952
E9PV24	Fibrinogen alpha chain;Fibrinopeptide A;Fibrinogen alpha chain	Fga	282650000	360370000	535560000	111550000	87350000	165700000	1.6928	4.45127	5.00222	0.0112357	0.00202764	0.0445697	0.0150318	4	2.40262	0.0966032	0.216938	0.171781	Not Significant	Not Significant	2.69301	1.9494
E9PVA8		Gcn1	222170000	166170000	181950000	226940000	210190000	180250000	-0.118713	-0.752879	-0.595802	0.493407	0.571755	0.344169	0.367554	4	2.40262	0.0966032	0.0372937	0.0595499	Not Significant	Not Significant	0.24279	0.306794
E9PXT9		Fam170b	11284000	0	0	19881000	22605000	15914000	-1.12906	-4.62749	-4.55805	0.00982566	0.00327559	0.0420897	0.0182093	4	2.40262	0.0966032	0.0892967	0.0920385	Not Significant	Not Significant	2.48471	2.00764
E9PY46		Ift140	107580000	63730000	68207000	155890000	150740000	151590000	-0.97644	-4.1091	-4.00487	0.014743	0.00619559	0.0490078	0.0239339	4	2.40262	0.0966032	0.084701	0.0891674	Not Significant	Not Significant	2.20792	1.83141
E9Q0C6		Kiaa1210	303770000	240160000	216650000	427220000	354120000	253810000	-0.426875	-1.62425	-1.64525	0.179647	0.147903	0.180239	0.153873	4	2.40262	0.0966032	0.103607	0.100979	Not Significant	Not Significant	0.830024	0.74558
E9Q3L2		Pi4ka	8946800	10221000	11876000	10832000	8897000	0	0.00390235	0.0249088	0.0196346	0.981321	0.984933	0.503339	0.495881	4	2.40262	0.0966032	0.0368162	0.0592516	Not Significant	Not Significant	0.00659349	0.00818897
E9Q5C9		Nolc1	18050000	15721000	21009000	17411000	12877000	16600000	0.226573	1.25035	1.07188	0.279323	0.322506	0.241472	0.258281	4	2.40262	0.0966032	0.0492542	0.0670222	Not Significant	Not Significant	0.491462	0.553893
E9Q735	Ubiquitin conjugation factor E4 A	Ube4a	23670000	17048000	20124000	46673000	23168000	0	-0.149579	-0.23135	-0.280027	0.828395	0.788286	0.464478	0.443583	4	2.40262	0.0966032	0.627038	0.42799	Not Significant	Not Significant	0.103316	0.0817623
E9Q7G0		Numa1	76998000	55708000	72722000	44957000	36814000	21140000	1.05211	2.95538	3.27279	0.0417456	0.0154628	0.0742472	0.0370769	4	2.40262	0.0966032	0.190101	0.155016	Not Significant	Not Significant	1.81071	1.37939
E9Q9D5	Rab-like protein 2A	Rabl2	0	3408000	0	0	10919000	4289800	-0.48535	-0.563053	-0.694508	0.603462	0.511767	0.38983	0.344474	4	2.40262	0.0966032	1.11456	0.732566	Not Significant	Not Significant	0.290928	0.21935
F6ZDS4	Nucleoprotein TPR	Tpr	57781000	78282000	80184000	47926000	56973000	52198000	0.44917	2.66862	2.19522	0.055886	0.067749	0.086226	0.0915478	4	2.40262	0.0966032	0.042495	0.0627994	Not Significant	Not Significant	1.1691	1.2527
F7BJB9		Morc3	0	6560900	0	0	9172600	8860800	0.940687	1.46337	1.7704	0.217202	0.123941	0.205095	0.136077	4	2.40262	0.0966032	0.619831	0.423487	Not Significant	Not Significant	0.906785	0.663135
F8VQ03		Adam3	12075000	6133700	7966700	28268000	24931000	12887000	-1.31471	-2.9074	-3.3731	0.0437922	0.0135766	0.0757556	0.0346626	4	2.40262	0.0966032	0.306719	0.227872	Not Significant	Not Significant	1.86721	1.3586
G5E829	Plasma membrane calcium-transporting ATPase 1	Atp2b1	19451000	26342000	22878000	10138000	13649000	16453000	0.788084	3.29077	3.2174	0.0301937	0.0166248	0.0648629	0.0381674	4	2.40262	0.0966032	0.0860282	0.0899966	Not Significant	Not Significant	1.77924	1.52008
G5E870	E3 ubiquitin-protein ligase TRIP12	Trip12	63518000	46313000	71238000	74240000	68333000	42971000	-0.0189709	-0.0616321	-0.0657069	0.953812	0.949615	0.496681	0.487901	4	2.40262	0.0966032	0.14212	0.125039	Not Significant	Not Significant	0.0224523	0.020537
G5E8A8		Tekt5	51210000	21259000	30096000	123630000	111250000	57529000	-1.5313	-3.03085	-3.57334	0.0387481	0.0105185	0.0715487	0.0304011	4	2.40262	0.0966032	0.382898	0.275465	Not Significant	Not Significant	1.97804	1.41175
O08528	Hexokinase-2	Hk2	108110000	101460000	104300000	68227000	96780000	82542000	0.356585	2.40636	1.832	0.0738452	0.113571	0.102411	0.128533	4	2.40262	0.0966032	0.0329378	0.0568286	Not Significant	Not Significant	0.944734	1.13168
O08529	Calpain-2 catalytic subunit	Capn2	33377000	96714000	72051000	11244000	11618000	8646900	2.56194	5.37062	6.28175	0.00580493	0.000587452	0.0353325	0.00855313	4	2.40262	0.0966032	0.341336	0.249498	Significant	Significant	3.23103	2.2362
O08539	Myc box-dependent-interacting protein 1	Bin1	22494000	43307000	12774000	12410000	9593900	10698000	1.09611	2.10719	2.49365	0.102816	0.0444671	0.125346	0.0705664	4	2.40262	0.0966032	0.405872	0.289817	Not Significant	Not Significant	1.35196	0.98794
O08547	Vesicle-trafficking protein SEC22b	Sec22b	200510000	187400000	183550000	221230000	221750000	205130000	-0.181684	-3.40667	-1.12797	0.0271104	0.299821	0.0617079	0.24584	4	2.40262	0.0966032	0.00426643	0.0389163	Not Significant	Not Significant	0.523137	1.56686
O08553	Dihydropyrimidinase-related protein 2	Dpysl2	220270000	414790000	326200000	184480000	184250000	216240000	0.673216	2.43077	2.50739	0.0719214	0.0436203	0.100677	0.0698703	4	2.40262	0.0966032	0.115057	0.108132	Not Significant	Not Significant	1.36031	1.14314
O08573	Galectin-9	Lgals9	9878000	11387000	8659800	3553000	0	0	0.916358	2.60698	2.87832	0.0596088	0.0261488	0.0897076	0.0502494	4	2.40262	0.0966032	0.18533	0.152035	Not Significant	Not Significant	1.58255	1.22469
O08579	Emerin	Emd	7343800	17962000	15902000	5724900	7205300	9029300	0.831205	1.86214	2.15592	0.136063	0.0716386	0.149669	0.094744	4	2.40262	0.0966032	0.298871	0.222969	Not Significant	Not Significant	1.14485	0.86626
O08582	GTP-binding protein 1	Gtpbp1	7533100	12325000	0	8834900	14793000	8102400	-0.505594	-0.929713	-1.10612	0.405147	0.308493	0.306827	0.250283	4	2.40262	0.0966032	0.443606	0.313391	Not Significant	Not Significant	0.510754	0.392388
O08583	THO complex subunit 4;Aly/REF export factor 2	Alyref	154650000	77610000	142880000	132430000	123240000	107060000	-0.00899828	-0.027524	-0.0298388	0.97936	0.977104	0.502647	0.494094	4	2.40262	0.0966032	0.16032	0.13641	Not Significant	Not Significant	0.0100591	0.00905751
O08585	Clathrin light chain A	Clta	120900000	115470000	174100000	68606000	95463000	67053000	0.822818	3.29848	3.27706	0.0299762	0.015377	0.0647342	0.037036	4	2.40262	0.0966032	0.093341	0.0945652	Not Significant	Not Significant	1.81313	1.52322
O08599	Syntaxin-binding protein 1	Stxbp1	0	21762000	14513000	0	16438000	17382000	0.113362	0.352984	0.380841	0.741916	0.71564	0.436855	0.419205	4	2.40262	0.0966032	0.154709	0.132905	Not Significant	Not Significant	0.145306	0.129645
O08638	Myosin-11	Myh11	1008800000	2279100000	1241900000	777790000	620320000	633120000	1.07486	2.92222	3.26027	0.0431477	0.0157174	0.0753853	0.0373002	4	2.40262	0.0966032	0.202939	0.163036	Not Significant	Not Significant	1.80362	1.36504
O08663	Methionine aminopeptidase 2	Metap2	84304000	53741000	73927000	83936000	87677000	72922000	-0.226706	-1.08534	-0.999711	0.338805	0.353723	0.27646	0.2748	4	2.40262	0.0966032	0.0654456	0.0771377	Not Significant	Not Significant	0.451337	0.470051
O08677	Kininogen-1;Kininogen-1 heavy chain;Bradykinin;Kininogen-1 light chain	Kng1	361280000	987130000	803880000	168740000	138580000	342050000	1.7212	2.89994	3.48268	0.0441204	0.011798	0.0760034	0.0321954	4	2.40262	0.0966032	0.528416	0.366376	Not Significant	Not Significant	1.92819	1.35536
O08709	Peroxiredoxin-6	Prdx6	950760000	1125400000	838400000	1150600000	1287000000	1474900000	-0.427905	-2.66056	-2.13082	0.0563574	0.0742406	0.0864775	0.0964489	4	2.40262	0.0966032	0.0388006	0.0604914	Not Significant	Not Significant	1.12936	1.24905
O08716	Fatty acid-binding protein 9	Fabp9	807950000	409000000	461250000	1131300000	1637900000	1360900000	-1.34942	-3.9732	-4.35001	0.0164945	0.00414063	0.0515741	0.0196491	4	2.40262	0.0966032	0.173023	0.144346	Not Significant	Not Significant	2.38293	1.78266
O08738	Caspase-6;Caspase-6 subunit p18;Caspase-6 subunit p11	Casp6	14079000	0	16230000	11554000	12300000	0	0.36052	0.930924	1.05011	0.40459	0.331678	0.306643	0.263667	4	2.40262	0.0966032	0.224968	0.176798	Not Significant	Not Significant	0.479283	0.392985
O08739	AMP deaminase 3	Ampd3	15058000	43131000	34153000	0	0	14605000	1.15759	2.35126	2.76246	0.0784072	0.03063	0.10647	0.0553714	4	2.40262	0.0966032	0.36358	0.263395	Not Significant	Not Significant	1.51385	1.10564
O08749	Dihydrolipoyl dehydrogenase, mitochondrial	Dld	294990000	237810000	344790000	308140000	379240000	370580000	-0.280096	-1.53908	-1.32246	0.198619	0.231292	0.193427	0.207288	4	2.40262	0.0966032	0.0496805	0.0672885	Not Significant	Not Significant	0.635839	0.701979
O08756	3-hydroxyacyl-CoA dehydrogenase type-2	Hsd17b10	267450000	224110000	327660000	192760000	107040000	113180000	1.02403	3.26749	3.50151	0.0308622	0.0115189	0.0655838	0.0317679	4	2.40262	0.0966032	0.14733	0.128295	Not Significant	Not Significant	1.93859	1.51057
O08759	Ubiquitin-protein ligase E3A	Ube3a	28118000	24994000	34688000	26516000	27283000	24459000	0.154094	1.05453	0.79566	0.351124	0.45471	0.282999	0.322472	4	2.40262	0.0966032	0.0320291	0.0562609	Not Significant	Not Significant	0.342266	0.45454
O08784	Treacle protein	Tcof1	0	6771700	0	0	4176400	0	0.663356	1.79059	2.0009	0.147849	0.0893159	0.157673	0.108399	4	2.40262	0.0966032	0.20587	0.164867	Not Significant	Not Significant	1.04907	0.83018
O08788	Dynactin subunit 1	Dctn1	128630000	108020000	108850000	144510000	139470000	131690000	-0.270468	-2.97217	-1.57899	0.0410561	0.162315	0.0737391	0.163543	4	2.40262	0.0966032	0.0124215	0.0440112	Not Significant	Not Significant	0.78964	1.38662
O08795	Glucosidase 2 subunit beta	Prkcsh	182070000	191670000	188080000	171550000	188080000	175090000	0.0721307	1.57867	0.451952	0.189554	0.666213	0.187576	0.402461	4	2.40262	0.0966032	0.00313146	0.0382072	Not Significant	Not Significant	0.176387	0.722267
O08807	Peroxiredoxin-4	Prdx4	617640000	462130000	562510000	862130000	921700000	745560000	-0.627861	-4.10757	-3.18896	0.0147614	0.017258	0.0490078	0.0388999	4	2.40262	0.0966032	0.0350468	0.0581462	Not Significant	Not Significant	1.76301	1.83087
O08808	Protein diaphanous homolog 1	Diaph1	0	9228400	9289500	0	6196100	5846200	0.182777	0.399547	0.464392	0.709905	0.657741	0.427957	0.400139	4	2.40262	0.0966032	0.313904	0.232361	Not Significant	Not Significant	0.181945	0.1488
O08810	116 kDa U5 small nuclear ribonucleoprotein component	Eftud2	238220000	188320000	191660000	207200000	205680000	184170000	0.0438555	0.359092	0.23966	0.737679	0.818084	0.435922	0.450777	4	2.40262	0.0966032	0.0223732	0.0502284	Not Significant	Not Significant	0.0872022	0.132132
O08811	TFIIH basal transcription factor complex helicase XPD subunit	Ercc2	6807400	0	0	7318700	9595500	7155500	0.144448	0.46584	0.497693	0.665565	0.635332	0.412438	0.39295	4	2.40262	0.0966032	0.144226	0.126356	Not Significant	Not Significant	0.196999	0.176809
O08914	Fatty-acid amide hydrolase 1	Faah	0	4571200	6574100	0	7534900	6750600	0.167487	0.390502	0.449085	0.71607	0.668174	0.430112	0.402781	4	2.40262	0.0966032	0.275936	0.208641	Not Significant	Not Significant	0.175111	0.145044
O08915	AH receptor-interacting protein	Aip	15622000	15932000	14109000	14971000	13435000	15413000	0.0599359	0.73853	0.356395	0.50118	0.732997	0.346258	0.426019	4	2.40262	0.0966032	0.00987937	0.042423	Not Significant	Not Significant	0.134898	0.300006
O08992	Syntenin-1	Sdcbp	0	18036000	0	0	7515500	7957700	0.569456	1.29922	1.49967	0.263694	0.181302	0.23261	0.176492	4	2.40262	0.0966032	0.288168	0.216282	Not Significant	Not Significant	0.741598	0.5789
O08997	Copper transport protein ATOX1	Atox1	232390000	376460000	273590000	236070000	365930000	439220000	-0.221555	-0.660812	-0.721119	0.544852	0.496315	0.366015	0.338585	4	2.40262	0.0966032	0.168617	0.141593	Not Significant	Not Significant	0.304243	0.263722
O09012	Peroxisomal targeting signal 1 receptor	Pex5	0	4530600	0	0	2933000	2654600	0.916613	1.78267	2.10653	0.149219	0.0768492	0.158294	0.09857	4	2.40262	0.0966032	0.39657	0.284006	Not Significant	Not Significant	1.11436	0.826177
O09035	Diazepam-binding inhibitor-like 5	Dbil5	176870000	55332000	128220000	266130000	622730000	512370000	-2.02681	-3.25651	-3.92854	0.0311835	0.00678955	0.0659303	0.0245476	4	2.40262	0.0966032	0.581049	0.399258	Significant	Significant	2.16816	1.50608
O09044	Synaptosomal-associated protein 23	Snap23	32666000	36782000	39402000	25578000	33636000	27874000	0.327076	2.3215	1.71039	0.0810032	0.134923	0.108758	0.144789	4	2.40262	0.0966032	0.029775	0.0548527	Not Significant	Not Significant	0.869914	1.0915
O09046	L-amino-acid oxidase	Il4i1	31351000	0	21131000	36058000	46288000	39575000	-1.26787	-1.9604	-2.37293	0.121499	0.0526861	0.138276	0.0776185	4	2.40262	0.0966032	0.627415	0.428225	Not Significant	Not Significant	1.2783	0.915426
O09061	Proteasome subunit beta type-1	Psmb1	243510000	225870000	306340000	245920000	291900000	254490000	-0.0388883	-0.255357	-0.197792	0.81104	0.84934	0.4585	0.459692	4	2.40262	0.0966032	0.0347883	0.0579847	Not Significant	Not Significant	0.0709186	0.0909576
O09106	Histone deacetylase 1	Hdac1	45729000	49451000	59650000	54253000	50238000	46153000	0.0335749	0.253954	0.179242	0.812051	0.863286	0.458913	0.464132	4	2.40262	0.0966032	0.0262188	0.0526309	Not Significant	Not Significant	0.0638451	0.0904166
O09111	NADH dehydrogenase [ubiquinone] 1 beta subcomplex subunit 11, mitochondrial	Ndufb11	10682000	0	0	11309000	0	0	-0.103935	-0.190202	-0.226418	0.858414	0.827933	0.47181	0.453101	4	2.40262	0.0966032	0.447906	0.316078	Not Significant	Not Significant	0.0820046	0.0663033
O09117	Synaptophysin-like protein 1	Sypl1	46087000	48586000	37882000	74856000	80147000	64035000	-0.726405	-4.99949	-3.75835	0.00749312	0.00835384	0.0382496	0.0273297	4	2.40262	0.0966032	0.0316663	0.0560342	Not Significant	Not Significant	2.07811	2.12534
O09130	NFATC2-interacting protein	Nfatc2ip	13346000	13640000	14651000	14434000	22991000	14592000	-0.286823	-1.27478	-1.21428	0.271402	0.267521	0.237371	0.228393	4	2.40262	0.0966032	0.0759357	0.0836913	Not Significant	Not Significant	0.572643	0.566387
O09131	Glutathione S-transferase omega-1	Gsto1	38256000	84558000	65092000	24043000	25110000	29976000	1.18014	3.36783	3.71561	0.0281002	0.00880651	0.0627599	0.0277436	4	2.40262	0.0966032	0.184187	0.151321	Not Significant	Not Significant	2.0552	1.55129
O09159	Lysosomal alpha-mannosidase	Man2b1	20759000	30782000	20466000	10601000	14398000	18292000	0.74259	2.48768	2.62815	0.0676522	0.0368667	0.0967617	0.0631828	4	2.40262	0.0966032	0.13366	0.119754	Not Significant	Not Significant	1.43337	1.16972
O09164	Extracellular superoxide dismutase [Cu-Zn]	Sod3	7192700	17212000	0	5743600	0	6969100	0.324096	0.627651	0.742076	0.564282	0.484366	0.374509	0.3341	4	2.40262	0.0966032	0.399948	0.286116	Not Significant	Not Significant	0.314827	0.248503
O09167	60S ribosomal protein L21	Rpl21	81201000	50110000	91241000	81569000	74028000	54781000	0.0555036	0.17557	0.188604	0.869161	0.85624	0.475097	0.461572	4	2.40262	0.0966032	0.14991	0.129906	Not Significant	Not Significant	0.0674043	0.0608997
O09172	Glutamate--cysteine ligase regulatory subunit	Gclm	40694000	31150000	34410000	43586000	56687000	47898000	-0.479991	-3.0384	-2.40723	0.0384624	0.0502015	0.0715315	0.075297	4	2.40262	0.0966032	0.037434	0.0596376	Not Significant	Not Significant	1.29928	1.41496
O09174	Alpha-methylacyl-CoA racemase	Amacr	11153000	13983000	18269000	36257000	50837000	50492000	-1.67656	-6.41814	-6.48691	0.00302903	0.000490161	0.0284036	0.0077663	4	2.40262	0.0966032	0.102356	0.100197	Not Significant	Not Significant	3.30966	2.5187
O35047	Homologous-pairing protein 2 homolog	Psmc3ip	3537900	0	0	4261300	0	0	-0.154037	-0.211297	-0.258099	0.842984	0.804428	0.467551	0.447987	4	2.40262	0.0966032	0.797176	0.534282	Not Significant	Not Significant	0.0945126	0.0741807
O35074	Prostacyclin synthase	Ptgis	0	66612000	45287000	20044000	18746000	24223000	0.637369	0.814273	0.999135	0.461186	0.353981	0.33169	0.2748	4	2.40262	0.0966032	0.919037	0.610414	Not Significant	Not Significant	0.45102	0.336124
O35083	1-acyl-sn-glycerol-3-phosphate acyltransferase alpha	Agpat1	0	18823000	15162000	14342000	26660000	21978000	-0.707702	-1.35696	-1.60636	0.246316	0.156208	0.222366	0.159176	4	2.40262	0.0966032	0.407995	0.291143	Not Significant	Not Significant	0.806296	0.608508
O35098	Dihydropyrimidinase-related protein 4	Dpysl4	57930000	71298000	56746000	54838000	65737000	69836000	-0.0343872	-0.231617	-0.176547	0.828202	0.865318	0.464478	0.464884	4	2.40262	0.0966032	0.033063	0.0569068	Not Significant	Not Significant	0.0628245	0.081864
O35114	Lysosome membrane protein 2	Scarb2	209150000	204490000	185640000	81118000	72326000	99506000	1.25518	8.68177	6.50554	0.000968834	0.000482273	0.0201541	0.00771697	4	2.40262	0.0966032	0.0313535	0.0558388	Not Significant	Not Significant	3.31671	3.01375
O35125	Leucine-rich repeat-containing protein 23	Lrrc23	25780000	22033000	27508000	34340000	54212000	42404000	-0.778978	-3.66142	-3.4015	0.0215533	0.0130891	0.0559669	0.0340091	4	2.40262	0.0966032	0.0678957	0.0786683	Not Significant	Not Significant	1.88309	1.66649
O35127	Protein C10	Grcc10	0	0	11006000	0	0	14408000	-0.507661	-1.06879	-1.24933	0.345375	0.255279	0.279821	0.221927	4	2.40262	0.0966032	0.338421	0.247677	Not Significant	Not Significant	0.592986	0.461709
O35129	Prohibitin-2	Phb2	231590000	240810000	209980000	198110000	192150000	151270000	0.341353	2.50328	1.80451	0.0665332	0.11809	0.0955772	0.131739	4	2.40262	0.0966032	0.0278921	0.0536763	Not Significant	Not Significant	0.927786	1.17696
O35143	ATPase inhibitor, mitochondrial	Atpif1	156760000	215710000	0	151270000	316510000	222570000	-1.41743	-1.17544	-1.46774	0.305006	0.189509	0.256875	0.181979	4	2.40262	0.0966032	2.18119	1.39894	Not Significant	Not Significant	0.722369	0.515691
O35166	Golgi SNAP receptor complex member 2	Gosr2	0	19042000	14624000	0	16502000	16115000	0.145482	0.288291	0.339838	0.787445	0.744851	0.451742	0.430843	4	2.40262	0.0966032	0.381987	0.274895	Not Significant	Not Significant	0.12793	0.10378
O35215	D-dopachrome decarboxylase	Ddt	697390000	368500000	408080000	663640000	986110000	1082400000	-0.91861	-2.56485	-2.84431	0.0623172	0.0273869	0.0920212	0.0518276	4	2.40262	0.0966032	0.192411	0.156458	Not Significant	Not Significant	1.56246	1.20539
O35218	Cleavage and polyadenylation specificity factor subunit 2	Cpsf2	24223000	24220000	9817400	28917000	21832000	20578000	-0.391159	-0.850483	-0.989339	0.44297	0.3584	0.324699	0.276874	4	2.40262	0.0966032	0.317297	0.23448	Not Significant	Not Significant	0.445632	0.353625
O35226	26S proteasome non-ATPase regulatory subunit 4	Psmd4	154820000	100750000	146280000	150560000	148270000	145830000	-0.170916	-0.877138	-0.781032	0.429935	0.462677	0.31798	0.325955	4	2.40262	0.0966032	0.0569536	0.0718324	Not Significant	Not Significant	0.334722	0.366598
O35250	Exocyst complex component 7	Exoc7	16919000	0	22835000	17774000	17571000	15427000	-0.261982	-0.522873	-0.615779	0.628688	0.559282	0.398604	0.362395	4	2.40262	0.0966032	0.376565	0.271508	Not Significant	Not Significant	0.252369	0.201565
O35286	Pre-mRNA-splicing factor ATP-dependent RNA helicase DHX15	Dhx15	203960000	149260000	122080000	187970000	172550000	143830000	-0.109314	-0.448639	-0.441667	0.676923	0.673258	0.41587	0.404488	4	2.40262	0.0966032	0.0890525	0.091886	Not Significant	Not Significant	0.171818	0.169461
O35295	Transcriptional activator protein Pur-beta	Purb	0	16680000	11143000	0	9382600	11738000	0.377814	0.93746	1.06589	0.401597	0.325008	0.305702	0.259763	4	2.40262	0.0966032	0.243636	0.188461	Not Significant	Not Significant	0.488106	0.39621
O35326	Serine/arginine-rich splicing factor 5	Srsf5	85346000	29418000	0	58246000	65893000	50788000	-1.12167	-1.10062	-1.36724	0.332845	0.217608	0.272816	0.198803	4	2.40262	0.0966032	1.55794	1.00956	Not Significant	Not Significant	0.662325	0.477758
O35343	Importin subunit alpha-3	Kpna4	153200000	85871000	88611000	158050000	125480000	117010000	-0.331084	-1.09935	-1.16453	0.333335	0.28576	0.273081	0.238473	4	2.40262	0.0966032	0.136049	0.121247	Not Significant	Not Significant	0.543999	0.47712
O35344	Importin subunit alpha-4	Kpna3	51097000	45123000	42683000	59636000	58665000	59246000	-0.358213	-4.64953	-2.14551	0.00966487	0.0727064	0.0419588	0.0956816	4	2.40262	0.0966032	0.0089034	0.0418132	Not Significant	Not Significant	1.13843	2.0148
O35345	Importin subunit alpha-7	Kpna6	79600000	53840000	53294000	104960000	76241000	66399000	-0.406025	-1.48685	-1.52642	0.211258	0.17468	0.20103	0.171927	4	2.40262	0.0966032	0.111857	0.106133	Not Significant	Not Significant	0.757758	0.675188
O35350	Calpain-1 catalytic subunit	Capn1	18559000	39525000	53276000	0	7456600	10527000	2.0681	4.19818	4.93278	0.0137159	0.00218157	0.0485815	0.015521	4	2.40262	0.0966032	0.364009	0.263664	Significant	Significant	2.66123	1.86278
O35381	Acidic leucine-rich nuclear phosphoprotein 32 family member A	Anp32a	166390000	241140000	231780000	90318000	116220000	134200000	0.907622	3.8123	3.71844	0.0189027	0.00877567	0.0538382	0.0277436	4	2.40262	0.0966032	0.0850212	0.0893674	Not Significant	Not Significant	2.05672	1.72348
O35382	Exocyst complex component 4	Exoc4	18618000	24445000	24488000	13766000	21354000	19204000	0.327097	1.41199	1.36179	0.230807	0.219234	0.214176	0.199706	4	2.40262	0.0966032	0.0804975	0.0865413	Not Significant	Not Significant	0.659093	0.636752
O35405	Phospholipase D3	Pld3	79951000	90315000	114810000	120760000	124300000	118520000	-0.367209	-2.3744	-1.85682	0.076454	0.109635	0.105039	0.125308	4	2.40262	0.0966032	0.0358765	0.0586645	Not Significant	Not Significant	0.960049	1.1166
O35450	FK506-binding protein-like	Fkbpl	2342900	0	0	3340700	0	0	0.418548	0.467324	0.577484	0.66459	0.583337	0.412145	0.372638	4	2.40262	0.0966032	1.20322	0.787955	Not Significant	Not Significant	0.23408	0.177446
O35459	Delta(3,5)-Delta(2,4)-dienoyl-CoA isomerase, mitochondrial	Ech1	67801000	72268000	84795000	51248000	51867000	63402000	0.433934	3.13765	2.28334	0.0349267	0.0597937	0.0687406	0.0846927	4	2.40262	0.0966032	0.0286899	0.0541748	Not Significant	Not Significant	1.22334	1.45684
O35465	Peptidyl-prolyl cis-trans isomerase FKBP8	Fkbp8	20857000	24510000	25377000	19696000	20533000	21309000	0.196705	2.11175	1.14356	0.102289	0.293756	0.125212	0.243086	4	2.40262	0.0966032	0.0130148	0.0443818	Not Significant	Not Significant	0.532013	0.990171
O35469	3 beta-hydroxysteroid dehydrogenase/Delta 5-->4-isomerase type 6;3-beta-hydroxy-Delta(5)-steroid dehydrogenase;Steroid Delta-isomerase;3 beta-hydroxysteroid dehydrogenase/Delta 5-->4-isomerase type 3;3-beta-hydroxy-Delta(5)-steroid dehydrogenase;Steroid Delta-isomerase;3 beta-hydroxysteroid dehydrogenase/Delta 5-->4-isomerase type 2;3-beta-hydroxy-Delta(5)-steroid dehydrogenase;Steroid Delta-isom…	Hsd3b6	269690000	245580000	453710000	241600000	183200000	161780000	0.689731	2.12743	2.30121	0.100499	0.058301	0.1239	0.083456	4	2.40262	0.0966032	0.157667	0.134753	Not Significant	Not Significant	1.23432	0.99784
O35490	Betaine--homocysteine S-methyltransferase 1	Bhmt	15837000	60754000	18326000	1740200000	811740000	913460000	-5.38638	-7.65999	-9.33299	0.00156112	5.82975e-05	0.0225207	0.00294426	4	2.40262	0.0966032	0.741702	0.499625	Significant	Significant	4.23435	2.80656
O35551	Rab GTPase-binding effector protein 1	Rabep1	0	13606000	16612000	0	13656000	13694000	0.310421	0.564535	0.672507	0.602544	0.524777	0.389543	0.349625	4	2.40262	0.0966032	0.453535	0.319595	Not Significant	Not Significant	0.280025	0.220011
O35566	CD151 antigen	Cd151	0	6154800	14402000	0	3479200	3390600	0.727628	1.03155	1.25713	0.36057	0.252621	0.287511	0.219972	4	2.40262	0.0966032	0.746334	0.502519	Not Significant	Not Significant	0.59753	0.44301
O35593	26S proteasome non-ATPase regulatory subunit 14	Psmd14	188450000	204080000	213110000	237740000	249540000	223600000	-0.231554	-3.34262	-1.4049	0.0287655	0.206665	0.063419	0.192627	4	2.40262	0.0966032	0.00719813	0.0407479	Not Significant	Not Significant	0.684733	1.54113
O35594	Intraflagellar transport protein 81 homolog	Ift81	45027000	34668000	63819000	70715000	76254000	62179000	-0.583625	-2.16879	-2.21527	0.0959404	0.0658486	0.120265	0.0906471	4	2.40262	0.0966032	0.108624	0.104113	Not Significant	Not Significant	1.18145	1.018
O35609	Secretory carrier-associated membrane protein 3	Scamp3	110130000	0	0	32908000	0	0	0.43099	0.261848	0.328943	0.806369	0.752694	0.457275	0.433298	4	2.40262	0.0966032	4.06374	2.57505	Not Significant	Not Significant	0.123381	0.093466
O35639	Annexin A3	Anxa3	355800000	402920000	427800000	94570000	86992000	144420000	1.89661	7.91784	7.74199	0.00137688	0.000176942	0.0225059	0.00487264	4	2.40262	0.0966032	0.0860661	0.0900202	Not Significant	Not Significant	3.75217	2.8611
O35643	AP-1 complex subunit beta-1	Ap1b1	250020000	226540000	220860000	227420000	213200000	218150000	0.0806848	1.32276	0.49572	0.256471	0.636648	0.228818	0.393176	4	2.40262	0.0966032	0.00558105	0.0397376	Not Significant	Not Significant	0.1961	0.590961
O35658	Complement component 1 Q subcomponent-binding protein, mitochondrial	C1qbp	374110000	129720000	132280000	232570000	79523000	152420000	0.395766	0.585118	0.710831	0.589885	0.502251	0.384404	0.340527	4	2.40262	0.0966032	0.686248	0.46498	Not Significant	Not Significant	0.299079	0.229232
O35660	Glutathione S-transferase Mu 6	Gstm6	343860000	332970000	277630000	368730000	394380000	398470000	-0.288748	-2.82278	-1.64786	0.0476934	0.147361	0.0791082	0.153601	4	2.40262	0.0966032	0.0156956	0.0460566	Not Significant	Not Significant	0.831618	1.32154
O35678	Monoglyceride lipase	Mgll	38173000	33819000	25578000	15139000	17474000	18314000	0.922954	4.85908	4.27059	0.00828478	0.00453577	0.0394642	0.0203058	4	2.40262	0.0966032	0.0541182	0.0700609	Not Significant	Not Significant	2.34335	2.08172
O35685	Nuclear migration protein nudC	Nudc	362190000	387030000	343740000	424830000	542510000	467880000	-0.387388	-3.40087	-2.15637	0.0272556	0.0715923	0.061795	0.094744	4	2.40262	0.0966032	0.0194628	0.0484101	Not Significant	Not Significant	1.14513	1.56454
O35691	Pinin	Pnn	27027000	19352000	19185000	35272000	22376000	15982000	-0.11002	-0.298335	-0.33304	0.780303	0.749741	0.44987	0.432676	4	2.40262	0.0966032	0.203999	0.163698	Not Significant	Not Significant	0.125088	0.107737
O35704	Serine palmitoyltransferase 1	Sptlc1	18773000	0	0	15553000	0	0	0.400421	0.819615	0.961927	0.458462	0.370995	0.33066	0.282541	4	2.40262	0.0966032	0.358018	0.259921	Not Significant	Not Significant	0.430632	0.338697
O35723	DnaJ homolog subfamily B member 3	Dnajb3	31441000	17828000	33518000	69972000	77473000	62172000	-1.38834	-4.57248	-4.85531	0.0102415	0.00236897	0.0428266	0.0159019	4	2.40262	0.0966032	0.138285	0.122644	Not Significant	Not Significant	2.62544	1.98964
O35737	Heterogeneous nuclear ribonucleoprotein H;Heterogeneous nuclear ribonucleoprotein H, N-terminally processed	Hnrnph1	732050000	646190000	737240000	703130000	791210000	815310000	-0.126389	-1.40752	-0.739574	0.232028	0.485782	0.214984	0.334448	4	2.40262	0.0966032	0.0120948	0.043807	Not Significant	Not Significant	0.313559	0.634459
O35841	Apoptosis inhibitor 5	Api5	77469000	49118000	80453000	105380000	99733000	87244000	-0.527546	-2.17422	-2.13689	0.0953588	0.0736024	0.120178	0.0962385	4	2.40262	0.0966032	0.0883091	0.0914215	Not Significant	Not Significant	1.13311	1.02064
O35855	Branched-chain-amino-acid aminotransferase, mitochondrial	Bcat2	343240000	368600000	389380000	318700000	400170000	300860000	0.120183	0.882201	0.635525	0.427494	0.547117	0.316746	0.357456	4	2.40262	0.0966032	0.0278381	0.0536426	Not Significant	Not Significant	0.26192	0.36907
O35857	Mitochondrial import inner membrane translocase subunit TIM44	Timm44	76372000	85760000	103090000	83167000	93962000	93905000	-0.0400365	-0.288156	-0.210347	0.787542	0.839933	0.451742	0.457012	4	2.40262	0.0966032	0.0289566	0.0543414	Not Significant	Not Significant	0.0757556	0.103726
O35864	COP9 signalosome complex subunit 5	Cops5	112360000	115230000	112510000	129550000	164230000	165270000	-0.423784	-3.6464	-2.34692	0.0218409	0.0546552	0.0564341	0.080154	4	2.40262	0.0966032	0.0202607	0.0489086	Not Significant	Not Significant	1.26237	1.66073
O35887	Calumenin	Calu	256130000	344510000	389730000	201080000	200110000	217340000	0.65846	3.58231	3.09458	0.02312	0.0195531	0.0580967	0.0417523	4	2.40262	0.0966032	0.0506786	0.0679121	Not Significant	Not Significant	1.70879	1.63601
O35900	U6 snRNA-associated Sm-like protein LSm2	Lsm2	46538000	71153000	74718000	51019000	68508000	77553000	-0.0439	-0.15605	-0.161807	0.883552	0.876445	0.477825	0.467166	4	2.40262	0.0966032	0.118711	0.110415	Not Significant	Not Significant	0.0572755	0.0537678
O35945	Aldehyde dehydrogenase, cytosolic 1	Aldh1a7	85787000	144900000	165190000	118080000	100850000	108000000	0.225003	0.759605	0.800612	0.489796	0.452035	0.34296	0.321438	4	2.40262	0.0966032	0.131611	0.118474	Not Significant	Not Significant	0.344828	0.309985
O35969	Guanidinoacetate N-methyltransferase	Gamt	334040000	353950000	267670000	302030000	341100000	333780000	-0.0399207	-0.29748	-0.212122	0.78091	0.838605	0.44987	0.456994	4	2.40262	0.0966032	0.027013	0.0531271	Not Significant	Not Significant	0.0764427	0.107399
O54692	Centromere/kinetochore protein zw10 homolog	Zw10	22910000	26513000	31517000	36012000	43607000	45930000	-0.637889	-3.74094	-3.10035	0.0201046	0.0194037	0.055235	0.0416853	4	2.40262	0.0966032	0.0436133	0.0634981	Not Significant	Not Significant	1.71211	1.6967
O54724	Polymerase I and transcript release factor	Cavin1	164890000	360430000	204890000	111020000	78346000	137160000	1.11715	2.72119	3.10485	0.0529219	0.0192882	0.0839494	0.0416853	4	2.40262	0.0966032	0.252813	0.194195	Not Significant	Not Significant	1.71471	1.27636
O54734	Dolichyl-diphosphooligosaccharide--protein glycosyltransferase 48 kDa subunit	Ddost	277530000	247130000	198870000	315330000	309690000	250040000	-0.280036	-1.58002	-1.33818	0.189254	0.226403	0.187576	0.203955	4	2.40262	0.0966032	0.0471189	0.0656881	Not Significant	Not Significant	0.645118	0.722955
O54774	AP-3 complex subunit delta-1	Ap3d1	19995000	21553000	29586000	20868000	16013000	13716000	0.492016	1.98801	1.9691	0.117718	0.0934519	0.135855	0.111297	4	2.40262	0.0966032	0.0918781	0.0936512	Not Significant	Not Significant	1.02941	0.929157
O54781	SRSF protein kinase 2;SRSF protein kinase 2 N-terminal;SRSF protein kinase 2 C-terminal	Srpk2	13168000	9146800	13720000	20420000	20183000	18105000	-0.724952	-3.73806	-3.32054	0.020155	0.0145315	0.055235	0.0358328	4	2.40262	0.0966032	0.0564178	0.0714976	Not Significant	Not Significant	1.83769	1.69562
O54782	Epididymis-specific alpha-mannosidase	Man2b2	64460000	58329000	57428000	47890000	68526000	41875000	0.217302	0.994915	0.935378	0.376089	0.383517	0.295028	0.28808	4	2.40262	0.0966032	0.0715562	0.0809552	Not Significant	Not Significant	0.416215	0.424709
O54818	Tumor protein D53	Tpd52l1	0	11201000	15187000	0	16858000	16463000	-0.197988	-0.415841	-0.486254	0.698867	0.642984	0.424433	0.395413	4	2.40262	0.0966032	0.340026	0.24868	Not Significant	Not Significant	0.1918	0.155605
O54826	Protein AF-10	Mllt10	9523300	0	6671100	14396000	15303000	9544300	-0.903044	-2.65811	-2.91042	0.0565013	0.025035	0.0865368	0.0485711	4	2.40262	0.0966032	0.173126	0.14441	Not Significant	Not Significant	1.60145	1.24794
O54833	Casein kinase II subunit alpha	Csnk2a2	98938000	110810000	143840000	133470000	193600000	169910000	-0.492405	-2.19663	-2.08901	0.0930013	0.0787889	0.118663	0.100505	4	2.40262	0.0966032	0.0753741	0.0833404	Not Significant	Not Significant	1.10354	1.03151
O54863	Testis-specific serine/threonine-protein kinase 2	Tssk2	5720900	0	0	11379000	0	0	0.0251248	0.0669557	0.0750289	0.94983	0.942482	0.496326	0.48586	4	2.40262	0.0966032	0.211214	0.168206	Not Significant	Not Significant	0.0257271	0.0223541
O54879	High mobility group protein B3	Hmgb3	0	0	21010000	27288000	32546000	37102000	-1.25003	-3.54433	-3.91636	0.0239201	0.00689004	0.0589371	0.0246367	4	2.40262	0.0966032	0.186579	0.152815	Not Significant	Not Significant	2.16178	1.62124
O54887	Testis-specific serine kinase substrate	Tsks	82949000	37216000	84045000	161200000	137390000	111930000	-1.0854	-2.60034	-2.97604	0.0600266	0.0229128	0.0901713	0.0461146	4	2.40262	0.0966032	0.261343	0.199523	Not Significant	Not Significant	1.63992	1.22166
O54901	OX-2 membrane glycoprotein	Cd200	0	0	11344000	0	3534300	3774800	0.978728	2.68117	2.98626	0.0551616	0.0226	0.0854404	0.0457128	4	2.40262	0.0966032	0.199879	0.161124	Not Significant	Not Significant	1.64589	1.25836
O54916	RalBP1-associated Eps domain-containing protein 1	Reps1	0	16138000	17127000	0	14536000	11861000	0.526322	1.35105	1.52586	0.248044	0.174814	0.223116	0.171955	4	2.40262	0.0966032	0.227642	0.178469	Not Significant	Not Significant	0.757423	0.605472
O54941	SWI/SNF-related matrix-associated actin-dependent regulator of chromatin subfamily E member 1	Smarce1	0	11946000	10017000	10619000	13829000	10628000	-0.349644	-1.15451	-1.22499	0.31257	0.263727	0.261107	0.226354	4	2.40262	0.0966032	0.137578	0.122202	Not Significant	Not Significant	0.578845	0.505052
O54946	DnaJ homolog subfamily B member 6	Dnajb6	11385000	9066100	9754700	19215000	0	0	-0.295832	-0.872067	-0.954489	0.43239	0.374471	0.319231	0.283729	4	2.40262	0.0966032	0.172617	0.144092	Not Significant	Not Significant	0.426582	0.364124
O54962	Barrier-to-autointegration factor;Barrier-to-autointegration factor, N-terminally processed	Banf1	145610000	85947000	55958000	198600000	122660000	109630000	-0.643709	-1.34716	-1.57609	0.249185	0.162975	0.223898	0.1638	4	2.40262	0.0966032	0.342477	0.250212	Not Significant	Not Significant	0.787879	0.603478
O54984	ATPase Asna1	Asna1	82477000	78029000	102880000	105320000	106310000	122740000	-0.351185	-2.48625	-1.83487	0.0677555	0.113108	0.0967936	0.128459	4	2.40262	0.0966032	0.0299275	0.0549479	Not Significant	Not Significant	0.946505	1.16906
O54988	STE20-like serine/threonine-protein kinase	Slk	0	8812200	7484700	0	6204200	4931400	0.674788	1.45715	1.69684	0.218806	0.13753	0.206302	0.147099	4	2.40262	0.0966032	0.321676	0.237216	Not Significant	Not Significant	0.861602	0.659941
O55013	Trafficking protein particle complex subunit 3	Trappc3	31143000	32114000	27348000	27023000	41475000	37561000	-0.207373	-1.03763	-0.935671	0.358047	0.383378	0.28627	0.28808	4	2.40262	0.0966032	0.0599113	0.0736802	Not Significant	Not Significant	0.416373	0.446061
O55022	Membrane-associated progesterone receptor component 1	Pgrmc1	326330000	403460000	303990000	579280000	627280000	778220000	-0.940256	-5.31978	-4.49868	0.00600645	0.00349989	0.0354849	0.0186062	4	2.40262	0.0966032	0.0468593	0.065526	Not Significant	Not Significant	2.45595	2.22138
O55023	Inositol monophosphatase 1	Impa1	247130000	333590000	284130000	252400000	331760000	326810000	-0.0748022	-0.418005	-0.355904	0.697408	0.733348	0.42386	0.426019	4	2.40262	0.0966032	0.0480348	0.0662604	Not Significant	Not Significant	0.13469	0.156513
O55026	Ectonucleoside triphosphate diphosphohydrolase 2	Entpd2	55886000	124710000	76083000	22382000	27083000	28347000	1.64921	4.67139	5.16297	0.00950848	0.00171599	0.0417894	0.0137019	4	2.40262	0.0966032	0.186962	0.153054	Not Significant	Not Significant	2.76548	2.02189
O55029	Coatomer subunit beta	Copb2	221500000	203740000	236260000	198520000	157880000	148510000	0.398579	2.81382	2.08049	0.0481294	0.0797495	0.0796532	0.101276	4	2.40262	0.0966032	0.0300973	0.055054	Not Significant	Not Significant	1.09827	1.31759
O55057	Retinal rod rhodopsin-sensitive cGMP 3,5-cyclic phosphodiesterase subunit delta	Pde6d	32822000	0	0	41512000	65554000	68081000	-1.98438	-2.79784	-3.41102	0.0489192	0.0129301	0.0802331	0.0337915	4	2.40262	0.0966032	0.754565	0.507661	Not Significant	Not Significant	1.8884	1.31052
O55060	Thiopurine S-methyltransferase	Tpmt	25743000	47265000	50468000	40163000	53857000	53691000	-0.306453	-0.90256	-0.988088	0.417796	0.358967	0.312661	0.27718	4	2.40262	0.0966032	0.172929	0.144287	Not Significant	Not Significant	0.444945	0.379035
O55102	Biogenesis of lysosome-related organelles complex 1 subunit 1	Bloc1s1	4727900	0	0	3159700	0	0	0.112679	0.208237	0.247606	0.845217	0.81219	0.468316	0.45031	4	2.40262	0.0966032	0.439198	0.310637	Not Significant	Not Significant	0.0903425	0.0730318
O55126	Protein NipSnap homolog 2	Nipsnap2	39469000	27309000	58605000	40158000	32313000	25301000	0.314708	0.846434	0.946598	0.444978	0.378186	0.325381	0.285606	4	2.40262	0.0966032	0.207358	0.165796	Not Significant	Not Significant	0.422294	0.351661
O55128	Histone deacetylase complex subunit SAP18	Sap18	31832000	25219000	41291000	42063000	35766000	28449000	-0.122901	-0.467912	-0.473861	0.664204	0.651328	0.412145	0.39785	4	2.40262	0.0966032	0.103483	0.100902	Not Significant	Not Significant	0.1862	0.177699
O55131	Septin-7	2007-09-01	212960000	250980000	281890000	170930000	140770000	145380000	0.702238	4.8138	3.62816	0.00856155	0.00981902	0.0401569	0.0295508	4	2.40262	0.0966032	0.0319214	0.0561936	Not Significant	Not Significant	2.00793	2.06745
O55135	Eukaryotic translation initiation factor 6	Eif6	79042000	100540000	84322000	83698000	143650000	153380000	-0.48683	-1.64661	-1.73451	0.174983	0.130401	0.1774	0.141439	4	2.40262	0.0966032	0.131118	0.118166	Not Significant	Not Significant	0.88472	0.757005
O55142	60S ribosomal protein L35a	Rpl35a	33333000	47730000	48478000	61092000	45751000	45747000	-0.243095	-1.08178	-1.02988	0.340209	0.34039	0.277192	0.268873	4	2.40262	0.0966032	0.075747	0.0835734	Not Significant	Not Significant	0.468023	0.468255
O55143	Sarcoplasmic/endoplasmic reticulum calcium ATPase 2	Atp2a2	450090000	361390000	387170000	552500000	432130000	347140000	-0.132073	-0.61418	-0.573382	0.57231	0.585949	0.377571	0.374	4	2.40262	0.0966032	0.0693635	0.0795854	Not Significant	Not Significant	0.23214	0.242369
O55201	Transcription elongation factor SPT5	Supt5h	98693000	101770000	64421000	101680000	108410000	115290000	-0.324622	-1.48067	-1.39442	0.212806	0.209659	0.202036	0.194398	4	2.40262	0.0966032	0.0720992	0.0812944	Not Significant	Not Significant	0.678486	0.672017
O55222	Integrin-linked protein kinase	Ilk	47180000	81229000	90939000	32606000	29530000	35563000	1.11579	3.69066	3.91396	0.0210066	0.00691006	0.0558611	0.0246367	4	2.40262	0.0966032	0.137104	0.121906	Not Significant	Not Significant	2.16052	1.67764
O55229	Choline/ethanolamine kinase	Chkb	1926200	0	0	3036000	0	0	-0.47592	-0.433514	-0.539873	0.686997	0.607539	0.419896	0.38322	4	2.40262	0.0966032	1.80781	1.16567	Not Significant	Not Significant	0.216426	0.163045
O55234	Proteasome subunit beta type-5	Psmb5	192180000	180000000	205900000	288330000	282650000	298680000	-0.59098	-9.74628	-3.63281	0.000620747	0.00976208	0.0186422	0.0294343	4	2.40262	0.0966032	0.00551517	0.0396965	Not Significant	Not Significant	2.01046	3.20709
O70133	ATP-dependent RNA helicase A	Dhx9	459430000	350030000	447170000	507560000	436340000	389870000	-0.0879591	-0.528207	-0.431818	0.625302	0.680039	0.397801	0.406747	4	2.40262	0.0966032	0.0415953	0.0622373	Not Significant	Not Significant	0.167466	0.20391
O70145	Neutrophil cytosol factor 2	Ncf2	5936400	7721400	0	0	6286600	6355700	0.430932	1.29665	1.41179	0.264493	0.204718	0.23294	0.191472	4	2.40262	0.0966032	0.165676	0.139756	Not Significant	Not Significant	0.688844	0.577586
O70152	Dolichol-phosphate mannosyltransferase subunit 1	Dpm1	0	10507000	11159000	12407000	12344000	9566200	-0.230919	-1.12382	-1.02712	0.323974	0.341594	0.267542	0.26946	4	2.40262	0.0966032	0.0633315	0.0758169	Not Significant	Not Significant	0.46649	0.48949
O70169	Inactive serine protease 39	Prss39	0	0	9530000	14058000	31293000	19600000	-1.9115	-3.29326	-3.94614	0.0301231	0.00664724	0.0648285	0.0244711	4	2.40262	0.0966032	0.505341	0.35196	Not Significant	Not Significant	2.17736	1.5211
O70172	Phosphatidylinositol 5-phosphate 4-kinase type-2 alpha	Pip4k2a	9376600	0	0	4576400	0	0	0.653334	1.83007	2.02795	0.141215	0.0859413	0.153589	0.105879	4	2.40262	0.0966032	0.191172	0.155684	Not Significant	Not Significant	1.0658	0.850118
O70194	Eukaryotic translation initiation factor 3 subunit D	Eif3d	80457000	87974000	102750000	96238000	102960000	79712000	-0.0396847	-0.262637	-0.202433	0.805803	0.845859	0.457147	0.459136	4	2.40262	0.0966032	0.0342472	0.0576466	Not Significant	Not Significant	0.0727021	0.0937714
O70200	Allograft inflammatory factor 1	Aif1	13344000	14732000	11297000	6716300	10109000	8672900	0.638373	3.11145	2.84169	0.0358217	0.0274848	0.0693989	0.0518772	4	2.40262	0.0966032	0.0631416	0.0756982	Not Significant	Not Significant	1.56091	1.44585
O70209	PDZ and LIM domain protein 3	Pdlim3	11788000	54818000	0	21405000	11276000	21371000	0.233428	0.299069	0.366903	0.779782	0.725514	0.44987	0.423141	4	2.40262	0.0966032	0.913806	0.607146	Not Significant	Not Significant	0.139354	0.108027
O70250	Phosphoglycerate mutase 2	Pgam2	810690000	435470000	535210000	1438300000	1798300000	1640700000	-1.49642	-5.34915	-5.53624	0.00588901	0.00117998	0.0354504	0.0117716	4	2.40262	0.0966032	0.11739	0.109589	Not Significant	Not Significant	2.92813	2.22996
O70251	Elongation factor 1-beta	Eef1b	274380000	293220000	179440000	342450000	341470000	336460000	-0.482142	-2.1712	-2.05634	0.0956819	0.0825386	0.120265	0.103325	4	2.40262	0.0966032	0.0739679	0.0824619	Not Significant	Not Significant	1.08334	1.01917
O70252	Heme oxygenase 2	Hmox2	381330000	247550000	361060000	614690000	549530000	549950000	-0.815453	-4.01325	-3.64825	0.0159535	0.00957552	0.0512068	0.0290888	4	2.40262	0.0966032	0.0619294	0.0749409	Not Significant	Not Significant	2.01884	1.79714
O70309	Integrin beta-5	Itgb5	5917000	0	0	3125200	0	0	0.341643	0.787368	0.907297	0.4751	0.397111	0.33645	0.294666	4	2.40262	0.0966032	0.28241	0.212685	Not Significant	Not Significant	0.401088	0.323215
O70310	Glycylpeptide N-tetradecanoyltransferase 1	Nmt1	23333000	20438000	26600000	24965000	23505000	26287000	-0.0940573	-0.788783	-0.517373	0.47436	0.622281	0.33645	0.388746	4	2.40262	0.0966032	0.0213286	0.0495758	Not Significant	Not Significant	0.206014	0.323892
O70311	Glycylpeptide N-tetradecanoyltransferase 2	Nmt2	93510000	53846000	49232000	109050000	62451000	59943000	-0.239893	-0.597359	-0.678731	0.582439	0.521075	0.381457	0.348114	4	2.40262	0.0966032	0.24191	0.187383	Not Significant	Not Significant	0.283099	0.234749
O70318	Band 4.1-like protein 2	Epb41l2	302870000	348180000	287970000	329850000	306800000	322270000	-0.0343093	-0.39203	-0.201637	0.715027	0.846455	0.429799	0.459136	4	2.40262	0.0966032	0.0114888	0.0434285	Not Significant	Not Significant	0.0723959	0.145678
O70325	Phospholipid hydroperoxide glutathione peroxidase, mitochondrial	Gpx4	540210000	265960000	343270000	958930000	1072400000	936190000	-1.42897	-4.68548	-4.98181	0.00940931	0.00207159	0.0415677	0.0151393	4	2.40262	0.0966032	0.139519	0.123414	Not Significant	Not Significant	2.6837	2.02644
O70362	Phosphatidylinositol-glycan-specific phospholipase D	Gpld1	0	35769000	22493000	0	12123000	14074000	0.389993	0.456574	0.562914	0.67167	0.592646	0.414345	0.377083	4	2.40262	0.0966032	1.09442	0.719983	Not Significant	Not Significant	0.227205	0.172844
O70370	Cathepsin S	Ctss	642720000	243550000	190580000	4559600	0	5347000	5.569	8.26226	10.0347	0.00117082	3.76243e-05	0.0225059	0.00253357	4	2.40262	0.0966032	0.681472	0.461997	Significant	Significant	4.42453	2.93151
O70378	ER membrane protein complex subunit 8	Emc8	19223000	17647000	19687000	13869000	17024000	14429000	0.323698	3.15935	1.84668	0.0342053	0.111227	0.0681168	0.126858	4	2.40262	0.0966032	0.0157462	0.0460882	Not Significant	Not Significant	0.953788	1.46591
O70400	PDZ and LIM domain protein 1	Pdlim1	0	55710000	23419000	21046000	19073000	27646000	-0.0654054	-0.0763018	-0.0940897	0.942843	0.927914	0.494842	0.482506	4	2.40262	0.0966032	1.10217	0.724828	Not Significant	Not Significant	0.0324923	0.0255606
O70404	Vesicle-associated membrane protein 8	Vamp8	28642000	37672000	19578000	11255000	11111000	9855900	1.36641	4.87152	5.04631	0.0082107	0.00193626	0.0393394	0.0146913	4	2.40262	0.0966032	0.118012	0.109979	Not Significant	Not Significant	2.71304	2.08562
O70423	Membrane primary amine oxidase	Aoc3	30949000	68756000	30658000	22185000	18430000	17494000	1.06305	2.65818	3.01783	0.0564974	0.0216624	0.0865368	0.0443949	4	2.40262	0.0966032	0.239898	0.186126	Not Significant	Not Significant	1.66429	1.24797
O70433	Four and a half LIM domains protein 2	Fhl2	0	39550000	38553000	0	11499000	17531000	1.10407	1.27136	1.56876	0.272497	0.164655	0.237949	0.164754	4	2.40262	0.0966032	1.13121	0.742968	Not Significant	Not Significant	0.783424	0.564638
O70435	Proteasome subunit alpha type-3	Psma3	251770000	186490000	232780000	247350000	260760000	236410000	-0.160132	-1.17789	-0.847344	0.304135	0.427337	0.256446	0.310676	4	2.40262	0.0966032	0.027723	0.0535707	Not Significant	Not Significant	0.369229	0.516934
O70439	Syntaxin-7	Stx7	58567000	60050000	65515000	25513000	31056000	30512000	1.0842	10.5254	6.17818	0.00046079	0.000644783	0.0186422	0.00890643	4	2.40262	0.0966032	0.0159159	0.0461943	Not Significant	Not Significant	3.19059	3.3365
O70451	Monocarboxylate transporter 2	Slc16a7	6727900	5254000	0	13504000	25238000	10371000	-1.27185	-3.15368	-3.58619	0.0343923	0.0103497	0.0681168	0.0302029	4	2.40262	0.0966032	0.243967	0.188668	Not Significant	Not Significant	1.98507	1.46354
O70456	14-3-3 protein sigma	Sfn	201600000	146120000	609110000	141560000	151190000	0	2.23008	1.46308	1.83583	0.217276	0.112955	0.205095	0.128375	4	2.40262	0.0966032	3.48493	2.21344	Not Significant	Not Significant	0.947095	0.662987
O70475	UDP-glucose 6-dehydrogenase	Ugdh	6390500	10385000	9321600	6504700	0	0	0.232965	0.942625	0.933152	0.399245	0.384582	0.305017	0.288683	4	2.40262	0.0966032	0.0916206	0.0934904	Not Significant	Not Significant	0.415011	0.39876
O70480	Vesicle-associated membrane protein 4	Vamp4	13638000	0	0	18396000	21847000	29745000	-1.52919	-3.2356	-3.77938	0.0318061	0.00814061	0.0664146	0.0270144	4	2.40262	0.0966032	0.335045	0.245568	Not Significant	Not Significant	2.08934	1.49749
O70492	Sorting nexin-3	Snx3	97847000	114600000	138810000	68259000	86242000	77821000	0.588178	3.35103	2.82288	0.0285416	0.0281992	0.0632996	0.0525516	4	2.40262	0.0966032	0.0462117	0.0651214	Not Significant	Not Significant	1.54976	1.54452
O70493	Sorting nexin-12	Snx12	23681000	38147000	44700000	11235000	10116000	11864000	1.63478	5.76494	5.99319	0.0044928	0.000763704	0.0322063	0.00971846	4	2.40262	0.0966032	0.120621	0.111608	Not Significant	Not Significant	3.11707	2.34748
O70503	Very-long-chain 3-oxoacyl-CoA reductase	Hsd17b12	56269000	51653000	53941000	65205000	52864000	61671000	-0.146429	-1.50504	-0.844268	0.206765	0.428933	0.197841	0.311415	4	2.40262	0.0966032	0.0141986	0.0451214	Not Significant	Not Significant	0.367611	0.684523
O70551	SRSF protein kinase 1	Srpk1	40033000	26259000	32372000	65981000	51678000	33380000	-0.580612	-1.7232	-1.88284	0.159949	0.105655	0.166052	0.122451	4	2.40262	0.0966032	0.17029	0.142639	Not Significant	Not Significant	0.976108	0.796018
O70566	Protein diaphanous homolog 2	Diaph2	0	8233900	5097400	0	0	5955900	0.118482	0.295466	0.335618	0.782341	0.747885	0.450014	0.432288	4	2.40262	0.0966032	0.241203	0.186941	Not Significant	Not Significant	0.126165	0.106604
O70579	Peroxisomal membrane protein PMP34	Slc25a17	5026500	0	0	4878100	0	0	0.142064	0.252597	0.301663	0.813029	0.772469	0.45915	0.43958	4	2.40262	0.0966032	0.474465	0.33267	Not Significant	Not Significant	0.112119	0.0898938
O70591	Prefoldin subunit 2	Pfdn2	24407000	37390000	29949000	22908000	37469000	38621000	-0.0928264	-0.30735	-0.325848	0.773914	0.754928	0.447833	0.434185	4	2.40262	0.0966032	0.136826	0.121732	Not Significant	Not Significant	0.122094	0.111307
O88271	Craniofacial development protein 1	Cfdp1	0	6823100	0	0	7711900	0	-0.422061	-1.03945	-1.18355	0.357294	0.278666	0.286148	0.234807	4	2.40262	0.0966032	0.247304	0.190752	Not Significant	Not Significant	0.554916	0.446974
O88291	DBIRD complex subunit ZNF326	Znf326	18339000	14314000	22790000	25272000	23101000	20495000	-0.333341	-1.56728	-1.45581	0.192119	0.192662	0.188878	0.18424	4	2.40262	0.0966032	0.0678546	0.0786427	Not Significant	Not Significant	0.715205	0.716431
O88322	Nidogen-2	Nid2	31567000	41024000	57614000	12332000	13552000	0	2.266	3.66968	4.42378	0.0213973	0.00380768	0.0559669	0.0189929	4	2.40262	0.0966032	0.571949	0.393573	Significant	Significant	2.41934	1.66964
O88342	WD repeat-containing protein 1	Wdr1	464500000	634620000	452360000	190550000	210110000	260180000	1.22607	5.96851	5.45429	0.0039581	0.00127915	0.0302545	0.0123789	4	2.40262	0.0966032	0.0632982	0.0757961	Not Significant	Not Significant	2.89308	2.40251
O88379	Bromodomain adjacent to zinc finger domain protein 1A	Baz1a	16654000	16795000	23562000	26456000	27644000	20039000	-0.384336	-1.7488	-1.64871	0.155233	0.147184	0.163114	0.153601	4	2.40262	0.0966032	0.0724492	0.0815131	Not Significant	Not Significant	0.832138	0.809015
O88384	Vesicle transport through interaction with t-SNAREs homolog 1B	Vti1b	14802000	15661000	18968000	10462000	11165000	11585000	0.566712	4.8645	3.1365	0.00825239	0.0184954	0.0394242	0.0405084	4	2.40262	0.0966032	0.0203582	0.0489695	Not Significant	Not Significant	1.73294	2.08342
O88441	Metaxin-2	Mtx2	41289000	19687000	32736000	36547000	25511000	22579000	0.112675	0.297915	0.334399	0.780601	0.748763	0.44987	0.432486	4	2.40262	0.0966032	0.214567	0.1703	Not Significant	Not Significant	0.125656	0.107571
O88448	Kinesin light chain 2	Klc2	58821000	68208000	60497000	55561000	77838000	72955000	-0.126139	-0.77491	-0.625087	0.481652	0.553527	0.339211	0.36086	4	2.40262	0.0966032	0.0397457	0.0610818	Not Significant	Not Significant	0.256861	0.317267
O88455	7-dehydrocholesterol reductase	Dhcr7	8953300	0	0	16401000	0	0	-0.756353	-3.03387	-3.01347	0.0386337	0.0217894	0.0715315	0.0445189	4	2.40262	0.0966032	0.0932281	0.0944946	Not Significant	Not Significant	1.66175	1.41303
O88456	Calpain small subunit 1	Capns1	76938000	72345000	90333000	40422000	32615000	41086000	1.07151	7.45844	5.56587	0.00172673	0.00114628	0.0233274	0.0116418	4	2.40262	0.0966032	0.0309588	0.0555922	Not Significant	Not Significant	2.94071	2.76278
O88487	Cytoplasmic dynein 1 intermediate chain 2	Dync1i2	153270000	144350000	106950000	207240000	178710000	175590000	-0.486184	-2.73781	-2.32126	0.0520227	0.0566721	0.0834612	0.0817733	4	2.40262	0.0966032	0.0473026	0.0658029	Not Significant	Not Significant	1.24663	1.28381
O88502	High affinity cAMP-specific and IBMX-insensitive 3,5-cyclic phosphodiesterase 8A	Pde8a	2594800	0	0	3506200	0	0	-0.41488	-0.566648	-0.69236	0.601237	0.513028	0.389157	0.345035	4	2.40262	0.0966032	0.804101	0.538609	Not Significant	Not Significant	0.289859	0.220954
O88531	Palmitoyl-protein thioesterase 1	Ppt1	1157600000	677950000	915910000	1100200000	690210000	576130000	0.238775	0.669465	0.741691	0.539858	0.484583	0.364653	0.334108	4	2.40262	0.0966032	0.190816	0.155462	Not Significant	Not Significant	0.314631	0.26772
O88532	Zinc finger RNA-binding protein	Zfr	0	5776000	7490000	0	6192000	0	0.0239997	0.0650564	0.0726298	0.951251	0.944317	0.496416	0.486651	4	2.40262	0.0966032	0.204137	0.163784	Not Significant	Not Significant	0.0248822	0.021705
O88543	COP9 signalosome complex subunit 3	Cops3	90452000	87149000	108450000	133460000	125440000	104940000	-0.346386	-2.43078	-1.80435	0.0719201	0.118116	0.100677	0.131739	4	2.40262	0.0966032	0.0304593	0.0552802	Not Significant	Not Significant	0.927693	1.14315
O88544	COP9 signalosome complex subunit 4	Cops4	203450000	193520000	198700000	238250000	262650000	250670000	-0.334553	-7.32739	-2.0963	0.00184614	0.0779759	0.0236628	0.099898	4	2.40262	0.0966032	0.00312695	0.0382044	Not Significant	Not Significant	1.10804	2.73374
O88545	COP9 signalosome complex subunit 6	Cops6	103960000	112220000	117840000	123450000	150850000	158450000	-0.367294	-3.00923	-2.00751	0.0395802	0.0884797	0.072515	0.108154	4	2.40262	0.0966032	0.0223464	0.0502117	Not Significant	Not Significant	1.05316	1.40252
O88561	Long-chain fatty acid transport protein 3	Slc27a3	13784000	16677000	16276000	16077000	15056000	14191000	0.0410959	0.407666	0.235252	0.704395	0.821358	0.426057	0.451426	4	2.40262	0.0966032	0.0152433	0.0457741	Not Significant	Not Significant	0.0854675	0.152184
O88569	Heterogeneous nuclear ribonucleoproteins A2/B1	Hnrnpa2b1	2283000000	1852100000	2380700000	2167800000	2643800000	2386000000	-0.14732	-1.05801	-0.773441	0.349713	0.46685	0.282236	0.326477	4	2.40262	0.0966032	0.0290828	0.0544202	Not Significant	Not Significant	0.330823	0.456289
O88587	Catechol O-methyltransferase	Comt	55757000	69510000	62119000	27199000	26067000	25064000	1.25334	12.7976	7.217	0.000214866	0.000266284	0.0185847	0.00566248	4	2.40262	0.0966032	0.0143871	0.0452391	Not Significant	Not Significant	3.57466	3.66783
O88630	Golgi SNAP receptor complex member 1	Gosr1	6041600	0	0	4638400	0	0	0.0352183	0.12419	0.129109	0.907156	0.901233	0.48466	0.474779	4	2.40262	0.0966032	0.12063	0.111614	Not Significant	Not Significant	0.045163	0.0423182
O88668	Protein CREG1	Creg1	218960000	129840000	42728000	51629000	42822000	37231000	1.29447	1.82731	2.22759	0.14167	0.0647079	0.153778	0.0898421	4	2.40262	0.0966032	0.75275	0.506527	Not Significant	Not Significant	1.18904	0.848723
O88685	26S protease regulatory subunit 6A	Psmc3	206350000	176080000	224110000	292430000	267470000	220440000	-0.360774	-2.28611	-1.81008	0.0842173	0.11716	0.111768	0.131126	4	2.40262	0.0966032	0.0373567	0.0595893	Not Significant	Not Significant	0.93122	1.0746
O88696	ATP-dependent Clp protease proteolytic subunit, mitochondrial	Clpp	23770000	0	17035000	23203000	17351000	0	-0.116167	-0.196978	-0.23641	0.853449	0.820498	0.470655	0.451426	4	2.40262	0.0966032	0.521703	0.362182	Not Significant	Not Significant	0.0859225	0.0688225
O88700	Bloom syndrome protein homolog	Blm	0	68292000	121410000	0	41847000	31964000	0.73762	0.470572	0.590722	0.662459	0.574954	0.411911	0.369159	4	2.40262	0.0966032	3.68556	2.33878	Not Significant	Not Significant	0.240367	0.178841
O88712	C-terminal-binding protein 1	Ctbp1	22711000	29654000	30606000	15557000	18024000	19902000	0.628345	3.67133	3.0491	0.0213661	0.0207749	0.0559669	0.0433225	4	2.40262	0.0966032	0.043938	0.0637009	Not Significant	Not Significant	1.68246	1.67028
O88735	Ensconsin	Map7	11204000	0	0	14837000	0	0	-0.0179758	-0.0628446	-0.0655154	0.952905	0.949762	0.496681	0.487901	4	2.40262	0.0966032	0.122724	0.112922	Not Significant	Not Significant	0.0223853	0.0209502
O88736	3-keto-steroid reductase	Hsd17b7	9415500	12931000	16974000	10614000	11341000	13557000	0.113572	0.424813	0.432926	0.692828	0.679275	0.421672	0.406591	4	2.40262	0.0966032	0.10721	0.10323	Not Significant	Not Significant	0.167955	0.159375
O88746	Target of Myb protein 1	Tom1	37498000	30657000	36626000	31581000	36325000	37801000	-0.0141819	-0.117368	-0.0777294	0.912225	0.940416	0.486319	0.485527	4	2.40262	0.0966032	0.0219007	0.0499332	Not Significant	Not Significant	0.02668	0.0398978
O88811	Signal transducing adapter molecule 2	Stam2	20903000	17168000	27510000	20775000	36665000	31813000	-0.431827	-1.36863	-1.46943	0.242944	0.189066	0.221618	0.181878	4	2.40262	0.0966032	0.149327	0.129542	Not Significant	Not Significant	0.723387	0.614493
O88844	Isocitrate dehydrogenase [NADP] cytoplasmic	Idh1	1390600000	1349300000	1969100000	1307700000	1037100000	1079900000	0.44499	2.19079	1.9912	0.09361	0.0905576	0.119068	0.109218	4	2.40262	0.0966032	0.061886	0.0749138	Not Significant	Not Significant	1.04308	1.02868
O88848	ADP-ribosylation factor-like protein 6	Arl6	13043000	10501000	10754000	21429000	32741000	19853000	-1.08045	-4.40372	-4.3471	0.0116574	0.00415442	0.0449711	0.0196491	4	2.40262	0.0966032	0.0902941	0.0926616	Not Significant	Not Significant	2.38149	1.9334
O88851	Putative hydrolase RBBP9	Rbbp9	39398000	93685000	72209000	36342000	69544000	72530000	0.179992	0.366517	0.430467	0.732543	0.680972	0.434606	0.407004	4	2.40262	0.0966032	0.361752	0.262253	Not Significant	Not Significant	0.166871	0.135167
O88947	Coagulation factor X;Factor X light chain;Factor X heavy chain;Activated factor Xa heavy chain	F10	0	24107000	28917000	0	10163000	0	0.67606	1.43844	1.6788	0.223699	0.141075	0.209354	0.14978	4	2.40262	0.0966032	0.331342	0.243255	Not Significant	Not Significant	0.850551	0.650336
O88952	Protein lin-7 homolog C	Lin7c	0	12554000	8357800	0	6040100	8774400	0.246016	0.740454	0.806143	0.500132	0.44906	0.346079	0.320839	4	2.40262	0.0966032	0.165585	0.139699	Not Significant	Not Significant	0.347696	0.300915
O88958	Glucosamine-6-phosphate isomerase 1	Gnpda1	201910000	244380000	227810000	213890000	229300000	225890000	0.00698129	0.0811639	0.0411452	0.93921	0.968433	0.493602	0.491908	4	2.40262	0.0966032	0.0110978	0.0431842	Not Significant	Not Significant	0.0139302	0.0272371
O88983	Syntaxin-8	Stx8	0	5042500	10044000	0	6284200	4623200	0.749286	1.53965	1.80601	0.198483	0.117839	0.193427	0.131703	4	2.40262	0.0966032	0.355255	0.258195	Not Significant	Not Significant	0.928712	0.702276
O88986	2-amino-3-ketobutyrate coenzyme A ligase, mitochondrial	Gcat	0	0	3906300	0	7646600	0	-0.283011	-0.455463	-0.549374	0.672404	0.601372	0.414345	0.380891	4	2.40262	0.0966032	0.579149	0.398071	Not Significant	Not Significant	0.220857	0.17237
O88987	A-kinase anchor protein 3	Akap3	479430000	144360000	262530000	967210000	837570000	698010000	-1.65327	-3.19105	-3.7744	0.033183	0.0081906	0.0677704	0.0270144	4	2.40262	0.0966032	0.402636	0.287796	Not Significant	Not Significant	2.08668	1.47908
O89017	Legumain	Lgmn	355330000	241700000	255880000	78329000	63673000	53205000	2.12395	8.97517	8.73276	0.000852837	8.68164e-05	0.0197401	0.00356708	4	2.40262	0.0966032	0.0840026	0.088731	Significant	Significant	4.0614	3.06913
O89020	Afamin	Afm	48687000	171830000	120040000	17372000	10176000	47130000	2.30444	2.72931	3.363	0.0524805	0.0137547	0.0836116	0.0348421	4	2.40262	0.0966032	1.06934	0.704316	Not Significant	Significant	1.86155	1.28
O89023	Tripeptidyl-peptidase 1	Tpp1	201240000	56705000	48766000	52334000	25770000	33080000	1.2136	1.6993	2.07273	0.164491	0.0806348	0.169694	0.101786	4	2.40262	0.0966032	0.765074	0.514227	Not Significant	Not Significant	1.09348	0.783859
O89051	Integral membrane protein 2B;BRI2, membrane form;BRI2 intracellular domain;BRI2C, soluble form;Bri23 peptide	Itm2b	16511000	12561000	11546000	13649000	13262000	13103000	0.00459373	0.0293093	0.0231094	0.978022	0.982267	0.502274	0.495431	4	2.40262	0.0966032	0.0368478	0.0592713	Not Significant	Not Significant	0.00777064	0.00965139
O89053	Coronin-1A	Coro1a	45506000	133700000	50670000	5607700	8581900	6985800	3.28026	6.24475	7.39901	0.00335173	0.000230482	0.0284036	0.00539839	4	2.40262	0.0966032	0.413882	0.294822	Significant	Significant	3.63736	2.47473
O89079	Coatomer subunit epsilon	Cope	116250000	68677000	62066000	103180000	63319000	76968000	-0.00706656	-0.0203433	-0.0223968	0.984744	0.982813	0.504307	0.495431	4	2.40262	0.0966032	0.180994	0.149326	Not Significant	Not Significant	0.00752899	0.00667673
O89086	RNA-binding protein 3	Rbm3	349830000	235480000	198950000	247810000	154880000	224250000	0.309724	0.975666	1.04931	0.384476	0.332021	0.298413	0.263809	4	2.40262	0.0966032	0.15116	0.130687	Not Significant	Not Significant	0.478835	0.415131
O89110	Caspase-8;Caspase-8 subunit p18;Caspase-8 subunit p10	Casp8	0	10554000	18766000	0	0	7020400	0.737797	2.22068	2.41767	0.0905435	0.0494703	0.116705	0.0747199	4	2.40262	0.0966032	0.165574	0.139692	Not Significant	Not Significant	1.30566	1.04314
O89112	LanC-like protein 1	Lancl1	224580000	114160000	121010000	383640000	312200000	273170000	-1.13287	-3.29995	-3.62259	0.0299349	0.00988771	0.0647301	0.0296629	4	2.40262	0.0966032	0.176782	0.146694	Not Significant	Not Significant	2.0049	1.52382
P00015	Cytochrome c, testis-specific	Cyct	24395000	15586000	15869000	111790000	64557000	62547000	-2.07506	-6.02553	-6.61977	0.00382257	0.000436946	0.0300573	0.00757542	4	2.40262	0.0966032	0.177895	0.14739	Significant	Significant	3.35957	2.41765
P00329	Alcohol dehydrogenase 1	Adh1	1095400000	1025100000	1610200000	166590000	229870000	294940000	2.4409	7.79114	8.34834	0.00146384	0.000113464	0.0225207	0.0037613	4	2.40262	0.0966032	0.147228	0.128231	Significant	Significant	3.94514	2.83451
P00342	L-lactate dehydrogenase C chain	Ldhc	9750500000	3960600000	6001700000	17940000000	17008000000	17213000000	-1.5007	-3.98801	-4.47157	0.0162919	0.00360796	0.051492	0.018753	4	2.40262	0.0966032	0.212407	0.168951	Not Significant	Not Significant	2.44274	1.78803
P00375	Dihydrofolate reductase	Dhfr	5315900	0	0	8429600	0	0	-0.186751	-0.228509	-0.281078	0.830457	0.787515	0.465119	0.443449	4	2.40262	0.0966032	1.00187	0.662162	Not Significant	Not Significant	0.103741	0.0806828
P00397	Cytochrome c oxidase subunit 1	Mtco1	61937000	0	20923000	72029000	44536000	46460000	-0.948587	-1.48952	-1.80057	0.210593	0.11875	0.20063	0.132356	4	2.40262	0.0966032	0.608353	0.416316	Not Significant	Not Significant	0.925365	0.676556
P00405	Cytochrome c oxidase subunit 2	Mtco2	87155000	81291000	146800000	108220000	106440000	130220000	-0.176095	-0.618426	-0.643771	0.569771	0.542085	0.376523	0.356274	4	2.40262	0.0966032	0.121621	0.112233	Not Significant	Not Significant	0.265933	0.2443
P00416	Cytochrome c oxidase subunit 3	mt-Co3	17690000	0	0	21365000	0	0	0.0128903	0.0180288	0.0219926	0.986479	0.983123	0.504724	0.495433	4	2.40262	0.0966032	0.766802	0.515306	Not Significant	Not Significant	0.00739196	0.00591202
P00493	Hypoxanthine-guanine phosphoribosyltransferase	Hprt1	151410000	164850000	204290000	108680000	131610000	176020000	0.339379	1.41617	1.38497	0.229669	0.212391	0.213482	0.195987	4	2.40262	0.0966032	0.0861456	0.0900699	Not Significant	Not Significant	0.672863	0.638898
P00920	Carbonic anhydrase 2	Ca2	95372000	219580000	124490000	100490000	116020000	113080000	0.327882	0.909598	1.01021	0.414486	0.349039	0.31146	0.272377	4	2.40262	0.0966032	0.194907	0.158018	Not Significant	Not Significant	0.457126	0.38249
P01027	Complement C3;Complement C3 beta chain;C3-beta-c;Complement C3 alpha chain;C3a anaphylatoxin;Acylation stimulating protein;Complement C3b alpha chain;Complement C3c alpha chain fragment 1;Complement C3dg fragment;Complement C3g fragment;Complement C3d fragment;Complement C3f fragment;Complement C3c alpha chain fragment 2	C3	1099700000	3484500000	2763900000	563800000	521210000	1238700000	1.62092	2.50944	3.03719	0.0660969	0.0211082	0.0952836	0.0436711	4	2.40262	0.0966032	0.625834	0.427237	Not Significant	Not Significant	1.67555	1.17982
P01029	Complement C4-B;Complement C4 beta chain;Complement C4 alpha chain;C4a anaphylatoxin;Complement C4 gamma chain	C4b	53620000	230510000	177100000	8783900	18774000	36703000	2.83282	3.21964	3.97529	0.0322914	0.00641868	0.0668357	0.0241242	4	2.40262	0.0966032	1.16122	0.761714	Significant	Significant	2.19255	1.49091
P01672	Ig kappa chain V-III region PC 7940;Ig kappa chain V-III region PC 7175;Ig kappa chain V-III region PC 6684;Ig kappa chain V-III region PC 4050;Ig kappa chain V-III region ABPC 22/PC 9245;Ig kappa chain V-III region MOPC 63	NA	0	48576000	39697000	0	0	8154600	1.10964	1.15757	1.43464	0.311452	0.198377	0.260637	0.18694	4	2.40262	0.0966032	1.37834	0.89736	Not Significant	Not Significant	0.702509	0.506608
P01837	Ig kappa chain C region	Igkc	450970000	488650000	831680000	73135000	36749000	92138000	3.17719	6.54859	7.67817	0.00281119	0.000185725	0.0280757	0.00492325	4	2.40262	0.0966032	0.353088	0.25684	Significant	Significant	3.73113	2.55111
P01867	Ig gamma-2B chain C region	Igh-3	127430000	257900000	136840000	0	0	18856000	3.81187	7.99064	9.34631	0.0013298	5.77995e-05	0.0225059	0.00294426	4	2.40262	0.0966032	0.341353	0.249509	Significant	Significant	4.23808	2.87621
P01868	Ig gamma-1 chain C region secreted form;Ig gamma-1 chain C region, membrane-bound form	Ighg1	474580000	902430000	691340000	72321000	65061000	235370000	2.68753	4.11848	4.9889	0.0146306	0.00205622	0.0488695	0.015105	4	2.40262	0.0966032	0.638738	0.435299	Significant	Significant	2.68693	1.83474
P01898	H-2 class I histocompatibility antigen, Q10 alpha chain	H2-Q10	13488000	77471000	13956000	5029600	5244600	9922600	1.93334	2.16998	2.68084	0.0958125	0.0342732	0.120265	0.0599457	4	2.40262	0.0966032	1.19068	0.780122	Not Significant	Not Significant	1.46505	1.01858
P01899	H-2 class I histocompatibility antigen, D-B alpha chain	H2-D1	119180000	194540000	170560000	30371000	22769000	26665000	2.58152	10.6224	10.4466	0.000444661	2.9463e-05	0.0186422	0.0023808	4	2.40262	0.0966032	0.0885927	0.0915987	Significant	Significant	4.53072	3.35197
P01942	Hemoglobin subunit alpha	Hba	2866800000	10940000000	4619800000	1429700000	1565800000	2491200000	1.56645	2.53713	3.05846	0.0641763	0.0205167	0.0936018	0.0430386	4	2.40262	0.0966032	0.571795	0.393477	Not Significant	Not Significant	1.68789	1.19263
P02088	Hemoglobin subunit beta-1	Hbb-b1	4507600000	21825000000	12283000000	2142900000	3222200000	3864400000	1.83367	2.57945	3.14528	0.0613631	0.0182818	0.0913528	0.0404517	4	2.40262	0.0966032	0.758017	0.509818	Not Significant	Not Significant	1.73798	1.21209
P02089	Hemoglobin subunit beta-2	Hbb-b2	377060000	2117100000	936670000	169430000	244000000	320310000	1.93977	2.53028	3.10081	0.0646454	0.0193918	0.094099	0.0416853	4	2.40262	0.0966032	0.881566	0.587004	Not Significant	Not Significant	1.71238	1.18946
P02463	Collagen alpha-1(IV) chain;Arresten	Col4a1	30449000	19566000	0	15642000	0	0	1.01115	1.53559	1.86151	0.199439	0.108907	0.193824	0.124998	4	2.40262	0.0966032	0.650387	0.442576	Not Significant	Not Significant	0.962943	0.70019
P02468	Laminin subunit gamma-1	Lamc1	125980000	155960000	299120000	78788000	23776000	26036000	2.3043	3.43704	4.17259	0.0263652	0.00508233	0.0610128	0.0214457	4	2.40262	0.0966032	0.674217	0.457464	Significant	Significant	2.29394	1.57897
P02469	Laminin subunit beta-1	Lamb1	19107000	19687000	38571000	20048000	0	0	1.27431	2.13727	2.5679	0.0993924	0.0400873	0.123183	0.0662306	4	2.40262	0.0966032	0.533241	0.369391	Not Significant	Not Significant	1.39699	1.00265
P02798	Metallothionein-2	Mt2	11012000	4430300	16395000	15911000	8841700	11553000	-0.34096	-0.558878	-0.672968	0.606053	0.524502	0.390889	0.349625	4	2.40262	0.0966032	0.558294	0.385042	Not Significant	Not Significant	0.280253	0.217489
P03930	ATP synthase protein 8	Mtatp8	75412000	0	126730000	58320000	0	53720000	0.604581	0.395533	0.496325	0.712638	0.636245	0.428834	0.393176	4	2.40262	0.0966032	3.50456	2.22571	Not Significant	Not Significant	0.196376	0.147131
P03958	Adenosine deaminase	Ada	69673000	112260000	131140000	24554000	26394000	36411000	1.81396	5.57469	6.03597	0.00507467	0.000734136	0.0334927	0.00948429	4	2.40262	0.0966032	0.158819	0.135472	Not Significant	Not Significant	3.13422	2.29459
P03987	Ig gamma-3 chain C region	NA	230320000	455210000	349390000	22145000	22898000	53314000	3.46803	6.88359	8.11263	0.00233416	0.000134407	0.0256392	0.00394944	4	2.40262	0.0966032	0.380738	0.274115	Significant	Significant	3.87158	2.63187
P03991	H-2 class I histocompatibility antigen, K-W28 alpha chain;H-2 class I histocompatibility antigen, K-Q alpha chain;H-2 class I histocompatibility antigen, K-K alpha chain	H2-K1	10777000	17509000	13176000	6950600	0	0	0.944766	4.20615	4.00357	0.0136282	0.00620515	0.0485815	0.0239339	4	2.40262	0.0966032	0.0756779	0.0835303	Not Significant	Not Significant	2.20725	1.86556
P04117	Fatty acid-binding protein, adipocyte	Fabp4	193770000	363940000	118500000	0	8802900	22426000	4.06866	6.29323	7.61731	0.00325741	0.000194567	0.0284036	0.00492325	4	2.40262	0.0966032	0.626969	0.427947	Significant	Significant	3.71093	2.48713
P04186	Complement factor B;Complement factor B Ba fragment;Complement factor B Bb fragment	Cfb	81813000	251010000	189330000	37431000	39429000	101170000	1.56754	2.32842	2.82765	0.0803909	0.0280162	0.108467	0.0525265	4	2.40262	0.0966032	0.679841	0.460978	Not Significant	Not Significant	1.55259	1.09479
P04945	Ig kappa chain V-VI region NQ2-6.1	NA	0	11932000	22254000	0	0	18041000	-0.0663526	-0.0952259	-0.115946	0.928715	0.911247	0.49107	0.477991	4	2.40262	0.0966032	0.728277	0.491238	Not Significant	Not Significant	0.040364	0.0321175
P05063	Fructose-bisphosphate aldolase C	Aldoc	0	7750600	0	0	9629200	8631800	-0.64578	-2.57496	-2.56347	0.0616548	0.0403353	0.0916123	0.0664496	4	2.40262	0.0966032	0.0943453	0.0951926	Not Significant	Not Significant	1.39431	1.21003
P05064	Fructose-bisphosphate aldolase A	Aldoa	1615700000	1394900000	1276800000	1283800000	1293700000	1270700000	0.149102	1.5011	0.856131	0.207729	0.422805	0.198362	0.308351	4	2.40262	0.0966032	0.0147992	0.0454966	Not Significant	Not Significant	0.37386	0.682503
P05132	cAMP-dependent protein kinase catalytic subunit alpha	Prkaca	199190000	185830000	203080000	333890000	352110000	277680000	-0.706215	-6.3707	-3.95749	0.00311337	0.00655714	0.0284036	0.0242952	4	2.40262	0.0966032	0.0184328	0.0477667	Not Significant	Not Significant	2.18329	2.50677
P05201	Aspartate aminotransferase, cytoplasmic	Got1	270780000	202730000	272390000	148840000	74463000	77865000	1.37165	3.89506	4.30236	0.0176149	0.00437288	0.0527023	0.020081	4	2.40262	0.0966032	0.186015	0.152463	Not Significant	Not Significant	2.35923	1.75412
P05202	Aspartate aminotransferase, mitochondrial	Got2	177630000	250920000	342330000	111530000	151970000	153070000	0.852027	2.73018	2.92221	0.0524332	0.0246385	0.0836116	0.0480326	4	2.40262	0.0966032	0.146088	0.127519	Not Significant	Not Significant	1.60839	1.28039
P05213	Tubulin alpha-1B chain	Tuba1b	6562900000	6705300000	8151500000	7380500000	8228400000	8675900000	-0.184881	-1.52942	-1.01319	0.200897	0.347714	0.194666	0.272131	4	2.40262	0.0966032	0.0219192	0.0499448	Not Significant	Not Significant	0.458777	0.697026
P05214	Tubulin alpha-3 chain	Tuba3a	1011000000	671770000	984360000	1461900000	1922900000	1657700000	-0.933744	-4.20343	-3.98166	0.0136581	0.0063699	0.0485815	0.0241001	4	2.40262	0.0966032	0.0740182	0.0824934	Not Significant	Not Significant	2.19587	1.86461
P05531	X-linked lymphocyte-regulated protein PM1	Xlr	13459000	14047000	7453400	20216000	34091000	25972000	-1.22235	-3.3339	-3.71691	0.0290001	0.0087923	0.063419	0.0277436	4	2.40262	0.0966032	0.20164	0.162224	Not Significant	Not Significant	2.0559	1.5376
P06151	L-lactate dehydrogenase A chain	Ldha	1103000000	991360000	1082000000	1331600000	1168600000	1039700000	-0.150498	-1.32631	-0.838547	0.255397	0.43191	0.228108	0.313014	4	2.40262	0.0966032	0.0193136	0.048317	Not Significant	Not Significant	0.364606	0.592784
P06683	Complement component C9	C9	0	8010700	5283000	0	7729900	10657000	-0.519586	-1.44286	-1.60208	0.222533	0.157148	0.208382	0.160032	4	2.40262	0.0966032	0.194517	0.157774	Not Significant	Not Significant	0.803691	0.652605
P06728	Apolipoprotein A-IV	Apoa4	495460000	1527500000	1254300000	234240000	263770000	618470000	1.5449	2.31478	2.80915	0.081603	0.0287331	0.109385	0.0531444	4	2.40262	0.0966032	0.668151	0.453675	Not Significant	Not Significant	1.54162	1.08829
P06745	Glucose-6-phosphate isomerase	Gpi	865890000	681330000	648120000	890590000	944740000	1003600000	-0.380998	-2.75594	-2.00505	0.0510619	0.0887901	0.0824897	0.108297	4	2.40262	0.0966032	0.0286679	0.054161	Not Significant	Not Significant	1.05164	1.2919
P06797	Cathepsin L1;Cathepsin L1 heavy chain;Cathepsin L1 light chain	Ctsl	175510000	105260000	66289000	79584000	58670000	67288000	0.654229	1.53883	1.76696	0.198677	0.124546	0.193427	0.136555	4	2.40262	0.0966032	0.271125	0.205635	Not Significant	Not Significant	0.90467	0.701853
P06801	NADP-dependent malic enzyme	Me1	1491900000	1237500000	1838200000	1949700000	1681900000	1626000000	-0.217266	-1.18436	-1.02203	0.301837	0.343821	0.255163	0.270525	4	2.40262	0.0966032	0.0504787	0.0677872	Not Significant	Not Significant	0.463667	0.520228
P06909	Complement factor H	Cfh	25181000	38121000	37699000	16638000	0	15160000	1.43934	3.34355	3.8476	0.0287407	0.00748911	0.063419	0.026032	4	2.40262	0.0966032	0.277974	0.209914	Not Significant	Not Significant	2.12557	1.5415
P07214	SPARC	Sparc	80535000	37051000	26848000	37357000	17695000	16375000	0.962576	1.59294	1.91639	0.186392	0.100732	0.185759	0.118225	4	2.40262	0.0966032	0.547722	0.378437	Not Significant	Not Significant	0.996833	0.729572
P07309	Transthyretin	Ttr	815640000	1966000000	1270900000	398760000	618470000	1788400000	0.736027	0.994885	1.21644	0.376102	0.26675	0.295028	0.228217	4	2.40262	0.0966032	0.82098	0.549154	Not Significant	Not Significant	0.573895	0.424694
P07310	Creatine kinase M-type	Ckm	0	12394000	19350000	0	0	21626000	0.344259	0.668758	0.790368	0.540265	0.457581	0.364768	0.323637	4	2.40262	0.0966032	0.397488	0.284579	Not Significant	Not Significant	0.339532	0.267393
P07356	Annexin A2	Anxa2	1571800000	2281900000	1807900000	852690000	778200000	886930000	1.15392	6.92998	5.66513	0.00227625	0.00104107	0.0256217	0.0111424	4	2.40262	0.0966032	0.0415893	0.0622336	Not Significant	Not Significant	2.98252	2.64278
P07724	Serum albumin	Alb	19479000000	46003000000	32332000000	8447700000	7967400000	17784000000	1.53241	2.95741	3.4981	0.0416614	0.0115689	0.0742057	0.0318514	4	2.40262	0.0966032	0.402731	0.287855	Not Significant	Not Significant	1.93671	1.38027
P07742	Ribonucleoside-diphosphate reductase large subunit	Rrm1	16996000	21345000	14655000	24063000	25459000	23146000	-0.471756	-2.89885	-2.33804	0.0441689	0.0553448	0.0760072	0.0807259	4	2.40262	0.0966032	0.039726	0.0610695	Not Significant	Not Significant	1.25692	1.35488
P07759	Serine protease inhibitor A3K	Serpina3k	1442700000	3677300000	1383000000	1556800000	1334400000	3728600000	-0.0260632	-0.039976	-0.048421	0.970028	0.962856	0.500986	0.490573	4	2.40262	0.0966032	0.637599	0.434587	Not Significant	Not Significant	0.0164386	0.0132157
P07901	Heat shock protein HSP 90-alpha	Hsp90aa1	8271500000	6662200000	5836600000	11833000000	12707000000	12353000000	-0.84327	-5.63587	-4.31715	0.00487798	0.00429928	0.0333286	0.019966	4	2.40262	0.0966032	0.0335817	0.0572308	Not Significant	Not Significant	2.3666	2.31176
P07978	Protamine-2;PP2-A;PP2-C;PP2-D;PP2-B	Prm2	24790000	15657000	0	84460000	0	0	-0.13137	-0.0998615	-0.124953	0.925259	0.904393	0.490031	0.475476	4	2.40262	0.0966032	2.59588	1.65801	Not Significant	Not Significant	0.043643	0.0337366
P08003	Protein disulfide-isomerase A4	Pdia4	442770000	491980000	356440000	449020000	456020000	350910000	0.0372795	0.202994	0.175275	0.849047	0.866276	0.469535	0.464884	4	2.40262	0.0966032	0.0505898	0.0678566	Not Significant	Not Significant	0.0623435	0.0710682
P08030	Adenine phosphoribosyltransferase	Aprt	50875000	39165000	21118000	19945000	20876000	21421000	0.746032	1.97751	2.21849	0.119141	0.0655486	0.137061	0.0905616	4	2.40262	0.0966032	0.213487	0.169626	Not Significant	Not Significant	1.18344	0.923938
P08074	Carbonyl reductase [NADPH] 2	Cbr2	55202000	46426000	46775000	27285000	14634000	14114000	1.47028	4.60547	4.96082	0.00998968	0.00211791	0.0424704	0.0153489	4	2.40262	0.0966032	0.152877	0.13176	Not Significant	Not Significant	2.67409	2.00045
P08101	Low affinity immunoglobulin gamma Fc region receptor II	Fcgr2	51313000	58923000	41488000	5744700	0	0	2.8112	9.85507	10.2649	0.000594667	3.27838e-05	0.0186422	0.00252299	4	2.40262	0.0966032	0.122055	0.112504	Significant	Significant	4.48434	3.22573
P08113	Endoplasmin	Hsp90b1	5357000000	4353800000	4802900000	6802600000	6658800000	6484200000	-0.463557	-5.22711	-2.71832	0.0063963	0.0325465	0.036754	0.0576746	4	2.40262	0.0966032	0.0117971	0.043621	Not Significant	Not Significant	1.4875	2.19407
P08121	Collagen alpha-1(III) chain	Col3a1	35371000	25946000	34168000	20280000	0	8418000	1.61805	3.08849	3.65817	0.0366279	0.0094578	0.0698307	0.0288397	4	2.40262	0.0966032	0.411701	0.293459	Not Significant	Not Significant	2.02421	1.43619
P08122	Collagen alpha-2(IV) chain;Canstatin	Col4a2	24444000	0	87729000	13520000	0	0	1.89313	2.11682	2.61563	0.101706	0.0375126	0.124919	0.063615	4	2.40262	0.0966032	1.19973	0.785773	Not Significant	Not Significant	1.42582	0.992656
P08207	Protein S100-A10	S100a10	129440000	157410000	153450000	43585000	44016000	73247000	1.49191	5.67908	5.75164	0.00474467	0.000958216	0.032762	0.0107542	4	2.40262	0.0966032	0.103519	0.100924	Not Significant	Not Significant	3.01854	2.32379
P08226	Apolipoprotein E	Apoe	161040000	359650000	447310000	34252000	50140000	65385000	2.61665	4.99787	5.91925	0.00750175	0.000818038	0.0382496	0.00986607	4	2.40262	0.0966032	0.411164	0.293123	Significant	Significant	3.08723	2.12484
P08228	Superoxide dismutase [Cu-Zn]	Sod1	1442400000	1611000000	1558900000	1904800000	2290900000	2704500000	-0.567987	-3.69974	-2.88012	0.0208401	0.0260851	0.0556936	0.0502494	4	2.40262	0.0966032	0.0353529	0.0583374	Not Significant	Not Significant	1.58361	1.6811
P08249	Malate dehydrogenase, mitochondrial	Mdh2	1493200000	1556500000	2211400000	1180800000	1303200000	1370800000	0.428277	2.24826	1.97892	0.087814	0.092155	0.115082	0.110125	4	2.40262	0.0966032	0.0544311	0.0702564	Not Significant	Not Significant	1.03548	1.05644
P08752	Guanine nucleotide-binding protein G(i) subunit alpha-2	Gnai2	376630000	580560000	397900000	254270000	260460000	298200000	0.713099	3.41409	3.14465	0.0269259	0.0182969	0.0614582	0.0404517	4	2.40262	0.0966032	0.0654395	0.0771338	Not Significant	Not Significant	1.73762	1.56983
P08775	DNA-directed RNA polymerase II subunit RPB1	Polr2a	10915000	0	0	15383000	0	0	-0.521281	-0.806066	-0.975684	0.465396	0.364632	0.333114	0.279948	4	2.40262	0.0966032	0.627328	0.428171	Not Significant	Not Significant	0.438146	0.332177
P09041	Phosphoglycerate kinase 2	Pgk2	503190000	223890000	208200000	1003300000	1390100000	1197000000	-2.0511	-4.76903	-5.4871	0.00884634	0.00123836	0.040609	0.0122782	4	2.40262	0.0966032	0.277461	0.209593	Significant	Significant	2.90715	2.05324
P09055	Integrin beta-1	Itgb1	68194000	161500000	117050000	51320000	50751000	75977000	0.901213	2.19664	2.50604	0.0930003	0.0437033	0.118663	0.0699308	4	2.40262	0.0966032	0.252481	0.193987	Not Significant	Not Significant	1.35949	1.03152
P09103	Protein disulfide-isomerase	P4hb	1480100000	1791800000	1796400000	1208700000	1090000000	1185600000	0.53627	5.19472	3.05443	0.00653981	0.0206275	0.0369031	0.0431263	4	2.40262	0.0966032	0.0159858	0.0462379	Not Significant	Not Significant	1.68555	2.18443
P09242	Alkaline phosphatase, tissue-nonspecific isozyme	Alpl	0	28714000	17868000	0	14117000	12487000	0.462921	0.580593	0.713171	0.592653	0.500897	0.385728	0.340306	4	2.40262	0.0966032	0.95359	0.632001	Not Significant	Not Significant	0.300252	0.227199
P09405	Nucleolin	Ncl	790360000	957400000	1099400000	700750000	818900000	761850000	0.309394	2.02798	1.57257	0.112471	0.163781	0.132498	0.1642	4	2.40262	0.0966032	0.034913	0.0580626	Not Significant	Not Significant	0.785737	0.94896
P09411	Phosphoglycerate kinase 1	Pgk1	853860000	621710000	933190000	653650000	671690000	625580000	0.283635	1.57283	1.3448	0.190863	0.224373	0.188256	0.203032	4	2.40262	0.0966032	0.0487802	0.0667261	Not Significant	Not Significant	0.64903	0.719278
P09470	Angiotensin-converting enzyme;Angiotensin-converting enzyme, soluble form	Ace	360160000	290590000	356020000	568640000	742020000	605040000	-0.925474	-6.02923	-4.69311	0.00381396	0.00282276	0.0300573	0.0171278	4	2.40262	0.0966032	0.0353424	0.0583309	Not Significant	Not Significant	2.54933	2.41862
P09528	Ferritin heavy chain;Ferritin heavy chain, N-terminally processed	Fth1	3776900000	3320800000	3490900000	324510000	434530000	553760000	3.04371	13.2714	12.7456	0.000186306	8.68378e-06	0.0170097	0.00116575	4	2.40262	0.0966032	0.0788982	0.0855421	Significant	Significant	5.06129	3.72977
P09541	Myosin light chain 4	Myl4	12458000	11442000	12713000	12943000	23210000	21644000	-0.61439	-2.27798	-2.32863	0.0849753	0.0560849	0.112529	0.0813648	4	2.40262	0.0966032	0.109113	0.104419	Not Significant	Not Significant	1.25115	1.07071
P09671	Superoxide dismutase [Mn], mitochondrial	Sod2	426490000	319290000	223230000	531830000	453060000	440670000	-0.601485	-2.12508	-2.20787	0.100764	0.0665436	0.123925	0.0910171	4	2.40262	0.0966032	0.120168	0.111325	Not Significant	Not Significant	1.17689	0.996695
P09813	Apolipoprotein A-II;Proapolipoprotein A-II	Apoa2	1142800000	2365500000	1330900000	395320000	335030000	799560000	1.69546	3.38986	3.99124	0.0275337	0.00629731	0.0619845	0.0241001	4	2.40262	0.0966032	0.375237	0.270678	Not Significant	Not Significant	2.20085	1.56014
P0C0A3	Charged multivesicular body protein 6	Chmp6	7443200	0	0	9753900	0	0	0.217916	0.655543	0.713793	0.547907	0.500537	0.366773	0.340306	4	2.40262	0.0966032	0.165755	0.139805	Not Significant	Not Significant	0.300564	0.261293
Q3THW5	Histone H2A.V;Histone H2A.Z	H2afv	466540000	146620000	360930000	751010000	242730000	174510000	-0.121898	-0.149732	-0.184138	0.888223	0.8596	0.478668	0.46292	4	2.40262	0.0966032	0.994153	0.657343	Not Significant	Not Significant	0.0657038	0.0514781
P0C7N9	Proteasome assembly chaperone 4	Psmg4	0	3492900	0	0	6482300	0	-0.0761571	-0.138155	-0.164624	0.896794	0.874315	0.481472	0.466742	4	2.40262	0.0966032	0.455806	0.321013	Not Significant	Not Significant	0.0583321	0.0473074
P0C913	Overexpressed in colon carcinoma 1 protein homolog	NA	3492600	0	0	4916200	0	0	-0.223801	-0.433265	-0.512275	0.687163	0.625647	0.419896	0.389699	4	2.40262	0.0966032	0.400228	0.286291	Not Significant	Not Significant	0.203671	0.16294
P0CW70	Probable C-mannosyltransferase DPY19L2	Dpy19l2	7789800	0	0	10695000	0	0	-0.752563	-3.18779	-3.09863	0.0332865	0.0194481	0.0677854	0.0416853	4	2.40262	0.0966032	0.0835984	0.0884785	Not Significant	Not Significant	1.71112	1.47773
P0DP28	Calmodulin-like protein 3	Calm3	1903700000	1703800000	1963700000	2834000000	4135800000	4481200000	-1.01458	-4.76132	-4.42654	0.00889656	0.00379583	0.0406423	0.0189929	4	2.40262	0.0966032	0.0681103	0.0788024	Not Significant	Not Significant	2.42069	2.05078
P0DP43		Catspere	7935500	0	0	13588000	0	0	-0.0182779	-0.0498101	-0.0555431	0.962662	0.957399	0.498435	0.489026	4	2.40262	0.0966032	0.20198	0.162437	Not Significant	Not Significant	0.0189071	0.0165263
P10107	Annexin A1	Anxa1	672620000	483980000	515170000	73590000	44871000	106470000	2.96597	7.61735	8.6021	0.00159447	9.4976e-05	0.0225207	0.00356961	4	2.40262	0.0966032	0.227414	0.178326	Significant	Significant	4.02239	2.79738
P10126	Elongation factor 1-alpha 1	Eef1a1	3560000000	3230900000	2968000000	4277100000	4008500000	4107800000	-0.348252	-4.32287	-2.07301	0.0124193	0.0806031	0.0468113	0.101786	4	2.40262	0.0966032	0.00973497	0.0423328	Not Significant	Not Significant	1.09365	1.9059
P10493	Nidogen-1	Nid1	159460000	154290000	240570000	87766000	22968000	13246000	2.59741	3.10716	3.82659	0.0359707	0.00768334	0.0693989	0.0264197	4	2.40262	0.0966032	1.04821	0.691111	Significant	Significant	2.11445	1.44405
P10518	Delta-aminolevulinic acid dehydratase	Alad	335700000	415220000	204420000	295370000	337890000	393090000	-0.153784	-0.472504	-0.511633	0.661194	0.626072	0.411643	0.389699	4	2.40262	0.0966032	0.158892	0.135518	Not Significant	Not Significant	0.203375	0.179671
P10605	Cathepsin B;Cathepsin B light chain;Cathepsin B heavy chain	Ctsb	2645800000	1220800000	1691500000	241070000	134310000	106990000	3.54104	7.44097	8.70031	0.00174209	8.87654e-05	0.0233274	0.00356708	4	2.40262	0.0966032	0.339699	0.248476	Significant	Significant	4.05176	2.75893
P10630	Eukaryotic initiation factor 4A-II;Eukaryotic initiation factor 4A-II, N-terminally processed	Eif4a2	181620000	152780000	156530000	243540000	257080000	262290000	-0.639574	-7.5891	-3.78159	0.00161704	0.00811859	0.0225207	0.0269973	4	2.40262	0.0966032	0.0106535	0.0429066	Not Significant	Not Significant	2.09052	2.79128
P10639	Thioredoxin	Txn	470250000	531780000	601210000	150630000	185630000	251500000	1.47271	6.19212	6.03719	0.00345793	0.00073331	0.0285565	0.00948429	4	2.40262	0.0966032	0.0848489	0.0892598	Not Significant	Not Significant	3.13471	2.46118
P10648	Glutathione S-transferase A2	Gsta2	99710000	112040000	64114000	138740000	178940000	195130000	-0.919253	-3.21106	-3.34843	0.0325562	0.014016	0.0671443	0.0351975	4	2.40262	0.0966032	0.122932	0.113052	Not Significant	Not Significant	1.85338	1.48737
P10649	Glutathione S-transferase Mu 1	Gstm1	3034200000	1801500000	2569500000	6041800000	3350000000	5041600000	-0.953673	-2.84297	-3.10283	0.0467268	0.0193397	0.0782467	0.0416853	4	2.40262	0.0966032	0.168789	0.141701	Not Significant	Not Significant	1.71355	1.33043
P10711	Transcription elongation factor A protein 1	Tcea1	26111000	27192000	24347000	15316000	19147000	21280000	0.489976	3.32407	2.52212	0.0292671	0.0427314	0.0637052	0.0687917	4	2.40262	0.0966032	0.0325912	0.0566121	Not Significant	Not Significant	1.36925	1.53362
P10852	4F2 cell-surface antigen heavy chain	Slc3a2	434460000	502510000	625630000	775930000	743050000	753210000	-0.556251	-3.6119	-2.81724	0.0225186	0.0284172	0.0574554	0.0527243	4	2.40262	0.0966032	0.0355764	0.058477	Not Significant	Not Significant	1.54642	1.64746
Q8CGP2	Histone H2B type 1-P;Histone H2B type 1-K;Histone H2B type 1-C/E/G;Histone H2B type 2-B;Histone H2B type 1-H;Histone H2B type 1-B;Histone H2B type 1-M;Histone H2B type 1-F/J/L	Hist1h2bp	365430000	370390000	744040000	359270000	185480000	235690000	0.893599	2.03688	2.3515	0.111338	0.0543032	0.13173	0.0797102	4	2.40262	0.0966032	0.2887	0.216615	Not Significant	Not Significant	1.26517	0.953355
P10922	Histone H1.0;Histone H1.0, N-terminally processed	H1f0	0	122500000	136890000	0	18101000	17705000	1.93887	1.20286	1.51062	0.295358	0.178563	0.251412	0.17458	4	2.40262	0.0966032	3.89722	2.47102	Not Significant	Not Significant	0.748209	0.529652
P11031	Activated RNA polymerase II transcriptional coactivator p15	Sub1	48630000	0	0	74800000	0	0	-0.654799	-0.526057	-0.657396	0.626665	0.533835	0.397801	0.352861	4	2.40262	0.0966032	2.32403	1.48817	Not Significant	Not Significant	0.272593	0.202964
P11087	Collagen alpha-1(I) chain	Col1a1	1440000000	2798300000	4827700000	339910000	85797000	196180000	3.91047	5.10038	6.25046	0.00698076	0.000604141	0.0374819	0.00871758	4	2.40262	0.0966032	0.881747	0.587118	Significant	Significant	3.21886	2.1561
P11103	Poly [ADP-ribose] polymerase 1	Parp1	115300000	127340000	142280000	133000000	154930000	127450000	-0.110054	-0.898964	-0.601017	0.419496	0.568484	0.313078	0.366033	4	2.40262	0.0966032	0.0224813	0.0502959	Not Significant	Not Significant	0.245282	0.377273
P11276	Fibronectin;Anastellin	Fn1	232500000	241610000	292930000	16830000	5868200	11267000	4.61737	10.1531	11.79	0.00052989	1.40473e-05	0.0186422	0.00141889	4	2.40262	0.0966032	0.310232	0.230067	Significant	Significant	4.85241	3.27581
P11352	Glutathione peroxidase 1	Gpx1	77171000	89431000	99208000	31342000	27936000	37264000	1.46376	9.14013	7.30148	0.000795161	0.000248931	0.0192234	0.00543655	4	2.40262	0.0966032	0.0384704	0.0602851	Not Significant	Not Significant	3.60392	3.09954
P11404	Fatty acid-binding protein, heart	Fabp3	144990000	193580000	441290000	518460000	603850000	759280000	-1.42081	-2.80262	-3.30573	0.0486812	0.0148137	0.0800271	0.0361098	4	2.40262	0.0966032	0.385511	0.277097	Not Significant	Not Significant	1.82934	1.31264
P11438	Lysosome-associated membrane glycoprotein 1	Lamp1	281230000	97759000	152590000	36967000	83273000	80711000	1.35921	2.32375	2.78662	0.0808036	0.0296323	0.108668	0.0541925	4	2.40262	0.0966032	0.513202	0.356871	Not Significant	Not Significant	1.52823	1.09257
P11440	Cyclin-dependent kinase 1	Cdk1	33000000	31360000	40943000	42596000	46350000	42599000	-0.329699	-2.64404	-1.79117	0.0573378	0.120344	0.0875914	0.133347	4	2.40262	0.0966032	0.0233234	0.0508221	Not Significant	Not Significant	0.919574	1.24156
P11499	Heat shock protein HSP 90-beta	Hsp90ab1	2283700000	2526800000	2262800000	2411700000	2319500000	2230300000	0.0218972	0.361869	0.134628	0.735757	0.897039	0.435569	0.474233	4	2.40262	0.0966032	0.00549245	0.0396823	Not Significant	Not Significant	0.0471886	0.133266
P11859	Angiotensinogen;Angiotensin-1;Angiotensin-2;Angiotensin-3;Angiotensin-4;Angiotensin 1-9;Angiotensin 1-7;Angiotensin 1-5;Angiotensin 1-4	Agt	0	46349000	28425000	0	17494000	20613000	0.269767	0.213807	0.267274	0.841154	0.797661	0.467009	0.445786	4	2.40262	0.0966032	2.38795	1.52811	Not Significant	Not Significant	0.0981819	0.0751245
P11881	Inositol 1,4,5-trisphosphate receptor type 1	Itpr1	15463000	25844000	23199000	12592000	17602000	12789000	0.569854	2.07143	2.1319	0.107056	0.0741259	0.128608	0.0964202	4	2.40262	0.0966032	0.113521	0.107172	Not Significant	Not Significant	1.13003	0.970389
P11983	T-complex protein 1 subunit alpha	Tcp1	1026300000	708930000	754760000	1729500000	1458100000	1285900000	-0.853989	-4.13987	-3.79075	0.0143781	0.00802782	0.0485815	0.0268209	4	2.40262	0.0966032	0.0638296	0.0761281	Not Significant	Not Significant	2.0954	1.8423
P11985	Tctex1 domain-containing protein 3	Tcte3	0	10102000	0	0	28782000	23419000	-1.2785	-1.80556	-2.20101	0.145296	0.0671947	0.156269	0.0911768	4	2.40262	0.0966032	0.752094	0.506117	Not Significant	Not Significant	1.17266	0.837747
P12265	Beta-glucuronidase	Gusb	79936000	65339000	97313000	8237700	4249500	8558700	3.57609	9.73151	10.855	0.000624396	2.33172e-05	0.0186422	0.00198335	4	2.40262	0.0966032	0.202558	0.162798	Significant	Significant	4.63232	3.20454
P12367	cAMP-dependent protein kinase type II-alpha regulatory subunit	Prkar2a	91386000	76530000	80782000	135210000	140500000	134660000	-0.726282	-9.28604	-4.34122	0.000748129	0.0041824	0.0192234	0.0196491	4	2.40262	0.0966032	0.00917572	0.0419834	Not Significant	Not Significant	2.37857	3.12602
P12382	ATP-dependent 6-phosphofructokinase, liver type	Pfkl	94206000	154760000	104230000	77547000	90933000	80551000	0.473234	2.06458	1.98231	0.107891	0.0917107	0.129167	0.109953	4	2.40262	0.0966032	0.0788094	0.0854866	Not Significant	Not Significant	1.03758	0.967017
P12787	Cytochrome c oxidase subunit 5A, mitochondrial	Cox5a	694780000	224050000	403490000	756060000	360700000	388280000	-0.251163	-0.432282	-0.518034	0.68782	0.621844	0.419896	0.388746	4	2.40262	0.0966032	0.506368	0.352601	Not Significant	Not Significant	0.206318	0.162525
P12804	Fibroleukin	Fgl2	43276000	68947000	36194000	14620000	0	5348600	2.58622	4.91485	5.82456	0.00795869	0.000894138	0.0389121	0.010396	4	2.40262	0.0966032	0.415337	0.295731	Significant	Significant	3.0486	2.09916
P12815	Programmed cell death protein 6	Pdcd6	58941000	70610000	68734000	43952000	60472000	52935000	0.34125	2.18421	1.71882	0.0943003	0.133325	0.119439	0.143458	4	2.40262	0.0966032	0.0366142	0.0591254	Not Significant	Not Significant	0.875087	1.02549
P12970	60S ribosomal protein L7a	Rpl7a	249480000	288130000	294110000	304750000	302720000	261700000	-0.0638414	-0.616655	-0.363397	0.570829	0.728008	0.377049	0.423983	4	2.40262	0.0966032	0.0160773	0.0462951	Not Significant	Not Significant	0.137864	0.243494
P13439	Uridine 5-monophosphate synthase;Orotate phosphoribosyltransferase;Orotidine 5-phosphate decarboxylase	Umps	33567000	33083000	38857000	23254000	29343000	36466000	0.264754	1.31371	1.18949	0.259223	0.276482	0.229777	0.23382	4	2.40262	0.0966032	0.060922	0.0743116	Not Significant	Not Significant	0.558333	0.586326
P13707	Glycerol-3-phosphate dehydrogenase [NAD(+)], cytoplasmic	Gpd1	239190000	293150000	228380000	377050000	404860000	431690000	-0.680314	-5.47859	-3.70038	0.00540363	0.00897426	0.0345537	0.0279991	4	2.40262	0.0966032	0.0231298	0.0507011	Not Significant	Not Significant	2.047	2.26731
P14069	Protein S100-A6	S100a6	123140000	415870000	432690000	67544000	87372000	165990000	1.49984	2.1151	2.57861	0.101903	0.0394939	0.125069	0.0660236	4	2.40262	0.0966032	0.754261	0.507472	Not Significant	Not Significant	1.40347	0.991812
P14094	Sodium/potassium-transporting ATPase subunit beta-1	Atp1b1	23030000	32033000	26714000	15314000	18493000	20474000	0.588349	3.19026	2.76079	0.0332079	0.0307004	0.0677704	0.0554227	4	2.40262	0.0966032	0.0510162	0.068123	Not Significant	Not Significant	1.51286	1.47876
P14115	60S ribosomal protein L27a	Rpl27a	115010000	109540000	110750000	160800000	115700000	114770000	-0.204626	-1.26565	-1.01682	0.274337	0.346111	0.239118	0.271203	4	2.40262	0.0966032	0.0392089	0.0607465	Not Significant	Not Significant	0.460785	0.561715
P14131	40S ribosomal protein S16	Rps16	118980000	129270000	173470000	170280000	150740000	147160000	-0.167188	-0.942252	-0.798526	0.399415	0.45316	0.305017	0.32206	4	2.40262	0.0966032	0.0472246	0.0657542	Not Significant	Not Significant	0.343748	0.398576
P14148	60S ribosomal protein L7	Rpl7	409270000	391750000	464660000	439000000	355400000	303490000	0.217949	1.27428	1.05792	0.271562	0.328366	0.237385	0.261419	4	2.40262	0.0966032	0.0438805	0.063665	Not Significant	Not Significant	0.483642	0.566131
P14152	Malate dehydrogenase, cytoplasmic	Mdh1	502520000	751490000	891610000	497190000	500280000	618650000	0.376564	1.41455	1.4394	0.230109	0.197079	0.21365	0.186226	4	2.40262	0.0966032	0.1063	0.102661	Not Significant	Not Significant	0.705359	0.638066
P14206	40S ribosomal protein SA	Rpsa	580520000	609710000	632660000	511810000	631990000	577170000	0.0874643	0.919004	0.506445	0.410097	0.62951	0.309578	0.390728	4	2.40262	0.0966032	0.0135868	0.0447392	Not Significant	Not Significant	0.200998	0.387114
P14211	Calreticulin	Calr	4814400000	3257100000	1515400000	6018500000	4183500000	4284600000	-0.727544	-1.40387	-1.66057	0.233031	0.144746	0.215147	0.152198	4	2.40262	0.0966032	0.40286	0.287935	Not Significant	Not Significant	0.839392	0.632586
P14576	Signal recognition particle 54 kDa protein	Srp54	27012000	23272000	30981000	24340000	24482000	25629000	0.116917	0.962289	0.639841	0.390398	0.54448	0.300808	0.357412	4	2.40262	0.0966032	0.022143	0.0500846	Not Significant	Not Significant	0.264018	0.408493
P14602	Heat shock protein beta-1	Hspb1	287690000	418930000	396110000	291150000	332150000	369940000	0.138746	0.707079	0.631823	0.518534	0.549385	0.354474	0.358448	4	2.40262	0.0966032	0.0577555	0.0723333	Not Significant	Not Significant	0.260123	0.285223
P14685	26S proteasome non-ATPase regulatory subunit 3	Psmd3	145990000	147640000	154710000	220200000	203730000	171810000	-0.402922	-3.70393	-2.26804	0.0207639	0.0611027	0.0556936	0.0859365	4	2.40262	0.0966032	0.0177504	0.0473403	Not Significant	Not Significant	1.21394	1.68269
P14733	Lamin-B1	Lmnb1	433710000	556120000	812980000	278480000	301430000	280440000	1.01942	3.8311	3.8978	0.0186005	0.00704637	0.0536917	0.0249187	4	2.40262	0.0966032	0.106206	0.102603	Not Significant	Not Significant	2.15203	1.73047
P14824	Annexin A6	Anxa6	442870000	648870000	670720000	156070000	152900000	169160000	1.85912	9.42634	8.44455	0.000706118	0.000106008	0.0192234	0.00369071	4	2.40262	0.0966032	0.058347	0.0727029	Not Significant	Not Significant	3.97466	3.15112
P14869	60S acidic ribosomal protein P0	Rplp0	444100000	492180000	636520000	446870000	508700000	475810000	0.121074	0.740041	0.598748	0.500357	0.569906	0.346079	0.366656	4	2.40262	0.0966032	0.0401493	0.061334	Not Significant	Not Significant	0.244197	0.30072
P14873	Microtubule-associated protein 1B;MAP1B heavy chain;MAP1 light chain LC1	Map1b	73111000	93282000	77096000	117530000	81410000	37104000	0.188868	0.376168	0.44313	0.725893	0.672254	0.432377	0.404316	4	2.40262	0.0966032	0.378134	0.272488	Not Significant	Not Significant	0.172466	0.139127
P14901	Heme oxygenase 1	Hmox1	44179000	38479000	47755000	25051000	13806000	15841000	1.29642	4.70809	4.84707	0.00925277	0.00238996	0.0412085	0.0159254	4	2.40262	0.0966032	0.113735	0.107306	Not Significant	Not Significant	2.62161	2.03373
P15105	Glutamine synthetase	Glul	320030000	380380000	438220000	739400000	682770000	705830000	-0.913257	-6.75057	-4.84015	0.00251063	0.00240773	0.0270723	0.0159475	4	2.40262	0.0966032	0.0274534	0.0534023	Not Significant	Not Significant	2.61839	2.60022
P15265	Sperm mitochondrial-associated cysteine-rich protein	Smcp	33599000	18007000	0	110980000	390590000	158160000	-3.32385	-4.70096	-5.72995	0.0093018	0.000978262	0.0413011	0.0108287	4	2.40262	0.0966032	0.749899	0.504746	Significant	Significant	3.00954	2.03143
P15327	Bisphosphoglycerate mutase	Bpgm	20495000	28432000	21449000	34885000	46264000	45624000	-0.852864	-4.29774	-3.86192	0.0126683	0.0073597	0.0472816	0.025857	4	2.40262	0.0966032	0.0590706	0.0731549	Not Significant	Not Significant	2.13314	1.89728
P15532	Nucleoside diphosphate kinase A	Nme1	219550000	112950000	168750000	250130000	166030000	112540000	-0.0531462	-0.122446	-0.141104	0.908451	0.892123	0.485083	0.472252	4	2.40262	0.0966032	0.282582	0.212793	Not Significant	Not Significant	0.049575	0.0416985
P15626	Glutathione S-transferase Mu 2	Gstm2	7511700000	6061300000	4363700000	15155000000	8998800000	12205000000	-1.02218	-3.24062	-3.47902	0.0316554	0.0118532	0.0664146	0.0321954	4	2.40262	0.0966032	0.149241	0.129489	Not Significant	Not Significant	1.92616	1.49955
P15864	Histone H1.2	Hist1h1c	1031400000	1022200000	1453400000	808180000	604400000	504200000	0.879107	3.39031	3.41745	0.0275221	0.0128238	0.0619845	0.033699	4	2.40262	0.0966032	0.100855	0.0992592	Not Significant	Not Significant	1.89198	1.56032
P16015	Carbonic anhydrase 3	Ca3	0	672980000	310100000	0	21084000	122160000	2.12058	0.950592	1.19801	0.39564	0.273372	0.303403	0.232234	4	2.40262	0.0966032	7.4647	4.69978	Not Significant	Not Significant	0.563246	0.402699
P16045	Galectin-1	Lgals1	1122200000	796900000	879890000	423430000	360270000	454210000	1.16847	6.60236	5.58733	0.00272704	0.00112256	0.02801	0.0116418	4	2.40262	0.0966032	0.0469818	0.0656025	Not Significant	Not Significant	2.94979	2.56431
P16110	Galectin-3	Lgals3	1474400000	947350000	870420000	0	5388700	9248800	7.05144	18.7262	20.9998	4.7879e-05	3.80169e-07	0.00983551	0.000307201	4	2.40262	0.0966032	0.212691	0.169129	Significant	Significant	6.42002	4.31985
P16125	L-lactate dehydrogenase B chain	Ldhb	1435800000	1609700000	1380000000	1624800000	1623000000	1666100000	-0.154028	-2.27436	-0.936821	0.0853155	0.382829	0.112888	0.287902	4	2.40262	0.0966032	0.00687976	0.040549	Not Significant	Not Significant	0.416995	1.06897
P16254	Signal recognition particle 14 kDa protein;Signal recognition particle 14 kDa protein, N-terminally processed	Srp14	0	10395000	20855000	0	9923300	9136500	0.697921	2.32675	2.46172	0.0805384	0.046502	0.108467	0.0724717	4	2.40262	0.0966032	0.13496	0.120566	Not Significant	Not Significant	1.33253	1.094
P16330	2,3-cyclic-nucleotide 3-phosphodiesterase	Cnp	0	6383400	5728100	0	5007500	4208100	0.155998	0.359375	0.414142	0.737483	0.692289	0.435922	0.410986	4	2.40262	0.0966032	0.28264	0.212828	Not Significant	Not Significant	0.159713	0.132248
P16332	Methylmalonyl-CoA mutase, mitochondrial	Mut	35672000	44115000	61369000	31140000	34145000	30111000	0.530946	2.26821	2.19708	0.0858974	0.0675708	0.113236	0.0914599	4	2.40262	0.0966032	0.0821913	0.0875994	Not Significant	Not Significant	1.17024	1.06602
P16381	Putative ATP-dependent RNA helicase Pl10	D1Pas1	311580000	202030000	218690000	326520000	282130000	273910000	-0.291391	-1.40424	-1.28944	0.23293	0.241867	0.215147	0.213904	4	2.40262	0.0966032	0.0645894	0.0766028	Not Significant	Not Significant	0.616423	0.632775
P16460	Argininosuccinate synthase	Ass1	143830000	143770000	252190000	1684600000	1141600000	1224000000	-2.9394	-9.16574	-9.88521	0.000786648	4.12063e-05	0.0192234	0.00256723	4	2.40262	0.0966032	0.154268	0.132629	Significant	Significant	4.38504	3.10422
P16546	Spectrin alpha chain, non-erythrocytic 1	Sptan1	765700000	1450100000	1401500000	492380000	514570000	569290000	1.14382	3.74296	3.98203	0.0200693	0.00636707	0.055235	0.0241001	4	2.40262	0.0966032	0.14008	0.123765	Not Significant	Not Significant	2.19606	1.69747
P16627	Heat shock 70 kDa protein 1-like	Hspa1l	293300000	131020000	257260000	615170000	583190000	393230000	-1.27831	-3.08976	-3.53044	0.0365827	0.0111039	0.0698256	0.0311203	4	2.40262	0.0966032	0.256752	0.196655	Not Significant	Not Significant	1.95452	1.43672
P16675	Lysosomal protective protein;Lysosomal protective protein 32 kDa chain;Lysosomal protective protein 20 kDa chain	Ctsa	226020000	207750000	209480000	17443000	16244000	17307000	3.65666	72.3364	22.7814	2.18862e-07	2.27081e-07	0.000359676	0.000307201	4	2.40262	0.0966032	0.00383307	0.0386456	Significant	Significant	6.64382	6.65983
P16858	Glyceraldehyde-3-phosphate dehydrogenase	Gapdh	2134300000	2237600000	3359900000	1450600000	1359200000	1737200000	0.742654	3.18449	3.07985	0.0333915	0.01994	0.0678107	0.0422907	4	2.40262	0.0966032	0.0815801	0.0872176	Not Significant	Not Significant	1.70028	1.47636
P17047	Lysosome-associated membrane glycoprotein 2	Lamp2	155050000	208300000	240860000	66292000	90635000	89191000	1.28652	5.41374	5.27652	0.00564044	0.00152833	0.0349973	0.0130208	4	2.40262	0.0966032	0.0847098	0.0891729	Not Significant	Not Significant	2.81578	2.24869
P17095	High mobility group protein HMG-I/HMG-Y	Hmga1	24443000	17777000	0	31511000	20048000	10956000	0.252836	0.529797	0.619716	0.624296	0.556844	0.397801	0.361476	4	2.40262	0.0966032	0.341625	0.249679	Not Significant	Not Significant	0.254267	0.20461
P17156	Heat shock-related 70 kDa protein 2	Hspa2	9152400000	6108000000	7315100000	15123000000	17473000000	16198000000	-1.12925	-6.30285	-5.36998	0.00323908	0.00139112	0.0284036	0.012609	4	2.40262	0.0966032	0.0481499	0.0663323	Not Significant	Not Significant	2.85664	2.48958
P17182	Alpha-enolase	Eno1	2098000000	2403100000	2042600000	1743200000	1917400000	2061800000	0.193175	1.91404	1.10556	0.128148	0.308722	0.143851	0.250343	4	2.40262	0.0966032	0.0152788	0.0457963	Not Significant	Not Significant	0.510433	0.892288
P17225	Polypyrimidine tract-binding protein 1	Ptbp1	476680000	323030000	354390000	397900000	267540000	284200000	0.283653	1.15421	1.1401	0.312681	0.29509	0.261107	0.243473	4	2.40262	0.0966032	0.0905944	0.0928492	Not Significant	Not Significant	0.530045	0.504898
P17426	AP-2 complex subunit alpha-1	Ap2a1	169260000	239400000	171360000	160010000	211400000	202840000	0.00573833	0.0278295	0.0254775	0.979131	0.98045	0.502647	0.494857	4	2.40262	0.0966032	0.0637749	0.0760939	Not Significant	Not Significant	0.00857464	0.00915911
P17427	AP-2 complex subunit alpha-2	Ap2a2	98435000	162770000	157220000	53682000	53672000	62707000	1.26714	5.15879	5.09472	0.00670361	0.00184123	0.0372185	0.0144449	4	2.40262	0.0966032	0.0904988	0.0927895	Not Significant	Not Significant	2.73489	2.17369
P17439	Glucosylceramidase	Gba	22599000	29603000	20239000	15966000	17945000	13297000	0.609818	2.96176	2.70957	0.0414821	0.0329414	0.0741254	0.05803	4	2.40262	0.0966032	0.0635907	0.0759788	Not Significant	Not Significant	1.48226	1.38214
P17563	Selenium-binding protein 1;Selenium-binding protein 2	Selenbp1	257350000	461390000	354620000	365230000	404770000	447400000	-0.21716	-0.842431	-0.847344	0.44697	0.427337	0.326227	0.310676	4	2.40262	0.0966032	0.0996742	0.0985218	Not Significant	Not Significant	0.369229	0.349721
P17665	Cytochrome c oxidase subunit 7C, mitochondrial	Cox7c	121400000	61750000	186990000	114900000	81985000	82398000	0.28425	0.577434	0.678407	0.594591	0.521268	0.386583	0.348114	4	2.40262	0.0966032	0.363485	0.263336	Not Significant	Not Significant	0.282939	0.225782
P17710	Hexokinase-1	Hk1	271350000	199830000	191610000	351660000	568150000	463680000	-1.05216	-4.1189	-4.12902	0.0146256	0.0053485	0.0488695	0.0219387	4	2.40262	0.0966032	0.0978798	0.0974008	Not Significant	Not Significant	2.27177	1.83489
P17742	Peptidyl-prolyl cis-trans isomerase A;Peptidyl-prolyl cis-trans isomerase A, N-terminally processed	Ppia	2359200000	1894300000	2079600000	2301200000	2560400000	3290300000	-0.353569	-1.983	-1.68503	0.118394	0.139842	0.13654	0.148783	4	2.40262	0.0966032	0.0476863	0.0660426	Not Significant	Not Significant	0.854364	0.926669
P17751	Triosephosphate isomerase	Tpi1	929070000	1198600000	1213400000	1011700000	1014300000	1052700000	0.107635	0.848118	0.581771	0.444142	0.580614	0.325381	0.371476	4	2.40262	0.0966032	0.0241593	0.0513443	Not Significant	Not Significant	0.236112	0.352478
Q61696	Heat shock 70 kDa protein 1A;Heat shock 70 kDa protein 1B	Hspa1a	36217000	47205000	83007000	20408000	20269000	22569000	1.3087	3.67212	4.06755	0.0213512	0.00575064	0.0559669	0.0229107	4	2.40262	0.0966032	0.190517	0.155275	Not Significant	Not Significant	2.24028	1.67058
P17918	Proliferating cell nuclear antigen	Pcna	170950000	212770000	220090000	189850000	206040000	201590000	0.00725142	0.0606441	0.0398576	0.954552	0.969421	0.496897	0.491908	4	2.40262	0.0966032	0.0214466	0.0496496	Not Significant	Not Significant	0.0134877	0.0202005
P18242	Cathepsin D	Ctsd	3043200000	1546000000	3137900000	337270000	253830000	261100000	3.12245	8.72424	9.67326	0.000950884	4.69781e-05	0.0201541	0.00281195	4	2.40262	0.0966032	0.192144	0.156292	Significant	Significant	4.3281	3.02187
P18293	Atrial natriuretic peptide receptor 1	Npr1	0	5723600	0	0	6837700	5328700	-0.051489	-0.355972	-0.266822	0.739843	0.797994	0.436415	0.445786	4	2.40262	0.0966032	0.0313826	0.055857	Not Significant	Not Significant	0.0980005	0.130861
P18572	Basigin	Bsg	228850000	111700000	162560000	340520000	294340000	298250000	-0.948914	-3.0983	-3.29832	0.0362809	0.014957	0.0694536	0.0362405	4	2.40262	0.0966032	0.140701	0.124153	Not Significant	Not Significant	1.82516	1.44032
P18654	Ribosomal protein S6 kinase alpha-3	Rps6ka3	15905000	22493000	13243000	11975000	16976000	20082000	0.0715871	0.228129	0.244556	0.830733	0.81445	0.465119	0.45031	4	2.40262	0.0966032	0.147706	0.128529	Not Significant	Not Significant	0.0891354	0.0805385
P18760	Cofilin-1	Cfl1	2350400000	2817200000	1555000000	1619400000	1866800000	2068800000	0.239754	0.876288	0.900197	0.430346	0.400605	0.318141	0.296986	4	2.40262	0.0966032	0.112287	0.106402	Not Significant	Not Significant	0.397283	0.366183
P18872	Guanine nucleotide-binding protein G(o) subunit alpha	Gnao1	0	5751900	7485300	4276300	0	0	0.17279	0.3024	0.361757	0.777419	0.729175	0.449229	0.424267	4	2.40262	0.0966032	0.48974	0.342213	Not Significant	Not Significant	0.137168	0.109345
P19096	Fatty acid synthase;[Acyl-carrier-protein] S-acetyltransferase;[Acyl-carrier-protein] S-malonyltransferase;3-oxoacyl-[acyl-carrier-protein] synthase;3-oxoacyl-[acyl-carrier-protein] reductase;3-hydroxyacyl-[acyl-carrier-protein] dehydratase;Enoyl-[acyl-carrier-protein] reductase;Oleoyl-[acyl-carrier-protein] hydrolase	Fasn	853100000	1012200000	877750000	781690000	775050000	756760000	0.241742	3.11576	1.44654	0.0356726	0.195145	0.0693989	0.185674	4	2.40262	0.0966032	0.00902958	0.0418921	Not Significant	Not Significant	0.709643	1.44766
P19137	Laminin subunit alpha-1	Lama1	124660000	79312000	217860000	40259000	8385100	0	2.89275	3.70084	4.54065	0.0208202	0.00333962	0.0556936	0.0183495	4	2.40262	0.0966032	0.916462	0.608805	Significant	Significant	2.4763	1.68152
P19157	Glutathione S-transferase P 1	Gstp1	298560000	544270000	499300000	331040000	481120000	516860000	-0.00697519	-0.0207646	-0.0226706	0.984428	0.982603	0.504303	0.495431	4	2.40262	0.0966032	0.169261	0.141996	Not Significant	Not Significant	0.00762184	0.00681606
P19221	Prothrombin;Activation peptide fragment 1;Activation peptide fragment 2;Thrombin light chain;Thrombin heavy chain	F2	58032000	67122000	128640000	23053000	0	27871000	2.13976	3.50381	4.21949	0.0248104	0.00481215	0.0597848	0.0209624	4	2.40262	0.0966032	0.559423	0.385747	Significant	Significant	2.31766	1.60537
P19253	60S ribosomal protein L13a	Rpl13a	34091000	36216000	47043000	35730000	39631000	36485000	0.0563098	0.376168	0.288232	0.725893	0.782274	0.432377	0.442047	4	2.40262	0.0966032	0.0336121	0.0572499	Not Significant	Not Significant	0.106641	0.139127
P19324	Serpin H1	Serpinh1	149690000	321540000	289000000	22573000	18359000	69914000	2.96905	4.29255	5.22372	0.0127205	0.00161256	0.0472958	0.0132086	4	2.40262	0.0966032	0.717625	0.484583	Significant	Significant	2.79248	1.8955
P19536	Cytochrome c oxidase subunit 5B, mitochondrial	Cox5b	123240000	62916000	169370000	122420000	130610000	87716000	-0.0316229	-0.0691691	-0.0803875	0.948175	0.938383	0.495795	0.485236	4	2.40262	0.0966032	0.313524	0.232123	Not Significant	Not Significant	0.0276197	0.0231116
P19783	Cytochrome c oxidase subunit 4 isoform 1, mitochondrial	Cox4i1	307890000	146990000	287510000	275920000	247130000	246280000	-0.122692	-0.356114	-0.391276	0.739744	0.708285	0.436415	0.416387	4	2.40262	0.0966032	0.17805	0.147487	Not Significant	Not Significant	0.149792	0.130919
P20029	78 kDa glucose-regulated protein	Hspa5	3968100000	3516700000	3974000000	5219200000	5303600000	5080500000	-0.447503	-7.31554	-2.74873	0.00185744	0.0312132	0.0236628	0.0559873	4	2.40262	0.0966032	0.00561294	0.0397575	Not Significant	Not Significant	1.50566	2.73109
P20060	Beta-hexosaminidase subunit beta	Hexb	391590000	433390000	411260000	14749000	25070000	23407000	4.32578	17.7284	17.4627	5.94727e-05	1.21633e-06	0.0108597	0.000449544	4	2.40262	0.0966032	0.089306	0.0920443	Significant	Significant	5.91495	4.22568
P20108	Thioredoxin-dependent peroxide reductase, mitochondrial	Prdx3	298220000	463300000	535470000	258900000	361530000	323900000	0.429024	1.47528	1.54608	0.214167	0.169957	0.202859	0.168614	4	2.40262	0.0966032	0.126855	0.115503	Not Significant	Not Significant	0.769661	0.669248
P20152	Vimentin	Vim	6312400000	6162400000	8642000000	1942400000	1738800000	1532700000	2.00701	10.8137	9.38966	0.000414849	5.62119e-05	0.0186422	0.00294426	4	2.40262	0.0966032	0.0516705	0.0685317	Significant	Significant	4.25017	3.38211
P20491	High affinity immunoglobulin epsilon receptor subunit gamma	Fcer1g	29676000	30543000	25129000	0	0	5442100	2.11592	10.1372	9.33423	0.000533102	5.82509e-05	0.0186422	0.00294426	4	2.40262	0.0966032	0.0653507	0.0770783	Significant	Significant	4.2347	3.27319
P20918	Plasminogen;Plasmin heavy chain A;Activation peptide;Angiostatin;Plasmin heavy chain A, short form;Plasmin light chain B	Plg	125830000	304930000	300760000	42621000	43352000	93180000	2.02222	3.59227	4.2905	0.0229155	0.00443293	0.0577594	0.0201241	4	2.40262	0.0966032	0.475348	0.333222	Significant	Significant	2.35331	1.63987
P21107	Tropomyosin alpha-3 chain	Tpm3	169840000	311860000	445050000	108560000	145970000	165270000	1.05668	2.38087	2.75391	0.0759175	0.030992	0.104666	0.0557142	4	2.40262	0.0966032	0.295468	0.220843	Not Significant	Not Significant	1.50875	1.11966
P21126	Ubiquitin-like protein 4A	Ubl4a	0	19548000	34996000	0	23161000	19458000	0.447497	0.671551	0.814872	0.53866	0.444393	0.364293	0.319169	4	2.40262	0.0966032	0.666061	0.452369	Not Significant	Not Significant	0.352233	0.268685
P21278	Guanine nucleotide-binding protein subunit alpha-11	Gna11	41584000	70574000	47704000	31848000	44076000	40942000	0.428166	1.59125	1.6253	0.186765	0.15211	0.185986	0.156779	4	2.40262	0.0966032	0.108603	0.1041	Not Significant	Not Significant	0.817843	0.728704
P21279	Guanine nucleotide-binding protein G(q) subunit alpha	Gnaq	21111000	30773000	30776000	12987000	0	14178000	1.0679	5.42291	4.85439	0.00560618	0.00237132	0.0349973	0.0159019	4	2.40262	0.0966032	0.0581688	0.0725915	Not Significant	Not Significant	2.62501	2.25133
P21460	Cystatin-C	Cst3	18721000	19643000	0	17885000	12009000	19008000	0.023656	0.074521	0.0801453	0.944174	0.938569	0.494842	0.485236	4	2.40262	0.0966032	0.151153	0.130683	Not Significant	Not Significant	0.027534	0.0249481
P21614	Vitamin D-binding protein	Gc	237790000	1012500000	899700000	128610000	151440000	375260000	1.62978	1.97645	2.43231	0.119285	0.0484622	0.137061	0.0740275	4	2.40262	0.0966032	1.01995	0.673459	Not Significant	Not Significant	1.3146	0.923413
P21619	Lamin-B2	Lmnb2	52981000	96848000	145890000	14838000	25504000	14277000	2.37143	4.71334	5.5539	0.00921688	0.00115977	0.0411602	0.0116418	4	2.40262	0.0966032	0.379713	0.273474	Significant	Significant	2.93563	2.03542
P21956	Lactadherin	Mfge8	0	32484000	24443000	0	13433000	12191000	1.07439	2.0197	2.39669	0.113537	0.0509519	0.132996	0.0759434	4	2.40262	0.0966032	0.424467	0.301434	Not Significant	Not Significant	1.29284	0.944864
P21981	Protein-glutamine gamma-glutamyltransferase 2	Tgm2	351910000	403870000	426160000	120930000	100920000	136690000	1.7274	11.4084	8.80474	0.000336766	8.26653e-05	0.0186422	0.00356708	4	2.40262	0.0966032	0.0343896	0.0577356	Not Significant	Not Significant	4.08268	3.47267
P21995	Embigin	Emb	14704000	13179000	10938000	12038000	0	7604700	0.4785	2.04071	1.97809	0.110854	0.0922633	0.131441	0.110125	4	2.40262	0.0966032	0.0824696	0.0877733	Not Significant	Not Significant	1.03497	0.955247
P22315	Ferrochelatase, mitochondrial	Fech	28933000	37280000	59564000	24501000	33592000	36292000	0.368316	1.0495	1.15829	0.353174	0.288118	0.283779	0.239682	4	2.40262	0.0966032	0.184745	0.151669	Not Significant	Not Significant	0.54043	0.452012
P22599	Alpha-1-antitrypsin 1-2	Serpina1b	502720000	875840000	462220000	312370000	163140000	435190000	1.066	2.10475	2.48227	0.103099	0.0451815	0.125505	0.0714198	4	2.40262	0.0966032	0.384769	0.276633	Not Significant	Not Significant	1.34504	0.986747
P22892	AP-1 complex subunit gamma-1	Ap1g1	74885000	73103000	91218000	77697000	82258000	76377000	0.0109243	0.102849	0.061831	0.923033	0.952583	0.489167	0.488324	4	2.40262	0.0966032	0.0169228	0.0468233	Not Significant	Not Significant	0.0210973	0.034783
P22907	Porphobilinogen deaminase	Hmbs	21648000	23289000	29717000	17812000	25251000	28574000	0.0737593	0.299201	0.295904	0.779688	0.776668	0.44987	0.440729	4	2.40262	0.0966032	0.0911585	0.0932017	Not Significant	Not Significant	0.109765	0.108079
P23116	Eukaryotic translation initiation factor 3 subunit A	Eif3a	238490000	200660000	288710000	236050000	268620000	191520000	0.0620495	0.29855	0.274347	0.780151	0.792457	0.44987	0.444411	4	2.40262	0.0966032	0.0647941	0.0767306	Not Significant	Not Significant	0.101024	0.107822
P23198	Chromobox protein homolog 3	Cbx3	132730000	146560000	116380000	126580000	107610000	120140000	0.156084	1.31689	0.859947	0.258252	0.420847	0.229222	0.307479	4	2.40262	0.0966032	0.0210719	0.0494155	Not Significant	Not Significant	0.375875	0.587956
P23242	Gap junction alpha-1 protein	Gja1	15392000	0	0	15715000	0	0	0.179395	0.428097	0.490298	0.690624	0.640274	0.420982	0.394647	4	2.40262	0.0966032	0.263406	0.200812	Not Significant	Not Significant	0.193634	0.160758
P23249	Putative helicase MOV-10	Mov10	8101400	0	12801000	7039800	6188800	6272000	0.865614	2.94806	3.09883	0.0420503	0.019443	0.0743935	0.0416853	4	2.40262	0.0966032	0.12932	0.117043	Not Significant	Not Significant	1.71124	1.37623
P23475	X-ray repair cross-complementing protein 6	Xrcc6	9040600	8103000	13255000	9415100	7846200	10114000	0.126029	0.522353	0.512233	0.629019	0.625675	0.39866	0.389699	4	2.40262	0.0966032	0.0873181	0.0908024	Not Significant	Not Significant	0.203651	0.201337
P23492	Purine nucleoside phosphorylase	Pnp	42247000	88799000	75833000	21695000	15777000	37337000	1.49214	3.05937	3.58973	0.0376818	0.0103038	0.0709889	0.0302029	4	2.40262	0.0966032	0.35682	0.259172	Not Significant	Not Significant	1.987	1.42387
P23506	Protein-L-isoaspartate(D-aspartate) O-methyltransferase	Pcmt1	69036000	41005000	46484000	101280000	99269000	113270000	-1.03781	-4.43355	-4.29451	0.0113906	0.00441251	0.0445697	0.0201241	4	2.40262	0.0966032	0.0821908	0.0875992	Not Significant	Not Significant	2.35531	1.94345
P23578	Acrosin;Acrosin light chain;Acrosin heavy chain	Acr	11871000	5036000	0	24184000	22391000	12689000	-1.15715	-2.39499	-2.80645	0.0747616	0.0288393	0.103507	0.0531968	4	2.40262	0.0966032	0.350158	0.25501	Not Significant	Not Significant	1.54002	1.12632
P23591	GDP-L-fucose synthase	Tsta3	128930000	104710000	149030000	213520000	247220000	245170000	-0.89512	-5.49466	-4.43437	0.00534685	0.00376238	0.0344178	0.0189929	4	2.40262	0.0966032	0.0398082	0.0611208	Not Significant	Not Significant	2.42454	2.2719
P23780	Beta-galactosidase	Glb1	115990000	134760000	141720000	87234000	72514000	71194000	0.766105	6.00088	4.13359	0.00388044	0.00531985	0.0301374	0.0218767	4	2.40262	0.0966032	0.0244477	0.0515244	Not Significant	Not Significant	2.2741	2.41112
P23953	Carboxylesterase 1C	Ces1c	299740000	883770000	607510000	133760000	131290000	346200000	1.57543	2.42382	2.93511	0.0724628	0.0242126	0.101263	0.0475463	4	2.40262	0.0966032	0.633703	0.432153	Not Significant	Not Significant	1.61596	1.13988
P24270	Catalase	Cat	294670000	373020000	451740000	190970000	190930000	188460000	0.951066	5.33206	4.53179	0.00595701	0.00337275	0.0354849	0.0183495	4	2.40262	0.0966032	0.0477224	0.0660652	Not Significant	Not Significant	2.47202	2.22497
P24369	Peptidyl-prolyl cis-trans isomerase B	Ppib	348930000	470930000	564390000	281260000	296970000	314260000	0.606987	2.92515	2.68599	0.0430218	0.0340304	0.075375	0.0595856	4	2.40262	0.0966032	0.0645886	0.0766022	Not Significant	Not Significant	1.46813	1.36631
P24452	Macrophage-capping protein	Capg	93365000	106990000	126390000	9513600	0	0	3.62826	19.8449	17.0941	3.80402e-05	1.39081e-06	0.00893072	0.000449544	4	2.40262	0.0966032	0.0501408	0.0675761	Significant	Significant	5.85673	4.41976
P24472	Glutathione S-transferase A4	Gsta4	628200000	675380000	737480000	660960000	733570000	759670000	-0.0784477	-0.870934	-0.458798	0.432941	0.661544	0.319231	0.401028	4	2.40262	0.0966032	0.0121697	0.0438539	Not Significant	Not Significant	0.179441	0.363572
P24527	Leukotriene A-4 hydrolase	Lta4h	343500000	367660000	357280000	280950000	307200000	309650000	0.251869	4.7331	1.56394	0.00908327	0.165769	0.040897	0.165373	4	2.40262	0.0966032	0.00424766	0.0389046	Not Significant	Not Significant	0.780497	2.04176
P24547	Inosine-5-monophosphate dehydrogenase 2	Impdh2	66422000	84565000	83845000	59963000	79478000	72288000	0.150354	0.910221	0.740616	0.414194	0.485192	0.31146	0.334385	4	2.40262	0.0966032	0.0409287	0.0618209	Not Significant	Not Significant	0.314087	0.382796
P24549	Retinal dehydrogenase 1	Aldh1a1	5335100000	7132400000	7191500000	6890400000	5747800000	7909100000	-0.0649718	-0.333977	-0.29714	0.755172	0.775766	0.441488	0.440499	4	2.40262	0.0966032	0.0567686	0.0717167	Not Significant	Not Significant	0.110269	0.121954
P24668	Cation-dependent mannose-6-phosphate receptor	M6pr	30306000	0	30360000	29155000	0	0	0.260099	0.309745	0.381554	0.772221	0.715136	0.447314	0.419205	4	2.40262	0.0966032	1.05769	0.69704	Not Significant	Not Significant	0.145611	0.112259
P24815	3 beta-hydroxysteroid dehydrogenase/Delta 5-->4-isomerase type 1;3-beta-hydroxy-Delta(5)-steroid dehydrogenase;Steroid Delta-isomerase	Hsd3b1	683620000	709550000	1016000000	577540000	590140000	565390000	0.451568	2.4659	2.12593	0.0692512	0.0747586	0.0979175	0.0970053	4	2.40262	0.0966032	0.0503022	0.0676769	Not Significant	Not Significant	1.12634	1.15957
P25206	DNA replication licensing factor MCM3	Mcm3	33970000	32385000	28480000	28947000	36850000	30669000	-0.0207745	-0.160336	-0.111595	0.880388	0.914562	0.477342	0.478786	4	2.40262	0.0966032	0.0251819	0.0519832	Not Significant	Not Significant	0.0387871	0.0553261
P25444	40S ribosomal protein S2	Rps2	323970000	290990000	463180000	436590000	325330000	288020000	0.0313503	0.116175	0.11878	0.913113	0.909089	0.486419	0.477324	4	2.40262	0.0966032	0.109231	0.104492	Not Significant	Not Significant	0.0413935	0.0394757
P25976	Nucleolar transcription factor 1	Ubtf	0	10163000	6965100	0	4224500	3787700	0.553533	1.36387	1.5528	0.244315	0.16837	0.222072	0.167348	4	2.40262	0.0966032	0.247078	0.190611	Not Significant	Not Significant	0.773736	0.61205
P26039	Talin-1	Tln1	1000100000	1271600000	1480600000	448490000	390920000	493310000	1.48144	7.73968	6.82929	0.0015011	0.000365835	0.0225207	0.00703853	4	2.40262	0.0966032	0.0549556	0.0705841	Not Significant	Not Significant	3.43671	2.82359
P26040	Ezrin	Ezr	118580000	152160000	182750000	74497000	31960000	48334000	1.61354	4.07295	4.61546	0.0151861	0.00307385	0.0500134	0.0176788	4	2.40262	0.0966032	0.235414	0.183324	Not Significant	Not Significant	2.51232	1.81855
P26041	Moesin	Msn	615980000	718370000	740150000	152420000	138070000	158640000	2.20541	21.7491	12.6093	2.64419e-05	9.28089e-06	0.00759674	0.00116575	4	2.40262	0.0966032	0.0154236	0.0458867	Significant	Significant	5.03241	4.57771
P26043	Radixin	Rdx	50810000	87068000	83983000	42230000	68722000	48427000	0.4675	1.43157	1.55151	0.225525	0.168672	0.210583	0.167478	4	2.40262	0.0966032	0.159967	0.13619	Not Significant	Not Significant	0.772957	0.646806
P26231	Catenin alpha-1	Ctnna1	46205000	59426000	65188000	32031000	32695000	35013000	0.76244	4.97167	3.8677	0.00764242	0.0073082	0.0384083	0.025732	4	2.40262	0.0966032	0.0352775	0.0582903	Not Significant	Not Significant	2.13619	2.11677
P26262	Plasma kallikrein;Plasma kallikrein heavy chain;Plasma kallikrein light chain	Klkb1	11811000	43674000	56652000	5824800	7655400	11049000	1.96343	2.6204	3.20662	0.0587746	0.0168617	0.0888432	0.0385442	4	2.40262	0.0966032	0.842143	0.562375	Not Significant	Not Significant	1.7731	1.23081
P26350	Prothymosin alpha;Prothymosin alpha, N-terminally processed;Thymosin alpha	Ptma	150250000	136140000	79549000	146990000	106620000	160600000	-0.209765	-0.622633	-0.680293	0.567264	0.520149	0.375451	0.348044	4	2.40262	0.0966032	0.170253	0.142616	Not Significant	Not Significant	0.283872	0.246215
P26369	Splicing factor U2AF 65 kDa subunit	U2af2	114900000	105230000	93324000	109180000	141050000	133150000	-0.287241	-2.0267	-1.49905	0.112635	0.181458	0.132596	0.176492	4	2.40262	0.0966032	0.0301304	0.0550747	Not Significant	Not Significant	0.741224	0.948326
P26443	Glutamate dehydrogenase 1, mitochondrial	Glud1	399790000	565840000	675030000	180550000	199680000	245190000	1.3702	5.32717	5.35388	0.00597663	0.00141373	0.0354849	0.0126931	4	2.40262	0.0966032	0.0992352	0.0982476	Not Significant	Not Significant	2.84963	2.22354
P26516	26S proteasome non-ATPase regulatory subunit 7	Psmd7	254810000	199270000	184390000	283420000	302330000	279130000	-0.451032	-3.11014	-2.33516	0.0358671	0.0555697	0.0693989	0.0809079	4	2.40262	0.0966032	0.0315462	0.0559592	Not Significant	Not Significant	1.25516	1.4453
P26638	Serine--tRNA ligase, cytoplasmic	Sars	131810000	171930000	160660000	124460000	149080000	143760000	0.14962	1.0701	0.784433	0.344849	0.460816	0.279725	0.324788	4	2.40262	0.0966032	0.0293239	0.0545708	Not Significant	Not Significant	0.336472	0.462371
P26645	Myristoylated alanine-rich C-kinase substrate	Marcks	164180000	208160000	96765000	106290000	106550000	117310000	0.438555	1.32908	1.44439	0.254565	0.195727	0.227488	0.185885	4	2.40262	0.0966032	0.163321	0.138285	Not Significant	Not Significant	0.708349	0.594201
P26883	Peptidyl-prolyl cis-trans isomerase FKBP1A	Fkbp1a	200310000	167380000	133620000	166870000	194820000	145290000	-0.0254347	-0.121961	-0.112255	0.908812	0.914059	0.485083	0.47869	4	2.40262	0.0966032	0.0652385	0.0770083	Not Significant	Not Significant	0.0390258	0.0415262
P27046	Alpha-mannosidase 2	Man2a1	22720000	28454000	29143000	25144000	25189000	22629000	0.131521	1.04956	0.71351	0.353146	0.500701	0.283779	0.340306	4	2.40262	0.0966032	0.0235539	0.0509661	Not Significant	Not Significant	0.300421	0.452046
P27048	Small nuclear ribonucleoprotein-associated protein B;Small nuclear ribonucleoprotein-associated protein N	Snrpb	28774000	33798000	36533000	34826000	33497000	38870000	-0.117317	-0.977118	-0.644119	0.383838	0.541873	0.298238	0.356274	4	2.40262	0.0966032	0.021623	0.0497598	Not Significant	Not Significant	0.266102	0.415852
P27546	Microtubule-associated protein 4	Map4	411630000	438400000	412740000	463660000	388270000	366440000	0.0583749	0.548859	0.330302	0.6123	0.751714	0.393374	0.433262	4	2.40262	0.0966032	0.0169677	0.0468513	Not Significant	Not Significant	0.123947	0.213036
P27612	Phospholipase A-2-activating protein	Plaa	152530000	165230000	175130000	154120000	185880000	171890000	-0.0526388	-0.540546	-0.303447	0.617513	0.77117	0.395135	0.439067	4	2.40262	0.0966032	0.0142245	0.0451376	Not Significant	Not Significant	0.11285	0.209354
P27641	X-ray repair cross-complementing protein 5	Xrcc5	13134000	13977000	12579000	12910000	11563000	9890100	0.215106	1.79344	1.18135	0.14736	0.279477	0.157549	0.235245	4	2.40262	0.0966032	0.0215785	0.0497319	Not Significant	Not Significant	0.553654	0.831622
P27659	60S ribosomal protein L3	Rpl3	364040000	344970000	293240000	412470000	337010000	299170000	-0.0584654	-0.355268	-0.288435	0.740331	0.782126	0.436448	0.442047	4	2.40262	0.0966032	0.0406234	0.0616302	Not Significant	Not Significant	0.106724	0.130574
P27699	cAMP-responsive element modulator	Crem	7322400	0	0	12883000	0	0	-0.562997	-2.40724	-2.3309	0.0737753	0.0559053	0.1024	0.0811771	4	2.40262	0.0966032	0.0820475	0.0875096	Not Significant	Not Significant	1.25255	1.13209
P27773	Protein disulfide-isomerase A3	Pdia3	4050900000	3523200000	4139800000	4856500000	5067000000	5366700000	-0.386798	-4.60392	-2.2881	0.0100013	0.059392	0.0424704	0.0845175	4	2.40262	0.0966032	0.0105877	0.0428655	Not Significant	Not Significant	1.22627	1.99994
P27786	Steroid 17-alpha-hydroxylase/17,20 lyase	Cyp17a1	74776000	143120000	147130000	4044200000	3194600000	3073700000	-4.8741	-14.2435	-15.6237	0.000141105	2.44459e-06	0.015915	0.000564396	4	2.40262	0.0966032	0.175648	0.145986	Significant	Significant	5.61179	3.85046
P28271	Cytoplasmic aconitate hydratase	Aco1	113440000	132210000	140230000	130830000	124470000	127280000	0.00701952	0.0750772	0.0407804	0.943758	0.968713	0.494842	0.491908	4	2.40262	0.0966032	0.0131126	0.0444429	Not Significant	Not Significant	0.0138048	0.0251393
P28352	DNA-(apurinic or apyrimidinic site) lyase;DNA-(apurinic or apyrimidinic site) lyase, mitochondrial	Apex1	89562000	88932000	90967000	83156000	87242000	85875000	0.0726171	3.22324	0.464082	0.0321812	0.657952	0.0667758	0.400139	4	2.40262	0.0966032	0.000761347	0.0367265	Not Significant	Not Significant	0.181806	1.4924
P28474	Alcohol dehydrogenase class-3	Adh5	314390000	434250000	538080000	402440000	400540000	420260000	0.0389666	0.172117	0.164387	0.871703	0.874494	0.475517	0.466742	4	2.40262	0.0966032	0.0768825	0.0842828	Not Significant	Not Significant	0.0582431	0.0596316
P28653	Biglycan	Bgn	635510000	1111000000	1812100000	35160000	31220000	151280000	4.30384	5.04932	6.22468	0.00723456	0.000618296	0.0380026	0.00876531	4	2.40262	0.0966032	1.08978	0.717084	Significant	Significant	3.2088	2.14059
P28654	Decorin	Dcn	599890000	950890000	2754500000	70898000	62391000	322780000	3.36797	3.36144	4.17315	0.028267	0.00507897	0.0628603	0.0214457	4	2.40262	0.0966032	1.50583	0.977012	Significant	Significant	2.29422	1.54872
P28656	Nucleosome assembly protein 1-like 1	Nap1l1	235540000	220760000	236260000	275370000	331840000	313050000	-0.406475	-4.7453	-2.39721	0.00900197	0.0509148	0.0406423	0.0759434	4	2.40262	0.0966032	0.0110061	0.0431269	Not Significant	Not Significant	1.29316	2.04566
P28658	Ataxin-10	Atxn10	185730000	149210000	112480000	212670000	249830000	225460000	-0.647405	-2.94059	-2.77447	0.0423641	0.0301298	0.0746474	0.0546356	4	2.40262	0.0966032	0.0727066	0.0816739	Not Significant	Not Significant	1.521	1.373
P28659	CUGBP Elav-like family member 1	Celf1	19868000	25192000	20301000	22905000	24585000	21638000	-0.0873483	-0.718043	-0.477861	0.512435	0.64863	0.352051	0.397454	4	2.40262	0.0966032	0.0221973	0.0501185	Not Significant	Not Significant	0.188003	0.290362
P28660	Nck-associated protein 1	Nckap1	0	11439000	11087000	0	5983700	5685900	0.727121	4.57259	3.6372	0.0102407	0.00970862	0.0428266	0.0293278	4	2.40262	0.0966032	0.0379298	0.0599473	Not Significant	Not Significant	2.01284	1.98967
P28665	Murinoglobulin-1	Mug1	58049000	135840000	84475000	222840000	169900000	367050000	-1.46094	-3.03401	-3.55354	0.0386282	0.0107844	0.0715315	0.0307116	4	2.40262	0.0966032	0.347794	0.253533	Not Significant	Not Significant	1.9672	1.4131
P28667	MARCKS-related protein	Marcksl1	100210000	105280000	62029000	109280000	114250000	135190000	-0.455646	-1.74751	-1.76505	0.155468	0.124883	0.163255	0.136739	4	2.40262	0.0966032	0.101978	0.0999613	Not Significant	Not Significant	0.903496	0.80836
P28740	Kinesin-like protein KIF2A	Kif2a	43326000	32858000	41698000	62376000	61993000	42306000	-0.487501	-2.18249	-2.07235	0.0944814	0.0806789	0.119439	0.101786	4	2.40262	0.0966032	0.0748408	0.0830073	Not Significant	Not Significant	1.09324	1.02465
P28741	Kinesin-like protein KIF3A	Kif3a	21624000	13594000	0	37499000	27337000	23830000	-1.01366	-2.71196	-3.03637	0.0534289	0.0211313	0.0843416	0.0436711	4	2.40262	0.0966032	0.209559	0.167172	Not Significant	Not Significant	1.67507	1.27222
P28843	Dipeptidyl peptidase 4;Dipeptidyl peptidase 4 membrane form;Dipeptidyl peptidase 4 soluble form	Dpp4	0	12611000	9731700	0	0	11978000	-0.505619	-0.80953	-0.976901	0.463616	0.364073	0.332564	0.279652	4	2.40262	0.0966032	0.585158	0.401825	Not Significant	Not Significant	0.438812	0.333842
P29341	Polyadenylate-binding protein 1	Pabpc1	935970000	558030000	661850000	1182900000	1279000000	1263700000	-0.822491	-3.70028	-3.50602	0.0208303	0.0114531	0.0556936	0.0316405	4	2.40262	0.0966032	0.0741113	0.0825515	Not Significant	Not Significant	1.94108	1.6813
P29391	Ferritin light chain 1;Ferritin light chain 2	Ftl1	2674200000	3375700000	2893600000	266340000	408540000	597670000	2.88328	8.21513	9.06692	0.00119664	6.93556e-05	0.0225059	0.0032025	4	2.40262	0.0966032	0.184772	0.151686	Significant	Significant	4.15892	2.92203
P29416	Beta-hexosaminidase subunit alpha	Hexa	244060000	213720000	188720000	37856000	40942000	37290000	2.4707	21.4891	13.7206	2.77355e-05	5.49691e-06	0.00759674	0.00111046	4	2.40262	0.0966032	0.0198288	0.0486388	Significant	Significant	5.25988	4.55696
P29533	Vascular cell adhesion protein 1	Vcam1	21777000	27334000	48608000	121400000	137720000	135000000	-2.09518	-5.9978	-6.61222	0.00388776	0.00043979	0.0301374	0.00757542	4	2.40262	0.0966032	0.183043	0.150606	Significant	Significant	3.35675	2.4103
P29699	Alpha-2-HS-glycoprotein	Ahsg	579220000	728390000	1186900000	379380000	139860000	294170000	1.66789	3.15368	3.73971	0.034392	0.00854802	0.0681168	0.0274646	4	2.40262	0.0966032	0.419556	0.298366	Not Significant	Not Significant	2.06813	1.46354
P29758	Ornithine aminotransferase, mitochondrial	Oat	127490000	247540000	196020000	116660000	131800000	151920000	0.468358	1.55494	1.6472	0.194934	0.147497	0.191256	0.153601	4	2.40262	0.0966032	0.136087	0.121271	Not Significant	Not Significant	0.831216	0.710113
P29788	Vitronectin	Vtn	0	59640000	81592000	0	0	18846000	2.04015	2.2729	2.80896	0.0854535	0.0287404	0.11298	0.0531444	4	2.40262	0.0966032	1.20852	0.791268	Not Significant	Significant	1.54151	1.06827
P30115	Glutathione S-transferase A3	Gsta3	227890000	242780000	288390000	702190000	545480000	761810000	-1.3976	-7.89408	-6.68184	0.0013927	0.00041436	0.0225059	0.00757542	4	2.40262	0.0966032	0.0470172	0.0656246	Not Significant	Not Significant	3.38262	2.85614
P30412	Peptidyl-prolyl cis-trans isomerase C	Ppic	0	20026000	15396000	0	0	7322000	0.774861	1.66408	1.93943	0.171429	0.0974829	0.174767	0.115164	4	2.40262	0.0966032	0.32523	0.239437	Not Significant	Not Significant	1.01107	0.765916
P30416	Peptidyl-prolyl cis-trans isomerase FKBP4;Peptidyl-prolyl cis-trans isomerase FKBP4, N-terminally processed	Fkbp4	691490000	647950000	605980000	875980000	858920000	903670000	-0.441452	-7.48608	-2.72006	0.00170278	0.0324688	0.0233195	0.0576001	4	2.40262	0.0966032	0.00521614	0.0395096	Not Significant	Not Significant	1.48853	2.76884
P30681	High mobility group protein B2	Hmgb2	281910000	121160000	169030000	377940000	261420000	268340000	-0.733054	-1.86263	-2.10797	0.135986	0.0766924	0.149669	0.098544	4	2.40262	0.0966032	0.232332	0.181399	Not Significant	Not Significant	1.11525	0.866507
P30999	Catenin delta-1	Ctnnd1	52745000	26403000	30140000	23354000	17299000	23951000	0.705657	2.06886	2.26749	0.107368	0.0611504	0.128889	0.0859365	4	2.40262	0.0966032	0.174508	0.145274	Not Significant	Not Significant	1.2136	0.969124
P31001	Desmin	Des	153380000	349030000	365080000	55847000	53269000	66990000	2.20525	5.26362	6.02816	0.00623914	0.000739434	0.036231	0.00948429	4	2.40262	0.0966032	0.263291	0.200741	Significant	Significant	3.1311	2.20488
P31230	Aminoacyl tRNA synthase complex-interacting multifunctional protein 1;Endothelial monocyte-activating polypeptide 2	Aimp1	81759000	82193000	111350000	101400000	103300000	95890000	-0.141571	-0.938871	-0.722712	0.400954	0.4954	0.305702	0.338298	4	2.40262	0.0966032	0.0341056	0.0575582	Not Significant	Not Significant	0.305044	0.396906
P31254	Ubiquitin-like modifier-activating enzyme 1 Y	Uba1y	59039000	49453000	47604000	61222000	91583000	88097000	-0.609805	-2.92711	-2.69283	0.0429373	0.0337108	0.0753072	0.0591749	4	2.40262	0.0966032	0.0651018	0.0769229	Not Significant	Not Significant	1.47223	1.36717
P31324	cAMP-dependent protein kinase type II-beta regulatory subunit	Prkar2b	20181000	54381000	46600000	13167000	15599000	13714000	1.39413	3.09585	3.58936	0.0363673	0.0103086	0.0694951	0.0302029	4	2.40262	0.0966032	0.304187	0.22629	Not Significant	Not Significant	1.9868	1.43929
P31428	Dipeptidase 1	Dpep1	251430000	560030000	434870000	100710000	106200000	151350000	1.74712	4.50669	5.08476	0.0107673	0.00186033	0.0439608	0.0144544	4	2.40262	0.0966032	0.225436	0.177091	Not Significant	Not Significant	2.73041	1.96789
P31750	RAC-alpha serine/threonine-protein kinase	Akt1	0	9008200	10701000	0	6989700	6288700	0.45519	2.68637	2.21834	0.0548642	0.0655623	0.0853822	0.0905616	4	2.40262	0.0966032	0.043067	0.0631567	Not Significant	Not Significant	1.18335	1.26071
P31786	Acyl-CoA-binding protein	Dbi	247430000	124180000	69824000	227920000	159650000	336820000	-0.838057	-1.36834	-1.64828	0.243027	0.147273	0.221618	0.153601	4	2.40262	0.0966032	0.562663	0.387772	Not Significant	Not Significant	0.831877	0.614346
P32020	Non-specific lipid-transfer protein	Scp2	112140000	96510000	176440000	105890000	94789000	98812000	0.315038	1.18548	1.20557	0.301439	0.27064	0.254958	0.230447	4	2.40262	0.0966032	0.105932	0.102431	Not Significant	Not Significant	0.567608	0.5208
P32037	Solute carrier family 2, facilitated glucose transporter member 3	Slc2a3	670430000	235710000	195790000	1166100000	1072600000	738200000	-1.63309	-2.77377	-3.32848	0.0501371	0.0143828	0.081418	0.0356742	4	2.40262	0.0966032	0.51996	0.361093	Not Significant	Not Significant	1.84216	1.29984
P32067	Lupus La protein homolog	Ssb	158950000	126340000	185300000	209300000	166310000	107180000	-0.00124519	-0.00382452	-0.00414163	0.997132	0.996822	0.508433	0.499842	4	2.40262	0.0966032	0.159004	0.135588	Not Significant	Not Significant	0.00138259	0.00124751
P32233	Developmentally-regulated GTP-binding protein 1	Drg1	18068000	12484000	17319000	17737000	17569000	16475000	-0.1314	-0.76477	-0.636558	0.487035	0.546485	0.342047	0.357456	4	2.40262	0.0966032	0.0442812	0.0639153	Not Significant	Not Significant	0.262422	0.312439
P32261	Antithrombin-III	Serpinc1	111300000	615530000	321440000	101460000	83167000	438850000	0.85737	0.821375	1.02121	0.457567	0.344182	0.330533	0.270546	4	2.40262	0.0966032	1.63435	1.0573	Not Significant	Not Significant	0.463212	0.339545
P32507	Nectin-2	Nectin2	29622000	29211000	33998000	33046000	28001000	32529000	-0.0110166	-0.106597	-0.0627321	0.920241	0.951893	0.488317	0.488324	4	2.40262	0.0966032	0.0160212	0.04626	Not Significant	Not Significant	0.021412	0.0360985
P32848	Parvalbumin alpha	Pvalb	0	18406000	32350000	0	0	33026000	0.0112859	0.0112588	0.0139778	0.991556	0.989273	0.506376	0.497186	4	2.40262	0.0966032	1.50722	0.977875	Not Significant	Not Significant	0.00468378	0.00368271
P32883	GTPase KRas;GTPase KRas, N-terminally processed	Kras	21674000	22410000	19081000	20245000	21805000	18174000	0.0693814	0.667102	0.394537	0.541219	0.705994	0.365122	0.415505	4	2.40262	0.0966032	0.0162253	0.0463876	Not Significant	Not Significant	0.151199	0.266627
P32921	Tryptophan--tRNA ligase, cytoplasmic;T1-TrpRS;T2-TrpRS	Wars	67470000	77166000	89629000	68658000	85465000	81168000	-0.00983184	-0.0646964	-0.0500457	0.95152	0.961611	0.496416	0.490254	4	2.40262	0.0966032	0.0346419	0.0578932	Not Significant	Not Significant	0.0170006	0.0215821
P33622	Apolipoprotein C-III	Apoc3	63238000	282540000	45645000	22458000	20233000	50275000	1.71928	1.88968	2.33679	0.1318	0.0554425	0.14637	0.0807955	4	2.40262	0.0966032	1.24168	0.811986	Not Significant	Not Significant	1.25616	0.880086
P34022	Ran-specific GTPase-activating protein	Ranbp1	362740000	263050000	173780000	559250000	431090000	479850000	-0.934177	-2.8652	-3.10394	0.0456894	0.0193115	0.0774079	0.0416853	4	2.40262	0.0966032	0.159456	0.13587	Not Significant	Not Significant	1.71418	1.34018
P34884	Macrophage migration inhibitory factor	Mif	209990000	148200000	196560000	188500000	199660000	215270000	-0.13514	-0.824772	-0.6679	0.455844	0.527528	0.329723	0.350617	4	2.40262	0.0966032	0.0402711	0.06141	Not Significant	Not Significant	0.277754	0.341184
P34914	Bifunctional epoxide hydrolase 2;Cytosolic epoxide hydrolase 2;Lipid-phosphate phosphatase	Ephx2	0	5760800	7031900	0	4153700	0	0.654785	0.832364	1.02163	0.452012	0.343995	0.328011	0.27053	4	2.40262	0.0966032	0.928245	0.616167	Not Significant	Not Significant	0.463448	0.34485
P34928	Apolipoprotein C-I;Truncated apolipoprotein C-I	Apoc1	53467000	174080000	185280000	6252200	17736000	34554000	2.938	3.17686	3.93135	0.033636	0.00676663	0.0678247	0.0245476	4	2.40262	0.0966032	1.28291	0.837743	Significant	Significant	2.16963	1.4732
P35123	Ubiquitin carboxyl-terminal hydrolase 4	Usp4	89417000	113340000	131620000	143040000	187200000	178260000	-0.613108	-3.04214	-2.75452	0.0383217	0.0309658	0.0715315	0.0557142	4	2.40262	0.0966032	0.0609266	0.0743144	Not Significant	Not Significant	1.50912	1.41655
P35235	Tyrosine-protein phosphatase non-receptor type 11	Ptpn11	20016000	34001000	30054000	22709000	20455000	18723000	0.411253	1.68168	1.65793	0.167924	0.145285	0.172155	0.152467	4	2.40262	0.0966032	0.0897063	0.0922944	Not Significant	Not Significant	0.837779	0.774888
P35278	Ras-related protein Rab-5C	Rab5c	134590000	163980000	176200000	97768000	102200000	92624000	0.690339	5.60237	3.76313	0.00498449	0.0083049	0.0333286	0.0273297	4	2.40262	0.0966032	0.0227757	0.0504799	Not Significant	Not Significant	2.08067	2.30238
P35279	Ras-related protein Rab-6A;Ras-related protein Rab-6B	Rab6a	189640000	220830000	199710000	197640000	255510000	206470000	-0.106027	-0.807099	-0.567153	0.464864	0.589929	0.332898	0.375798	4	2.40262	0.0966032	0.0258863	0.0524232	Not Significant	Not Significant	0.2292	0.332674
P35282	Ras-related protein Rab-21	Rab21	92493000	85443000	74873000	77187000	89722000	88502000	-0.0169259	-0.150122	-0.0944579	0.887934	0.927633	0.478668	0.482506	4	2.40262	0.0966032	0.0190679	0.0481635	Not Significant	Not Significant	0.0326239	0.0516194
P35285	Ras-related protein Rab-22A	Rab22a	4583400	0	0	5954000	0	0	-0.0881291	-0.156427	-0.186848	0.883274	0.857561	0.477825	0.461976	4	2.40262	0.0966032	0.476107	0.333696	Not Significant	Not Significant	0.0667351	0.0539047
P35293	Ras-related protein Rab-18	Rab18	101380000	130190000	117420000	112600000	150860000	136360000	-0.193256	-1.19226	-0.959328	0.299055	0.372207	0.253333	0.282676	4	2.40262	0.0966032	0.039411	0.0608727	Not Significant	Not Significant	0.429216	0.524248
P35486	Pyruvate dehydrogenase E1 component subunit alpha, somatic form, mitochondrial	Pdha1	55757000	60734000	62692000	29378000	22315000	25795000	1.2167	9.71671	6.60209	0.000628079	0.000443637	0.0186422	0.00757542	4	2.40262	0.0966032	0.023519	0.0509443	Not Significant	Not Significant	3.35297	3.20199
P35487	Pyruvate dehydrogenase E1 component subunit alpha, testis-specific form, mitochondrial	Pdha2	657900000	228120000	255150000	1192600000	895630000	790800000	-1.48775	-2.8862	-3.41163	0.0447332	0.0129199	0.0764977	0.0337915	4	2.40262	0.0966032	0.398563	0.285251	Not Significant	Not Significant	1.88874	1.34937
P35505	Fumarylacetoacetase	Fah	33265000	58170000	39058000	29856000	31329000	47030000	0.260266	0.820297	0.882084	0.458115	0.409623	0.33066	0.301733	4	2.40262	0.0966032	0.151002	0.130589	Not Significant	Not Significant	0.387616	0.339025
P35550	rRNA 2-O-methyltransferase fibrillarin	Fbl	74391000	36992000	60638000	49352000	47176000	0	0.839143	1.174	1.43209	0.305521	0.199077	0.257087	0.18749	4	2.40262	0.0966032	0.766346	0.515022	Not Significant	Not Significant	0.70098	0.514959
P35564	Calnexin	Canx	1130700000	699850000	783710000	1200100000	805790000	813470000	-0.114355	-0.405651	-0.420902	0.70576	0.687592	0.426412	0.408994	4	2.40262	0.0966032	0.119206	0.110724	Not Significant	Not Significant	0.162669	0.151343
P35585	AP-1 complex subunit mu-1	Ap1m1	140040000	111520000	91224000	144670000	150870000	138770000	-0.362714	-1.99313	-1.71257	0.117031	0.134509	0.135347	0.144537	4	2.40262	0.0966032	0.049676	0.0672857	Not Significant	Not Significant	0.871249	0.931699
P35700	Peroxiredoxin-1	Prdx1	2272700000	2733500000	2844700000	1194900000	1705500000	1791700000	0.75834	3.62154	3.33968	0.0223268	0.0141756	0.0571521	0.0353542	4	2.40262	0.0966032	0.0657708	0.0773409	Not Significant	Not Significant	1.84846	1.65117
P35762	CD81 antigen	Cd81	16580000	26081000	23910000	0	12948000	15042000	0.938687	2.58628	2.87684	0.0609223	0.0262015	0.0911004	0.0502909	4	2.40262	0.0966032	0.197597	0.159699	Not Significant	Not Significant	1.58167	1.21522
P35821	Tyrosine-protein phosphatase non-receptor type 1	Ptpn1	30362000	32193000	35122000	21837000	21251000	25339000	0.515241	5.16562	2.95595	0.00667209	0.0235413	0.0371691	0.0466813	4	2.40262	0.0966032	0.0149234	0.0455742	Not Significant	Not Significant	1.62817	2.17574
P35922	Fragile X mental retardation protein 1 homolog	Fmr1	11135000	5618200	7274400	0	6518400	6500900	-0.0199981	-0.0515021	-0.0581275	0.961395	0.955419	0.498362	0.488722	4	2.40262	0.0966032	0.226163	0.177545	Not Significant	Not Significant	0.019806	0.0170982
P35979	60S ribosomal protein L12	Rpl12	402570000	292830000	462230000	397610000	321700000	310140000	0.152641	0.679263	0.646674	0.534245	0.54032	0.361753	0.356128	4	2.40262	0.0966032	0.0757462	0.0835729	Not Significant	Not Significant	0.267349	0.27226
P35980	60S ribosomal protein L18	Rpl18	119370000	147540000	169090000	149750000	155190000	147150000	-0.0665138	-0.449771	-0.341974	0.676172	0.743318	0.41587	0.430418	4	2.40262	0.0966032	0.0328043	0.0567452	Not Significant	Not Significant	0.128825	0.169943
P36536	GTP-binding protein SAR1a	Sar1a	106420000	68862000	50355000	86785000	59761000	72951000	-0.0120124	-0.034368	-0.0378939	0.97423	0.970926	0.501846	0.492202	4	2.40262	0.0966032	0.183249	0.150735	Not Significant	Not Significant	0.0128137	0.0113384
P36916	Guanine nucleotide-binding protein-like 1	Gnl1	21765000	12038000	17954000	35446000	31710000	26831000	-0.893517	-3.22113	-3.32442	0.0322459	0.0144586	0.0668255	0.0357292	4	2.40262	0.0966032	0.11542	0.108359	Not Significant	Not Significant	1.83988	1.49153
P36993	Protein phosphatase 1B	Ppm1b	75936000	51622000	82113000	114640000	126300000	137690000	-0.876931	-3.97498	-3.75383	0.01647	0.00840054	0.0515741	0.0273717	4	2.40262	0.0966032	0.0730049	0.0818603	Not Significant	Not Significant	2.07569	1.78331
P37040	NADPH--cytochrome P450 reductase	Por	145760000	137830000	203820000	115460000	118210000	116700000	0.454077	2.57261	2.17388	0.061808	0.0698339	0.0916741	0.0931944	4	2.40262	0.0966032	0.0467307	0.0654456	Not Significant	Not Significant	1.15593	1.20896
P37804	Transgelin	Tagln	110010000	902280000	204520000	180440000	103320000	321180000	0.587144	0.577302	0.717099	0.594672	0.498629	0.386583	0.339744	4	2.40262	0.0966032	1.55158	1.00559	Not Significant	Not Significant	0.302222	0.225722
P37913	DNA ligase 1	Lig1	4899200	0	0	6120300	0	0	-0.749848	-1.0053	-1.22983	0.371633	0.262027	0.292388	0.225663	4	2.40262	0.0966032	0.834546	0.557629	Not Significant	Not Significant	0.581654	0.429885
P38060	Hydroxymethylglutaryl-CoA lyase, mitochondrial	Hmgcl	26082000	55513000	85069000	29055000	41866000	52962000	0.311664	0.557826	0.665702	0.606707	0.528844	0.391003	0.351142	4	2.40262	0.0966032	0.468236	0.328779	Not Significant	Not Significant	0.276672	0.217021
P38647	Stress-70 protein, mitochondrial	Hspa9	928280000	1004200000	1231100000	844750000	939670000	876560000	0.240626	1.85877	1.29292	0.136595	0.240731	0.150053	0.213413	4	2.40262	0.0966032	0.0251378	0.0519556	Not Significant	Not Significant	0.618468	0.864565
P39054	Dynamin-2	Dnm2	152720000	155680000	166180000	139350000	136270000	121390000	0.25913	3.60549	1.56562	0.0226472	0.16538	0.0574554	0.165086	4	2.40262	0.0966032	0.00774811	0.0410915	Not Significant	Not Significant	0.781518	1.64499
P39061	Collagen alpha-1(XVIII) chain;Endostatin	Col18a1	20593000	74901000	50650000	14070000	20476000	16248000	1.35363	2.35993	2.82429	0.0776686	0.0281449	0.106034	0.0525516	4	2.40262	0.0966032	0.493504	0.344565	Not Significant	Not Significant	1.5506	1.10975
P39447	Tight junction protein ZO-1	Tjp1	47614000	28667000	32992000	38469000	32854000	23566000	0.198807	0.658943	0.698383	0.545934	0.509498	0.366198	0.343375	4	2.40262	0.0966032	0.13654	0.121553	Not Significant	Not Significant	0.292858	0.26286
P39688	Tyrosine-protein kinase Fyn;Tyrosine-protein kinase Yes	Fyn	24399000	0	0	22289000	0	0	-0.199985	-0.295947	-0.359505	0.781999	0.730779	0.450014	0.424985	4	2.40262	0.0966032	0.684947	0.464168	Not Significant	Not Significant	0.136214	0.106794
P39749	Flap endonuclease 1	Fen1	15854000	24523000	26540000	15424000	17620000	0	0.706661	1.82578	2.05929	0.141922	0.0821926	0.15395	0.103052	4	2.40262	0.0966032	0.224708	0.176636	Not Significant	Not Significant	1.08517	0.84795
P40124	Adenylyl cyclase-associated protein 1	Cap1	1102300000	925620000	1122200000	931760000	821790000	758270000	0.326561	2.63707	1.77763	0.0577572	0.122677	0.0878869	0.135148	4	2.40262	0.0966032	0.0230026	0.0506216	Not Significant	Not Significant	0.911237	1.23839
P40142	Transketolase	Tkt	593520000	787260000	893490000	573840000	673880000	680440000	0.221993	1.15749	1.02238	0.311484	0.343668	0.260637	0.270525	4	2.40262	0.0966032	0.0551746	0.0707209	Not Significant	Not Significant	0.46386	0.506565
P40336	Vacuolar protein sorting-associated protein 26A	Vps26a	111130000	142860000	133210000	87040000	124600000	126260000	0.209034	1.01326	0.927842	0.368245	0.38713	0.291094	0.290113	4	2.40262	0.0966032	0.063838	0.0761333	Not Significant	Not Significant	0.412143	0.433864
P40630	Transcription factor A, mitochondrial	Tfam	50459000	34231000	95350000	88997000	103070000	65199000	-0.62017	-1.31173	-1.53226	0.25983	0.173262	0.230035	0.171053	4	2.40262	0.0966032	0.335293	0.245723	Not Significant	Not Significant	0.761295	0.58531
P41105	60S ribosomal protein L28	Rpl28	39029000	44772000	44244000	64975000	59705000	50256000	-0.444802	-3.52713	-2.40864	0.0242934	0.0501024	0.0594171	0.075297	4	2.40262	0.0966032	0.0238552	0.0511543	Not Significant	Not Significant	1.30014	1.61451
P41209	Centrin-1	Cetn1	7753700	0	0	10785000	0	0	-0.233981	-0.347404	-0.421904	0.745797	0.686897	0.438982	0.408731	4	2.40262	0.0966032	0.680427	0.461344	Not Significant	Not Significant	0.163108	0.127379
P41216	Long-chain-fatty-acid--CoA ligase 1	Acsl1	42755000	38693000	39848000	45130000	55736000	46518000	-0.275937	-2.6475	-1.56839	0.0571307	0.164741	0.0874192	0.164754	4	2.40262	0.0966032	0.0162945	0.0464308	Not Significant	Not Significant	0.783198	1.24313
P41233	ATP-binding cassette sub-family A member 1	Abca1	38211000	0	0	13473000	0	0	0.674805	0.818597	1.00739	0.45898	0.350292	0.330682	0.272959	4	2.40262	0.0966032	1.01931	0.67306	Not Significant	Not Significant	0.45557	0.338206
P41241	Tyrosine-protein kinase CSK	Csk	8493300	11703000	10286000	6944000	6889400	7334200	0.514319	3.74559	2.7127	0.0200236	0.0327992	0.0552126	0.057932	4	2.40262	0.0966032	0.0282824	0.0539202	Not Significant	Not Significant	1.48414	1.69846
P42125	Enoyl-CoA delta isomerase 1, mitochondrial	Eci1	89567000	110420000	164520000	69133000	65113000	59439000	0.868119	3.2761	3.32823	0.0306127	0.0143874	0.0653425	0.0356742	4	2.40262	0.0966032	0.105326	0.102053	Not Significant	Not Significant	1.84202	1.5141
P42208	Septin-2	2002-09-01	222210000	284880000	238930000	183240000	200180000	217020000	0.308669	2.41827	1.66555	0.0728997	0.143736	0.101528	0.15153	4	2.40262	0.0966032	0.0244382	0.0515185	Not Significant	Not Significant	0.842435	1.13727
P42225	Signal transducer and activator of transcription 1	Stat1	38510000	61711000	63145000	16834000	20209000	21499000	1.45293	5.68699	5.70125	0.00472076	0.00100553	0.032762	0.0110548	4	2.40262	0.0966032	0.0979072	0.0974179	Not Significant	Not Significant	2.99761	2.32599
P42227	Signal transducer and activator of transcription 3	Stat3	43438000	52739000	52118000	20083000	21802000	23600000	1.1768	10.4326	6.56655	0.000476918	0.000457433	0.0186422	0.00757542	4	2.40262	0.0966032	0.0190859	0.0481747	Not Significant	Not Significant	3.33967	3.32156
P42228	Signal transducer and activator of transcription 4	Stat4	10566000	0	0	24742000	8470300	9034100	-1.00196	-1.56589	-1.89368	0.192433	0.104039	0.189027	0.121014	4	2.40262	0.0966032	0.614139	0.419931	Not Significant	Not Significant	0.982802	0.715721
P42567	Epidermal growth factor receptor substrate 15	Eps15	99679000	106140000	99796000	87991000	106580000	93307000	0.0903207	1.03698	0.531235	0.358318	0.613175	0.28627	0.385291	4	2.40262	0.0966032	0.0113796	0.0433602	Not Significant	Not Significant	0.212416	0.445732
P42669	Transcriptional activator protein Pur-alpha	Pura	53099000	60594000	75418000	31650000	34030000	49375000	0.729992	2.94876	2.92102	0.0420212	0.0246784	0.0743935	0.0480523	4	2.40262	0.0966032	0.0919282	0.0936825	Not Significant	Not Significant	1.60768	1.37653
P42703	Leukemia inhibitory factor receptor	Lifr	15685000	202690000	333580000	0	1226200	2549900	5.26719	3.47382	4.35846	0.0254947	0.00410088	0.0604994	0.0196081	4	2.40262	0.0966032	3.44853	2.1907	Significant	Significant	2.38712	1.59355
P42932	T-complex protein 1 subunit theta	Cct8	1051300000	768980000	935160000	1414900000	1371600000	1373300000	-0.60591	-4.57583	-3.23312	0.0102156	0.0162856	0.0428266	0.0379246	4	2.40262	0.0966032	0.0263007	0.0526821	Not Significant	Not Significant	1.7882	1.99074
P43024	Cytochrome c oxidase subunit 6A1, mitochondrial	Cox6a1	316850000	44272000	0	346340000	85726000	129050000	-1.56181	-1.01348	-1.2719	0.368155	0.247653	0.291094	0.217403	4	2.40262	0.0966032	3.56223	2.26173	Not Significant	Not Significant	0.606156	0.43397
P43025	Tetranectin	Clec3b	5961700	52638000	37365000	0	0	9458600	1.57023	1.37079	1.70927	0.242324	0.135137	0.221597	0.144923	4	2.40262	0.0966032	1.96824	1.26589	Not Significant	Not Significant	0.869225	0.615603
P43274	Histone H1.4	Hist1h1e	142150000	113990000	81584000	56935000	44575000	0	2.11437	2.06669	2.5677	0.107633	0.0400986	0.129018	0.0662306	4	2.40262	0.0966032	1.57	1.0171	Not Significant	Significant	1.39687	0.968055
P43275	Histone H1.1	Hist1h1a	196380000	200290000	293070000	288640000	174540000	16881000	1.25356	0.982607	1.22865	0.381433	0.262442	0.297224	0.225726	4	2.40262	0.0966032	2.44131	1.56145	Not Significant	Not Significant	0.580967	0.418581
P43276	Histone H1.5	Hist1h1b	48137000	38302000	52205000	14886000	6769000	9710300	2.20673	6.22011	6.88259	0.00340095	0.00034991	0.0284036	0.00688953	4	2.40262	0.0966032	0.188797	0.154201	Significant	Significant	3.45604	2.4684
P43406	Integrin alpha-V;Integrin alpha-V heavy chain;Integrin alpha-V light chain	Itgav	0	14862000	11449000	0	7236800	7815900	0.856119	2.98494	3.11451	0.0405403	0.0190424	0.0734394	0.0413642	4	2.40262	0.0966032	0.123392	0.11334	Not Significant	Not Significant	1.72028	1.39211
P43883	Perilipin-2	Plin2	93782000	34741000	71656000	10479000	0	0	3.00922	5.31011	6.34681	0.00604575	0.000554408	0.0354849	0.00850917	4	2.40262	0.0966032	0.481718	0.337202	Significant	Significant	3.25617	2.21855
P45376	Aldose reductase	Akr1b1	1935400000	2605600000	2553300000	1594600000	2070100000	2438100000	0.225986	1.00102	0.954899	0.373463	0.374279	0.293518	0.283716	4	2.40262	0.0966032	0.0764484	0.0840116	Not Significant	Not Significant	0.426805	0.427752
P45377	Aldose reductase-related protein 2	Akr1b8	609160000	362750000	378440000	709580000	372670000	392530000	-0.103935	-0.271752	-0.305753	0.799262	0.769492	0.455445	0.438659	4	2.40262	0.0966032	0.219417	0.173331	Not Significant	Not Significant	0.113796	0.0973108
P45591	Cofilin-2	Cfl2	83784000	98101000	97836000	103980000	152130000	168620000	-0.576621	-2.56205	-2.44076	0.0625026	0.0478908	0.0920398	0.0735021	4	2.40262	0.0966032	0.0759799	0.0837189	Not Significant	Not Significant	1.31975	1.2041
P45878	Peptidyl-prolyl cis-trans isomerase FKBP2	Fkbp2	84819000	71889000	84764000	87537000	80283000	75857000	-0.0148865	-0.149537	-0.0854382	0.888367	0.934523	0.478668	0.484073	4	2.40262	0.0966032	0.0148655	0.0455381	Not Significant	Not Significant	0.0294102	0.0514078
P45952	Medium-chain specific acyl-CoA dehydrogenase, mitochondrial	Acadm	324960000	421010000	571900000	217800000	197430000	190460000	1.08535	4.47231	4.39584	0.011055	0.00393013	0.0442038	0.019143	4	2.40262	0.0966032	0.0883418	0.0914419	Not Significant	Not Significant	2.40559	1.95644
P46061	Ran GTPase-activating protein 1	Rangap1	93433000	82419000	86610000	91554000	93807000	84513000	-0.040683	-0.585016	-0.246729	0.589948	0.81284	0.384404	0.45031	4	2.40262	0.0966032	0.00725407	0.0407828	Not Significant	Not Significant	0.0899949	0.229187
P46412	Glutathione peroxidase 3	Gpx3	20944000	0	48339000	0	9443700	17425000	0.963724	1.07888	1.33303	0.341357	0.227994	0.277715	0.205046	4	2.40262	0.0966032	1.19688	0.783998	Not Significant	Not Significant	0.642077	0.466791
P46460	Vesicle-fusing ATPase	Nsf	77568000	88832000	108150000	62411000	76766000	66828000	0.406261	2.46807	2.00406	0.0690897	0.0889149	0.0978807	0.108297	4	2.40262	0.0966032	0.040643	0.0616424	Not Significant	Not Significant	1.05103	1.16059
P46467	Vacuolar protein sorting-associated protein 4B	Vps4b	37533000	36777000	41835000	17657000	21599000	21115000	0.9474	8.72771	5.33556	0.000949436	0.00143997	0.0201541	0.0128573	4	2.40262	0.0966032	0.0176749	0.0472932	Not Significant	Not Significant	2.84165	3.02253
P46471	26S protease regulatory subunit 7	Psmc2	298440000	243050000	285560000	310610000	334910000	306570000	-0.207535	-2.10908	-1.19391	0.102597	0.274866	0.125322	0.232697	4	2.40262	0.0966032	0.0145242	0.0453248	Not Significant	Not Significant	0.560879	0.988865
P46638	Ras-related protein Rab-11B	Rab11b	647000000	688970000	693760000	545320000	665550000	659080000	0.123513	1.24909	0.709848	0.279739	0.502821	0.241704	0.340608	4	2.40262	0.0966032	0.0146666	0.0454138	Not Significant	Not Significant	0.298586	0.553247
P46656	Adrenodoxin, mitochondrial	Fdx1	325880000	345780000	844660000	126820000	99440000	105530000	2.05341	4.49502	5.2234	0.010864	0.00161308	0.0440833	0.0132086	4	2.40262	0.0966032	0.313026	0.231812	Significant	Significant	2.79234	1.96401
P46664	Adenylosuccinate synthetase isozyme 2	Adss	41707000	52626000	56183000	66218000	76556000	78494000	-0.563374	-3.72593	-2.87307	0.0203689	0.0263361	0.0553292	0.0504059	4	2.40262	0.0966032	0.0342938	0.0576757	Not Significant	Not Significant	1.57945	1.69103
P46686	Tubby-related protein 2	Tulp2	37084000	14190000	7194300	66739000	73314000	47142000	-1.97634	-2.77134	-3.38002	0.0502622	0.013456	0.0815406	0.0344093	4	2.40262	0.0966032	0.762849	0.512836	Not Significant	Not Significant	1.87108	1.29876
P46935	E3 ubiquitin-protein ligase NEDD4	Nedd4	58719000	87234000	98539000	40111000	39669000	41009000	0.983821	4.35547	4.1558	0.012105	0.00518311	0.0461187	0.021701	4	2.40262	0.0966032	0.0765337	0.0840649	Not Significant	Not Significant	2.28541	1.91703
P46938	Transcriptional coactivator YAP1	Yap1	6086800	7071300	6736700	5788200	6246500	7103400	0.058343	0.544271	0.329532	0.615174	0.752269	0.394699	0.433273	4	2.40262	0.0966032	0.0172361	0.047019	Not Significant	Not Significant	0.123627	0.211002
P46978	Dolichyl-diphosphooligosaccharide--protein glycosyltransferase subunit STT3A	Stt3a	104430000	105710000	129670000	98575000	118430000	96221000	0.11658	0.841123	0.612997	0.447623	0.561009	0.326227	0.362547	4	2.40262	0.0966032	0.0288153	0.0542531	Not Significant	Not Significant	0.25103	0.349087
P47199	Quinone oxidoreductase	Cryz	117090000	123880000	121000000	98855000	93607000	94205000	0.336539	9.82469	2.13272	0.00060181	0.07404	0.0186422	0.0964202	4	2.40262	0.0966032	0.00176005	0.0373505	Not Significant	Not Significant	1.13053	3.22054
P47226	Testin	Tes	10621000	0	0	15136000	0	0	0.0284919	0.0473758	0.0569693	0.964485	0.956306	0.499064	0.488722	4	2.40262	0.0966032	0.542526	0.375191	Not Significant	Not Significant	0.019403	0.0157046
P47738	Aldehyde dehydrogenase, mitochondrial	Aldh2	1953300000	2097300000	2445300000	1841700000	2043300000	2092700000	0.115718	1.0414	0.648089	0.356491	0.539462	0.285644	0.355805	4	2.40262	0.0966032	0.0185205	0.0478215	Not Significant	Not Significant	0.268039	0.447952
P47740	Fatty aldehyde dehydrogenase	Aldh3a2	45102000	56419000	70310000	52196000	54003000	55873000	0.0613241	0.327813	0.285831	0.759494	0.784032	0.442763	0.442422	4	2.40262	0.0966032	0.0524931	0.0690457	Not Significant	Not Significant	0.105666	0.119476
P47753	F-actin-capping protein subunit alpha-1	Capza1	247800000	309850000	335450000	197430000	223120000	250920000	0.406818	2.47217	2.00705	0.0687864	0.0885374	0.0977502	0.108154	4	2.40262	0.0966032	0.0406196	0.0616278	Not Significant	Not Significant	1.05287	1.1625
P47754	F-actin-capping protein subunit alpha-2	Capza2	255030000	338060000	169950000	154610000	160650000	170810000	0.596037	2.0483	2.14702	0.109902	0.07255	0.130879	0.0956363	4	2.40262	0.0966032	0.127013	0.115602	Not Significant	Not Significant	1.13936	0.958994
P47757	F-actin-capping protein subunit beta	Capzb	421940000	333040000	342280000	309380000	274680000	235820000	0.421031	2.69139	2.11961	0.0545796	0.075433	0.0851114	0.0975275	4	2.40262	0.0966032	0.0367086	0.0591844	Not Significant	Not Significant	1.12244	1.26297
P47758	Signal recognition particle receptor subunit beta	Srprb	73227000	81147000	58395000	78413000	90603000	67366000	-0.154638	-0.827793	-0.721246	0.454316	0.496241	0.328763	0.338585	4	2.40262	0.0966032	0.0523456	0.0689535	Not Significant	Not Significant	0.304307	0.342642
P47791	Glutathione reductase, mitochondrial	Gsr	118460000	139830000	164720000	98684000	105550000	112850000	0.404956	2.73196	2.08028	0.0523371	0.0797732	0.0835865	0.101276	4	2.40262	0.0966032	0.0329578	0.0568411	Not Significant	Not Significant	1.09814	1.28119
P47802	Metaxin-1	Mtx1	58214000	32048000	59263000	91605000	41680000	42356000	-0.182872	-0.385126	-0.450161	0.719747	0.667438	0.431217	0.402603	4	2.40262	0.0966032	0.338204	0.247542	Not Significant	Not Significant	0.175589	0.14282
P47809	Dual specificity mitogen-activated protein kinase kinase 4	Map2k4	0	7086400	7871900	0	6957400	7401500	0.0581535	0.870704	0.354212	0.433053	0.734556	0.319231	0.426414	4	2.40262	0.0966032	0.00669117	0.0404312	Not Significant	Not Significant	0.133975	0.363459
P47811	Mitogen-activated protein kinase 14	Mapk14	0	30437000	28390000	0	12478000	15809000	0.86652	2.22229	2.51031	0.0903814	0.0434429	0.116705	0.0697213	4	2.40262	0.0966032	0.228058	0.178729	Not Significant	Not Significant	1.36208	1.04392
P47856	Glutamine--fructose-6-phosphate aminotransferase [isomerizing] 1	Gfpt1	39743000	49266000	45631000	40817000	52975000	44310000	-0.0336023	-0.234402	-0.174676	0.826182	0.866728	0.464258	0.464884	4	2.40262	0.0966032	0.030825	0.0555087	Not Significant	Not Significant	0.0621172	0.0829243
P47857	ATP-dependent 6-phosphofructokinase, muscle type	Pfkm	49005000	37654000	15987000	126240000	87942000	80066000	-1.63774	-3.10572	-3.68153	0.0360209	0.0091868	0.0693989	0.0282484	4	2.40262	0.0966032	0.417114	0.29684	Not Significant	Not Significant	2.03684	1.44345
P47911	60S ribosomal protein L6	Rpl6	390390000	269800000	339710000	360130000	291100000	273540000	0.106442	0.541856	0.484452	0.61669	0.644194	0.395113	0.395861	4	2.40262	0.0966032	0.0578827	0.0724128	Not Significant	Not Significant	0.190983	0.209933
P47915	60S ribosomal protein L29	Rpl29	39193000	0	34580000	78087000	0	0	0.170883	0.116571	0.146172	0.912818	0.88828	0.486419	0.471298	4	2.40262	0.0966032	3.22335	2.05002	Not Significant	Not Significant	0.0514502	0.0396156
P47934	Carnitine O-acetyltransferase	Crat	277920000	145510000	215100000	443510000	471940000	394190000	-1.08189	-3.83767	-3.98198	0.0184964	0.00636744	0.0536629	0.0241001	4	2.40262	0.0966032	0.119213	0.110728	Not Significant	Not Significant	2.19604	1.73291
P47941	Crk-like protein	Crkl	18296000	13118000	20889000	11277000	14542000	12048000	0.447806	1.96502	1.88206	0.120857	0.105772	0.138168	0.122451	4	2.40262	0.0966032	0.0779	0.0849185	Not Significant	Not Significant	0.97563	0.917726
P47955	60S acidic ribosomal protein P1	Rplp1	367330000	163410000	194630000	358160000	189140000	208660000	-0.0916352	-0.200896	-0.233395	0.850582	0.822739	0.469862	0.451648	4	2.40262	0.0966032	0.312086	0.231225	Not Significant	Not Significant	0.0847377	0.070284
P47962	60S ribosomal protein L5	Rpl5	157800000	129150000	212060000	188950000	128690000	130760000	0.147597	0.535628	0.551574	0.620611	0.599949	0.396595	0.38029	4	2.40262	0.0966032	0.113899	0.107409	Not Significant	Not Significant	0.221885	0.207181
P47963	60S ribosomal protein L13	Rpl13	174960000	175760000	220730000	175410000	141750000	134750000	0.339517	2.11231	1.69109	0.102224	0.13865	0.125212	0.148003	4	2.40262	0.0966032	0.0387525	0.0604613	Not Significant	Not Significant	0.85808	0.990445
P47964	60S ribosomal protein L36	Rpl36	0	20115000	28874000	50565000	49471000	28753000	-1.32747	-2.13777	-2.5784	0.0993366	0.0395057	0.123183	0.0660236	4	2.40262	0.0966032	0.578389	0.397596	Not Significant	Not Significant	1.40334	1.00289
P47968	Ribose-5-phosphate isomerase	Rpia	0	6057900	0	0	7641000	6883900	-0.273351	-0.685723	-0.778012	0.530566	0.464334	0.360152	0.325955	4	2.40262	0.0966032	0.23836	0.185165	Not Significant	Not Significant	0.333169	0.275261
P48024	Eukaryotic translation initiation factor 1	Eif1	187580000	147520000	96622000	152310000	221610000	207640000	-0.463426	-1.42257	-1.54076	0.227936	0.171223	0.212231	0.169454	4	2.40262	0.0966032	0.159185	0.135701	Not Significant	Not Significant	0.766439	0.642188
P48036	Annexin A5	Anxa5	1027900000	1351800000	1858100000	296990000	369170000	396550000	1.964	7.09449	7.31706	0.00208461	0.000245876	0.0248249	0.00543655	4	2.40262	0.0966032	0.114956	0.108069	Not Significant	Not Significant	3.60928	2.68098
P48428	Tubulin-specific chaperone A	Tbca	170750000	221960000	194280000	241140000	337790000	348760000	-0.649303	-3.2093	-2.91135	0.0326106	0.0250033	0.0671443	0.048568	4	2.40262	0.0966032	0.0613996	0.0746099	Not Significant	Not Significant	1.602	1.48664
P48455	Serine/threonine-protein phosphatase 2B catalytic subunit gamma isoform	Ppp3cc	44985000	35624000	42128000	46106000	70228000	54177000	-0.459203	-2.2592	-2.05407	0.0867576	0.0828058	0.114062	0.103499	4	2.40262	0.0966032	0.0619716	0.0749673	Not Significant	Not Significant	1.08194	1.06169
P48678	Prelamin-A/C;Lamin-A/C	Lmna	455010000	654930000	660940000	142460000	166240000	197680000	1.79826	8.03408	7.63548	0.00130266	0.000191879	0.0225059	0.00492325	4	2.40262	0.0966032	0.0751488	0.0831997	Not Significant	Not Significant	3.71697	2.88517
P48722	Heat shock 70 kDa protein 4L	Hspa4l	1821300000	969970000	1374700000	3112800000	3198700000	2878400000	-1.18696	-4.44848	-4.53031	0.01126	0.00337831	0.0445697	0.0183495	4	2.40262	0.0966032	0.106792	0.102968	Not Significant	Not Significant	2.4713	1.94846
P48758	Carbonyl reductase [NADPH] 1	Cbr1	95359000	110240000	101060000	87807000	77742000	94792000	0.23843	2.3122	1.35835	0.0818343	0.220265	0.109516	0.200099	4	2.40262	0.0966032	0.01595	0.0462156	Not Significant	Not Significant	0.657055	1.08706
P48771	Cytochrome c oxidase subunit 7A2, mitochondrial	Cox7a2	83706000	0	0	77084000	0	0	-0.445756	-0.317659	-0.398002	0.766635	0.703563	0.445189	0.414953	4	2.40262	0.0966032	2.95368	1.88155	Not Significant	Not Significant	0.152697	0.115411
P48774	Glutathione S-transferase Mu 5	Gstm5	1021900000	608650000	693720000	1950100000	2502900000	2385200000	-1.58463	-6.33665	-6.30149	0.00317569	0.000577198	0.0284036	0.00855313	4	2.40262	0.0966032	0.0938054	0.0948553	Not Significant	Not Significant	3.23868	2.49816
P48794	Hyaluronidase PH-20	Spam1	9322500	5356000	8884700	17489000	21943000	13036000	-1.1651	-3.47065	-3.78861	0.0255686	0.00804895	0.0604994	0.0268209	4	2.40262	0.0966032	0.169043	0.141859	Not Significant	Not Significant	2.09426	1.59229
P48962	ADP/ATP translocase 1	Slc25a4	220550000	257750000	301680000	177530000	167150000	185600000	0.546231	3.9696	2.87903	0.0165442	0.0261238	0.0515741	0.0502494	4	2.40262	0.0966032	0.0284022	0.053995	Not Significant	Not Significant	1.58296	1.78135
Q3UMW7	MAP kinase-activated protein kinase 3;MAP kinase-activated protein kinase 2;Testis-specific serine/threonine-protein kinase 3;cAMP-dependent protein kinase catalytic subunit PRKX	Mapkapk3	0	7626100	6392500	0	5730400	5656800	0.924409	1.96626	2.29492	0.120686	0.0588222	0.138116	0.083979	4	2.40262	0.0966032	0.331542	0.24338	Not Significant	Not Significant	1.23046	0.918343
P49182	Heparin cofactor 2	Serpind1	57749000	366130000	281130000	12634000	10180000	41765000	3.37063	3.22366	4.00818	0.0321685	0.00617112	0.0667758	0.0239168	4	2.40262	0.0966032	1.63989	1.06077	Significant	Significant	2.20964	1.49257
P49300	C-type lectin domain family 10 member A	Clec10a	52439000	101030000	70918000	6213700	0	10763000	3.28762	8.53194	9.61435	0.00103561	4.87434e-05	0.0207551	0.00281342	4	2.40262	0.0966032	0.22272	0.175394	Significant	Significant	4.31208	2.9848
P49312	Heterogeneous nuclear ribonucleoprotein A1;Heterogeneous nuclear ribonucleoprotein A1, N-terminally processed	Hnrnpa1	143950000	171630000	148220000	76272000	123520000	110650000	0.604212	2.6902	2.56054	0.0546469	0.0405003	0.0851245	0.066518	4	2.40262	0.0966032	0.0756662	0.0835229	Not Significant	Not Significant	1.39254	1.26243
P49442	Inositol polyphosphate 1-phosphatase	Inpp1	0	0	10901000	0	12234000	9331200	0.12596	0.681338	0.590384	0.533061	0.575167	0.361548	0.369159	4	2.40262	0.0966032	0.0512666	0.0682794	Not Significant	Not Significant	0.240206	0.273223
P49443	Protein phosphatase 1A	Ppm1a	13831000	0	15013000	14516000	0	0	0.519932	0.793273	0.961277	0.472019	0.371298	0.335534	0.282541	4	2.40262	0.0966032	0.644376	0.438821	Not Significant	Not Significant	0.430277	0.326041
P49446	Receptor-type tyrosine-protein phosphatase epsilon	Ptpre	4242000	5016500	4284300	4742600	0	0	-0.58007	-2.02814	-2.11428	0.11245	0.0760073	0.132498	0.0981131	4	2.40262	0.0966032	0.122703	0.112909	Not Significant	Not Significant	1.11914	0.94904
P49586	Choline-phosphate cytidylyltransferase A	Pcyt1a	246040000	356820000	378390000	131360000	338620000	272830000	0.484256	1.06013	1.2319	0.348855	0.261303	0.282	0.225587	4	2.40262	0.0966032	0.312984	0.231786	Not Significant	Not Significant	0.582856	0.457355
P49615	Cyclin-dependent-like kinase 5	Cdk5	25858000	33308000	24088000	29917000	25213000	0	0.571697	0.964618	1.15829	0.389361	0.288118	0.30041	0.239682	4	2.40262	0.0966032	0.526881	0.365417	Not Significant	Not Significant	0.540429	0.409647
P49717	DNA replication licensing factor MCM4	Mcm4	21468000	18226000	11593000	17571000	20732000	15654000	-0.110049	-0.378569	-0.396689	0.724243	0.704483	0.43222	0.415221	4	2.40262	0.0966032	0.126758	0.115442	Not Significant	Not Significant	0.152129	0.140115
P49718	DNA replication licensing factor MCM5	Mcm5	31305000	36793000	34826000	47315000	30086000	30689000	-0.0410408	-0.183354	-0.174259	0.863439	0.867043	0.473622	0.464884	4	2.40262	0.0966032	0.0751523	0.0832019	Not Significant	Not Significant	0.0619596	0.0637682
P49722	Proteasome subunit alpha type-2	Psma2	345010000	271070000	312810000	451510000	349140000	331400000	-0.278849	-1.63106	-1.35378	0.178213	0.221644	0.179347	0.201131	4	2.40262	0.0966032	0.043842	0.0636409	Not Significant	Not Significant	0.654343	0.749061
P49817	Caveolin-1	Cav1	26261000	100580000	114100000	33988000	27837000	29613000	1.14239	1.67146	2.0322	0.169951	0.0854231	0.1738	0.105543	4	2.40262	0.0966032	0.700694	0.474005	Not Significant	Not Significant	1.06842	0.769677
P49891	Estrogen sulfotransferase, testis isoform	Sult1e1	15793000	26789000	33138000	305800000	302150000	330190000	-3.69584	-11.5361	-12.4382	0.000322452	1.00986e-05	0.0186422	0.00116575	4	2.40262	0.0966032	0.153957	0.132434	Significant	Significant	4.99574	3.49154
P49962	Signal recognition particle 9 kDa protein	Srp9	14111000	27084000	22497000	15629000	37877000	31569000	-0.373354	-0.778679	-0.911457	0.479662	0.395075	0.338315	0.293559	4	2.40262	0.0966032	0.344839	0.251687	Not Significant	Not Significant	0.403321	0.319065
P50136	2-oxoisovalerate dehydrogenase subunit alpha, mitochondrial	Bckdha	23101000	30739000	49809000	19967000	23816000	25511000	0.514588	1.51274	1.65687	0.204892	0.145504	0.196709	0.152597	4	2.40262	0.0966032	0.173572	0.144689	Not Significant	Not Significant	0.837126	0.688475
P50171	Estradiol 17-beta-dehydrogenase 8	Hsd17b8	12492000	9053600	15443000	14494000	0	12850000	0.154712	0.38088	0.43371	0.722657	0.678734	0.432173	0.406417	4	2.40262	0.0966032	0.247494	0.190871	Not Significant	Not Significant	0.168301	0.141068
P50247	Adenosylhomocysteinase	Ahcy	369960000	581740000	473090000	335030000	430590000	400180000	0.272868	1.2563	1.17817	0.277376	0.280656	0.24049	0.235747	4	2.40262	0.0966032	0.0707638	0.0804602	Not Significant	Not Significant	0.551825	0.556932
P50289	Acrosomal protein SP-10	Acrv1	3983000	0	0	15314000	0	0	-0.644716	-1.21211	-1.43834	0.292169	0.197367	0.249298	0.186226	4	2.40262	0.0966032	0.42437	0.301373	Not Significant	Not Significant	0.704725	0.534366
P50396	Rab GDP dissociation inhibitor alpha	Gdi1	67862000	105320000	80748000	61926000	55105000	49567000	0.59021	2.85968	2.61916	0.0459444	0.0373292	0.0777598	0.0633845	4	2.40262	0.0966032	0.0638955	0.0761692	Not Significant	Not Significant	1.42795	1.33777
P50427	Steryl-sulfatase	Sts	30600000	38925000	49781000	17337000	22928000	16459000	1.05999	4.21881	4.20294	0.0134904	0.00490563	0.0485815	0.0210776	4	2.40262	0.0966032	0.0946929	0.0954097	Not Significant	Not Significant	2.30931	1.86997
P50428	Arylsulfatase A	Arsa	0	28393000	34565000	0	62089000	46549000	-0.607624	-0.479881	-0.599937	0.656373	0.569161	0.409521	0.366323	4	2.40262	0.0966032	2.40488	1.53869	Not Significant	Not Significant	0.244765	0.182849
P50431	Serine hydroxymethyltransferase, cytosolic	Shmt1	126480000	112410000	122860000	178040000	234530000	228600000	-0.816701	-5.97208	-4.31334	0.00394946	0.00431812	0.0302545	0.0199856	4	2.40262	0.0966032	0.0280522	0.0537764	Not Significant	Not Significant	2.3647	2.40346
P50516	V-type proton ATPase catalytic subunit A	Atp6v1a	545640000	436910000	565130000	279430000	291870000	246240000	0.91533	6.65453	4.82506	0.00264834	0.00244702	0.02801	0.0160362	4	2.40262	0.0966032	0.02838	0.0539811	Not Significant	Not Significant	2.61136	2.57703
P50518	V-type proton ATPase subunit E 1	Atp6v1e1	186860000	148030000	101630000	71865000	82286000	73272000	0.899253	3.41752	3.4632	0.0268412	0.0120946	0.06135	0.0324692	4	2.40262	0.0966032	0.103856	0.101134	Not Significant	Not Significant	1.91741	1.5712
P50543	Protein S100-A11	S100a11	50107000	86307000	123100000	43234000	37405000	61767000	0.804672	1.85378	2.13628	0.137387	0.0736662	0.150621	0.0962442	4	2.40262	0.0966032	0.282626	0.21282	Not Significant	Not Significant	1.13273	0.862056
P50544	Very long-chain specific acyl-CoA dehydrogenase, mitochondrial	Acadvl	199650000	256110000	288400000	202680000	220230000	202740000	0.234821	1.4554	1.16783	0.219258	0.284515	0.206492	0.237851	4	2.40262	0.0966032	0.039048	0.0606459	Not Significant	Not Significant	0.545895	0.659044
P50580	Proliferation-associated protein 2G4	Pa2g4	229630000	130230000	181490000	263680000	235480000	205090000	-0.410129	-1.58066	-1.59369	0.18911	0.159008	0.187557	0.161418	4	2.40262	0.0966032	0.100984	0.0993403	Not Significant	Not Significant	0.79858	0.723286
P50608	Fibromodulin	Fmod	36682000	306230000	369480000	25078000	38215000	183010000	1.52154	1.10306	1.38159	0.331899	0.213378	0.272316	0.196381	4	2.40262	0.0966032	2.85403	1.81929	Not Significant	Not Significant	0.670851	0.478995
P51125	Calpastatin	Cast	33668000	20276000	20439000	43952000	34310000	47434000	-0.786001	-2.80637	-2.90565	0.0484957	0.025197	0.0798573	0.0488269	4	2.40262	0.0966032	0.117665	0.109761	Not Significant	Not Significant	1.59865	1.3143
P51150	Ras-related protein Rab-7a	Rab7a	384150000	396910000	453390000	134600000	169420000	171190000	1.38212	10.2547	7.33387	0.000509822	0.000242625	0.0186422	0.00543655	4	2.40262	0.0966032	0.0272481	0.053274	Not Significant	Not Significant	3.61507	3.29258
P51174	Long-chain specific acyl-CoA dehydrogenase, mitochondrial	Acadl	276720000	348200000	439470000	254160000	277630000	258520000	0.404977	2.06032	1.84262	0.108413	0.11187	0.129669	0.127322	4	2.40262	0.0966032	0.0579537	0.0724571	Not Significant	Not Significant	0.951285	0.96492
P51410	60S ribosomal protein L9	Rpl9	172110000	186110000	166960000	199360000	202860000	180050000	-0.148423	-2.08702	-0.897853	0.105184	0.401764	0.126721	0.297435	4	2.40262	0.0966032	0.00758646	0.0409905	Not Significant	Not Significant	0.396029	0.97805
P51569	Alpha-galactosidase A	Gla	28501000	14152000	23282000	0	7900300	0	1.4539	4.64791	4.97814	0.00967655	0.00207961	0.0419588	0.0151393	4	2.40262	0.0966032	0.146773	0.127947	Not Significant	Not Significant	2.68202	2.01428
P51655	Glypican-4;Secreted glypican-4	Gpc4	5416400	0	0	7615300	0	0	0.944581	1.75832	2.08897	0.153517	0.0787931	0.16162	0.100505	4	2.40262	0.0966032	0.432885	0.306693	Not Significant	Not Significant	1.10351	0.813843
P51660	Peroxisomal multifunctional enzyme type 2;(3R)-hydroxyacyl-CoA dehydrogenase;Enoyl-CoA hydratase 2	Hsd17b4	222840000	286140000	247800000	258310000	343200000	314690000	-0.273393	-1.70743	-1.36382	0.16293	0.218626	0.168295	0.199536	4	2.40262	0.0966032	0.0384572	0.0602768	Not Significant	Not Significant	0.660298	0.788
P51807	Dynein light chain Tctex-type 1	Dynlt1	139640000	58426000	72619000	201400000	117480000	131240000	-0.796624	-1.78618	-2.06769	0.14861	0.0812157	0.157972	0.102303	4	2.40262	0.0966032	0.298364	0.222652	Not Significant	Not Significant	1.09036	0.827952
P51855	Glutathione synthetase	Gss	14476000	22309000	17110000	14506000	23228000	17615000	-0.0343968	-0.128334	-0.130901	0.904079	0.899871	0.48385	0.474779	4	2.40262	0.0966032	0.107758	0.103572	Not Significant	Not Significant	0.04582	0.0437938
P51859	Hepatoma-derived growth factor	Hdgf	177040000	183030000	200020000	207460000	223260000	213290000	-0.202692	-3.32572	-1.24541	0.029222	0.256623	0.0636913	0.2227	4	2.40262	0.0966032	0.00557173	0.0397318	Not Significant	Not Significant	0.590705	1.53429
P51863	V-type proton ATPase subunit d 1	Atp6v0d1	75486000	76707000	80524000	25624000	38664000	37710000	1.21385	6.25248	5.55703	0.00333647	0.00115622	0.0284036	0.0116418	4	2.40262	0.0966032	0.056535	0.0715708	Not Significant	Not Significant	2.93696	2.47671
P51881	ADP/ATP translocase 2;ADP/ATP translocase 2, N-terminally processed	Slc25a5	1133200000	1150100000	1700900000	666110000	765920000	746400000	0.847114	4.20256	3.80553	0.0136676	0.00788378	0.0485815	0.0268209	4	2.40262	0.0966032	0.0609462	0.0743267	Not Significant	Not Significant	2.10327	1.86431
P51885	Lumican	Lum	1041100000	2921100000	3577600000	354610000	142630000	942610000	2.61141	2.71844	3.36939	0.0530723	0.0136416	0.084002	0.0347191	4	2.40262	0.0966032	1.38421	0.901027	Not Significant	Significant	1.86513	1.27513
P51949	CDK-activating kinase assembly factor MAT1	Mnat1	0	0	8027300	0	14245000	0	-0.353178	-1.00949	-1.11331	0.369848	0.305619	0.291793	0.24845	4	2.40262	0.0966032	0.183602	0.150955	Not Significant	Not Significant	0.51482	0.431977
P52194	Calmegin	Clgn	856750000	356070000	413350000	1325300000	1072600000	791520000	-1.0525	-2.35515	-2.72722	0.0780753	0.03215	0.106304	0.0573494	4	2.40262	0.0966032	0.299573	0.223408	Not Significant	Not Significant	1.49282	1.10749
P52196	Thiosulfate sulfurtransferase	Tst	158380000	199300000	280810000	206810000	239080000	235790000	-0.131792	-0.529011	-0.525313	0.624793	0.617056	0.397801	0.386978	4	2.40262	0.0966032	0.0930979	0.0944133	Not Significant	Not Significant	0.209675	0.204264
P52293	Importin subunit alpha-1	Kpna2	65508000	52127000	68875000	84351000	88290000	81953000	-0.45859	-3.59399	-2.47474	0.0228803	0.0456607	0.0577594	0.0719235	4	2.40262	0.0966032	0.0244223	0.0515086	Not Significant	Not Significant	1.34046	1.64054
P52430	Serum paraoxonase/arylesterase 1	Pon1	12329000	35182000	25422000	0	0	11460000	1.42565	2.02488	2.46735	0.112869	0.0461366	0.132638	0.0721807	4	2.40262	0.0966032	0.743563	0.500788	Not Significant	Not Significant	1.33595	0.947425
P52480	Pyruvate kinase PKM	Pkm	1931300000	2531400000	1827400000	1745200000	1963800000	1920500000	0.146926	0.951854	0.743487	0.395072	0.483568	0.303109	0.333835	4	2.40262	0.0966032	0.0357394	0.0585789	Not Significant	Not Significant	0.315542	0.403324
P52503	NADH dehydrogenase [ubiquinone] iron-sulfur protein 6, mitochondrial	Ndufs6	43854000	55122000	77412000	55197000	80817000	73076000	-0.266917	-0.921997	-0.964872	0.408708	0.369626	0.308813	0.282307	4	2.40262	0.0966032	0.125715	0.11479	Not Significant	Not Significant	0.432238	0.388587
P52825	Carnitine O-palmitoyltransferase 2, mitochondrial	Cpt2	453570000	333960000	466120000	540020000	506600000	479850000	-0.298247	-1.84247	-1.48132	0.1392	0.185979	0.152	0.179657	4	2.40262	0.0966032	0.0393048	0.0608063	Not Significant	Not Significant	0.730537	0.856361
P52840	Sulfotransferase 1A1	Sult1a1	0	20007000	17421000	14890000	13274000	14793000	0.264958	1.8482	1.37732	0.138277	0.214628	0.151496	0.196849	4	2.40262	0.0966032	0.0308281	0.0555106	Not Significant	Not Significant	0.668313	0.859249
P53026	60S ribosomal protein L10a	Rpl10a	308670000	263640000	360000000	313270000	265160000	223630000	0.219083	1.1461	1.0106	0.315658	0.348865	0.263058	0.272372	4	2.40262	0.0966032	0.0548107	0.0704935	Not Significant	Not Significant	0.457343	0.500783
P53395	Lipoamide acyltransferase component of branched-chain alpha-keto acid dehydrogenase complex, mitochondrial	Dbt	30618000	46899000	68199000	26103000	39129000	31915000	0.529	1.41472	1.58409	0.230062	0.16116	0.21365	0.162886	4	2.40262	0.0966032	0.20973	0.167279	Not Significant	Not Significant	0.792743	0.638155
P53702	Cytochrome c-type heme lyase	Hccs	0	5926700	7743900	0	6184700	5921900	0.024191	0.0875634	0.0902483	0.934432	0.930848	0.49172	0.483254	4	2.40262	0.0966032	0.114486	0.107775	Not Significant	Not Significant	0.0311214	0.0294522
P53810	Phosphatidylinositol transfer protein alpha isoform	Pitpna	108770000	130890000	138380000	72834000	97766000	86067000	0.56155	3.47283	2.7903	0.0255179	0.0294837	0.0604994	0.0540856	4	2.40262	0.0966032	0.0392195	0.060753	Not Significant	Not Significant	1.53042	1.59316
P53811	Phosphatidylinositol transfer protein beta isoform	Pitpnb	0	14084000	0	0	10153000	9404000	-0.390581	-0.557039	-0.678559	0.607197	0.521177	0.391166	0.348114	4	2.40262	0.0966032	0.737467	0.49698	Not Significant	Not Significant	0.283014	0.21667
P53986	Monocarboxylate transporter 1	Slc16a1	52704000	63731000	49098000	60236000	65899000	59594000	-0.173493	-1.42907	-0.949663	0.226192	0.37674	0.210847	0.284647	4	2.40262	0.0966032	0.0221079	0.0500627	Not Significant	Not Significant	0.423958	0.645522
P53994	Ras-related protein Rab-2A	Rab2a	260560000	296040000	266890000	363360000	489340000	411360000	-0.609662	-4.45789	-3.21982	0.0111785	0.0165721	0.0445697	0.0381674	4	2.40262	0.0966032	0.0280551	0.0537781	Not Significant	Not Significant	1.78062	1.95162
P53996	Cellular nucleic acid-binding protein	Cnbp	111000000	60509000	110000000	125950000	97684000	118050000	-0.325053	-1.04919	-1.12065	0.3533	0.302703	0.283779	0.247324	4	2.40262	0.0966032	0.143977	0.1262	Not Significant	Not Significant	0.518983	0.451856
P54071	Isocitrate dehydrogenase [NADP], mitochondrial	Idh2	116080000	210540000	253200000	62693000	83965000	105600000	1.15888	2.87357	3.26767	0.0453054	0.0155665	0.076916	0.0372045	4	2.40262	0.0966032	0.243964	0.188666	Not Significant	Not Significant	1.80781	1.34385
P54103	DnaJ homolog subfamily C member 2;DnaJ homolog subfamily C member 2, N-terminally processed	Dnajc2	21687000	11477000	20615000	35277000	26770000	23036000	-0.694655	-2.01199	-2.2118	0.114539	0.0661739	0.133313	0.0908775	4	2.40262	0.0966032	0.178805	0.147958	Not Significant	Not Significant	1.17931	0.941047
P54116	Erythrocyte band 7 integral membrane protein	Stom	22060000	19309000	15965000	19520000	23789000	20710000	-0.166652	-1.04414	-0.832407	0.355364	0.435123	0.28488	0.314919	4	2.40262	0.0966032	0.0382113	0.0601232	Not Significant	Not Significant	0.361388	0.449326
P54227	Stathmin	Stmn1	338140000	194660000	202070000	430160000	387940000	464730000	-0.847889	-3.165	-3.22777	0.0340203	0.0164002	0.0681168	0.0380421	4	2.40262	0.0966032	0.107652	0.103506	Not Significant	Not Significant	1.78515	1.46826
P54310	Hormone-sensitive lipase	Lipe	15518000	8073500	13438000	37135000	31603000	16460000	-1.17343	-2.55734	-2.97379	0.0628146	0.0229822	0.0923338	0.0461393	4	2.40262	0.0966032	0.315809	0.233551	Not Significant	Not Significant	1.63861	1.20194
P54726	UV excision repair protein RAD23 homolog A	Rad23a	34922000	29966000	28267000	40813000	43354000	42951000	-0.453768	-4.7819	-2.62892	0.00876336	0.0368271	0.0404266	0.0631819	4	2.40262	0.0966032	0.013507	0.0446893	Not Significant	Not Significant	1.43383	2.05733
P54728	UV excision repair protein RAD23 homolog B	Rad23b	55441000	75111000	89217000	59793000	70863000	61808000	0.168164	0.785069	0.731617	0.476304	0.490305	0.336959	0.335903	4	2.40262	0.0966032	0.0688246	0.0792487	Not Significant	Not Significant	0.309534	0.322116
P54729	NEDD8 ultimate buster 1	Nub1	4946800	0	0	6323300	0	0	0.296487	0.520165	0.622102	0.630411	0.555369	0.398951	0.361343	4	2.40262	0.0966032	0.487326	0.340705	Not Significant	Not Significant	0.255418	0.200376
P54731	FAS-associated factor 1	Faf1	9978800	9119400	11499000	10426000	11254000	9544400	-0.0326309	-0.273871	-0.179529	0.797744	0.86307	0.45525	0.464132	4	2.40262	0.0966032	0.0212939	0.0495541	Not Significant	Not Significant	0.0639537	0.0981363
P54775	26S protease regulatory subunit 6B	Psmc4	189150000	156320000	105580000	181320000	191100000	145690000	-0.231133	-0.840135	-0.864673	0.448116	0.418432	0.326288	0.306268	4	2.40262	0.0966032	0.113531	0.107179	Not Significant	Not Significant	0.378375	0.348609
P54822	Adenylosuccinate lyase	Adsl	153490000	123420000	138730000	173390000	177350000	168030000	-0.325113	-3.47153	-1.88819	0.0255481	0.104854	0.0604994	0.121649	4	2.40262	0.0966032	0.0131558	0.0444699	Not Significant	Not Significant	0.979416	1.59264
P54823	Probable ATP-dependent RNA helicase DDX6	Ddx6	122290000	102960000	104350000	150090000	128130000	124880000	-0.290053	-2.52136	-1.61053	0.0652619	0.155296	0.0945776	0.158546	4	2.40262	0.0966032	0.0198506	0.0486524	Not Significant	Not Significant	0.80884	1.18534
P54869	Hydroxymethylglutaryl-CoA synthase, mitochondrial	Hmgcs2	1015100000	1284300000	1920100000	1246800000	1100500000	1134200000	0.228574	0.834524	0.857609	0.450927	0.422046	0.327464	0.308215	4	2.40262	0.0966032	0.112529	0.106553	Not Significant	Not Significant	0.37464	0.345894
P54923	[Protein ADP-ribosylarginine] hydrolase	Adprh	120360000	88801000	111940000	128950000	172070000	161180000	-0.526584	-2.88249	-2.48187	0.0449007	0.0452072	0.0767043	0.0714198	4	2.40262	0.0966032	0.0500601	0.0675256	Not Significant	Not Significant	1.34479	1.34775
P55096	ATP-binding cassette sub-family D member 3	Abcd3	144640000	179720000	161370000	137950000	117290000	91168000	0.502588	2.56478	2.29025	0.062322	0.0592122	0.0920212	0.0843867	4	2.40262	0.0966032	0.0575992	0.0722356	Not Significant	Not Significant	1.22759	1.20536
P55264	Adenosine kinase	Adk	116550000	136400000	164220000	110270000	109070000	122580000	0.274801	1.79933	1.39619	0.146352	0.209151	0.156891	0.194038	4	2.40262	0.0966032	0.0349869	0.0581088	Not Significant	Not Significant	0.67954	0.834602
P55302	Alpha-2-macroglobulin receptor-associated protein	Lrpap1	304270000	329920000	368480000	252970000	247010000	261040000	0.393749	4.72579	2.33219	0.00913244	0.0558032	0.0409653	0.0811018	4	2.40262	0.0966032	0.0104132	0.0427564	Not Significant	Not Significant	1.25334	2.03941
P55772	Ectonucleoside triphosphate diphosphohydrolase 1	Entpd1	0	32647000	17798000	0	11709000	13363000	0.694516	1.5279	1.7741	0.201258	0.123293	0.194724	0.135642	4	2.40262	0.0966032	0.309933	0.22988	Not Significant	Not Significant	0.90906	0.696247
P55937	Golgin subfamily A member 3	Golga3	32719000	27261000	26813000	44784000	33095000	32980000	-0.343763	-1.98906	-1.6611	0.117578	0.144639	0.135788	0.152184	4	2.40262	0.0966032	0.0448038	0.0642418	Not Significant	Not Significant	0.839715	0.929676
P56212	cAMP-regulated phosphoprotein 19	Arpp19	21244000	22100000	13484000	19120000	25655000	0	0.542494	0.643448	0.792784	0.554968	0.456268	0.370622	0.323028	4	2.40262	0.0966032	1.06624	0.702378	Not Significant	Not Significant	0.34078	0.255732
P56375	Acylphosphatase-2	Acyp2	13137000	22038000	26798000	14267000	16358000	18690000	0.276937	0.847475	0.918641	0.444461	0.391577	0.325381	0.292304	4	2.40262	0.0966032	0.160176	0.13632	Not Significant	Not Significant	0.407183	0.352166
P56376	Acylphosphatase-1	Acyp1	403470000	220420000	296930000	485670000	622150000	672820000	-0.98154	-3.39706	-3.55285	0.0273514	0.0107938	0.0619134	0.0307116	4	2.40262	0.0966032	0.125228	0.114486	Not Significant	Not Significant	1.96683	1.56302
P56380	Bis(5-nucleosyl)-tetraphosphatase [asymmetrical]	Nudt2	35156000	37482000	47646000	24409000	31190000	33122000	0.438679	2.31337	2.03144	0.0817292	0.085516	0.109465	0.105543	4	2.40262	0.0966032	0.053938	0.0699483	Not Significant	Not Significant	1.06795	1.08762
P56382	ATP synthase subunit epsilon, mitochondrial	Atp5e	24049000	0	0	0	5768100	0	1.05236	1.33433	1.63799	0.252989	0.149419	0.226427	0.154795	4	2.40262	0.0966032	0.933015	0.619147	Not Significant	Not Significant	0.825593	0.596899
P56390	Cyclin-dependent kinases regulatory subunit 2	Cks2	0	16646000	22195000	0	29996000	28342000	-0.46409	-0.553381	-0.681627	0.609475	0.519359	0.392196	0.347701	4	2.40262	0.0966032	1.05499	0.695349	Not Significant	Not Significant	0.284533	0.215044
P56391	Cytochrome c oxidase subunit 6B1	Cox6b1	85729000	3614600	68458000	41066000	12373000	0	0.907236	0.543332	0.682688	0.615763	0.518731	0.394827	0.347568	4	2.40262	0.0966032	4.18216	2.64903	Not Significant	Not Significant	0.285058	0.210586
P56395	Cytochrome b5	Cyb5a	351740000	335790000	431750000	201900000	182630000	192770000	0.947607	7.96311	5.21528	0.00134737	0.0016265	0.0225059	0.0132086	4	2.40262	0.0966032	0.0212413	0.0495213	Not Significant	Not Significant	2.78875	2.87051
P56399	Ubiquitin carboxyl-terminal hydrolase 5	Usp5	436890000	402180000	381390000	481770000	519540000	468320000	-0.268899	-3.71131	-1.62309	0.0206304	0.152583	0.0556936	0.157066	4	2.40262	0.0966032	0.00787433	0.0411703	Not Significant	Not Significant	0.816495	1.68549
P56480	ATP synthase subunit beta, mitochondrial	Atp5b	1884800000	2093300000	2669100000	1759800000	1790000000	1776900000	0.303937	2.04227	1.55907	0.110658	0.1669	0.131398	0.166193	4	2.40262	0.0966032	0.0332225	0.0570064	Not Significant	Not Significant	0.777544	0.956018
P56565	Protein S100-A1	S100a1	0	60670000	23141000	0	13109000	18793000	0.801815	0.665787	0.83132	0.541977	0.435694	0.365333	0.31505	4	2.40262	0.0966032	2.17555	1.39542	Not Significant	Not Significant	0.360818	0.266019
P56812	Programmed cell death protein 5	Pdcd5	124430000	81158000	95028000	126650000	174060000	190230000	-0.709204	-2.80036	-2.7982	0.0487937	0.0291666	0.0801072	0.0536867	4	2.40262	0.0966032	0.096207	0.0963557	Not Significant	Not Significant	1.53511	1.31164
P56873	Sjoegren syndrome/scleroderma autoantigen 1 homolog	Sssca1	29897000	22936000	15454000	42685000	48352000	42710000	-1.01876	-3.60008	-3.74008	0.0227566	0.00854418	0.0576242	0.0274646	4	2.40262	0.0966032	0.120119	0.111295	Not Significant	Not Significant	2.06833	1.64289
P56959	RNA-binding protein FUS	Fus	203070000	172860000	188160000	215450000	216910000	239690000	-0.254026	-3.04122	-1.50403	0.0383563	0.180205	0.0715315	0.175548	4	2.40262	0.0966032	0.0104653	0.042789	Not Significant	Not Significant	0.744232	1.41616
P57716	Nicastrin	Ncstn	58267000	33164000	59884000	22638000	30248000	30570000	0.822255	2.63534	2.82053	0.0578619	0.0282898	0.0879648	0.0525516	4	2.40262	0.0966032	0.146027	0.12748	Not Significant	Not Significant	1.54837	1.23761
P57722	Poly(rC)-binding protein 3	Pcbp3	96466000	64649000	104890000	126120000	168750000	179100000	-0.847593	-3.18436	-3.24015	0.0333958	0.0161364	0.0678107	0.0378414	4	2.40262	0.0966032	0.106273	0.102644	Not Significant	Not Significant	1.79219	1.47631
P57746	V-type proton ATPase subunit D	Atp6v1d	41132000	36824000	38334000	18942000	31314000	32234000	0.534184	2.10868	2.10728	0.102643	0.076768	0.125322	0.098544	4	2.40262	0.0966032	0.0962614	0.0963897	Not Significant	Not Significant	1.11482	0.98867
P57759	Endoplasmic reticulum resident protein 29	Erp29	150180000	129210000	192990000	149110000	180530000	175490000	-0.111689	-0.589556	-0.51745	0.587179	0.62223	0.383532	0.388746	4	2.40262	0.0966032	0.053835	0.069884	Not Significant	Not Significant	0.206049	0.23123
P57776	Elongation factor 1-delta	Eef1d	410740000	440590000	304900000	425170000	542670000	541550000	-0.39307	-1.96141	-1.77106	0.121358	0.123824	0.138214	0.136041	4	2.40262	0.0966032	0.0602411	0.0738862	Not Significant	Not Significant	0.907195	0.915933
P57780	Alpha-actinin-4	Actn4	511460000	1162100000	978150000	227680000	270230000	397930000	1.52321	3.5253	4.05933	0.0243334	0.0058069	0.0594195	0.0229107	4	2.40262	0.0966032	0.280039	0.211204	Not Significant	Not Significant	2.23606	1.6138
P57784	U2 small nuclear ribonucleoprotein A	Snrpa1	61719000	61288000	58408000	53113000	72064000	76218000	-0.133663	-0.815898	-0.660646	0.460356	0.531878	0.331238	0.352292	4	2.40262	0.0966032	0.0402573	0.0614014	Not Significant	Not Significant	0.274188	0.336906
P58021	Transmembrane 9 superfamily member 2	Tm9sf2	44684000	38998000	30855000	51639000	55176000	48435000	-0.453296	-2.74411	-2.23283	0.0516866	0.0642292	0.083276	0.089408	4	2.40262	0.0966032	0.0409311	0.0618224	Not Significant	Not Significant	1.19227	1.28662
P58044	Isopentenyl-diphosphate Delta-isomerase 1	Idi1	101550000	84957000	107420000	171260000	236890000	220070000	-1.08937	-6.24001	-5.24075	0.00336112	0.00158483	0.0284036	0.0132086	4	2.40262	0.0966032	0.0457163	0.0648119	Not Significant	Not Significant	2.80002	2.47352
P58137	Acyl-coenzyme A thioesterase 8	Acot8	0	3561400	0	0	4560900	0	-0.601539	-1.17525	-1.38794	0.305076	0.211528	0.256875	0.19557	4	2.40262	0.0966032	0.392971	0.281757	Not Significant	Not Significant	0.674631	0.515592
P58252	Elongation factor 2	Eef2	2057700000	1942800000	1920700000	1876200000	1865100000	1731100000	0.114016	2.35607	0.712176	0.077997	0.501473	0.106285	0.34038	4	2.40262	0.0966032	0.00351272	0.0384454	Not Significant	Not Significant	0.299753	1.10792
P58281	Dynamin-like 120 kDa protein, mitochondrial;Dynamin-like 120 kDa protein, form S1	Opa1	47772000	69338000	58732000	39536000	54980000	49346000	0.286317	1.36847	1.26148	0.24299	0.25115	0.221618	0.21926	4	2.40262	0.0966032	0.0656621	0.0772729	Not Significant	Not Significant	0.600068	0.614412
P58389	Serine/threonine-protein phosphatase 2A activator	Ptpa	431580000	334230000	355400000	614010000	673120000	609770000	-0.765826	-6.36747	-4.20274	0.00311922	0.00490674	0.0284036	0.0210776	4	2.40262	0.0966032	0.0216979	0.0498065	Not Significant	Not Significant	2.30921	2.50595
P58771	Tropomyosin alpha-1 chain	Tpm1	493790000	1217900000	694030000	406720000	364670000	480790000	0.849728	2.14004	2.42618	0.0990833	0.0488817	0.122986	0.0742473	4	2.40262	0.0966032	0.236487	0.183995	Not Significant	Not Significant	1.31085	1.004
P59016	Vacuolar protein sorting-associated protein 33B	Vps33b	4546100	0	0	6721600	0	0	-0.156635	-0.313246	-0.368805	0.769748	0.724163	0.446051	0.422811	4	2.40262	0.0966032	0.375057	0.270566	Not Significant	Not Significant	0.140163	0.113651
P59017	Bcl-2-like protein 13	Bcl2l13	10176000	0	15283000	7549600	0	0	0.708757	2.43102	2.54971	0.0719014	0.0411165	0.100677	0.0670531	4	2.40262	0.0966032	0.127499	0.115905	Not Significant	Not Significant	1.38598	1.14326
P59242	Cingulin	Cgn	94139000	102710000	81906000	116730000	121220000	98488000	-0.27178	-2.05254	-1.45023	0.109374	0.194155	0.130354	0.185339	4	2.40262	0.0966032	0.0262992	0.0526812	Not Significant	Not Significant	0.711852	0.961086
P59279	Ras-related protein Rab-2B	Rab2b	28034000	39842000	0	31651000	12473000	57864000	-0.289988	-0.343451	-0.423193	0.748552	0.686003	0.439901	0.4085	4	2.40262	0.0966032	1.06936	0.704328	Not Significant	Not Significant	0.163674	0.125778
P59325	Eukaryotic translation initiation factor 5	Eif5	112650000	83207000	99757000	160830000	161100000	144790000	-0.668114	-4.88305	-3.528	0.00814269	0.0111384	0.0392424	0.0311203	4	2.40262	0.0966032	0.0280808	0.0537942	Not Significant	Not Significant	1.95318	2.08923
P59326	YTH domain-containing family protein 1;YTH domain-containing family protein 2	Ythdf1	0	13524000	12365000	0	9218500	0	0.0274225	0.058734	0.0684804	0.955981	0.947492	0.497484	0.487532	4	2.40262	0.0966032	0.326984	0.240533	Not Significant	Not Significant	0.0234243	0.0195507
P59708	Splicing factor 3B subunit 6	Sf3b6	16808000	26605000	20817000	20868000	32134000	28487000	-0.345696	-1.29677	-1.32021	0.264457	0.232	0.23294	0.207609	4	2.40262	0.0966032	0.106599	0.102848	Not Significant	Not Significant	0.634511	0.577645
P59999	Actin-related protein 2/3 complex subunit 4	Arpc4	92371000	159570000	105430000	44090000	59820000	57102000	1.12238	4.09329	4.2081	0.0149348	0.00487622	0.0492847	0.0210776	4	2.40262	0.0966032	0.112779	0.106709	Not Significant	Not Significant	2.31192	1.8258
P60122	RuvB-like 1	Ruvbl1	229380000	191830000	206600000	263370000	304520000	320240000	-0.499458	-4.42385	-2.78637	0.0114766	0.0296425	0.0447995	0.0541925	4	2.40262	0.0966032	0.01912	0.048196	Not Significant	Not Significant	1.52808	1.94019
P60229	Eukaryotic translation initiation factor 3 subunit E	Eif3e	105130000	118430000	142430000	105700000	133590000	119890000	0.0223211	0.139048	0.111236	0.896132	0.914835	0.481376	0.478786	4	2.40262	0.0966032	0.0386542	0.0603999	Not Significant	Not Significant	0.038657	0.0476279
P60335	Poly(rC)-binding protein 1	Pcbp1	480570000	373610000	435300000	586050000	591340000	682630000	-0.532609	-4.17878	-2.87514	0.013932	0.0262621	0.0485815	0.0503474	4	2.40262	0.0966032	0.0243673	0.0514743	Not Significant	Not Significant	1.58067	1.85599
P60605	Ubiquitin-conjugating enzyme E2 G2	Ube2g2	0	14404000	11657000	0	17460000	16943000	-0.642965	-1.3129	-1.54138	0.259472	0.171074	0.229873	0.169454	4	2.40262	0.0966032	0.359751	0.261003	Not Significant	Not Significant	0.766817	0.58591
P60670	Nuclear protein localization protein 4 homolog	Nploc4	188360000	143080000	185080000	202930000	208230000	196880000	-0.246004	-1.88769	-1.31915	0.132103	0.232335	0.14649	0.207793	4	2.40262	0.0966032	0.0254752	0.0521664	Not Significant	Not Significant	0.633886	0.879087
P60762	Mortality factor 4-like protein 1	Morf4l1	21058000	0	28379000	33336000	30249000	28251000	-0.657944	-1.79963	-2.0051	0.146302	0.0887833	0.156891	0.108297	4	2.40262	0.0966032	0.200495	0.161509	Not Significant	Not Significant	1.05167	0.834751
P60766	Cell division control protein 42 homolog	Cdc42	386800000	265520000	231420000	208570000	136120000	178130000	0.744194	2.609	2.71744	0.0594827	0.0325858	0.0895999	0.057681	4	2.40262	0.0966032	0.122044	0.112497	Not Significant	Not Significant	1.48697	1.22561
P60824	Cold-inducible RNA-binding protein	Cirbp	205440000	136520000	110190000	300890000	370160000	362080000	-1.23529	-4.40959	-4.56591	0.0116043	0.0032471	0.0449711	0.0182093	4	2.40262	0.0966032	0.117715	0.109793	Not Significant	Not Significant	2.4885	1.93538
P60843	Eukaryotic initiation factor 4A-I	Eif4a1	549970000	486330000	423860000	566660000	543960000	567690000	-0.208737	-1.89111	-1.17093	0.131581	0.283354	0.14637	0.23715	4	2.40262	0.0966032	0.0182749	0.047668	Not Significant	Not Significant	0.54767	0.880806
P60867	40S ribosomal protein S20	Rps20	240650000	129960000	231960000	187760000	140850000	140370000	0.322199	1.00785	1.08603	0.370543	0.316654	0.292062	0.255239	4	2.40262	0.0966032	0.153301	0.132025	Not Significant	Not Significant	0.499415	0.431161
P61021	Ras-related protein Rab-5B	Rab5b	0	25266000	29132000	0	15748000	18827000	0.813131	1.36511	1.64001	0.243956	0.148997	0.221991	0.154556	4	2.40262	0.0966032	0.532202	0.368741	Not Significant	Not Significant	0.826822	0.612688
P61027	Ras-related protein Rab-10	Rab10	155050000	190590000	98981000	156470000	136920000	132350000	0.0149507	0.051804	0.0541597	0.961169	0.958459	0.498362	0.489104	4	2.40262	0.0966032	0.124935	0.114304	Not Significant	Not Significant	0.0184266	0.0172004
P61028	Ras-related protein Rab-8B	Rab8b	17664000	21016000	31177000	11076000	10444000	10164000	1.09973	4.48437	4.42592	0.010953	0.00379847	0.0441437	0.0189929	4	2.40262	0.0966032	0.0902118	0.0926102	Not Significant	Not Significant	2.42039	1.96047
P61079	Ubiquitin-conjugating enzyme E2 D3	Ube2d3	119240000	60129000	19396000	172360000	175650000	161340000	-1.71147	-2.2377	-2.74186	0.0888487	0.0315093	0.116021	0.0564557	4	2.40262	0.0966032	0.877457	0.584437	Not Significant	Not Significant	1.50156	1.05135
P61082	NEDD8-conjugating enzyme Ubc12	Ube2m	107530000	86518000	118500000	141060000	174160000	148650000	-0.575981	-3.54797	-2.85742	0.0238419	0.0269026	0.0589199	0.0511507	4	2.40262	0.0966032	0.0395318	0.0609482	Not Significant	Not Significant	1.57021	1.62266
P61087	Ubiquitin-conjugating enzyme E2 K	Ube2k	53526000	52679000	54151000	71170000	91189000	72180000	-0.539091	-4.62626	-2.98343	0.00983478	0.022686	0.0420897	0.0457797	4	2.40262	0.0966032	0.0203683	0.0489759	Not Significant	Not Significant	1.64424	2.00724
P61089	Ubiquitin-conjugating enzyme E2 N	Ube2n	371450000	312790000	481210000	406670000	461950000	442350000	-0.190585	-1.01099	-0.885066	0.369207	0.408128	0.291428	0.300906	4	2.40262	0.0966032	0.0533054	0.0695531	Not Significant	Not Significant	0.389204	0.43273
P61161	Actin-related protein 2	Actr2	170590000	223790000	210650000	79365000	81003000	100090000	1.21454	7.60013	6.06346	0.00160818	0.000715818	0.0225207	0.00948234	4	2.40262	0.0966032	0.0383062	0.0601825	Not Significant	Not Significant	3.1452	2.79367
P61164	Alpha-centractin	Actr1a	216020000	149950000	174980000	284380000	212840000	194470000	-0.351433	-1.56152	-1.48759	0.193427	0.184369	0.18989	0.178635	4	2.40262	0.0966032	0.0759768	0.083717	Not Significant	Not Significant	0.734313	0.713483
P61202	COP9 signalosome complex subunit 2	Cops2	154960000	146330000	153080000	201270000	213030000	187930000	-0.404992	-6.98054	-2.49871	0.00221512	0.0441536	0.0253875	0.0703034	4	2.40262	0.0966032	0.00504902	0.0394052	Not Significant	Not Significant	1.35503	2.6546
P61211	ADP-ribosylation factor-like protein 1	Arl1	39315000	48581000	47324000	55088000	65853000	63680000	-0.451261	-3.62737	-2.45323	0.0222116	0.0470596	0.0569462	0.0726403	4	2.40262	0.0966032	0.0232148	0.0507542	Not Significant	Not Significant	1.32735	1.65342
P61222	ATP-binding cassette sub-family E member 1	Abce1	40444000	57567000	60826000	62347000	80881000	74922000	-0.471885	-2.18989	-2.04634	0.0937034	0.0837212	0.119068	0.104401	4	2.40262	0.0966032	0.0696495	0.079764	Not Significant	Not Significant	1.07716	1.02824
P61226	Ras-related protein Rap-2b	Rap2b	21147000	31283000	31330000	0	9831000	11485000	1.7304	4.2027	4.79783	0.0136661	0.0025197	0.0485815	0.0161867	4	2.40262	0.0966032	0.254288	0.195116	Not Significant	Not Significant	2.59865	1.86436
P61255	60S ribosomal protein L26	Rpl26	68844000	79188000	87041000	112310000	100710000	91245000	-0.373662	-2.85332	-2.0007	0.0462405	0.0893413	0.0778601	0.108399	4	2.40262	0.0966032	0.0257247	0.0523222	Not Significant	Not Significant	1.04895	1.33498
P61290	Proteasome activator complex subunit 3	Psme3	65045000	53685000	84060000	56275000	70058000	69457000	0.0334042	0.156098	0.145405	0.883517	0.888861	0.477825	0.471452	4	2.40262	0.0966032	0.0686904	0.0791648	Not Significant	Not Significant	0.051166	0.0537853
Q9CQL1	Protein mago nashi homolog 2;Protein mago nashi homolog	Magohb	78453000	97921000	57072000	89764000	109950000	95169000	-0.366391	-1.5129	-1.48581	0.204855	0.184824	0.196709	0.178886	4	2.40262	0.0966032	0.0879756	0.0912132	Not Significant	Not Significant	0.733241	0.688554
P61358	60S ribosomal protein L27	Rpl27	65900000	67624000	108150000	93389000	82387000	88416000	-0.165734	-0.69609	-0.67897	0.5247	0.520933	0.356944	0.348114	4	2.40262	0.0966032	0.0850319	0.0893741	Not Significant	Not Significant	0.283218	0.280089
P61407	Tudor domain-containing protein 6	Tdrd6	330200000	146710000	218380000	513400000	566270000	567010000	-1.3206	-3.87052	-4.24246	0.0179856	0.00468563	0.0530653	0.0207162	4	2.40262	0.0966032	0.174621	0.145344	Not Significant	Not Significant	2.32923	1.74508
P61514	60S ribosomal protein L37a	Rpl37a	7784700	0	12149000	15047000	12013000	12166000	-0.438083	-2.04653	-1.90661	0.110123	0.102143	0.131047	0.119274	4	2.40262	0.0966032	0.0687333	0.0791916	Not Significant	Not Significant	0.990793	0.958121
P61620	Protein transport protein Sec61 subunit alpha isoform 1;Protein transport protein Sec61 subunit alpha isoform 2	Sec61a1	40179000	48370000	49522000	28191000	21566000	9078200	1.37472	2.73616	3.22351	0.0521112	0.016492	0.0834691	0.0381674	4	2.40262	0.0966032	0.378648	0.272809	Not Significant	Not Significant	1.78273	1.28307
P61750	ADP-ribosylation factor 4	Arf4	73920000	86569000	59789000	83886000	112400000	101980000	-0.443173	-2.23449	-2.00734	0.0891655	0.0885009	0.116021	0.108154	4	2.40262	0.0966032	0.059004	0.0731133	Not Significant	Not Significant	1.05305	1.0498
P61759	Prefoldin subunit 3	Vbp1	21815000	19560000	32800000	15645000	27191000	30694000	0.0333784	0.0888748	0.0996092	0.933453	0.923701	0.491566	0.481078	4	2.40262	0.0966032	0.211575	0.168431	Not Significant	Not Significant	0.0344686	0.0299074
P61804	Dolichyl-diphosphooligosaccharide--protein glycosyltransferase subunit DAD1	Dad1	0	39824000	57172000	43340000	49119000	41206000	-0.594899	-0.828792	-1.01129	0.453812	0.34856	0.328688	0.272312	4	2.40262	0.0966032	0.772834	0.519075	Not Significant	Not Significant	0.457722	0.343124
P61922	4-aminobutyrate aminotransferase, mitochondrial	Abat	473750000	384130000	292200000	665700000	526820000	573240000	-0.639548	-2.84651	-2.70975	0.0465597	0.0329333	0.0781572	0.05803	4	2.40262	0.0966032	0.0757201	0.0835566	Not Significant	Not Significant	1.48237	1.33199
P61924	Coatomer subunit zeta-1	Copz1	0	15060000	22016000	0	16933000	26974000	0.13574	0.16445	0.202391	0.877352	0.84589	0.476536	0.459136	4	2.40262	0.0966032	1.02197	0.674719	Not Significant	Not Significant	0.072686	0.056826
P61957	Small ubiquitin-related modifier 2	Sumo2	189300000	141600000	212800000	218370000	253050000	281050000	-0.481677	-2.35976	-2.14988	0.0776836	0.0722558	0.106034	0.0953262	4	2.40262	0.0966032	0.0624983	0.0752964	Not Significant	Not Significant	1.14113	1.10967
P61961	Ubiquitin-fold modifier 1	Ufm1	0	48439000	52677000	0	42352000	53181000	-0.331024	-0.323312	-0.401699	0.762656	0.700973	0.444117	0.414439	4	2.40262	0.0966032	1.57242	1.01861	Not Significant	Not Significant	0.154299	0.117671
P61963	DDB1- and CUL4-associated factor 7	Dcaf7	10224000	9373500	14335000	12720000	16955000	14099000	-0.38208	-1.7146	-1.62638	0.161568	0.151878	0.16731	0.15664	4	2.40262	0.0966032	0.0744861	0.0827857	Not Significant	Not Significant	0.818505	0.791644
P61965	WD repeat-containing protein 5	Wdr5	0	10269000	9197800	0	9567400	8446400	-0.219846	-0.884607	-0.877602	0.426339	0.411877	0.316317	0.302842	4	2.40262	0.0966032	0.0926463	0.0941311	Not Significant	Not Significant	0.385232	0.370245
P61967	AP-1 complex subunit sigma-1A	Ap1s1	0	13027000	16579000	13510000	14168000	13553000	-0.304763	-0.734866	-0.840048	0.503179	0.431128	0.347211	0.312587	4	2.40262	0.0966032	0.257988	0.197427	Not Significant	Not Significant	0.365394	0.298278
P61971	Nuclear transport factor 2	Nutf2	0	50176000	0	0	59792000	61486000	-0.971324	-0.782621	-0.977945	0.477588	0.363594	0.337649	0.279652	4	2.40262	0.0966032	2.31055	1.47976	Not Significant	Not Significant	0.439383	0.320946
P61979	Heterogeneous nuclear ribonucleoprotein K	Hnrnpk	2033200000	1380900000	1514400000	2451200000	1932100000	1668800000	-0.298121	-1.2776	-1.23592	0.270501	0.259904	0.236855	0.224499	4	2.40262	0.0966032	0.0816739	0.0872762	Not Significant	Not Significant	0.585187	0.567831
P61982	14-3-3 protein gamma;14-3-3 protein gamma, N-terminally processed	Ywhag	1105400000	715620000	666190000	881100000	409320000	415860000	0.60433	1.40395	1.61558	0.233009	0.1542	0.215147	0.157826	4	2.40262	0.0966032	0.27793	0.209886	Not Significant	Not Significant	0.811915	0.632627
P62071	Ras-related protein R-Ras2	Rras2	39116000	72678000	61612000	39458000	47564000	50823000	0.292273	1.01234	1.0585	0.368635	0.328117	0.291256	0.26135	4	2.40262	0.0966032	0.12503	0.114363	Not Significant	Not Significant	0.483971	0.433404
P62075	Mitochondrial import inner membrane translocase subunit Tim13	Timm13	0	24592000	29420000	0	20914000	28110000	-0.346018	-0.361258	-0.447711	0.736179	0.669114	0.435662	0.403197	4	2.40262	0.0966032	1.37611	0.895967	Not Significant	Not Significant	0.1745	0.133017
P62082	40S ribosomal protein S7	Rps7	384410000	175020000	179560000	362510000	163000000	135610000	0.197425	0.344592	0.412346	0.747757	0.693539	0.439663	0.41132	4	2.40262	0.0966032	0.492364	0.343853	Not Significant	Not Significant	0.158929	0.12624
P62141	Serine/threonine-protein phosphatase PP1-beta catalytic subunit	Ppp1cb	51934000	33656000	0	67007000	54143000	49205000	-1.25349	-1.46821	-1.81013	0.215962	0.117152	0.204176	0.131126	4	2.40262	0.0966032	1.09333	0.719305	Not Significant	Not Significant	0.931251	0.665622
P62192	26S protease regulatory subunit 4	Psmc1	216910000	142100000	183430000	237920000	203640000	187390000	-0.22777	-1.11591	-1.01664	0.326972	0.346193	0.269345	0.271203	4	2.40262	0.0966032	0.0624918	0.0752923	Not Significant	Not Significant	0.460681	0.48549
P62196	26S protease regulatory subunit 8	Psmc5	243970000	213040000	266870000	251290000	292010000	257790000	-0.149201	-1.2887	-0.82709	0.266986	0.437919	0.234633	0.315953	4	2.40262	0.0966032	0.0201062	0.0488121	Not Significant	Not Significant	0.358606	0.573511
P62242	40S ribosomal protein S8	Rps8	227370000	204680000	213730000	300420000	252570000	222720000	-0.254898	-1.92122	-1.3593	0.127093	0.219981	0.143031	0.199953	4	2.40262	0.0966032	0.026404	0.0527466	Not Significant	Not Significant	0.657615	0.895879
P62245	40S ribosomal protein S15a	Rps15a	131160000	152090000	116120000	140530000	125090000	123890000	0.0296551	0.233834	0.16032	0.826594	0.877568	0.464258	0.467456	4	2.40262	0.0966032	0.0241254	0.0513231	Not Significant	Not Significant	0.056719	0.0827076
P62254	Ubiquitin-conjugating enzyme E2 G1;Ubiquitin-conjugating enzyme E2 G1, N-terminally processed	Ube2g1	9745300	10053000	8962800	8466800	0	0	0.237756	0.779174	0.828579	0.479401	0.437135	0.338276	0.315668	4	2.40262	0.0966032	0.139664	0.123505	Not Significant	Not Significant	0.359385	0.319301
P62259	14-3-3 protein epsilon	Ywhae	2504900000	2144000000	2681700000	3260600000	3299100000	4044800000	-0.531691	-3.82563	-2.79317	0.0186879	0.029368	0.0536917	0.0539346	4	2.40262	0.0966032	0.0289737	0.054352	Not Significant	Not Significant	1.53213	1.72844
P62264	40S ribosomal protein S14	Rps14	82991000	79365000	117910000	97919000	88641000	54395000	0.239345	0.75203	0.809368	0.493865	0.447332	0.344295	0.320416	4	2.40262	0.0966032	0.151939	0.131174	Not Significant	Not Significant	0.349371	0.306392
P62267	40S ribosomal protein S23	Rps23	54233000	9126000	45098000	88740000	30739000	23078000	-0.498628	-0.494788	-0.614399	0.646694	0.560139	0.405639	0.362547	4	2.40262	0.0966032	1.52337	0.987969	Not Significant	Not Significant	0.251704	0.189301
P62270	40S ribosomal protein S18	Rps18	222290000	209430000	254490000	226000000	234680000	220260000	0.00676498	0.0774793	0.0397733	0.941963	0.969485	0.494842	0.491908	4	2.40262	0.0966032	0.0114355	0.0433951	Not Significant	Not Significant	0.0134588	0.0259661
P62281	40S ribosomal protein S11	Rps11	120290000	97957000	166930000	129980000	111260000	109110000	0.105991	0.445787	0.434578	0.678816	0.678136	0.416255	0.40621	4	2.40262	0.0966032	0.0847954	0.0892263	Not Significant	Not Significant	0.168683	0.168248
P62301	40S ribosomal protein S13	Rps13	270060000	153950000	274670000	265130000	190380000	169610000	0.138546	0.412852	0.450635	0.700886	0.667114	0.424873	0.402592	4	2.40262	0.0966032	0.168924	0.141785	Not Significant	Not Significant	0.1758	0.154353
P62307	Small nuclear ribonucleoprotein F	Snrpf	60653000	55532000	57272000	58625000	59493000	59713000	-0.0368509	-0.965804	-0.232708	0.388834	0.82325	0.300145	0.451775	4	2.40262	0.0966032	0.00218378	0.0376152	Not Significant	Not Significant	0.0844683	0.410235
P62309	Small nuclear ribonucleoprotein G	Snrpg	59618000	52174000	25167000	52637000	66797000	0	0.503279	0.477971	0.594433	0.657619	0.572616	0.409988	0.367961	4	2.40262	0.0966032	1.66305	1.07523	Not Significant	Not Significant	0.242136	0.182025
P62311	U6 snRNA-associated Sm-like protein LSm3	Lsm3	0	25836000	32149000	0	25695000	26653000	-0.193135	-0.287633	-0.349231	0.787914	0.738117	0.451798	0.42802	4	2.40262	0.0966032	0.676292	0.45876	Not Significant	Not Significant	0.131875	0.103521
P62313	U6 snRNA-associated Sm-like protein LSm6	Lsm6	12427000	0	0	16199000	0	0	0.179541	0.338469	0.401509	0.75203	0.701106	0.440815	0.414439	4	2.40262	0.0966032	0.422065	0.299934	Not Significant	Not Significant	0.154216	0.123765
P62315	Small nuclear ribonucleoprotein Sm D1	Snrpd1	89573000	32894000	71182000	174450000	56931000	48672000	-0.401549	-0.552972	-0.675273	0.60973	0.52313	0.392196	0.348925	4	2.40262	0.0966032	0.790973	0.530407	Not Significant	Not Significant	0.281391	0.214862
P62317	Small nuclear ribonucleoprotein Sm D2	Snrpd2	71426000	33970000	58928000	79804000	48949000	50941000	-0.158968	-0.404639	-0.457774	0.706446	0.662241	0.42667	0.4013	4	2.40262	0.0966032	0.231512	0.180887	Not Significant	Not Significant	0.178984	0.150921
P62320	Small nuclear ribonucleoprotein Sm D3	Snrpd3	88855000	64251000	0	98339000	110500000	100660000	-1.53556	-1.39896	-1.74218	0.234388	0.128994	0.216036	0.140479	4	2.40262	0.0966032	1.80722	1.1653	Not Significant	Not Significant	0.889431	0.630065
P62331	ADP-ribosylation factor 6	Arf6	23232000	27672000	19470000	21442000	24718000	20007000	0.0797623	0.46441	0.386468	0.666505	0.71167	0.412709	0.417477	4	2.40262	0.0966032	0.044247	0.0638939	Not Significant	Not Significant	0.147722	0.176196
P62334	26S protease regulatory subunit 10B	Psmc6	287960000	208990000	234620000	307070000	310630000	282310000	-0.310472	-2.18612	-1.61915	0.0940986	0.153429	0.119414	0.157635	4	2.40262	0.0966032	0.0302544	0.0551521	Not Significant	Not Significant	0.814093	1.02642
P62342	Selenoprotein T	Selenot	0	8882400	0	0	13504000	10666000	-1.24256	-2.90997	-3.34393	0.0436795	0.0140979	0.07572	0.0352693	4	2.40262	0.0966032	0.273495	0.207115	Not Significant	Not Significant	1.85085	1.35972
P62500	TSC22 domain family protein 1	Tsc22d1	56738000	62622000	92766000	96172000	138750000	168030000	-0.922033	-2.87702	-3.10229	0.0451483	0.0193537	0.0769141	0.0416853	4	2.40262	0.0966032	0.154063	0.132501	Not Significant	Not Significant	1.71324	1.34536
P62627	Dynein light chain roadblock-type 1	Dynlrb1	0	13751000	0	0	14093000	15032000	-0.890164	-1.3697	-1.65861	0.242637	0.145147	0.221618	0.152467	4	2.40262	0.0966032	0.633551	0.432058	Not Significant	Not Significant	0.838193	0.615042
P62631	Elongation factor 1-alpha 2	Eef1a2	190680000	0	0	355590000	123280000	163320000	-2.65462	-1.89053	-2.36871	0.131671	0.0530005	0.14637	0.0780106	4	2.40262	0.0966032	2.95754	1.88396	Not Significant	Not Significant	1.27572	0.880511
P62702	40S ribosomal protein S4, X isoform	Rps4x	308130000	245840000	309140000	323060000	249850000	230700000	0.110212	0.6026	0.51917	0.57927	0.621096	0.380361	0.388607	4	2.40262	0.0966032	0.0501756	0.0675978	Not Significant	Not Significant	0.206841	0.237119
P62717	60S ribosomal protein L18a	Rpl18a	43879000	52966000	82552000	74910000	64217000	46379000	-0.0725616	-0.214326	-0.234465	0.840776	0.821943	0.467009	0.451426	4	2.40262	0.0966032	0.171932	0.143664	Not Significant	Not Significant	0.0851581	0.0753199
P62737	Actin, aortic smooth muscle;Actin, gamma-enteric smooth muscle	Acta2	18725000	391110000	28154000	178640000	104050000	167750000	-1.30621	-0.935764	-1.17232	0.402372	0.282835	0.305995	0.236838	4	2.40262	0.0966032	2.92269	1.86218	Not Significant	Not Significant	0.548467	0.395372
P62748	Hippocalcin-like protein 1;Neuron-specific calcium-binding protein hippocalcin	Hpcal1	94222000	124700000	103310000	44481000	55953000	63377000	0.981332	5.13418	4.52697	0.00681872	0.00339094	0.0373508	0.0183495	4	2.40262	0.0966032	0.0548001	0.070487	Not Significant	Not Significant	2.46968	2.1663
P62751	60S ribosomal protein L23a	Rpl23a	144190000	116420000	118670000	187890000	137970000	121320000	-0.219598	-1.03766	-0.961639	0.358036	0.371129	0.28627	0.282541	4	2.40262	0.0966032	0.0671801	0.0782213	Not Significant	Not Significant	0.430475	0.446073
P62754	40S ribosomal protein S6	Rps6	101530000	67610000	61593000	113380000	72522000	53614000	-0.0200952	-0.0523224	-0.0589201	0.960781	0.954812	0.498362	0.488722	4	2.40262	0.0966032	0.221258	0.174481	Not Significant	Not Significant	0.0200821	0.0173758
P62774	Myotrophin	Mtpn	256610000	162930000	58615000	241210000	139980000	220620000	-0.534634	-0.791802	-0.961791	0.472785	0.371058	0.33577	0.282541	4	2.40262	0.0966032	0.683867	0.463493	Not Significant	Not Significant	0.430558	0.325337
P62806	Histone H4	Hist1h4a	2209000000	1490500000	1848000000	3085200000	1491100000	1424300000	-0.0356132	-0.0897707	-0.101756	0.932785	0.922063	0.491566	0.480701	4	2.40262	0.0966032	0.236072	0.183735	Not Significant	Not Significant	0.0352394	0.0302185
P62814	V-type proton ATPase subunit B, brain isoform	Atp6v1b2	348720000	295000000	343380000	167140000	182100000	145490000	0.998627	8.20018	5.46158	0.00120499	0.00126996	0.0225059	0.012364	4	2.40262	0.0966032	0.022246	0.0501489	Not Significant	Not Significant	2.89621	2.91902
P62821	Ras-related protein Rab-1A	Rab1A	345630000	435190000	527620000	314850000	386820000	430270000	0.199601	0.905333	0.854723	0.41649	0.423528	0.312252	0.308646	4	2.40262	0.0966032	0.0729124	0.0818025	Not Significant	Not Significant	0.373118	0.380396
P62827	GTP-binding nuclear protein Ran;GTP-binding nuclear protein Ran, testis-specific isoform	Ran	582210000	567580000	567220000	858790000	908290000	962880000	-0.667514	-13.5578	-4.16532	0.00017132	0.00512565	0.0170097	0.0215161	4	2.40262	0.0966032	0.0036361	0.0385225	Not Significant	Not Significant	2.29025	3.76619
P62830	60S ribosomal protein L23	Rpl23	119670000	115100000	180240000	153150000	136790000	128820000	-0.040132	-0.182831	-0.172273	0.863824	0.868541	0.473675	0.464946	4	2.40262	0.0966032	0.072273	0.0814031	Not Significant	Not Significant	0.0612098	0.0635749
P62835	Ras-related protein Rap-1A	Rap1a	0	24395000	19352000	16574000	20135000	20660000	-0.333387	-0.614437	-0.730834	0.572155	0.490751	0.377571	0.336066	4	2.40262	0.0966032	0.441603	0.31214	Not Significant	Not Significant	0.309139	0.242486
P62843	40S ribosomal protein S15	Rps15	51352000	0	0	75462000	0	0	0.238695	0.154013	0.193302	0.885058	0.85271	0.477825	0.460745	4	2.40262	0.0966032	3.60302	2.28722	Not Significant	Not Significant	0.0691985	0.0530284
P62849	40S ribosomal protein S24	Rps24	58144000	38900000	24282000	88536000	45891000	41203000	-0.535979	-1.06886	-1.25891	0.345347	0.252016	0.279821	0.219682	4	2.40262	0.0966032	0.377179	0.271891	Not Significant	Not Significant	0.598572	0.461745
P62852	40S ribosomal protein S25	Rps25	139780000	118800000	202910000	129500000	103540000	94639000	0.469629	1.7706	1.79938	0.151333	0.118952	0.159935	0.132398	4	2.40262	0.0966032	0.105525	0.102177	Not Significant	Not Significant	0.924628	0.820067
P62855	40S ribosomal protein S26	Rps26	46693000	67426000	52501000	79742000	81944000	62774000	-0.437096	-2.20328	-1.97956	0.092314	0.0920709	0.118061	0.110125	4	2.40262	0.0966032	0.0590343	0.0731322	Not Significant	Not Significant	1.03588	1.03473
P62858	40S ribosomal protein S28	Rps28	0	88057000	0	0	103330000	0	-0.0946098	-0.0625343	-0.0784563	0.953137	0.93986	0.496681	0.485527	4	2.40262	0.0966032	3.43342	2.18126	Not Significant	Not Significant	0.0269368	0.0208445
P62869	Transcription elongation factor B polypeptide 2	Elob	168970000	109540000	122320000	143070000	185370000	182230000	-0.364668	-1.63476	-1.55136	0.177438	0.168708	0.179006	0.167478	4	2.40262	0.0966032	0.0746409	0.0828824	Not Significant	Not Significant	0.772864	0.750954
P62874	Guanine nucleotide-binding protein G(I)/G(S)/G(T) subunit beta-1	Gnb1	191580000	239670000	140980000	155210000	160310000	177080000	0.185	0.807324	0.775063	0.464749	0.465956	0.332898	0.326135	4	2.40262	0.0966032	0.0787658	0.0854594	Not Significant	Not Significant	0.331655	0.332782
P62878	E3 ubiquitin-protein ligase RBX1;E3 ubiquitin-protein ligase RBX1, N-terminally processed	Rbx1	30069000	25701000	42828000	32039000	38902000	26260000	0.00537178	0.0197126	0.0202227	0.985217	0.984481	0.504392	0.495808	4	2.40262	0.0966032	0.111388	0.10584	Not Significant	Not Significant	0.00679251	0.00646823
P62880	Guanine nucleotide-binding protein G(I)/G(S)/G(T) subunit beta-2	Gnb2	414250000	487690000	468330000	328130000	312760000	389910000	0.413842	3.45602	2.27381	0.0259118	0.060606	0.0606092	0.0854686	4	2.40262	0.0966032	0.0215085	0.0496882	Not Significant	Not Significant	1.21748	1.5865
P62889	60S ribosomal protein L30	Rpl30	81029000	90653000	76257000	100490000	91094000	91462000	-0.193282	-2.23462	-1.13811	0.0891526	0.295862	0.116021	0.24383	4	2.40262	0.0966032	0.0112219	0.0432617	Not Significant	Not Significant	0.52891	1.04987
P62897	Cytochrome c, somatic	Cycs	84942000	72680000	106660000	83357000	82113000	137230000	-0.170818	-0.585629	-0.614311	0.589573	0.560193	0.384404	0.362547	4	2.40262	0.0966032	0.127618	0.11598	Not Significant	Not Significant	0.251662	0.229462
P62900	60S ribosomal protein L31	Rpl31	142830000	110420000	197010000	183940000	135390000	131800000	-0.0263791	-0.0920258	-0.0960028	0.931102	0.926453	0.491392	0.482212	4	2.40262	0.0966032	0.123252	0.113252	Not Significant	Not Significant	0.0331764	0.0310027
P62908	40S ribosomal protein S3	Rps3	332600000	380810000	337360000	329260000	362000000	331940000	0.037003	0.487776	0.222079	0.651237	0.831168	0.4074	0.454273	4	2.40262	0.0966032	0.00863227	0.0416438	Not Significant	Not Significant	0.0803111	0.186261
P62911	60S ribosomal protein L32	Rpl32	32343000	22926000	25753000	52902000	34656000	33372000	-0.559962	-2.16889	-2.18279	0.0959287	0.0689556	0.120265	0.0928629	4	2.40262	0.0966032	0.0999843	0.0987156	Not Significant	Not Significant	1.16143	1.01805
P62918	60S ribosomal protein L8	Rpl8	101750000	64406000	112670000	127600000	75669000	88613000	-0.0708646	-0.212338	-0.231442	0.842225	0.824192	0.467288	0.451931	4	2.40262	0.0966032	0.167068	0.140626	Not Significant	Not Significant	0.0839716	0.074572
P62960	Nuclease-sensitive element-binding protein 1	Ybx1	55277000	26981000	36648000	67309000	41040000	43433000	-0.378088	-1.00788	-1.12933	0.370531	0.299285	0.292062	0.245704	4	2.40262	0.0966032	0.211085	0.168125	Not Significant	Not Significant	0.523915	0.431176
P62965	Cellular retinoic acid-binding protein 1	Crabp1	26286000	32888000	29615000	35970000	42745000	56908000	-0.590999	-2.75647	-2.5699	0.0510341	0.039976	0.0824897	0.0662306	4	2.40262	0.0966032	0.0689538	0.0793294	Not Significant	Not Significant	1.3982	1.29214
P62983	Ubiquitin-40S ribosomal protein S27a;Ubiquitin;40S ribosomal protein S27a;Ubiquitin-60S ribosomal protein L40;Ubiquitin;60S ribosomal protein L40;Polyubiquitin-B;Ubiquitin;Polyubiquitin-C;Ubiquitin;Ubiquitin-related 1;Ubiquitin-related 2	Rps27a	1276100000	1355800000	967690000	1641100000	1933400000	1324300000	-0.44251	-2.03235	-1.90806	0.111913	0.101932	0.132124	0.119114	4	2.40262	0.0966032	0.0711114	0.0806773	Not Significant	Not Significant	0.99169	0.951121
P62996	Transformer-2 protein homolog beta	Tra2b	118350000	127500000	57622000	150910000	167200000	173460000	-0.777206	-2.09908	-2.34533	0.103761	0.0547775	0.125845	0.0802606	4	2.40262	0.0966032	0.205639	0.164723	Not Significant	Not Significant	1.2614	0.983965
P63001	Ras-related C3 botulinum toxin substrate 1;Ras-related C3 botulinum toxin substrate 3	Rac1	137800000	151630000	201790000	94180000	86423000	109230000	0.748546	3.88823	3.44103	0.0177171	0.0124422	0.0527467	0.0331819	4	2.40262	0.0966032	0.0555934	0.0709825	Not Significant	Not Significant	1.9051	1.75161
P63005	Platelet-activating factor acetylhydrolase IB subunit alpha	Pafah1b1	168820000	173430000	122230000	197960000	232690000	218520000	-0.497315	-2.82897	-2.38516	0.0473944	0.0517863	0.0791082	0.0767828	4	2.40262	0.0966032	0.046355	0.0652109	Not Significant	Not Significant	1.28579	1.32427
P63011	Ras-related protein Rab-3A	Rab3a	0	9790700	6761700	0	10987000	8697300	-0.287684	-1.47157	-1.31249	0.215108	0.234441	0.203516	0.208815	4	2.40262	0.0966032	0.0573274	0.0720659	Not Significant	Not Significant	0.629967	0.667343
P63017	Heat shock cognate 71 kDa protein	Hspa8	2141000000	2414000000	1780900000	2122600000	2126700000	2234100000	-0.0439419	-0.338326	-0.235872	0.75213	0.820897	0.440815	0.451426	4	2.40262	0.0966032	0.0253033	0.052059	Not Significant	Not Significant	0.0857112	0.123707
P63024	Vesicle-associated membrane protein 3;Vesicle-associated membrane protein 2	Vamp3	88698000	84871000	92157000	97575000	152780000	125550000	-0.477273	-2.50749	-2.20617	0.0662343	0.0667043	0.0953979	0.0910218	4	2.40262	0.0966032	0.0543432	0.0702015	Not Significant	Not Significant	1.17585	1.17892
P63028	Translationally-controlled tumor protein	Tpt1	353120000	284230000	333400000	302100000	257390000	280560000	0.205727	1.78859	1.14235	0.148194	0.294221	0.157687	0.243301	4	2.40262	0.0966032	0.019845	0.0486489	Not Significant	Not Significant	0.531326	0.82917
P63034	Cytohesin-2	Cyth2	6297300	0	0	6048900	0	0	-0.0663572	-0.184646	-0.204926	0.86249	0.843991	0.473259	0.458721	4	2.40262	0.0966032	0.193726	0.15728	Not Significant	Not Significant	0.0736623	0.0642458
P63037	DnaJ homolog subfamily A member 1	Dnaja1	217760000	140480000	196340000	278840000	267310000	225400000	-0.49466	-2.32619	-2.16057	0.0805883	0.071167	0.108467	0.0943519	4	2.40262	0.0966032	0.0678292	0.0786268	Not Significant	Not Significant	1.14772	1.09373
P63038	60 kDa heat shock protein, mitochondrial	Hspd1	2809700000	2325200000	3521800000	1291700000	1291900000	1244600000	1.15655	6.64485	5.57132	0.00266272	0.0011402	0.02801	0.0116418	4	2.40262	0.0966032	0.0454408	0.0646398	Not Significant	Not Significant	2.94302	2.57467
P63073	Eukaryotic translation initiation factor 4E	Eif4e	175340000	85470000	94607000	226330000	145220000	120280000	-0.493134	-1.16883	-1.34029	0.307376	0.225754	0.258119	0.203584	4	2.40262	0.0966032	0.267002	0.203059	Not Significant	Not Significant	0.646364	0.51233
P63082	V-type proton ATPase 16 kDa proteolipid subunit	Atp6v0c	0	19482000	0	0	5726800	0	0.0316964	0.0381602	0.0469801	0.971388	0.963961	0.501374	0.490827	4	2.40262	0.0966032	1.03488	0.682786	Not Significant	Not Significant	0.0159408	0.012607
P63085	Mitogen-activated protein kinase 1	Mapk1	176560000	220440000	176240000	142300000	140520000	138840000	0.434984	4.03995	2.45437	0.0156046	0.0469842	0.0507813	0.0725932	4	2.40262	0.0966032	0.0173894	0.0471148	Not Significant	Not Significant	1.32805	1.80675
P63087	Serine/threonine-protein phosphatase PP1-gamma catalytic subunit	Ppp1cc	577180000	369340000	443710000	806010000	716710000	692870000	-0.693728	-3.49909	-3.14281	0.0249167	0.0183416	0.059953	0.0404951	4	2.40262	0.0966032	0.0589602	0.073086	Not Significant	Not Significant	1.73656	1.60351
P63101	14-3-3 protein zeta/delta	Ywhaz	2822500000	2322400000	2211900000	3714800000	2856800000	4348700000	-0.556798	-2.69126	-2.46775	0.0545867	0.0461106	0.0851114	0.0721807	4	2.40262	0.0966032	0.0642058	0.0763631	Not Significant	Not Significant	1.3362	1.26291
P63154	Crooked neck-like protein 1	Crnkl1	0	17524000	14623000	0	22365000	18537000	-0.282706	-0.453215	-0.546854	0.673891	0.603004	0.414627	0.381421	4	2.40262	0.0966032	0.583649	0.400882	Not Significant	Not Significant	0.21968	0.17141
P63158	High mobility group protein B1	Hmgb1	491160000	378090000	335640000	359590000	274550000	321890000	0.323949	1.63869	1.46973	0.17662	0.188989	0.178566	0.181878	4	2.40262	0.0966032	0.0586207	0.0728739	Not Significant	Not Significant	0.723564	0.752959
P63166	Small ubiquitin-related modifier 1	Sumo1	34597000	37310000	42939000	37839000	45746000	52582000	-0.23853	-1.44462	-1.17516	0.22207	0.281776	0.208066	0.236319	4	2.40262	0.0966032	0.0408948	0.0617997	Not Significant	Not Significant	0.550095	0.653511
P63168	Dynein light chain 1, cytoplasmic	Dynll1	95544000	0	0	7038800	0	0	1.88828	1.94129	2.40734	0.124194	0.0501943	0.140661	0.075297	4	2.40262	0.0966032	1.4192	0.92289	Not Significant	Not Significant	1.29935	0.905901
P63213	Guanine nucleotide-binding protein G(I)/G(S)/G(O) subunit gamma-2	Gng2	10956000	17486000	38730000	0	0	6510800	1.29967	2.35421	2.80573	0.0781552	0.0288675	0.106324	0.0531968	4	2.40262	0.0966032	0.457162	0.32186	Not Significant	Not Significant	1.53959	1.10704
P63242	Eukaryotic translation initiation factor 5A-1	Eif5a	731070000	548830000	562010000	741480000	724030000	633690000	-0.197757	-1.31717	-1.01115	0.258168	0.34862	0.229222	0.272312	4	2.40262	0.0966032	0.033812	0.0573747	Not Significant	Not Significant	0.457648	0.588097
P63260	Actin, cytoplasmic 2;Actin, cytoplasmic 2, N-terminally processed	Actg1	11746000000	15877000000	11183000000	11749000000	8871700000	11375000000	0.271576	1.33517	1.21435	0.252739	0.267495	0.226349	0.228393	4	2.40262	0.0966032	0.0620584	0.0750215	Not Significant	Not Significant	0.572684	0.597327
P63276	40S ribosomal protein S17	Rps17	51628000	51796000	50397000	49298000	53536000	50117000	0.00899791	0.23415	0.0568058	0.826365	0.956432	0.464258	0.488722	4	2.40262	0.0966032	0.00221506	0.0376347	Not Significant	Not Significant	0.0193461	0.0828282
P63280	SUMO-conjugating enzyme UBC9	Ube2i	164630000	116910000	131090000	204600000	195970000	168140000	-0.47264	-2.80232	-2.30793	0.0486962	0.0577501	0.0800271	0.0828877	4	2.40262	0.0966032	0.0426693	0.0629083	Not Significant	Not Significant	1.23845	1.3125
P63321	Ras-related protein Ral-A	Rala	0	0	17131000	0	0	14153000	0.496275	0.716222	0.871706	0.513444	0.414857	0.352051	0.304479	4	2.40262	0.0966032	0.720179	0.486179	Not Significant	Not Significant	0.382101	0.289507
P63323	40S ribosomal protein S12	Rps12	126380000	143200000	230590000	119520000	174530000	142830000	0.162034	0.526388	0.561197	0.626456	0.593748	0.397801	0.377566	4	2.40262	0.0966032	0.142133	0.125048	Not Significant	Not Significant	0.226398	0.20311
P63325	40S ribosomal protein S10	Rps10	210120000	151870000	253110000	236130000	199200000	156580000	0.044372	0.161033	0.165824	0.879873	0.873409	0.477221	0.466556	4	2.40262	0.0966032	0.113889	0.107402	Not Significant	Not Significant	0.0587825	0.0555798
P63328	Serine/threonine-protein phosphatase 2B catalytic subunit alpha isoform;Serine/threonine-protein phosphatase 2B catalytic subunit beta isoform	Ppp3ca	12919000	0	0	11133000	0	0	-0.213947	-0.398381	-0.473279	0.710698	0.651722	0.428097	0.39785	4	2.40262	0.0966032	0.432621	0.306528	Not Significant	Not Significant	0.185938	0.148315
P63330	Serine/threonine-protein phosphatase 2A catalytic subunit alpha isoform	Ppp2ca	221330000	220480000	189910000	208730000	236790000	207510000	-0.0487548	-0.509791	-0.282044	0.637038	0.786807	0.401728	0.443214	4	2.40262	0.0966032	0.0137196	0.0448221	Not Significant	Not Significant	0.104132	0.195835
P67778	Prohibitin	Phb	324370000	328220000	487720000	251070000	242910000	212810000	0.66676	3.22668	2.95699	0.0320764	0.0235081	0.0667267	0.0466813	4	2.40262	0.0966032	0.0640498	0.0762656	Not Significant	Not Significant	1.62878	1.49381
P67871	Casein kinase II subunit beta	Csnk2b	100200000	81811000	74955000	143590000	141730000	127460000	-0.6926	-5.11334	-3.66927	0.00691806	0.00932796	0.0374819	0.0285515	4	2.40262	0.0966032	0.0275198	0.0534438	Not Significant	Not Significant	2.03021	2.16002
P67984	60S ribosomal protein L22	Rpl22	193460000	166260000	166230000	199430000	221050000	203610000	-0.249135	-2.90178	-1.46875	0.0440395	0.189245	0.0760034	0.181942	4	2.40262	0.0966032	0.0110569	0.0431586	Not Significant	Not Significant	0.722975	1.35616
P68033	Actin, alpha cardiac muscle 1;Actin, alpha skeletal muscle	Actc1	574870000	1618300000	1031900000	617320000	355450000	515670000	1.02825	2.09093	2.45622	0.104721	0.0468624	0.126542	0.0725427	4	2.40262	0.0966032	0.362755	0.26288	Not Significant	Not Significant	1.32918	0.979967
P68037	Ubiquitin-conjugating enzyme E2 L3	Ube2l3	466060000	271230000	375700000	499740000	448370000	426550000	-0.336323	-1.42019	-1.38223	0.228578	0.213189	0.212709	0.19632	4	2.40262	0.0966032	0.084122	0.0888057	Not Significant	Not Significant	0.671234	0.640965
P68040	Guanine nucleotide-binding protein subunit beta-2-like 1;Guanine nucleotide-binding protein subunit beta-2-like 1, N-terminally processed	Rack1	523160000	507390000	417660000	549730000	571580000	576090000	-0.235766	-2.26976	-1.34105	0.0857506	0.225521	0.11319	0.203584	4	2.40262	0.0966032	0.0161843	0.0463619	Not Significant	Not Significant	0.646814	1.06676
P68254	14-3-3 protein theta	Ywhaq	1487100000	1083100000	736080000	1577000000	1206800000	1520600000	-0.429136	-1.35256	-1.45443	0.2476	0.19303	0.22284	0.184483	4	2.40262	0.0966032	0.150996	0.130585	Not Significant	Not Significant	0.714376	0.606249
P68368	Tubulin alpha-4A chain	Tuba4a	20698000	23167000	20410000	33018000	35619000	36769000	-0.714517	-9.66279	-4.30219	0.00064173	0.00437374	0.0186422	0.020081	4	2.40262	0.0966032	0.00820185	0.0413749	Not Significant	Not Significant	2.35915	3.19265
P68369	Tubulin alpha-1A chain	Tuba1a	0	394850000	607950000	0	872090000	785140000	-0.572113	-0.194971	-0.246119	0.854919	0.813292	0.471114	0.45031	4	2.40262	0.0966032	12.9157	8.10524	Not Significant	Not Significant	0.0897534	0.0680752
P68372	Tubulin beta-4B chain	Tubb4b	5814300000	3440600000	3388300000	7028700000	6105600000	5938600000	-0.636896	-2.38618	-2.43036	0.0754805	0.0485957	0.104151	0.0740855	4	2.40262	0.0966032	0.106862	0.103012	Not Significant	Not Significant	1.3134	1.12217
P68373	Tubulin alpha-1C chain	Tuba1c	73793000	0	0	57104000	0	0	0.980443	0.640716	0.804001	0.556571	0.45021	0.371513	0.321431	4	2.40262	0.0966032	3.5124	2.23061	Not Significant	Not Significant	0.346585	0.25448
P68510	14-3-3 protein eta	Ywhah	362480000	425210000	471350000	279560000	287440000	270240000	0.580739	5.13078	3.23778	0.00683479	0.0161865	0.0373508	0.0378414	4	2.40262	0.0966032	0.019217	0.0482566	Not Significant	Not Significant	1.79085	2.16527
P69566	Ran-binding protein 9	Ranbp9	6086200	0	0	8141400	0	0	0.177468	0.367744	0.43085	0.731697	0.680707	0.434606	0.406996	4	2.40262	0.0966032	0.349334	0.254495	Not Significant	Not Significant	0.16704	0.135669
P70122	Ribosome maturation protein SBDS	Sbds	51716000	34270000	34812000	45147000	44987000	40382000	-0.136903	-0.680177	-0.615477	0.533723	0.55947	0.361549	0.362395	4	2.40262	0.0966032	0.0607678	0.0742152	Not Significant	Not Significant	0.252224	0.272684
P70168	Importin subunit beta-1	Kpnb1	756720000	449090000	478090000	809170000	623420000	573660000	-0.277599	-0.989783	-1.02527	0.37831	0.342404	0.295912	0.269768	4	2.40262	0.0966032	0.11799	0.109965	Not Significant	Not Significant	0.465461	0.422153
P70188	Kinesin-associated protein 3	Kifap3	15317000	24785000	9389000	13740000	29213000	37916000	-0.698052	-1.16956	-1.40535	0.307115	0.206536	0.258032	0.192627	4	2.40262	0.0966032	0.534346	0.370081	Not Significant	Not Significant	0.685004	0.512699
P70190	F-actin-capping protein subunit alpha-3	Capza3	8705900	0	0	19820000	18251000	10872000	-0.655907	-1.2165	-1.44589	0.290665	0.195322	0.248776	0.185686	4	2.40262	0.0966032	0.436064	0.308679	Not Significant	Not Significant	0.709248	0.536607
P70195	Proteasome subunit beta type-7	Psmb7	156690000	142330000	147820000	199290000	203910000	199420000	-0.432539	-10.3552	-2.72165	0.000490895	0.0323976	0.0186422	0.0576001	4	2.40262	0.0966032	0.00261713	0.0378859	Not Significant	Not Significant	1.48949	3.30901
P70206	Plexin-A1	Plxna1	0	5175200	4960300	0	4186600	0	0.31465	0.713677	0.824592	0.514857	0.439237	0.3524	0.316758	4	2.40262	0.0966032	0.29157	0.218408	Not Significant	Not Significant	0.357301	0.288313
P70245	3-beta-hydroxysteroid-Delta(8),Delta(7)-isomerase	Ebp	0	14265000	0	0	18637000	18046000	-0.262851	-1.20035	-1.12982	0.29623	0.299093	0.251718	0.245704	4	2.40262	0.0966032	0.0719275	0.0811872	Not Significant	Not Significant	0.524194	0.52837
P70261	Paladin	Pald1	0	8634100	8572000	0	11271000	10049000	-0.17001	-0.896627	-0.787317	0.420604	0.459242	0.313512	0.324397	4	2.40262	0.0966032	0.0539281	0.0699422	Not Significant	Not Significant	0.337958	0.376127
P70268	Serine/threonine-protein kinase N1	Pkn1	9089800	7671900	12671000	5383300	6619900	6701000	0.629205	2.66605	2.59116	0.0560361	0.0388099	0.086226	0.0650844	4	2.40262	0.0966032	0.0835486	0.0884474	Not Significant	Not Significant	1.41106	1.25153
P70281	Synaptonemal complex protein 3	Sycp3	42017000	44370000	51419000	66794000	70754000	75442000	-0.63168	-6.27125	-3.61664	0.00329977	0.00996159	0.0284036	0.0297582	4	2.40262	0.0966032	0.0152187	0.0457587	Not Significant	Not Significant	2.00167	2.48152
P70295	Ancient ubiquitous protein 1	Aup1	0	0	8394500	0	6309700	7480200	0.134427	0.5229	0.525423	0.628671	0.616984	0.398604	0.386978	4	2.40262	0.0966032	0.0991345	0.0981846	Not Significant	Not Significant	0.209726	0.201577
P70296	Phosphatidylethanolamine-binding protein 1;Hippocampal cholinergic neurostimulating peptide	Pebp1	3912000000	2509900000	2396100000	5603000000	4986200000	5300800000	-0.884709	-3.83671	-3.69315	0.0185115	0.00905512	0.0536629	0.0280887	4	2.40262	0.0966032	0.0797578	0.0860791	Not Significant	Not Significant	2.04311	1.73256
P70302	Stromal interaction molecule 1	Stim1	96431000	103830000	147340000	94212000	104380000	81821000	0.291523	1.36004	1.26783	0.245422	0.249012	0.222336	0.21824	4	2.40262	0.0966032	0.0689183	0.0793072	Not Significant	Not Significant	0.60378	0.610086
P70318	Nucleolysin TIAR	Tial1	29764000	24651000	30183000	29687000	31153000	26300000	-0.0451048	-0.379156	-0.248262	0.72384	0.811704	0.43222	0.45031	4	2.40262	0.0966032	0.0212276	0.0495127	Not Significant	Not Significant	0.0906022	0.140357
P70333	Heterogeneous nuclear ribonucleoprotein H2	Hnrnph2	16698000	35510000	49333000	0	0	22026000	1.20142	1.75325	2.13208	0.154429	0.0741077	0.162476	0.0964202	4	2.40262	0.0966032	0.704361	0.476296	Not Significant	Not Significant	1.13014	0.811271
P70336	Rho-associated protein kinase 2	Rock2	26619000	27012000	29715000	13244000	13051000	15755000	0.990646	9.86401	5.67535	0.000592586	0.00103088	0.0186422	0.0111424	4	2.40262	0.0966032	0.0151294	0.0457029	Not Significant	Not Significant	2.98679	3.22725
P70349	Histidine triad nucleotide-binding protein 1	Hint1	473060000	408580000	640410000	537330000	669230000	685040000	-0.330954	-1.4966	-1.41482	0.208837	0.203865	0.199188	0.19122	4	2.40262	0.0966032	0.0733521	0.0820772	Not Significant	Not Significant	0.690656	0.680193
P70362	Ubiquitin fusion degradation protein 1 homolog	Ufd1	83570000	63143000	99022000	88031000	104970000	80475000	-0.1697	-0.770579	-0.727139	0.483946	0.492862	0.340459	0.337084	4	2.40262	0.0966032	0.072748	0.0816998	Not Significant	Not Significant	0.307274	0.315203
P70372	ELAV-like protein 1	Elavl1	151290000	168340000	210890000	200060000	234340000	229390000	-0.333884	-2.10931	-1.67317	0.10257	0.142199	0.125322	0.150481	4	2.40262	0.0966032	0.0375839	0.0597312	Not Significant	Not Significant	0.847104	0.98898
P70385	Testosterone 17-beta-dehydrogenase 3	Hsd17b3	5968300	0	9263900	140220000	101530000	47657000	-3.69678	-7.19029	-8.49646	0.00198217	0.000102218	0.0246779	0.00367107	4	2.40262	0.0966032	0.396502	0.283964	Significant	Significant	3.99047	2.70286
P70388	DNA repair protein RAD50	Rad50	3110000	0	0	1641200	0	0	-0.0337065	-0.0297723	-0.0371111	0.977675	0.971527	0.502252	0.49223	4	2.40262	0.0966032	1.92263	1.2374	Not Significant	Not Significant	0.0125453	0.00980552
P70389	Insulin-like growth factor-binding protein complex acid labile subunit	Igfals	6445700	44270000	12444000	0	0	7088400	1.37343	1.65966	2.04284	0.172322	0.0841393	0.175351	0.104842	4	2.40262	0.0966032	1.02723	0.678005	Not Significant	Not Significant	1.075	0.76366
P70398	Probable ubiquitin carboxyl-terminal hydrolase FAF-X	Usp9x	178530000	208590000	188470000	200220000	240270000	201540000	-0.155379	-1.43332	-0.875337	0.225058	0.41302	0.210267	0.303544	4	2.40262	0.0966032	0.0176275	0.0472636	Not Significant	Not Significant	0.384029	0.647706
P70404	Isocitrate dehydrogenase [NAD] subunit gamma 1, mitochondrial	Idh3g	45899000	67972000	48533000	38886000	42301000	44918000	0.345044	1.84569	1.60875	0.138681	0.155684	0.1518	0.158842	4	2.40262	0.0966032	0.0524232	0.069002	Not Significant	Not Significant	0.807755	0.857984
P70419	Polypeptide N-acetylgalactosaminyltransferase 3	Galnt3	11902000	8009600	8510000	16273000	22398000	13826000	-0.878332	-3.24289	-3.31984	0.0315874	0.0145449	0.0664146	0.0358328	4	2.40262	0.0966032	0.110038	0.104997	Not Significant	Not Significant	1.83729	1.50049
P70429	Ena/VASP-like protein	Evl	6918800	0	0	2089000	0	0	0.234132	0.334835	0.407798	0.754572	0.69671	0.441488	0.41281	4	2.40262	0.0966032	0.733418	0.49445	Not Significant	Not Significant	0.156948	0.122299
P70441	Na(+)/H(+) exchange regulatory cofactor NHE-RF1	Slc9a3r1	50989000	83309000	104660000	25488000	30998000	31069000	1.39294	4.34768	4.68773	0.0121792	0.0028394	0.0462245	0.0171278	4	2.40262	0.0966032	0.153972	0.132444	Not Significant	Not Significant	2.54677	1.91438
P70452	Syntaxin-4	Stx4	5679500	0	0	2727200	0	0	0.325042	0.511101	0.617761	0.636199	0.558054	0.40137	0.361913	4	2.40262	0.0966032	0.606678	0.415269	Not Significant	Not Significant	0.253324	0.196407
P70458	Plasma serine protease inhibitor	Serpina5	103050000	74665000	114070000	115460000	86487000	59309000	0.189166	0.56679	0.617791	0.601149	0.558035	0.389157	0.361913	4	2.40262	0.0966032	0.167082	0.140635	Not Significant	Not Significant	0.253338	0.221018
Q60817	Nascent polypeptide-associated complex subunit alpha;Nascent polypeptide-associated complex subunit alpha, muscle-specific form	Naca	105360000	108600000	103270000	153780000	156890000	143240000	-0.516094	-11.4471	-3.2359	0.000332341	0.0162265	0.0186422	0.0378414	4	2.40262	0.0966032	0.00304898	0.0381557	Not Significant	Not Significant	1.78978	3.47842
P70694	Estradiol 17 beta-dehydrogenase 5;Aldo-keto reductase family 1 member C21;Aldo-keto reductase family 1 member C18	Akr1c6	65973000	87691000	100750000	83236000	107190000	135030000	-0.349167	-1.29277	-1.32217	0.265707	0.231385	0.233634	0.207288	4	2.40262	0.0966032	0.109424	0.104613	Not Significant	Not Significant	0.635665	0.575597
P70696	Histone H2B type 1-A	Hist1h2ba	4692500000	2864600000	4699000000	6520600000	2778700000	1980300000	0.27197	0.482208	0.576054	0.654857	0.584247	0.408731	0.373061	4	2.40262	0.0966032	0.477161	0.334355	Not Significant	Not Significant	0.233403	0.183854
P70697	Uroporphyrinogen decarboxylase	Urod	0	24081000	20966000	0	19165000	19974000	-0.117183	-0.275508	-0.316377	0.796572	0.761779	0.45525	0.436	4	2.40262	0.0966032	0.271361	0.205782	Not Significant	Not Significant	0.118171	0.0987747
P70698	CTP synthase 1	Ctps1	79022000	87267000	76919000	77419000	101350000	86371000	-0.117826	-0.937492	-0.638666	0.401582	0.545197	0.305702	0.357447	4	2.40262	0.0966032	0.023694	0.0510536	Not Significant	Not Significant	0.263447	0.396225
P70699	Lysosomal alpha-glucosidase	Gaa	21588000	22714000	25397000	12455000	11399000	11826000	0.963625	12.2697	5.75663	0.000253408	0.000953665	0.0186422	0.0107542	4	2.40262	0.0966032	0.00925204	0.042031	Not Significant	Not Significant	3.0206	3.59618
P80313	T-complex protein 1 subunit eta	Cct7	690180000	488760000	658580000	919060000	974080000	912310000	-0.626089	-3.94397	-3.13393	0.0169034	0.0185584	0.0517299	0.0405855	4	2.40262	0.0966032	0.0378004	0.0598665	Not Significant	Not Significant	1.73146	1.77203
P80314	T-complex protein 1 subunit beta	Cct2	1333000000	665850000	691270000	1514200000	1239200000	1292000000	-0.660768	-1.96139	-2.14301	0.12136	0.0729647	0.138214	0.0956816	4	2.40262	0.0966032	0.170239	0.142607	Not Significant	Not Significant	1.13689	0.915923
P80315	T-complex protein 1 subunit delta	Cct4	983800000	674450000	764020000	1403200000	1411600000	1284900000	-0.775935	-4.67112	-3.81323	0.00951035	0.00780986	0.0417894	0.026741	4	2.40262	0.0966032	0.0413904	0.0621093	Not Significant	Not Significant	2.10736	2.0218
P80316	T-complex protein 1 subunit epsilon	Cct5	1594200000	1090600000	1147000000	2223600000	2156300000	1924800000	-0.736781	-4.02537	-3.46948	0.0157939	0.0119982	0.0510938	0.0323901	4	2.40262	0.0966032	0.0502523	0.0676457	Not Significant	Not Significant	1.92088	1.80151
P80317	T-complex protein 1 subunit zeta	Cct6a	1062600000	835710000	899190000	1546100000	1522300000	1412000000	-0.685752	-6.22159	-3.8481	0.00339797	0.0074845	0.0284036	0.026032	4	2.40262	0.0966032	0.0182231	0.0476357	Not Significant	Not Significant	2.12584	2.46878
P80318	T-complex protein 1 subunit gamma	Cct3	1095900000	771570000	738230000	1413000000	1442000000	1506000000	-0.765809	-4.19991	-3.61252	0.0136968	0.0100131	0.0485815	0.0298028	4	2.40262	0.0966032	0.0498715	0.0674079	Not Significant	Not Significant	1.99943	1.86338
P81117	Nucleobindin-2;Nesfatin-1	Nucb2	74865000	93151000	143420000	69655000	61696000	79936000	0.513929	1.73664	1.82986	0.157456	0.113915	0.164632	0.128832	4	2.40262	0.0966032	0.131365	0.11832	Not Significant	Not Significant	0.943418	0.802841
P82198	Transforming growth factor-beta-induced protein ig-h3	Tgfbi	51367000	37111000	37300000	27714000	0	0	1.92026	2.7854	3.38879	0.0495442	0.0133048	0.0807976	0.034265	4	2.40262	0.0966032	0.712912	0.481639	Not Significant	Not Significant	1.87599	1.30501
P82343	N-acylglucosamine 2-epimerase	Renbp	0	184540000	160100000	39749000	0	39528000	1.46076	1.01924	1.27753	0.365721	0.245781	0.289929	0.216465	4	2.40262	0.0966032	3.08103	1.96111	Not Significant	Not Significant	0.609452	0.43685
P83741	Serine/threonine-protein kinase WNK1	Wnk1	25309000	23613000	27138000	26213000	31428000	24018000	-0.0956342	-0.746557	-0.515482	0.49682	0.623528	0.345124	0.389224	4	2.40262	0.0966032	0.0246145	0.0516287	Not Significant	Not Significant	0.205144	0.303801
P83870	PHD finger-like domain-containing protein 5A	Phf5a	44183000	12440000	22129000	36884000	16000000	33706000	-0.236552	-0.362777	-0.439421	0.735128	0.674802	0.435353	0.404964	4	2.40262	0.0966032	0.63777	0.434694	Not Significant	Not Significant	0.170823	0.133637
P83882	60S ribosomal protein L36a	Rpl36a	20976000	18777000	22293000	44598000	44658000	29756000	-0.91826	-4.4155	-4.05871	0.0115512	0.00581123	0.0448775	0.0229107	4	2.40262	0.0966032	0.064873	0.07678	Not Significant	Not Significant	2.23573	1.93737
P83887	Tubulin gamma-1 chain;Tubulin gamma-2 chain	Tubg1	11630000	0	13894000	10599000	11972000	10611000	0.0449528	0.244152	0.2111	0.819125	0.839369	0.4618	0.456994	4	2.40262	0.0966032	0.0508494	0.0680188	Not Significant	Not Significant	0.076047	0.0866497
P83917	Chromobox protein homolog 1	Cbx1	40130000	45908000	25787000	33919000	46165000	38029000	-0.108641	-0.384054	-0.398942	0.720481	0.702904	0.431479	0.414953	4	2.40262	0.0966032	0.120031	0.111239	Not Significant	Not Significant	0.153104	0.142378
P83940	Transcription elongation factor B polypeptide 1	Eloc	109140000	65968000	114100000	112830000	125210000	109370000	-0.3038	-1.16733	-1.17824	0.307918	0.280628	0.258443	0.235747	4	2.40262	0.0966032	0.101597	0.0997232	Not Significant	Not Significant	0.551868	0.511565
P84078	ADP-ribosylation factor 1;ADP-ribosylation factor 3	Arf1	372230000	420590000	183860000	518190000	454150000	366330000	-0.527526	-1.3201	-1.49849	0.257276	0.1816	0.229039	0.176492	4	2.40262	0.0966032	0.239532	0.185897	Not Significant	Not Significant	0.740885	0.589601
P84084	ADP-ribosylation factor 5	Arf5	84772000	67734000	71925000	82458000	56425000	52023000	0.256939	1.13443	1.08368	0.319987	0.317619	0.265053	0.255634	4	2.40262	0.0966032	0.0769477	0.0843235	Not Significant	Not Significant	0.498094	0.494868
P84089	Enhancer of rudimentary homolog	Erh	179250000	144130000	164170000	148050000	237520000	246240000	-0.343221	-1.35386	-1.35334	0.24722	0.221777	0.222619	0.201134	4	2.40262	0.0966032	0.0964028	0.096478	Not Significant	Not Significant	0.654084	0.606917
P84091	AP-2 complex subunit mu	Ap2m1	270790000	321670000	361090000	245420000	196150000	222050000	0.519007	3.40063	2.63759	0.0272615	0.036387	0.061795	0.0626929	4	2.40262	0.0966032	0.0349396	0.0580792	Not Significant	Not Significant	1.43905	1.56445
P84096	Rho-related GTP-binding protein RhoG	Rhog	93340000	88973000	104340000	44934000	35684000	40590000	1.24496	10.5622	6.86923	0.00045458	0.000353828	0.0186422	0.00688953	4	2.40262	0.0966032	0.0208396	0.0492703	Not Significant	Not Significant	3.45121	3.34239
P84099	60S ribosomal protein L19	Rpl19	107550000	120080000	155720000	149530000	116720000	110770000	0.0189679	0.0916037	0.0840294	0.931417	0.935599	0.491392	0.48432	4	2.40262	0.0966032	0.0643138	0.0764306	Not Significant	Not Significant	0.0289101	0.0308558
P84104	Serine/arginine-rich splicing factor 3	Srsf3	183090000	128760000	228190000	236690000	199750000	256250000	-0.390424	-1.48598	-1.50504	0.211476	0.179955	0.201121	0.175516	4	2.40262	0.0966032	0.103548	0.100942	Not Significant	Not Significant	0.744837	0.67474
P84228	Histone H3.2	Hist1h3b	1225800000	1229400000	1426400000	1463100000	1167400000	681750000	0.294805	0.880935	0.960869	0.428103	0.371488	0.317054	0.282541	4	2.40262	0.0966032	0.167986	0.141199	Not Significant	Not Significant	0.430055	0.368451
P84244	Histone H3.3;Histone H3.3C	H3f3a	610200000	125370000	90636000	934010000	211710000	137730000	-0.657913	-0.551712	-0.688705	0.610517	0.515178	0.392535	0.345618	4	2.40262	0.0966032	2.13306	1.36887	Not Significant	Not Significant	0.288043	0.214302
P85094	Isochorismatase domain-containing protein 2A, mitochondrial	Isoc2a	108930000	25539000	40603000	115230000	48849000	64824000	-0.563895	-0.786963	-0.96013	0.475312	0.371833	0.33645	0.282541	4	2.40262	0.0966032	0.770155	0.517401	Not Significant	Not Significant	0.429652	0.323022
P86049	Probable RNA-binding protein 46	Rbm46	7920300	0	0	6340100	10858000	0	0.417928	0.618728	0.751583	0.56959	0.47901	0.376523	0.331396	4	2.40262	0.0966032	0.684374	0.46381	Not Significant	Not Significant	0.319655	0.244437
P97290	Plasma protease C1 inhibitor	Serping1	80212000	221410000	203580000	31612000	27169000	87150000	1.86469	2.63975	3.21734	0.0575957	0.016626	0.0878037	0.0381674	4	2.40262	0.0966032	0.748476	0.503857	Not Significant	Not Significant	1.77921	1.23961
P97298	Pigment epithelium-derived factor	Serpinf1	30191000	93850000	99225000	0	0	35172000	2.51919	2.54297	3.1557	0.0637791	0.0180317	0.0933547	0.0401952	4	2.40262	0.0966032	1.47207	0.955917	Not Significant	Significant	1.74396	1.19532
P97300	Neuroplastin	Nptn	8773900	0	0	6577200	0	0	0.34096	0.910463	1.0198	0.414081	0.344801	0.31146	0.270901	4	2.40262	0.0966032	0.210365	0.167675	Not Significant	Not Significant	0.462431	0.382915
P97310	DNA replication licensing factor MCM2	Mcm2	17401000	21173000	16989000	15544000	23873000	24465000	-0.17882	-0.760639	-0.738096	0.489242	0.48662	0.342718	0.334567	4	2.40262	0.0966032	0.0829023	0.0880436	Not Significant	Not Significant	0.31281	0.310476
P97311	DNA replication licensing factor MCM6	Mcm6	18963000	21403000	26132000	18686000	22610000	21083000	0.0839396	0.534703	0.422008	0.621195	0.686825	0.396607	0.408731	4	2.40262	0.0966032	0.0369658	0.0593451	Not Significant	Not Significant	0.163154	0.206772
P97315	Cysteine and glycine-rich protein 1	Csrp1	137500000	455690000	231890000	129660000	148200000	277040000	0.482851	0.799944	0.962269	0.468556	0.370836	0.334211	0.282541	4	2.40262	0.0966032	0.54651	0.37768	Not Significant	Not Significant	0.430818	0.329238
P97324	Glucose-6-phosphate 1-dehydrogenase 2	G6pd2	14261000	0	0	26486000	0	0	0.19282	0.217499	0.268642	0.838464	0.796653	0.466773	0.445786	4	2.40262	0.0966032	1.17891	0.772769	Not Significant	Not Significant	0.0987305	0.0765158
P97346	Nucleoredoxin	Nxn	11469000	8500800	11995000	11739000	16773000	11530000	-0.319	-1.35627	-1.31633	0.246518	0.233223	0.222366	0.208242	4	2.40262	0.0966032	0.0829811	0.0880929	Not Significant	Not Significant	0.632229	0.608152
P97351	40S ribosomal protein S3a	Rps3a	441430000	338590000	447880000	529020000	407800000	324470000	-0.0214776	-0.0886388	-0.0870696	0.933629	0.933276	0.491566	0.483738	4	2.40262	0.0966032	0.0880674	0.0912705	Not Significant	Not Significant	0.0299899	0.0298254
P97364	Selenide, water dikinase 2	Sephs2	77775000	51023000	67770000	116360000	127920000	125800000	-0.933217	-5.07382	-4.38454	0.00711137	0.00398091	0.0379047	0.0192625	4	2.40262	0.0966032	0.0507442	0.067953	Not Significant	Not Significant	2.40002	2.14805
P97370	Sodium/potassium-transporting ATPase subunit beta-3	Atp1b3	40372000	39625000	27497000	52026000	40615000	33085000	-0.222794	-0.853258	-0.862266	0.441598	0.419661	0.324069	0.306751	4	2.40262	0.0966032	0.102268	0.100142	Not Significant	Not Significant	0.377102	0.354972
P97371	Proteasome activator complex subunit 1	Psme1	271810000	354090000	411160000	178730000	162640000	183970000	0.962493	5.2699	4.53688	0.00621258	0.00335366	0.0362047	0.0183495	4	2.40262	0.0966032	0.050036	0.0675106	Not Significant	Not Significant	2.47448	2.20673
P97372	Proteasome activator complex subunit 2	Psme2	199410000	220800000	213830000	113080000	102170000	123200000	0.908542	10.1744	5.3215	0.00052559	0.00146048	0.0186422	0.0128979	4	2.40262	0.0966032	0.0119608	0.0437233	Not Significant	Not Significant	2.8355	3.27935
P97377	Cyclin-dependent kinase 2	Cdk2	6938600	6335500	0	7373200	12254000	0	-0.279187	-1.01324	-1.04338	0.368253	0.334557	0.291094	0.265173	4	2.40262	0.0966032	0.113882	0.107398	Not Significant	Not Significant	0.47553	0.433853
P97379	Ras GTPase-activating protein-binding protein 2	G3bp2	61811000	44146000	56955000	46191000	53408000	50274000	0.108496	0.685263	0.54365	0.530827	0.605083	0.360181	0.382138	4	2.40262	0.0966032	0.0376016	0.0597423	Not Significant	Not Significant	0.218185	0.275047
P97384	Annexin A11	Anxa11	72450000	82726000	77846000	43616000	38536000	36874000	0.97076	10.6448	5.66515	0.000441035	0.00104105	0.0186422	0.0111424	4	2.40262	0.0966032	0.012475	0.0440446	Not Significant	Not Significant	2.98253	3.35553
P97386	DNA ligase 3	Lig3	29947000	15716000	10479000	42807000	40753000	24745000	-1.04325	-2.05247	-2.42175	0.109383	0.0491872	0.130354	0.0744383	4	2.40262	0.0966032	0.387535	0.278361	Not Significant	Not Significant	1.30815	0.961052
P97390	Vacuolar protein sorting-associated protein 45	Vps45	5345200	9384600	5956400	5445100	0	9020000	-0.231513	-0.635313	-0.707329	0.559751	0.504283	0.372728	0.340713	4	2.40262	0.0966032	0.19919	0.160694	Not Significant	Not Significant	0.297326	0.252005
P97401	Secreted frizzled-related protein 3	Frzb	0	15477000	0	0	16674000	15183000	-0.370722	-1.13468	-1.22991	0.319892	0.262	0.265053	0.225663	4	2.40262	0.0966032	0.160117	0.136283	Not Significant	Not Significant	0.581698	0.494996
P97429	Annexin A4	Anxa4	472260000	363240000	316350000	117540000	94506000	101410000	1.8634	9.64392	8.55063	0.000646592	9.84286e-05	0.0186422	0.0036153	4	2.40262	0.0966032	0.056001	0.0712372	Not Significant	Not Significant	4.00688	3.18937
P97434	Myosin phosphatase Rho-interacting protein	Mprip	51705000	40276000	59414000	98993000	107360000	65924000	-0.833829	-3.05902	-3.13847	0.0376946	0.0184471	0.0709889	0.0405084	4	2.40262	0.0966032	0.11145	0.105879	Not Significant	Not Significant	1.73407	1.42372
P97447	Four and a half LIM domains protein 1	Fhl1	74778000	105220000	106800000	95969000	103970000	120900000	-0.173872	-0.894966	-0.795709	0.421392	0.454684	0.31378	0.322472	4	2.40262	0.0966032	0.0566157	0.0716212	Not Significant	Not Significant	0.342291	0.375314
P97449	Aminopeptidase N	Anpep	561610000	297370000	171770000	12694000	7370200	7069000	5.13486	9.10771	10.8798	0.000806106	2.29947e-05	0.0192234	0.00198335	4	2.40262	0.0966032	0.476794	0.334125	Significant	Significant	4.63837	3.09361
P97450	ATP synthase-coupling factor 6, mitochondrial	Atp5j	102300000	96906000	121530000	86835000	108300000	123880000	0.0161505	0.0902463	0.0768411	0.93243	0.941095	0.491566	0.485527	4	2.40262	0.0966032	0.04804	0.0662636	Not Significant	Not Significant	0.0263663	0.0303838
P97461	40S ribosomal protein S5;40S ribosomal protein S5, N-terminally processed	Rps5	197190000	88325000	99066000	166890000	90336000	61929000	0.295328	0.535115	0.637725	0.620934	0.545771	0.396595	0.357456	4	2.40262	0.0966032	0.456885	0.321687	Not Significant	Not Significant	0.262989	0.206954
P97470	Serine/threonine-protein phosphatase 4 catalytic subunit	Ppp4c	19920000	30895000	28993000	29341000	53618000	40584000	-0.613084	-1.9178	-2.06655	0.127594	0.0813475	0.143326	0.102389	4	2.40262	0.0966032	0.153293	0.13202	Not Significant	Not Significant	1.08966	0.894171
P97473	RISC-loading complex subunit TARBP2	Tarbp2	13711000	9432700	0	26766000	30258000	25533000	-1.36182	-7.00324	-6.22943	0.00218834	0.000615659	0.0253875	0.00876531	4	2.40262	0.0966032	0.0567198	0.0716863	Not Significant	Not Significant	3.21066	2.65989
P97479	Unconventional myosin-VIIa	Myo7a	96351000	103630000	102290000	109140000	96486000	86844000	0.0531363	0.528131	0.3043	0.62535	0.770549	0.397801	0.438952	4	2.40262	0.0966032	0.0151841	0.0457371	Not Significant	Not Significant	0.1132	0.203877
P97493	Thioredoxin, mitochondrial	Txn2	0	25132000	0	0	22090000	24846000	-0.416362	-0.74477	-0.888856	0.497789	0.406234	0.345127	0.299783	4	2.40262	0.0966032	0.468801	0.329132	Not Significant	Not Significant	0.391224	0.302955
P97494	Glutamate--cysteine ligase catalytic subunit	Gclc	49296000	55373000	60668000	39792000	53285000	47549000	0.238655	1.58979	1.22033	0.187086	0.265371	0.186111	0.227158	4	2.40262	0.0966032	0.0338028	0.057369	Not Significant	Not Significant	0.576146	0.72796
P97742	Carnitine O-palmitoyltransferase 1, liver isoform	Cpt1a	90413000	113510000	123540000	81870000	73269000	86178000	0.431442	2.85377	2.20036	0.0462193	0.0672568	0.0778601	0.0911768	4	2.40262	0.0966032	0.0342846	0.05767	Not Significant	Not Significant	1.17226	1.33518
P97760	DNA-directed RNA polymerase II subunit RPB3	Polr2c	6859500	7646100	7098300	8328100	8222800	9153300	-0.250536	-3.72773	-1.52502	0.0203371	0.175021	0.0553292	0.172053	4	2.40262	0.0966032	0.00677554	0.0404839	Not Significant	Not Significant	0.756911	1.69171
P97765	WW domain-binding protein 2	Wbp2	0	17431000	0	0	22359000	28190000	-0.106005	-0.131003	-0.161052	0.902097	0.877015	0.483372	0.467316	4	2.40262	0.0966032	0.98216	0.64985	Not Significant	Not Significant	0.056993	0.0447466
P97770	THUMP domain-containing protein 3	Thumpd3	0	6791100	0	0	6801500	0	-0.90968	-1.36291	-1.65399	0.244592	0.146093	0.222201	0.153017	4	2.40262	0.0966032	0.668244	0.453733	Not Significant	Not Significant	0.83537	0.611557
P97807	Fumarate hydratase, mitochondrial	Fh	165150000	175420000	206090000	155160000	148670000	151120000	0.258767	2.66664	1.49274	0.0560018	0.183054	0.086226	0.177681	4	2.40262	0.0966032	0.0141247	0.0450752	Not Significant	Not Significant	0.737421	1.2518
P97819	85/88 kDa calcium-independent phospholipase A2	Pla2g6	20379000	13714000	16590000	34203000	52928000	38872000	-1.30795	-5.24531	-5.21046	0.00631735	0.00163453	0.0364277	0.0132086	4	2.40262	0.0966032	0.0932672	0.094519	Not Significant	Not Significant	2.78661	2.19946
P97820	Mitogen-activated protein kinase kinase kinase kinase 4;Misshapen-like kinase 1;Traf2 and NCK-interacting protein kinase	Map4k4	6272100	6344000	6960300	6335600	6083700	0	-0.315541	-0.810929	-0.915639	0.462898	0.393036	0.332564	0.292987	4	2.40262	0.0966032	0.22711	0.178137	Not Significant	Not Significant	0.405568	0.334515
P97822	Acidic leucine-rich nuclear phosphoprotein 32 family member E	Anp32e	0	69894000	44737000	0	43007000	54863000	-0.249052	-0.217499	-0.271202	0.838464	0.794769	0.466773	0.445062	4	2.40262	0.0966032	1.96679	1.26499	Not Significant	Not Significant	0.0997589	0.0765158
P97823	Acyl-protein thioesterase 1	Lypla1	80937000	48653000	51904000	105400000	53482000	54039000	-0.191894	-0.482613	-0.547292	0.654593	0.602721	0.408731	0.381391	4	2.40262	0.0966032	0.237148	0.184408	Not Significant	Not Significant	0.219884	0.184028
P97855	Ras GTPase-activating protein-binding protein 1	G3bp1	75473000	48600000	75905000	83921000	67069000	63344000	-0.118925	-0.482585	-0.4772	0.654611	0.649075	0.408731	0.397454	4	2.40262	0.0966032	0.0910935	0.093161	Not Significant	Not Significant	0.187705	0.184017
P97930	Thymidylate kinase	Dtymk	34399000	25248000	32419000	53813000	59492000	63183000	-0.948271	-6.21817	-4.82055	0.00340485	0.00245888	0.0284036	0.0160362	4	2.40262	0.0966032	0.0348843	0.0580447	Not Significant	Not Significant	2.60926	2.4679
P98078	Disabled homolog 2	Dab2	49802000	66577000	74402000	10655000	10188000	15652000	2.39394	9.1495	9.25297	0.000792034	6.13955e-05	0.0192234	0.00300676	4	2.40262	0.0966032	0.102689	0.100405	Significant	Significant	4.21186	3.10126
P98192	Dihydroxyacetone phosphate acyltransferase	Gnpat	0	0	15043000	0	14334000	0	0.642779	0.914111	1.11376	0.412375	0.305439	0.310727	0.24845	4	2.40262	0.0966032	0.741682	0.499613	Not Significant	Not Significant	0.515075	0.384707
P99024	Tubulin beta-5 chain	Tubb5	750240000	1153800000	794850000	851600000	1128100000	1015100000	-0.167731	-0.736519	-0.705222	0.502276	0.505508	0.346823	0.341398	4	2.40262	0.0966032	0.0777947	0.0848527	Not Significant	Not Significant	0.296272	0.299057
P99026	Proteasome subunit beta type-4	Psmb4	143370000	162810000	170920000	187060000	225640000	218890000	-0.403825	-3.57735	-2.25294	0.0232226	0.0624237	0.0582654	0.0873461	4	2.40262	0.0966032	0.0191142	0.0481923	Not Significant	Not Significant	1.20465	1.63409
P99027	60S acidic ribosomal protein P2	Rplp2	472480000	691200000	463090000	521640000	662150000	794290000	-0.28641	-1.11333	-1.11899	0.327955	0.303362	0.269884	0.247487	4	2.40262	0.0966032	0.0992696	0.098269	Not Significant	Not Significant	0.51804	0.484186
P99028	Cytochrome b-c1 complex subunit 6, mitochondrial	Uqcrh	29748000	33499000	34640000	38885000	46902000	38222000	-0.337972	-2.92174	-1.87396	0.0431685	0.106997	0.0753853	0.123515	4	2.40262	0.0966032	0.0200711	0.0487902	Not Significant	Not Significant	0.970627	1.36483
P99029	Peroxiredoxin-5, mitochondrial	Prdx5	337180000	327690000	368430000	231970000	296430000	270580000	0.376519	3.27144	2.09039	0.0307474	0.0786343	0.0654536	0.100505	4	2.40262	0.0966032	0.0198695	0.0486642	Not Significant	Not Significant	1.10439	1.51219
Q00493	Carboxypeptidase E	Cpe	11874000	0	0	7412500	0	0	-0.108412	-0.234875	-0.273373	0.82584	0.793173	0.464258	0.444476	4	2.40262	0.0966032	0.319574	0.235903	Not Significant	Not Significant	0.100632	0.0831043
Q00519	Xanthine dehydrogenase/oxidase;Xanthine dehydrogenase;Xanthine oxidase	Xdh	98653000	204600000	177520000	7420800	2046200	10122000	4.83628	6.23132	7.64211	0.00337845	0.000190908	0.0284036	0.00492325	4	2.40262	0.0966032	0.903556	0.600742	Significant	Significant	3.71918	2.47128
Q00612	Glucose-6-phosphate 1-dehydrogenase X	G6pdx	246170000	289560000	297570000	113450000	128240000	135930000	1.14099	9.9315	6.33756	0.000577158	0.000558972	0.0186422	0.00850917	4	2.40262	0.0966032	0.0197983	0.0486198	Not Significant	Not Significant	3.25261	3.23871
Q00623	Apolipoprotein A-I;Proapolipoprotein A-I;Truncated apolipoprotein A-I	Apoa1	1683700000	4186600000	3328300000	576110000	784650000	1881600000	1.59523	2.46973	2.98912	0.0689669	0.0225133	0.0977911	0.0455944	4	2.40262	0.0966032	0.625809	0.427222	Not Significant	Not Significant	1.64756	1.16136
Q00724	Retinol-binding protein 4	Rbp4	0	13406000	0	0	0	8115400	-0.219756	-0.56306	-0.636155	0.603458	0.546731	0.38983	0.357456	4	2.40262	0.0966032	0.228488	0.178997	Not Significant	Not Significant	0.262226	0.219353
Q00896	Alpha-1-antitrypsin 1-3	Serpina1c	3371900000	6589200000	2853100000	4021100000	2215800000	5658200000	0.110145	0.203719	0.242211	0.848517	0.81619	0.469511	0.450655	4	2.40262	0.0966032	0.438486	0.310192	Not Significant	Not Significant	0.0882087	0.0713392
Q00915	Retinol-binding protein 1	Rbp1	108850000	200110000	158990000	48293000	55583000	75935000	1.36221	4.24831	4.5816	0.0131758	0.00319108	0.048114	0.0182093	4	2.40262	0.0966032	0.154222	0.1326	Not Significant	Not Significant	2.49606	1.88022
Q00PI9	Heterogeneous nuclear ribonucleoprotein U-like protein 2	Hnrnpul2	138210000	152530000	208900000	123060000	121000000	138140000	0.366089	1.93217	1.69597	0.125501	0.1377	0.141751	0.147183	4	2.40262	0.0966032	0.0538485	0.0698924	Not Significant	Not Significant	0.861067	0.901351
Q01149	Collagen alpha-2(I) chain	Col1a2	561210000	690550000	2172500000	119440000	21210000	47541000	4.25707	4.51862	5.59617	0.0106695	0.00111294	0.0438318	0.0116418	4	2.40262	0.0966032	1.33138	0.868023	Significant	Significant	2.95353	1.97185
Q01279	Epidermal growth factor receptor	Egfr	5783300	13148000	8441400	8754700	7481700	11672000	-0.0840857	-0.215301	-0.243284	0.840065	0.815394	0.466878	0.450524	4	2.40262	0.0966032	0.228793	0.179188	Not Significant	Not Significant	0.0886324	0.0756873
Q01320	DNA topoisomerase 2-alpha	Top2a	227720000	138870000	184980000	276080000	230640000	167340000	-0.288382	-0.975398	-1.02746	0.384593	0.341444	0.298413	0.26946	4	2.40262	0.0966032	0.131118	0.118166	Not Significant	Not Significant	0.46668	0.414998
Q01339	Beta-2-glycoprotein 1	Apoh	45472000	31677000	78304000	14220000	21097000	28229000	1.24512	2.6183	3.06111	0.0589045	0.0204444	0.0888432	0.0429659	4	2.40262	0.0966032	0.339216	0.248174	Not Significant	Not Significant	1.68943	1.22985
Q01405	Protein transport protein Sec23A	Sec23a	78461000	93284000	83741000	63478000	79442000	66311000	0.291378	2.3701	1.58937	0.0768123	0.159974	0.10537	0.16189	4	2.40262	0.0966032	0.0226709	0.0504144	Not Significant	Not Significant	0.795951	1.11457
Q01730	Ras suppressor protein 1	Rsu1	42465000	56018000	57340000	20707000	19305000	22426000	1.30915	8.58311	6.65465	0.00101218	0.000424089	0.0207512	0.00757542	4	2.40262	0.0966032	0.0348963	0.0580521	Not Significant	Not Significant	3.37254	2.99474
Q01755	T-complex protein 11	Tcp11	333380000	83746000	173250000	619150000	418500000	473440000	-1.55486	-2.59448	-3.1188	0.0603981	0.0189343	0.0905637	0.0412888	4	2.40262	0.0966032	0.538733	0.372821	Not Significant	Not Significant	1.72275	1.21898
Q01768	Nucleoside diphosphate kinase B	Nme2	1096300000	1262400000	1205000000	988550000	1151700000	1055700000	0.157498	1.79969	0.925627	0.14629	0.388197	0.156891	0.290586	4	2.40262	0.0966032	0.011488	0.0434279	Not Significant	Not Significant	0.410948	0.834784
Q01853	Transitional endoplasmic reticulum ATPase	Vcp	3676100000	2466500000	3515000000	3996300000	2927900000	2824600000	-0.0174706	-0.0722825	-0.0709321	0.945847	0.945616	0.495202	0.487165	4	2.40262	0.0966032	0.0876274	0.0909956	Not Significant	Not Significant	0.0242852	0.0241791
Q02053	Ubiquitin-like modifier-activating enzyme 1	Uba1	1176500000	1265900000	1401000000	1054100000	1081400000	1110000000	0.24055	3.15881	1.44298	0.034223	0.196108	0.0681168	0.185886	4	2.40262	0.0966032	0.00869869	0.0416853	Not Significant	Not Significant	0.707504	1.46568
Q02248	Catenin beta-1	Ctnnb1	22609000	36926000	27295000	16148000	20252000	22140000	0.551365	2.23505	2.21101	0.0891096	0.0662478	0.116021	0.090887	4	2.40262	0.0966032	0.0912839	0.09328	Not Significant	Not Significant	1.17883	1.05008
Q02788	Collagen alpha-2(VI) chain	Col6a2	491470000	1477800000	1228500000	228160000	45699000	118090000	3.16705	3.80032	4.67949	0.0190984	0.00286509	0.0542076	0.0171278	4	2.40262	0.0966032	1.04174	0.687073	Significant	Significant	2.54286	1.719
Q02819	Nucleobindin-1	Nucb1	160070000	174310000	216140000	161450000	191970000	199080000	-0.0109974	-0.0691221	-0.0549997	0.94821	0.957815	0.495795	0.489084	4	2.40262	0.0966032	0.0379699	0.0599723	Not Significant	Not Significant	0.0187183	0.0230955
Q03147	Cyclin-dependent kinase 7	Cdk7	6820700	0	0	8886600	0	0	-0.0875432	-0.197108	-0.228017	0.853354	0.826742	0.470655	0.452615	4	2.40262	0.0966032	0.29589	0.221106	Not Significant	Not Significant	0.0826301	0.0688709
Q03173	Protein enabled homolog	Enah	28952000	20237000	16200000	21736000	26898000	21357000	-0.131881	-0.495022	-0.503856	0.646543	0.631229	0.405639	0.391611	4	2.40262	0.0966032	0.106464	0.102764	Not Significant	Not Significant	0.199813	0.189403
Q03265	ATP synthase subunit alpha, mitochondrial	Atp5a1	1913500000	2325000000	2751100000	1542400000	1991000000	1828000000	0.374839	2.01453	1.75157	0.114208	0.12729	0.133112	0.139186	4	2.40262	0.0966032	0.0519319	0.0686951	Not Significant	Not Significant	0.895205	0.942304
Q03734	Serine protease inhibitor A3M	Serpina3m	0	0	13986000	0	0	8415800	0.655998	1.50688	1.73737	0.206317	0.129874	0.197615	0.141342	4	2.40262	0.0966032	0.284276	0.213851	Not Significant	Not Significant	0.886477	0.685465
Q03958	Prefoldin subunit 6	Pfdn6	41303000	33280000	34668000	32924000	45910000	60719000	-0.315196	-1.15658	-1.18653	0.311815	0.277566	0.260649	0.234246	4	2.40262	0.0966032	0.111405	0.105851	Not Significant	Not Significant	0.556634	0.506103
Q04207	Transcription factor p65	Rela	13097000	10041000	16427000	9368900	12109000	6279500	0.533485	1.55239	1.7046	0.195523	0.136031	0.191422	0.145592	4	2.40262	0.0966032	0.177148	0.146923	Not Significant	Not Significant	0.866361	0.708802
Q04447	Creatine kinase B-type	Ckb	523530000	780010000	595720000	80420000	128060000	164420000	2.38886	6.89307	7.58458	0.00232218	0.00019952	0.0256392	0.00493347	4	2.40262	0.0966032	0.180155	0.148802	Significant	Significant	3.70001	2.6341
Q04750	DNA topoisomerase 1	Top1	31443000	15303000	20967000	55339000	8513800	13333000	0.227834	0.262549	0.323953	0.805866	0.756297	0.457147	0.434818	4	2.40262	0.0966032	1.12955	0.741931	Not Significant	Not Significant	0.121308	0.0937373
Q04857	Collagen alpha-1(VI) chain	Col6a1	698500000	2072400000	1850600000	378220000	89572000	209910000	2.85243	3.64654	4.47423	0.0218381	0.00359721	0.0564341	0.018753	4	2.40262	0.0966032	0.917825	0.609657	Significant	Significant	2.44403	1.66079
Q04997	Inhibin alpha chain	Inha	19216000	31528000	50031000	9843300	10928000	9143200	1.64858	4.06528	4.62771	0.0152821	0.00303263	0.0502291	0.017594	4	2.40262	0.0966032	0.246679	0.190362	Not Significant	Not Significant	2.51818	1.81582
Q05186	Reticulocalbin-1	Rcn1	0	46027000	37505000	0	19278000	23682000	0.646342	0.627552	0.779867	0.564341	0.463316	0.374509	0.325955	4	2.40262	0.0966032	1.59117	1.03033	Not Significant	Not Significant	0.334123	0.248458
Q05793	Basement membrane-specific heparan sulfate proteoglycan core protein;Endorepellin;LG3 peptide	Hspg2	236640000	249910000	325060000	119230000	16500000	13717000	3.15883	3.13247	3.88981	0.0351017	0.00711488	0.0689198	0.025106	4	2.40262	0.0966032	1.52535	0.989208	Significant	Significant	2.14783	1.45467
Q05816	Fatty acid-binding protein, epidermal	Fabp5	1731200000	931500000	659260000	152180000	152100000	181090000	2.6622	6.39998	7.32005	0.00306098	0.000245292	0.0284036	0.00543655	4	2.40262	0.0966032	0.259546	0.198401	Significant	Significant	3.61032	2.51414
Q05920	Pyruvate carboxylase, mitochondrial	Pc	238150000	295400000	351110000	267620000	280460000	269470000	0.0961193	0.588376	0.475627	0.587897	0.650136	0.383696	0.397609	4	2.40262	0.0966032	0.0400315	0.0612603	Not Significant	Not Significant	0.186996	0.230699
Q05CL8	La-related protein 7	Larp7	64538000	36184000	50989000	104590000	64880000	41991000	-0.419613	-0.930648	-1.07922	0.404717	0.31946	0.306643	0.256604	4	2.40262	0.0966032	0.304943	0.226763	Not Significant	Not Significant	0.495584	0.392849
Q05D44	Eukaryotic translation initiation factor 5B	Eif5b	91214000	51504000	66178000	90025000	55652000	31146000	0.331495	0.659155	0.776661	0.545811	0.465077	0.366198	0.325955	4	2.40262	0.0966032	0.379376	0.273264	Not Significant	Not Significant	0.332475	0.262958
Q06138	Calcium-binding protein 39	Cab39	72809000	63879000	67409000	83155000	94890000	75556000	-0.309069	-2.81194	-1.7355	0.0482216	0.130218	0.0797216	0.141439	4	2.40262	0.0966032	0.0181213	0.047572	Not Significant	Not Significant	0.885328	1.31676
Q06185	ATP synthase subunit e, mitochondrial	Atp5i	76963000	87905000	0	64763000	82642000	77008000	-0.824211	-0.844675	-1.04759	0.445853	0.332755	0.325794	0.263874	4	2.40262	0.0966032	1.4282	0.928509	Not Significant	Not Significant	0.477875	0.350809
Q06335	Amyloid-like protein 2	Aplp2	9693600	0	0	11437000	0	0	-0.288391	-0.703596	-0.802554	0.520483	0.450988	0.355511	0.321438	4	2.40262	0.0966032	0.252004	0.193689	Not Significant	Not Significant	0.345835	0.283594
Q06770	Corticosteroid-binding globulin	Serpina6	104270000	753990000	1023400000	24496000	37135000	90305000	3.31194	2.82475	3.52454	0.0475981	0.0111873	0.0791082	0.0311415	4	2.40262	0.0966032	2.06204	1.3245	Significant	Significant	1.95128	1.32241
Q06890	Clusterin;Clusterin beta chain;Clusterin alpha chain	Clu	321850000	492440000	509890000	367880000	484590000	484640000	-0.0321303	-0.12791	-0.127417	0.904393	0.902519	0.48385	0.475109	4	2.40262	0.0966032	0.0946487	0.0953821	Not Significant	Not Significant	0.0445437	0.0436426
Q07076	Annexin A7	Anxa7	61075000	83202000	80620000	27195000	30167000	31093000	1.33515	8.70851	6.77362	0.000957482	0.000383353	0.0201541	0.00728879	4	2.40262	0.0966032	0.0352582	0.0582783	Not Significant	Not Significant	3.4164	3.01887
Q07133	Histone H1t	Hist1h1t	0	68700000	146710000	0	182020000	134290000	-0.307143	-0.154896	-0.195013	0.884405	0.851425	0.477825	0.460277	4	2.40262	0.0966032	5.89778	3.72086	Not Significant	Not Significant	0.0698536	0.0533489
Q07417	Short-chain specific acyl-CoA dehydrogenase, mitochondrial	Acads	288760000	276090000	354490000	225310000	186440000	159450000	0.692343	3.80446	3.26892	0.0190306	0.0155409	0.0541086	0.0372045	4	2.40262	0.0966032	0.0496762	0.0672858	Not Significant	Not Significant	1.80852	1.72055
Q07813	Apoptosis regulator BAX	Bax	19533000	22761000	0	9138900	0	0	1.25344	3.14052	3.56404	0.0348303	0.0106425	0.068633	0.03055	4	2.40262	0.0966032	0.238942	0.185529	Not Significant	Not Significant	1.97296	1.45804
Q08091	Calponin-1	Cnn1	29163000	267900000	81045000	31370000	45307000	68119000	0.903103	0.922121	1.1438	0.408651	0.293661	0.308813	0.243086	4	2.40262	0.0966032	1.43877	0.935112	Not Significant	Not Significant	0.532154	0.388648
Q08093	Calponin-2	Cnn2	0	33328000	16097000	0	8638200	12909000	0.679505	1.14722	1.37747	0.315243	0.214583	0.262979	0.196849	4	2.40262	0.0966032	0.526236	0.365014	Not Significant	Not Significant	0.668404	0.501355
Q08288	Cell growth-regulating nucleolar protein	Lyar	134750000	70024000	95592000	228860000	178520000	101810000	-0.735087	-1.66958	-1.92862	0.170325	0.0989941	0.173873	0.116439	4	2.40262	0.0966032	0.290772	0.217909	Not Significant	Not Significant	1.00439	0.768723
Q08331	Calretinin	Calb2	19595000	51650000	56013000	0	5415700	0	2.89365	5.49051	6.50801	0.00536143	0.000481239	0.0344178	0.00771697	4	2.40262	0.0966032	0.416638	0.296543	Significant	Significant	3.31764	2.27072
Q08857	Platelet glycoprotein 4	Cd36	67691000	84374000	87559000	39114000	41283000	35083000	1.04734	7.76412	5.55592	0.00148326	0.00115748	0.0225207	0.0116418	4	2.40262	0.0966032	0.0272948	0.0533032	Not Significant	Not Significant	2.93649	2.82878
Q08879	Fibulin-1	Fbln1	0	11811000	14701000	0	0	8894600	0.95246	1.51823	1.83285	0.203569	0.113433	0.196221	0.128467	4	2.40262	0.0966032	0.590351	0.405069	Not Significant	Not Significant	0.945261	0.691289
Q08943	FACT complex subunit SSRP1	Ssrp1	62423000	56085000	64043000	64054000	83569000	68696000	-0.237916	-1.84532	-1.27993	0.138739	0.244989	0.1518	0.216094	4	2.40262	0.0966032	0.0249342	0.0518284	Not Significant	Not Significant	0.610853	0.8578
Q0HA38	Tetratricopeptide repeat protein 21B	Ttc21b	47110000	19643000	25234000	89059000	61075000	52183000	-1.20117	-2.73305	-3.15615	0.0522784	0.0180211	0.0835739	0.0401952	4	2.40262	0.0966032	0.289737	0.217263	Not Significant	Not Significant	1.74422	1.28168
Q0P557	Mitochondria-eating protein	Spata18	19243000	6788400	0	23122000	37751000	24044000	-1.48377	-2.77919	-3.29938	0.0498597	0.0149364	0.0811278	0.0362405	4	2.40262	0.0966032	0.427548	0.303359	Not Significant	Not Significant	1.82575	1.30225
Q0P5Y3	Tubulin polymerization-promoting protein family member 2	Tppp2	30121000	17167000	11395000	44406000	110980000	91241000	-2.08462	-3.64744	-4.36348	0.0218208	0.00407749	0.0564341	0.0195541	4	2.40262	0.0966032	0.489969	0.342356	Significant	Significant	2.38961	1.66113
Q0P678	Zinc finger CCCH domain-containing protein 18	Zc3h18	12894000	0	0	10034000	0	0	-0.0875385	-0.206221	-0.236728	0.84669	0.820261	0.468816	0.451426	4	2.40262	0.0966032	0.270287	0.205111	Not Significant	Not Significant	0.0860478	0.0722757
Q0VGB7	Serine/threonine-protein phosphatase 4 regulatory subunit 2	Ppp4r2	18581000	12937000	11627000	28276000	21881000	14609000	-0.564435	-1.63768	-1.79954	0.176831	0.118925	0.178613	0.132398	4	2.40262	0.0966032	0.178181	0.147569	Not Significant	Not Significant	0.924728	0.752441
Q11011	Puromycin-sensitive aminopeptidase	Npepps	116100000	153800000	149100000	94210000	116170000	117380000	0.350442	2.12599	1.72772	0.100661	0.13166	0.123914	0.142052	4	2.40262	0.0966032	0.0407569	0.0617135	Not Significant	Not Significant	0.880547	0.99714
Q11136	Xaa-Pro dipeptidase	Pepd	45980000	49104000	32913000	10745000	13285000	11817000	1.82039	9.12816	8.22253	0.000799183	0.000124136	0.0192234	0.00393373	4	2.40262	0.0966032	0.0596561	0.0735207	Not Significant	Not Significant	3.9061	3.09735
Q148A4	Protein phosphatase 1 regulatory subunit 32	Ppp1r32	37855000	19442000	19593000	54808000	76588000	71544000	-1.46011	-4.15997	-4.59136	0.0141455	0.0031568	0.0485815	0.0180915	4	2.40262	0.0966032	0.184792	0.151699	Not Significant	Not Significant	2.50075	1.84938
Q148B6	Speriolin	Spatc1	3373100	0	0	6316400	0	0	-0.211749	-0.297364	-0.362637	0.780992	0.728548	0.44987	0.424145	4	2.40262	0.0966032	0.760605	0.511434	Not Significant	Not Significant	0.137542	0.107353
Q148V7	LisH domain and HEAT repeat-containing protein KIAA1468	Kiaa1468	0	8611000	7663700	0	11128000	10389000	0.0764362	0.121933	0.147192	0.908832	0.887507	0.485083	0.471043	4	2.40262	0.0966032	0.589447	0.404505	Not Significant	Not Significant	0.051828	0.0415163
Q149C2	TRAF3-interacting protein 1	Traf3ip1	6098400	0	0	10225000	0	0	-0.688871	-1.27753	-1.51844	0.270523	0.17663	0.236855	0.173021	4	2.40262	0.0966032	0.436136	0.308725	Not Significant	Not Significant	0.752935	0.567796
Q149S1	Tektin-4	Tekt4	99440000	53242000	71545000	154080000	162380000	122680000	-1.00617	-3.48893	-3.64673	0.0251473	0.00959378	0.0604195	0.0290896	4	2.40262	0.0966032	0.124752	0.114189	Not Significant	Not Significant	2.01801	1.59951
Q14BI7	Putative ATP-dependent RNA helicase TDRD9	Tdrd9	9431700	0	0	12215000	0	0	-0.137703	-0.428647	-0.462513	0.690255	0.659017	0.420913	0.400548	4	2.40262	0.0966032	0.154804	0.132964	Not Significant	Not Significant	0.181103	0.16099
Q14BX2	Serine protease 55	Prss55	0	0	7230300	0	18534000	9083600	-0.352692	-0.697358	-0.822287	0.523986	0.440456	0.356865	0.317216	4	2.40262	0.0966032	0.383681	0.275953	Not Significant	Not Significant	0.356097	0.28068
Q1HFZ0	tRNA (cytosine(34)-C(5))-methyltransferase	Nsun2	19812000	33009000	48023000	12355000	20971000	20928000	0.844678	1.88163	2.18048	0.13303	0.0691819	0.147381	0.0928629	4	2.40262	0.0966032	0.302277	0.225097	Not Significant	Not Significant	1.16001	0.876049
Q2MH31	Spermatid-specific manchette-related protein 1	Smrp1	15563000	11261000	0	29291000	31892000	18734000	-1.37564	-2.81991	-3.30886	0.0478324	0.0147536	0.0792414	0.0361098	4	2.40262	0.0966032	0.356966	0.259264	Not Significant	Not Significant	1.8311	1.32028
Q2NL51	Glycogen synthase kinase-3 alpha	Gsk3a	24286000	18518000	19233000	38032000	36132000	31970000	-0.781524	-5.46085	-4.06498	0.00546717	0.00576817	0.0346558	0.0229107	4	2.40262	0.0966032	0.0307224	0.0554446	Not Significant	Not Significant	2.23896	2.26224
Q2TBE6	Phosphatidylinositol 4-kinase type 2-alpha	Pi4k2a	27977000	0	23443000	6043200	9037400	0	1.03543	1.53011	1.85892	0.200733	0.109309	0.194666	0.1252	4	2.40262	0.0966032	0.686898	0.465387	Not Significant	Not Significant	0.961343	0.69738
Q2TPA8	Hydroxysteroid dehydrogenase-like protein 2	Hsdl2	34485000	35948000	36796000	43695000	47505000	45299000	-0.347866	-7.83973	-2.18282	0.00142971	0.0689525	0.0225207	0.0928629	4	2.40262	0.0966032	0.00295333	0.038096	Not Significant	Not Significant	1.16145	2.84475
Q2XU92	Long-chain-fatty-acid--CoA ligase ACSBG2	Acsbg2	4942600	0	0	6252100	0	0	-0.0886858	-0.166721	-0.19784	0.875678	0.849303	0.476536	0.459692	4	2.40262	0.0966032	0.424444	0.30142	Not Significant	Not Significant	0.0709371	0.0576554
Q2YDW2	Protein misato homolog 1	Msto1	41499000	23523000	36462000	45449000	66606000	57019000	-0.759267	-2.57348	-2.7091	0.0617511	0.0329625	0.0916725	0.05803	4	2.40262	0.0966032	0.130568	0.117823	Not Significant	Not Significant	1.48198	1.20936
Q32M07	Adenylate kinase 8	Ak8	0	0	10606000	0	30222000	25514000	-0.908546	-1.17514	-1.44086	0.305113	0.196681	0.256875	0.186164	4	2.40262	0.0966032	0.896608	0.596402	Not Significant	Not Significant	0.706238	0.515539
Q32MG2	Spermatid-associated protein	Spert	279420000	80615000	188990000	580930000	430290000	356760000	-1.46292	-2.57705	-3.08074	0.0615187	0.0199165	0.0914928	0.0422907	4	2.40262	0.0966032	0.483378	0.338239	Not Significant	Not Significant	1.70079	1.21099
Q3B7Z2	Oxysterol-binding protein 1	Osbp	26383000	27830000	23318000	19718000	24907000	25929000	0.142354	0.98517	0.737957	0.380315	0.486699	0.296818	0.334567	4	2.40262	0.0966032	0.0313191	0.0558173	Not Significant	Not Significant	0.31274	0.419856
Q3TC72	Fumarylacetoacetate hydrolase domain-containing protein 2A	Fahd2	74624000	49452000	56459000	93781000	103300000	89120000	-0.683647	-3.68029	-3.19709	0.0211986	0.0170742	0.0559669	0.0387259	4	2.40262	0.0966032	0.0517596	0.0685874	Not Significant	Not Significant	1.76766	1.67369
Q3TCH7	Cullin-4A	Cul4a	35471000	24935000	23372000	40917000	41943000	36495000	-0.533079	-2.70651	-2.423	0.053731	0.0491009	0.0844988	0.0744383	4	2.40262	0.0966032	0.0581909	0.0726053	Not Significant	Not Significant	1.30891	1.26978
Q3TCN2	Putative phospholipase B-like 2;Putative phospholipase B-like 2 28 kDa form;Putative phospholipase B-like 2 40 kDa form;Putative phospholipase B-like 2 15 kDa form	Plbd2	101170000	108930000	118720000	81026000	88722000	81693000	0.385214	4.8944	2.30056	0.00807643	0.0583544	0.0390375	0.0834586	4	2.40262	0.0966032	0.0092917	0.0420558	Not Significant	Not Significant	1.23393	2.09278
Q3TDN2	FAS-associated factor 2	Faf2	111290000	110630000	107760000	121810000	133580000	116820000	-0.172912	-2.93597	-1.06553	0.0425597	0.325161	0.0748047	0.259763	4	2.40262	0.0966032	0.00520281	0.0395013	Not Significant	Not Significant	0.487902	1.371
Q3TDQ1	Dolichyl-diphosphooligosaccharide--protein glycosyltransferase subunit STT3B	Stt3b	38026000	31751000	31249000	33930000	38888000	31981000	-0.0538344	-0.436337	-0.293354	0.685111	0.77853	0.419488	0.441165	4	2.40262	0.0966032	0.0228333	0.0505158	Not Significant	Not Significant	0.108725	0.164239
Q3TEA8	Heterochromatin protein 1-binding protein 3	Hp1bp3	64910000	79933000	138660000	41283000	38201000	33066000	1.26207	3.71332	4.06622	0.0205942	0.00575972	0.0556936	0.0229107	4	2.40262	0.0966032	0.173273	0.144503	Not Significant	Not Significant	2.2396	1.68625
Q3TGF2	Protein FAM107B	Fam107b	22783000	18652000	20612000	33960000	48988000	44612000	-1.02764	-5.73718	-4.88736	0.0045724	0.00228935	0.0325293	0.0158115	4	2.40262	0.0966032	0.0481258	0.0663172	Not Significant	Not Significant	2.64029	2.33986
Q3THE2	Myosin regulatory light chain 12B	Myl12b	131030000	273860000	274410000	75206000	90311000	100810000	1.28205	3.41155	3.8241	0.0269889	0.00770676	0.0615166	0.026444	4	2.40262	0.0966032	0.211834	0.168593	Not Significant	Not Significant	2.11313	1.56881
Q3THG9	Alanyl-tRNA editing protein Aarsd1	Aarsd1	0	62753000	27737000	0	21413000	27167000	0.541223	0.492153	0.612931	0.648399	0.56105	0.405933	0.362547	4	2.40262	0.0966032	1.81402	1.16955	Not Significant	Not Significant	0.250998	0.188158
Q3THK7	GMP synthase [glutamine-hydrolyzing]	Gmps	432570000	342120000	353940000	642670000	677330000	560690000	-0.740066	-5.55441	-3.94131	0.005142	0.00668595	0.0336718	0.0245019	4	2.40262	0.0966032	0.0266291	0.0528873	Not Significant	Not Significant	2.17484	2.28887
Q3THS6	S-adenosylmethionine synthase isoform type-2	Mat2a	115040000	120900000	119640000	97123000	104510000	99510000	0.24007	6.31915	1.51625	0.00320832	0.177171	0.0284036	0.173324	4	2.40262	0.0966032	0.00216496	0.0376034	Not Significant	Not Significant	0.751608	2.49372
Q3TIU4	2,5-phosphodiesterase 12	Pde12	12067000	0	0	10269000	0	0	-0.0229217	-0.0362752	-0.0438206	0.972801	0.966382	0.50163	0.49175	4	2.40262	0.0966032	0.598917	0.410421	Not Significant	Not Significant	0.014851	0.011976
Q3TIV5	Zinc finger CCCH domain-containing protein 15	Zc3h15	7054800	0	0	14463000	0	0	-0.318386	-1.17064	-1.20013	0.306726	0.272603	0.257837	0.231875	4	2.40262	0.0966032	0.110956	0.10557	Not Significant	Not Significant	0.564469	0.513249
Q3TIX9	U4/U6.U5 tri-snRNP-associated protein 2	Usp39	9593800	11178000	17308000	11859000	13088000	10425000	0.0660003	0.24247	0.248649	0.820341	0.811418	0.462009	0.45031	4	2.40262	0.0966032	0.111139	0.105684	Not Significant	Not Significant	0.0907555	0.0860056
Q3TJD7	PDZ and LIM domain protein 7	Pdlim7	0	62034000	22565000	0	8003700	12854000	1.45696	2.18293	2.64915	0.094435	0.0358093	0.119439	0.0620948	4	2.40262	0.0966032	0.668202	0.453707	Not Significant	Not Significant	1.446	1.02487
Q3TKT4	Transcription activator BRG1	Smarca4	5114800	0	0	4120900	0	0	0.294622	0.502214	0.602431	0.641904	0.567599	0.403712	0.365754	4	2.40262	0.0966032	0.516231	0.358764	Not Significant	Not Significant	0.245959	0.19253
Q3TPX4	Exocyst complex component 5	Exoc5	25141000	27431000	31374000	16002000	20395000	24983000	0.469335	2.25942	2.07572	0.0867357	0.0802927	0.114062	0.101736	4	2.40262	0.0966032	0.0647234	0.0766865	Not Significant	Not Significant	1.09532	1.0618
Q3TTE0	Disintegrin and metalloproteinase domain-containing protein 5	Adam5	18274000	7243000	16946000	67577000	66372000	22306000	-1.82638	-2.68463	-3.26289	0.0549635	0.0156638	0.0854404	0.0372274	4	2.40262	0.0966032	0.694232	0.469968	Not Significant	Not Significant	1.8051	1.25993
Q3TTP0	SHC SH2 domain-binding protein 1-like protein	Shcbp1l	584490000	240100000	347930000	874250000	700930000	639930000	-1.00187	-2.53323	-2.8697	0.0644426	0.026457	0.093887	0.0504815	4	2.40262	0.0966032	0.23462	0.182829	Not Significant	Not Significant	1.57746	1.19083
Q3TTY0	Phospholipase B1, membrane-associated;Phospholipase A2;Lysophospholipase	Plb1	9182900	5015700	6766200	7280800	24997000	8323800	-0.760425	-1.23151	-1.48458	0.285585	0.18514	0.245464	0.178953	4	2.40262	0.0966032	0.571912	0.39355	Not Significant	Not Significant	0.7325	0.544265
Q3TUH1	Phosphatidate cytidylyltransferase, mitochondrial	Tamm41	4512000	0	0	6226500	0	0	-0.0389667	-0.0652485	-0.0784077	0.951107	0.939897	0.496416	0.485527	4	2.40262	0.0966032	0.534981	0.370477	Not Significant	Not Significant	0.0269196	0.0217706
Q3TUU5	Testis-expressed sequence 30 protein	Tex30	54012000	38561000	32363000	61586000	76332000	68563000	-0.752518	-3.20855	-3.11042	0.0326338	0.0191459	0.0671443	0.0415333	4	2.40262	0.0966032	0.0825098	0.0877985	Not Significant	Not Significant	1.71792	1.48633
Q3TVA9	Coiled-coil domain-containing protein 136	Ccdc136	35102000	0	31082000	72533000	91403000	63102000	-2.20283	-2.12458	-2.64086	0.10082	0.0362224	0.123925	0.0626033	4	2.40262	0.0966032	1.61252	1.04366	Not Significant	Significant	1.44102	0.996452
Q3TW96	UDP-N-acetylhexosamine pyrophosphorylase-like protein 1	Uap1l1	143180000	135910000	163040000	29189000	31237000	31485000	2.26272	26.4882	13.3503	1.20732e-05	6.51527e-06	0.00661369	0.00116575	4	2.40262	0.0966032	0.0109457	0.0430892	Significant	Significant	5.18607	4.91818
Q3TWW8	Serine/arginine-rich splicing factor 6	Srsf6	112770000	118590000	168830000	108330000	145710000	120980000	0.0805452	0.363417	0.343898	0.734686	0.741938	0.435353	0.429773	4	2.40262	0.0966032	0.0736819	0.0822833	Not Significant	Not Significant	0.129633	0.133898
Q3TXS7	26S proteasome non-ATPase regulatory subunit 1	Psmd1	360390000	317440000	316770000	442950000	424800000	359170000	-0.299705	-2.69916	-1.67882	0.0541414	0.141071	0.0849141	0.14978	4	2.40262	0.0966032	0.0184937	0.0478047	Not Significant	Not Significant	0.850562	1.26647
Q3TYS2	Uncharacterized protein C17orf62 homolog	NA	0	7536300	0	0	8291900	0	-0.282793	-0.655968	-0.755045	0.54766	0.477069	0.366757	0.33062	4	2.40262	0.0966032	0.27878	0.210417	Not Significant	Not Significant	0.321418	0.261489
Q3TYX3	SET and MYND domain-containing protein 5	Smyd5	13796000	11433000	10380000	20651000	13461000	11029000	-0.30168	-1.03002	-1.08186	0.361204	0.318371	0.287737	0.256111	4	2.40262	0.0966032	0.128674	0.116639	Not Significant	Not Significant	0.497067	0.442247
Q3U0V1	Far upstream element-binding protein 2	Khsrp	229650000	199160000	246420000	199070000	219390000	218800000	0.0793659	0.782427	0.453739	0.47769	0.664993	0.337649	0.402213	4	2.40262	0.0966032	0.0154337	0.045893	Not Significant	Not Significant	0.177183	0.320854
Q3U0V2	Tumor necrosis factor receptor type 1-associated DEATH domain protein	Tradd	0	6742100	0	0	3694200	0	0.517274	1.54922	1.68881	0.196254	0.139097	0.191856	0.148382	4	2.40262	0.0966032	0.167226	0.140724	Not Significant	Not Significant	0.856682	0.707181
Q3U186	Probable arginine--tRNA ligase, mitochondrial	Rars2	0	4796500	0	0	5768800	4803300	0.40636	0.57351	0.699151	0.597003	0.509049	0.387332	0.343216	4	2.40262	0.0966032	0.753063	0.506723	Not Significant	Not Significant	0.293241	0.224023
Q3U1J4	DNA damage-binding protein 1	Ddb1	223150000	242660000	275990000	271340000	278920000	288120000	-0.181686	-1.96189	-1.05736	0.121291	0.328599	0.138214	0.261476	4	2.40262	0.0966032	0.0128642	0.0442877	Not Significant	Not Significant	0.483334	0.916171
Q3U2P1	Protein transport protein Sec24A	Sec24a	0	0	9070100	0	6750900	5751400	0.404604	1.82853	1.72908	0.141469	0.131406	0.153676	0.142052	4	2.40262	0.0966032	0.0734427	0.0821338	Not Significant	Not Significant	0.881384	0.849338
Q3U2V3	8-oxo-dGDP phosphatase NUDT18	Nudt18	0	5394900	4731400	0	18795000	19607000	-0.972746	-1.36184	-1.66113	0.244902	0.144632	0.222237	0.152184	4	2.40262	0.0966032	0.765315	0.514377	Not Significant	Not Significant	0.839736	0.611008
Q3U3T8	WD repeat-containing protein 62	Wdr62	87487000	41107000	44007000	160470000	137020000	123790000	-1.36806	-3.75174	-4.17764	0.019917	0.00505243	0.0551036	0.0214457	4	2.40262	0.0966032	0.199452	0.160857	Not Significant	Not Significant	2.2965	1.70078
Q3U4I7	Pyridine nucleotide-disulfide oxidoreductase domain-containing protein 2	Pyroxd2	9716100	12446000	10365000	10356000	11408000	0	0.176348	0.801527	0.756023	0.467737	0.476522	0.333917	0.330514	4	2.40262	0.0966032	0.07261	0.0816136	Not Significant	Not Significant	0.321917	0.329998
Q3U6K5	Spermatogenesis-associated protein 6	Spata6	12189000	5554500	12528000	36026000	31084000	15599000	-1.45473	-2.71778	-3.22747	0.0531084	0.0164067	0.084002	0.0380421	4	2.40262	0.0966032	0.429763	0.304743	Not Significant	Not Significant	1.78498	1.27484
Q3U7R1	Extended synaptotagmin-1	Esyt1	36573000	58571000	55216000	14300000	7821100	11404000	2.17835	6.56373	7.14394	0.00278717	0.000282407	0.0280757	0.00592736	4	2.40262	0.0966032	0.165213	0.139467	Significant	Significant	3.54912	2.55484
Q3U7U3	F-box only protein 7	Fbxo7	4518800	0	0	5685900	0	0	0.217613	0.43154	0.508651	0.688317	0.628047	0.420043	0.39041	4	2.40262	0.0966032	0.381435	0.27455	Not Significant	Not Significant	0.202008	0.162211
Q3U9G9	Lamin-B receptor	Lbr	10757000	0	0	9867600	0	0	0.400399	1.26767	1.36144	0.273687	0.219338	0.238735	0.199706	4	2.40262	0.0966032	0.149647	0.129742	Not Significant	Not Significant	0.658885	0.562746
Q3UA06	Pachytene checkpoint protein 2 homolog	Trip13	0	10406000	0	0	15003000	12757000	0.457924	1.08396	1.24326	0.339348	0.257362	0.276649	0.223139	4	2.40262	0.0966032	0.267701	0.203495	Not Significant	Not Significant	0.589455	0.469355
Q3UA37	Glutamine-rich protein 1	Qrich1	18316000	0	0	19474000	0	0	-0.534581	-0.662054	-0.813816	0.544133	0.444956	0.365886	0.319318	4	2.40262	0.0966032	0.977985	0.647241	Not Significant	Not Significant	0.351683	0.264295
Q3UBX0	Transmembrane protein 109	Tmem109	15353000	31858000	0	16905000	33981000	28156000	-0.842968	-1.0839	-1.32946	0.339373	0.229103	0.276649	0.205814	4	2.40262	0.0966032	0.907267	0.603061	Not Significant	Not Significant	0.639969	0.469322
Q3UDE2	Tubulin--tyrosine ligase-like protein 12	Ttll12	101510000	176040000	149340000	93033000	130890000	125590000	0.267745	0.9496	0.985357	0.396088	0.360209	0.303605	0.277987	4	2.40262	0.0966032	0.119248	0.110751	Not Significant	Not Significant	0.443446	0.402208
Q3UDK1	TRAF-type zinc finger domain-containing protein 1	Trafd1	19577000	0	0	21941000	0	0	-0.783695	-1.11851	-1.36244	0.325984	0.219038	0.268666	0.199706	4	2.40262	0.0966032	0.736389	0.496306	Not Significant	Not Significant	0.65948	0.486803
Q3UDW8	Heparan-alpha-glucosaminide N-acetyltransferase	Hgsnat	0	13812000	13435000	11646000	9744700	0	0.414795	0.912876	1.05991	0.412952	0.327524	0.310876	0.261144	4	2.40262	0.0966032	0.309696	0.229732	Not Significant	Not Significant	0.484758	0.3841
Q3UE37	Ubiquitin-conjugating enzyme E2 Z	Ube2z	13402000	13638000	18843000	9039900	14257000	16759000	0.224375	0.7218	0.771705	0.510357	0.467808	0.351222	0.326723	4	2.40262	0.0966032	0.144946	0.126805	Not Significant	Not Significant	0.329932	0.292126
Q3UEB3	Poly(U)-binding-splicing factor PUF60	Puf60	76076000	84699000	85838000	73205000	96789000	93637000	-0.0874871	-0.631533	-0.460097	0.561983	0.66066	0.373608	0.401028	4	2.40262	0.0966032	0.0287863	0.054235	Not Significant	Not Significant	0.180022	0.250277
Q3UFF7	Lysophospholipase-like protein 1	Lyplal1	0	7785700	8673400	0	7864100	9553300	0.234263	0.979531	0.957167	0.382779	0.373217	0.297708	0.283309	4	2.40262	0.0966032	0.0857948	0.0898507	Not Significant	Not Significant	0.428039	0.417052
Q9DA80	Radial spoke head protein 3 homolog B;Radial spoke head protein 3 homolog A	Rsph3b	0	7935900	7232100	0	20392000	19497000	-0.790574	-1.79753	-2.07605	0.14666	0.0802555	0.157016	0.101736	4	2.40262	0.0966032	0.290152	0.217522	Not Significant	Not Significant	1.09553	0.83369
Q3UFY7	7-methylguanosine phosphate-specific 5-nucleotidase	Nt5c3b	30847000	33833000	32291000	32913000	39325000	44036000	-0.252698	-1.97169	-1.36188	0.119937	0.219206	0.13745	0.199706	4	2.40262	0.0966032	0.0246386	0.0516437	Not Significant	Not Significant	0.659147	0.921048
Q3UGF1	WD repeat-containing protein 19	Wdr19	33277000	14102000	24875000	88474000	78640000	60631000	-1.72515	-4.33719	-4.9188	0.01228	0.00221413	0.0463929	0.015521	4	2.40262	0.0966032	0.237316	0.184513	Not Significant	Not Significant	2.6548	1.9108
Q3UGR5	Haloacid dehalogenase-like hydrolase domain-containing protein 2	Hdhd2	98425000	67074000	90756000	78552000	82965000	84254000	0.0419585	0.245207	0.203625	0.818363	0.844966	0.461528	0.459016	4	2.40262	0.0966032	0.0439203	0.0636899	Not Significant	Not Significant	0.0731609	0.0870542
Q3UGS4	Protein FAM195B	Mcrip1	0	14390000	23518000	0	27855000	37198000	-0.689706	-0.787193	-0.97175	0.475191	0.366443	0.33645	0.280805	4	2.40262	0.0966032	1.15148	0.755632	Not Significant	Not Significant	0.435994	0.323132
Q3UHD6	Sorting nexin-27	Snx27	58320000	59192000	59950000	65271000	75314000	67306000	-0.225648	-3.53664	-1.38067	0.0240862	0.213647	0.0590793	0.196458	4	2.40262	0.0966032	0.00610621	0.0400657	Not Significant	Not Significant	0.670304	1.61823
Q3UHX2	28 kDa heat- and acid-stable phosphoprotein	Pdap1	36490000	39965000	34614000	42359000	57013000	54744000	-0.463022	-3.1452	-2.38447	0.0346736	0.0518368	0.0684062	0.0767872	4	2.40262	0.0966032	0.0325085	0.0565604	Not Significant	Not Significant	1.28536	1.46
Q3UIU2	NADH dehydrogenase [ubiquinone] 1 beta subcomplex subunit 6	Ndufb6	0	9956800	17258000	16490000	12406000	9607500	-0.180944	-0.446948	-0.50862	0.678045	0.628068	0.416083	0.39041	4	2.40262	0.0966032	0.245848	0.189843	Not Significant	Not Significant	0.201993	0.168741
Q3UJB9	Enhancer of mRNA-decapping protein 4	Edc4	152410000	124920000	141600000	213680000	236330000	228560000	-0.699348	-7.43662	-4.05855	0.00174594	0.00581228	0.0233274	0.0229107	4	2.40262	0.0966032	0.0132656	0.0445385	Not Significant	Not Significant	2.23565	2.75797
Q3UJD6	Ubiquitin carboxyl-terminal hydrolase 19	Usp19	0	7431200	8674400	0	11735000	8548200	0.138905	0.340479	0.388025	0.750626	0.710573	0.440405	0.416985	4	2.40262	0.0966032	0.249659	0.192224	Not Significant	Not Significant	0.148392	0.124576
Q3UJP5	Protein C8orf37 homolog	NA	6165400	0	0	8352300	0	0	-0.210107	-0.707785	-0.746488	0.51814	0.481875	0.354352	0.332953	4	2.40262	0.0966032	0.132182	0.118831	Not Significant	Not Significant	0.317065	0.285553
Q3UJU9	Regulator of microtubule dynamics protein 3	Rmdn3	24444000	16281000	21977000	22528000	15390000	14515000	0.265802	1.00221	1.01847	0.372955	0.345387	0.293259	0.271097	4	2.40262	0.0966032	0.10551	0.102168	Not Significant	Not Significant	0.461694	0.428344
Q3UKC1	Tax1-binding protein 1 homolog	Tax1bp1	9485000	10795000	9024600	10435000	23690000	15692000	-0.689907	-1.97095	-2.17392	0.120039	0.0698299	0.137472	0.0931944	4	2.40262	0.0966032	0.18379	0.151073	Not Significant	Not Significant	1.15596	0.920676
Q3UKJ7	WD40 repeat-containing protein SMU1;WD40 repeat-containing protein SMU1, N-terminally processed	Smu1	50352000	40325000	36740000	61813000	43333000	51748000	-0.297935	-1.4883	-1.34315	0.210896	0.224877	0.200803	0.203375	4	2.40262	0.0966032	0.0601109	0.0738048	Not Significant	Not Significant	0.648055	0.675932
Q3UL36	Arginine and glutamate-rich protein 1	Arglu1	10279000	0	0	14980000	0	0	-0.136229	-0.386064	-0.42664	0.719104	0.683617	0.431217	0.407379	4	2.40262	0.0966032	0.186773	0.152936	Not Significant	Not Significant	0.165187	0.143208
Q3ULD5	Methylcrotonoyl-CoA carboxylase beta chain, mitochondrial	Mccc2	27173000	28173000	27149000	21777000	27435000	27936000	0.105479	0.901543	0.583131	0.418276	0.579753	0.31271	0.371218	4	2.40262	0.0966032	0.020533	0.0490788	Not Significant	Not Significant	0.236757	0.378537
Q3ULJ0	Glycerol-3-phosphate dehydrogenase 1-like protein	Gpd1l	39505000	53571000	67476000	35781000	35217000	39510000	0.506726	2.20692	2.12052	0.0919405	0.0753357	0.117766	0.0974797	4	2.40262	0.0966032	0.0790793	0.0856552	Not Significant	Not Significant	1.123	1.03649
Q3UM18	Large subunit GTPase 1 homolog	Lsg1	0	5407100	9296500	0	6355300	0	-0.539295	-1.39672	-1.57457	0.235011	0.163322	0.216489	0.163944	4	2.40262	0.0966032	0.223629	0.175962	Not Significant	Not Significant	0.786955	0.628911
Q3UM29	Conserved oligomeric Golgi complex subunit 7	Cog7	11641000	10766000	13289000	12108000	17393000	11430000	-0.177121	-0.846383	-0.780285	0.445004	0.463086	0.325381	0.325955	4	2.40262	0.0966032	0.0656897	0.0772902	Not Significant	Not Significant	0.334338	0.351636
Q3UM45	Protein phosphatase 1 regulatory subunit 7	Ppp1r7	196130000	177080000	181470000	227290000	304010000	288650000	-0.554011	-4.05456	-2.92676	0.0154176	0.0244876	0.0504727	0.0478858	4	2.40262	0.0966032	0.0280053	0.053747	Not Significant	Not Significant	1.61105	1.81198
Q3UMC0	Spermatogenesis-associated protein 5	Spata5	92915000	83576000	75107000	91453000	113640000	118880000	-0.360972	-2.46194	-1.86162	0.0695466	0.10889	0.0981894	0.124998	4	2.40262	0.0966032	0.0322467	0.0563968	Not Significant	Not Significant	0.963011	1.15772
Q3UMT1	Protein phosphatase 1 regulatory subunit 12C	Ppp1r12c	0	29824000	27237000	0	18910000	16988000	0.868208	1.02172	1.25935	0.364678	0.251867	0.289652	0.21967	4	2.40262	0.0966032	1.08312	0.712924	Not Significant	Not Significant	0.598829	0.438091
Q3UMU9	Hepatoma-derived growth factor-related protein 2	Hdgfl2	37471000	17293000	7977500	48602000	33643000	21393000	-0.919497	-1.26032	-1.53956	0.276065	0.17151	0.240106	0.169531	4	2.40262	0.0966032	0.798418	0.535058	Not Significant	Not Significant	0.76571	0.558988
Q3UMY5	Echinoderm microtubule-associated protein-like 4	Eml4	7364100	13349000	12343000	7688900	15044000	11901000	-0.0607048	-0.155207	-0.175431	0.884176	0.866159	0.477825	0.464884	4	2.40262	0.0966032	0.229465	0.179608	Not Significant	Not Significant	0.0624024	0.0534615
Q3UN02	Lysocardiolipin acyltransferase 1	Lclat1	10533000	0	8476000	10245000	5970600	7660400	0.299224	1.23057	1.21047	0.2859	0.268881	0.245607	0.229312	4	2.40262	0.0966032	0.0886893	0.091659	Not Significant	Not Significant	0.57044	0.543786
Q3UNZ8	Quinone oxidoreductase-like protein 2	NA	16855000	17316000	19592000	11295000	10997000	13642000	0.584899	4.93602	3.22272	0.00783904	0.0165092	0.0386866	0.0381674	4	2.40262	0.0966032	0.021062	0.0494093	Not Significant	Not Significant	1.78227	2.10574
Q3UPH1	Protein PRRC1	Prrc1	33803000	42209000	46407000	23947000	31978000	34046000	0.448211	2.16658	1.98657	0.0961771	0.091156	0.120287	0.109531	4	2.40262	0.0966032	0.0641957	0.0763568	Not Significant	Not Significant	1.04021	1.01693
Q3UPL0	Protein transport protein Sec31A	Sec31a	152060000	171000000	155810000	122260000	139470000	129750000	0.290928	3.86002	1.74751	0.0181469	0.128025	0.0532757	0.139756	4	2.40262	0.0966032	0.00852082	0.0415742	Not Significant	Not Significant	0.892706	1.7412
Q3UQ44	Ras GTPase-activating-like protein IQGAP2	Iqgap2	40446000	56955000	93413000	47322000	53019000	27698000	0.543547	1.19674	1.3894	0.297488	0.211107	0.252526	0.195292	4	2.40262	0.0966032	0.309433	0.229568	Not Significant	Not Significant	0.675497	0.526531
Q3UQ84	Threonine--tRNA ligase, mitochondrial	Tars2	0	8019700	4471400	0	10717000	11488000	-0.564265	-1.65277	-1.81187	0.173722	0.116862	0.17634	0.131065	4	2.40262	0.0966032	0.174838	0.14548	Not Significant	Not Significant	0.932326	0.760145
Q3UQN2	F-BAR domain only protein 2	Fcho2	0	6687600	9461900	0	7201000	6606200	-0.291269	-0.625638	-0.72914	0.565477	0.491718	0.375021	0.336559	4	2.40262	0.0966032	0.325112	0.239363	Not Significant	Not Significant	0.308284	0.247585
Q3URD3	Sarcolemmal membrane-associated protein	Slmap	134760000	167530000	138630000	127010000	150700000	128810000	0.114728	0.907839	0.620881	0.415312	0.556124	0.311938	0.361399	4	2.40262	0.0966032	0.0239561	0.0512173	Not Significant	Not Significant	0.254829	0.381626
Q3UTJ2	Sorbin and SH3 domain-containing protein 2	Sorbs2	0	66861000	21066000	0	0	10886000	1.29566	1.07305	1.33993	0.343672	0.225864	0.279183	0.203584	4	2.40262	0.0966032	2.18691	1.40251	Not Significant	Not Significant	0.646153	0.463856
Q3UUI3	Acyl-coenzyme A thioesterase THEM4	Them4	7722900	0	0	12909000	0	0	-0.808619	-2.00525	-2.28022	0.115422	0.0600583	0.134147	0.0849929	4	2.40262	0.0966032	0.243916	0.188636	Not Significant	Not Significant	1.22143	0.93771
Q3UUJ4	STE20-related kinase adapter protein alpha	Strada	0	0	3525300	0	7788400	0	-0.298832	-0.754109	-0.854603	0.492745	0.42359	0.343853	0.308646	4	2.40262	0.0966032	0.235547	0.183408	Not Significant	Not Significant	0.373054	0.307378
Q3UV70	[Pyruvate dehydrogenase [acetyl-transferring]]-phosphatase 1, mitochondrial	Pdp1	23688000	16984000	13746000	11417000	11372000	12376000	0.594377	2.5625	2.47272	0.0624724	0.0457905	0.0920398	0.0719876	4	2.40262	0.0966032	0.0807024	0.0866693	Not Significant	Not Significant	1.33922	1.20431
Q3UVG3	Protein FAM91A1	Fam91a1	3849000	0	5919100	5024500	0	0	-0.626388	-1.4536	-1.67302	0.219727	0.142229	0.206696	0.150481	4	2.40262	0.0966032	0.278542	0.210268	Not Significant	Not Significant	0.847012	0.658117
Q3UVK0	Endoplasmic reticulum metallopeptidase 1	Ermp1	0	9955600	0	0	14319000	11381000	-0.089441	-0.138792	-0.167948	0.896322	0.871805	0.481376	0.465922	4	2.40262	0.0966032	0.622924	0.425419	Not Significant	Not Significant	0.0595806	0.0475362
Q3UW53	Protein Niban	Fam129a	69005000	78303000	108740000	73271000	74258000	71659000	0.197214	1.00567	0.898354	0.371475	0.401516	0.292388	0.297429	4	2.40262	0.0966032	0.0576846	0.072289	Not Significant	Not Significant	0.396297	0.43007
Q3UX61	N-alpha-acetyltransferase 11	Naa11	22944000	31607000	19804000	26017000	30563000	24429000	-0.145228	-0.656736	-0.620847	0.547214	0.556144	0.366608	0.361399	4	2.40262	0.0966032	0.0733513	0.0820767	Not Significant	Not Significant	0.254813	0.261843
Q3UYV9	Nuclear cap-binding protein subunit 1	Ncbp1	95030000	74521000	63391000	109000000	135620000	115820000	-0.643753	-3.31809	-2.94806	0.029431	0.0237931	0.0639772	0.0470006	4	2.40262	0.0966032	0.0564616	0.071525	Not Significant	Not Significant	1.62355	1.53119
Q3V0F0	RIMS-binding protein 3	Rimbp3	10017000	0	0	18566000	0	0	-1.14138	-2.31506	-2.72046	0.0815782	0.0324509	0.109385	0.0576001	4	2.40262	0.0966032	0.364612	0.26404	Not Significant	Not Significant	1.48877	1.08843
Q3V0Q1	Dynein heavy chain 12, axonemal	Dnah12	9743000	2736200	8255700	39472000	46400000	31504000	-2.67811	-4.48271	-5.38698	0.010967	0.00136768	0.0441437	0.0124878	4	2.40262	0.0966032	0.535387	0.370731	Significant	Significant	2.86402	1.95991
Q3V0Q7	Transmembrane protease serine 12	Tmprss12	13022000	0	0	15836000	0	0	-0.322041	-1.75928	-1.51641	0.153346	0.177131	0.161544	0.173324	4	2.40262	0.0966032	0.0502625	0.0676521	Not Significant	Not Significant	0.751705	0.814327
Q3V129	Serine/threonine-protein kinase ULK4	Ulk4	2359800	0	0	3234800	0	0	0.557098	0.533239	0.662991	0.622119	0.530469	0.396889	0.351932	4	2.40262	0.0966032	1.63724	1.0591	Not Significant	Not Significant	0.27534	0.206127
Q3V132	ADP/ATP translocase 4;ADP/ATP translocase 4, N-terminally processed	Slc25a31	310590000	195260000	269850000	496900000	525750000	444580000	-0.942403	-4.4749	-4.13767	0.011033	0.00529445	0.0442038	0.0218767	4	2.40262	0.0966032	0.0665271	0.0778133	Not Significant	Not Significant	2.27618	1.9573
Q3V140	Acrosin-binding protein	Acrbp	230800000	99687000	221250000	444490000	386750000	354900000	-1.19439	-2.94797	-3.35524	0.0420541	0.0138933	0.0743935	0.0350775	4	2.40262	0.0966032	0.246227	0.19008	Not Significant	Not Significant	1.8572	1.37619
Q3V1L4	Cytosolic purine 5-nucleotidase	Nt5c2	108060000	84564000	89898000	152290000	138590000	119510000	-0.539489	-3.66595	-2.77861	0.0214676	0.0299592	0.0559669	0.0544853	4	2.40262	0.0966032	0.0324851	0.0565458	Not Significant	Not Significant	1.52347	1.66822
Q3V3Q7	Phosphofurin acidic cluster sorting protein 2	Pacs2	4074100	0	0	4273400	0	0	-0.225011	-0.528774	-0.607262	0.624943	0.56458	0.397801	0.364442	4	2.40262	0.0966032	0.271617	0.205942	Not Significant	Not Significant	0.248274	0.204159
Q3V3R1	Monofunctional C1-tetrahydrofolate synthase, mitochondrial	Mthfd1l	28806000	31173000	36176000	26369000	32342000	33632000	0.059871	0.41192	0.309729	0.701516	0.766602	0.425098	0.43732	4	2.40262	0.0966032	0.0316882	0.0560479	Not Significant	Not Significant	0.11543	0.153963
Q3V3R4	Integrin alpha-1	Itga1	16920000	57517000	52733000	5706700	5605500	13816000	2.28648	3.2082	3.91266	0.0326448	0.00692091	0.0671443	0.0246367	4	2.40262	0.0966032	0.76191	0.51225	Significant	Significant	2.15984	1.48619
Q45VK7	Cytoplasmic dynein 2 heavy chain 1	Dync2h1	112480000	81403000	88652000	196690000	217460000	206200000	-1.14722	-7.87262	-5.92947	0.00140717	0.000810277	0.0225059	0.00984595	4	2.40262	0.0966032	0.0318529	0.0561508	Not Significant	Not Significant	3.09137	2.85165
Q497K7	Transmembrane protein 247	Tmem247	19946000	0	0	39025000	37710000	25345000	-1.21402	-2.97315	-3.38889	0.0410163	0.0133031	0.0737391	0.034265	4	2.40262	0.0966032	0.250096	0.192497	Not Significant	Not Significant	1.87605	1.38704
Q4FK66	Pre-mRNA-splicing factor 38A	Prpf38a	3191900	0	0	4094400	0	0	-0.425173	-0.662873	-0.801799	0.543659	0.451395	0.365717	0.321438	4	2.40262	0.0966032	0.617107	0.421785	Not Significant	Not Significant	0.345443	0.264673
Q4KML4	Costars family protein ABRACL	Abracl	0	19167000	41978000	0	12233000	14059000	0.569501	0.708448	0.870627	0.517769	0.415404	0.354246	0.304742	4	2.40262	0.0966032	0.969314	0.641825	Not Significant	Not Significant	0.381529	0.285864
Q4KMM3	Oxidation resistance protein 1	Oxr1	15925000	0	0	12600000	0	0	0.0490217	0.0745327	0.0903436	0.944165	0.930775	0.494842	0.483254	4	2.40262	0.0966032	0.648895	0.441644	Not Significant	Not Significant	0.0311554	0.0249521
Q4QQM4	Tumor protein p53-inducible protein 11	Trp53i11	0	0	6897500	0	6987200	0	-0.170711	-0.892616	-0.787282	0.42251	0.459261	0.31447	0.324397	4	2.40262	0.0966032	0.0548636	0.0705266	Not Significant	Not Significant	0.33794	0.374163
Q4VA53	Sister chromatid cohesion protein PDS5 homolog B	Pds5b	0	4913600	10016000	0	4141000	0	0.28414	0.532677	0.632314	0.622474	0.549084	0.396962	0.358397	4	2.40262	0.0966032	0.426803	0.302894	Not Significant	Not Significant	0.260361	0.205879
Q4VA55	PWWP domain-containing protein MUM1L1	Mum1l1	0	7751600	19540000	0	7186600	7611100	0.635314	1.42915	1.65351	0.226169	0.146193	0.210847	0.153022	4	2.40262	0.0966032	0.296423	0.221439	Not Significant	Not Significant	0.835074	0.645566
Q4VAA2	Protein CDV3	Cdv3	49079000	42511000	46907000	68995000	93015000	81151000	-0.80394	-5.7929	-4.22542	0.00441432	0.00477909	0.0322063	0.0208746	4	2.40262	0.0966032	0.0288899	0.0542997	Not Significant	Not Significant	2.32065	2.35514
Q4VBE8	WD repeat-containing protein 18	Wdr18	8913400	4165900	0	5791000	0	0	0.0288208	0.0544217	0.0645451	0.959209	0.950505	0.498362	0.488127	4	2.40262	0.0966032	0.420689	0.299074	Not Significant	Not Significant	0.0220457	0.0180868
Q501J6	Probable ATP-dependent RNA helicase DDX17	Ddx17	146650000	119190000	165610000	149190000	147930000	124030000	0.0268918	0.164473	0.133022	0.877335	0.898259	0.476536	0.474722	4	2.40262	0.0966032	0.0400997	0.061303	Not Significant	Not Significant	0.0465985	0.0568344
Q505B7	Protein archease	Zbtb8os	0	12682000	0	0	12731000	0	0.539222	1.81018	1.91118	0.144516	0.101481	0.155874	0.118759	4	2.40262	0.0966032	0.133101	0.119405	Not Significant	Not Significant	0.993616	0.840083
Q505B8	Synaptonemal complex central element protein 2	Syce2	10360000	8154100	9157000	13279000	14756000	14087000	-0.611748	-5.61142	-3.44177	0.00495546	0.0124304	0.0333286	0.0331819	4	2.40262	0.0966032	0.0178275	0.0473885	Not Significant	Not Significant	1.90551	2.30492
Q505F5	Leucine-rich repeat-containing protein 47	Lrrc47	36707000	36765000	47760000	34764000	39084000	38110000	0.105283	0.772718	0.55671	0.482812	0.596635	0.339807	0.378727	4	2.40262	0.0966032	0.0278462	0.0536476	Not Significant	Not Significant	0.224291	0.316222
Q52KI8	Serine/arginine repetitive matrix protein 1	Srrm1	16787000	18713000	20211000	25737000	23989000	24058000	-0.408736	-4.8395	-2.41591	0.00840316	0.0495929	0.0397059	0.0747654	4	2.40262	0.0966032	0.0106998	0.0429355	Not Significant	Not Significant	1.30458	2.07556
Q562E2	BTB/POZ domain-containing protein KCTD19	Kctd19	0	6101300	6383800	0	10652000	10369000	-0.580254	-3.9237	-2.98331	0.017194	0.0226897	0.0522624	0.0457797	4	2.40262	0.0966032	0.0328047	0.0567455	Not Significant	Not Significant	1.64417	1.76462
Q569Z5	Probable ATP-dependent RNA helicase DDX46	Ddx46	44072000	33973000	29872000	59829000	49770000	36664000	-0.429147	-1.62572	-1.64934	0.179335	0.147053	0.180063	0.153601	4	2.40262	0.0966032	0.104522	0.101551	Not Significant	Not Significant	0.832525	0.746335
Q569Z6	Thyroid hormone receptor-associated protein 3	Thrap3	63690000	49500000	34441000	88524000	54545000	45769000	-0.341755	-0.890594	-1.00272	0.423474	0.352376	0.315045	0.274318	4	2.40262	0.0966032	0.220882	0.174246	Not Significant	Not Significant	0.452994	0.373173
Q571I9	Aldehyde dehydrogenase family 16 member A1	Aldh16a1	18777000	20450000	22822000	15734000	17387000	19360000	0.242173	2.03953	1.33361	0.111002	0.227814	0.131463	0.204998	4	2.40262	0.0966032	0.0211486	0.0494633	Not Significant	Not Significant	0.642419	0.954668
Q58A65	C-Jun-amino-terminal kinase-interacting protein 4	Spag9	18299000	12380000	15467000	21172000	17579000	16934000	-0.282321	-1.476	-1.30192	0.213984	0.237822	0.202803	0.211066	4	2.40262	0.0966032	0.054879	0.0705362	Not Significant	Not Significant	0.623748	0.669619
Q59J78	Mimitin, mitochondrial	Ndufaf2	24358000	15895000	25276000	35127000	34741000	31552000	-0.658738	-2.99043	-2.82218	0.040321	0.0282263	0.0732192	0.0525516	4	2.40262	0.0966032	0.0727863	0.0817237	Not Significant	Not Significant	1.54935	1.39447
Q5DU25	IQ motif and SEC7 domain-containing protein 2;IQ motif and SEC7 domain-containing protein 1;IQ motif and SEC7 domain-containing protein 3	Iqsec2	0	10993000	5420800	0	7355000	0	0.11009	0.255439	0.294005	0.810981	0.778054	0.4585	0.44105	4	2.40262	0.0966032	0.278619	0.210317	Not Significant	Not Significant	0.10899	0.0909891
Q5F201	Cilia- and flagella-associated protein 52	Cfap52	13386000	0	0	26751000	23894000	23071000	-1.5248	-3.15337	-3.69554	0.0344025	0.00902832	0.0681168	0.0280595	4	2.40262	0.0966032	0.350727	0.255365	Not Significant	Not Significant	2.04439	1.46341
Q5FWK3	Rho GTPase-activating protein 1	Arhgap1	121190000	177390000	153800000	85177000	91504000	95032000	0.719441	4.31104	3.52877	0.0125358	0.0111274	0.0470347	0.0311203	4	2.40262	0.0966032	0.0417752	0.0623497	Not Significant	Not Significant	1.9536	1.90185
Q5H8C4	Vacuolar protein sorting-associated protein 13A	Vps13a	105870000	66179000	71770000	187860000	187460000	156920000	-1.15269	-5.09603	-4.8653	0.00700194	0.00234382	0.0374819	0.0159019	4	2.40262	0.0966032	0.0767457	0.0841973	Not Significant	Not Significant	2.63008	2.15478
Q5M8N4	Epimerase family protein SDR39U1	Sdr39u1	0	0	12121000	0	14264000	12423000	-0.0292193	-0.0744464	-0.0842061	0.94423	0.935464	0.494842	0.48432	4	2.40262	0.0966032	0.23107	0.180611	Not Significant	Not Significant	0.0289728	0.0249224
Q5M8Q2	Histone H2A	H2al1a	15119000	0	0	24021000	0	0	0.120623	0.172476	0.210063	0.871438	0.840145	0.475517	0.457012	4	2.40262	0.0966032	0.73366	0.494601	Not Significant	Not Significant	0.0756456	0.0597633
Q5ND04	Heat shock factor protein 5	Hsf5	8536900	0	5704600	18871000	13790000	12353000	-1.15512	-4.45316	-4.48939	0.0112193	0.00353652	0.0445697	0.0187127	4	2.40262	0.0966032	0.100927	0.0993042	Not Significant	Not Significant	2.45142	1.95003
Q5PR69	Uncharacterized protein KIAA1211	Kiaa1211	7383200	0	0	14844000	15967000	11095000	-0.521025	-1.90632	-1.95763	0.129294	0.0949903	0.144719	0.11288	4	2.40262	0.0966032	0.112052	0.106254	Not Significant	Not Significant	1.02232	0.888423
Q5PSV9	Mediator of DNA damage checkpoint protein 1	Mdc1	68249000	32689000	46534000	123220000	82767000	61913000	-0.868188	-2.06439	-2.36586	0.107915	0.0532143	0.129167	0.078254	4	2.40262	0.0966032	0.2653	0.201996	Not Significant	Not Significant	1.27397	0.96692
Q5S003	Sperm-associated antigen 17	Spag17	11773000	0	0	18720000	0	0	-0.0871788	-0.178551	-0.209535	0.866969	0.84054	0.474344	0.457073	4	2.40262	0.0966032	0.357595	0.259656	Not Significant	Not Significant	0.0754417	0.0619964
Q5SNZ0	Girdin	Ccdc88a	0	19720000	0	6430400	0	0	0.477881	0.976737	1.14656	0.384005	0.292598	0.298238	0.242749	4	2.40262	0.0966032	0.359067	0.260576	Not Significant	Not Significant	0.533729	0.415663
Q5SRX1	TOM1-like protein 2	Tom1l2	0	31966000	26565000	0	27712000	23778000	0.0223653	0.0336796	0.0408561	0.974746	0.968655	0.501846	0.491908	4	2.40262	0.0966032	0.661464	0.449497	Not Significant	Not Significant	0.0138308	0.0111084
Q5SSL4	Active breakpoint cluster region-related protein;Breakpoint cluster region protein	Abr	15320000	0	0	8600300	0	0	1.06922	2.62898	2.99435	0.0582481	0.0223556	0.0883676	0.045332	4	2.40262	0.0966032	0.248111	0.191257	Not Significant	Not Significant	1.65061	1.23472
Q5SSW2	Proteasome activator complex subunit 4	Psme4	31395000	25514000	35549000	76552000	65865000	44422000	-0.991865	-3.6392	-3.73358	0.0219802	0.00861302	0.0565726	0.0276185	4	2.40262	0.0966032	0.111425	0.105863	Not Significant	Not Significant	2.06484	1.65797
Q5STT6	Protein FAM71B	Fam71b	0	0	4294300	0	15828000	10103000	-0.866108	-2.1565	-2.4503	0.0972698	0.0472532	0.121469	0.0728695	4	2.40262	0.0966032	0.241955	0.187411	Not Significant	Not Significant	1.32557	1.01202
Q5SUE7	Adenosine deaminase domain-containing protein 1	Adad1	17809000	0	7927700	53263000	24523000	12818000	-1.25009	-1.79113	-2.18113	0.147756	0.0691181	0.157673	0.0928629	4	2.40262	0.0966032	0.730663	0.492728	Not Significant	Not Significant	1.16041	0.830454
Q5SUF2	Luc7-like protein 3	Luc7l3	16426000	9326700	11144000	17629000	13458000	0	0.468951	0.535164	0.660636	0.620904	0.531884	0.396595	0.352292	4	2.40262	0.0966032	1.15179	0.755824	Not Significant	Not Significant	0.274183	0.206976
Q5SUR0	Phosphoribosylformylglycinamidine synthase	Pfas	109950000	111770000	122170000	101400000	114710000	125530000	0.0133966	0.132656	0.0766598	0.900871	0.941234	0.483149	0.485527	4	2.40262	0.0966032	0.0152977	0.0458081	Not Significant	Not Significant	0.0263024	0.0453372
Q5SVR0	TBC1 domain family member 9B	Tbc1d9b	0	60947000	58014000	0	0	39366000	0.425651	0.305042	0.382152	0.775548	0.714714	0.448463	0.419111	4	2.40262	0.0966032	2.92065	1.86091	Not Significant	Not Significant	0.145868	0.110391
Q5SW19	Clustered mitochondria protein homolog	Cluh	0	7436000	6033100	0	10342000	0	-0.286056	-0.835622	-0.916677	0.450376	0.39253	0.327308	0.292745	4	2.40262	0.0966032	0.175782	0.146069	Not Significant	Not Significant	0.406127	0.346425
Q5SW75	Protein phosphatase Slingshot homolog 2	Ssh2	31321000	34213000	0	48162000	0	0	0.955406	0.889607	1.10709	0.423945	0.308105	0.315253	0.250209	4	2.40262	0.0966032	1.7301	1.11712	Not Significant	Not Significant	0.511301	0.37269
Q5SWU9	Acetyl-CoA carboxylase 1;Biotin carboxylase	Acaca	78535000	114320000	100010000	71729000	94054000	74087000	0.281716	1.40297	1.26805	0.233281	0.248941	0.215257	0.21824	4	2.40262	0.0966032	0.0604812	0.0740362	Not Significant	Not Significant	0.603904	0.63212
Q5SYD0	Unconventional myosin-Id	Myo1d	12545000	19103000	20688000	14639000	13872000	12443000	0.324126	1.38367	1.34068	0.238664	0.225635	0.218872	0.203584	4	2.40262	0.0966032	0.0823106	0.087674	Not Significant	Not Significant	0.646593	0.622213
Q5U458	DnaJ homolog subfamily C member 11	Dnajc11	14344000	0	0	9037000	0	0	0.11825	0.30886	0.347579	0.772846	0.7393	0.447373	0.428552	4	2.40262	0.0966032	0.21987	0.173614	Not Significant	Not Significant	0.131179	0.111907
Q5U4D9	THO complex subunit 6 homolog	Thoc6	0	4873500	6165500	0	6739100	0	-0.0432237	-0.099095	-0.11429	0.92583	0.912508	0.490175	0.478498	4	2.40262	0.0966032	0.285386	0.214544	Not Significant	Not Significant	0.0397633	0.0334686
Q5U4F6	WD repeat-containing protein 34	Wdr34	0	5748200	0	0	10072000	7794800	-0.21696	-0.79783	-0.817889	0.469651	0.442788	0.334557	0.318612	4	2.40262	0.0966032	0.110925	0.105551	Not Significant	Not Significant	0.353804	0.328224
Q5XG69	Soluble lamin-associated protein of 75 kDa	Fam169a	17085000	10664000	13991000	14200000	12807000	11872000	0.0798638	0.378874	0.350473	0.724034	0.737229	0.43222	0.427658	4	2.40262	0.0966032	0.0666503	0.0778903	Not Significant	Not Significant	0.132398	0.140241
Q5XG73	Acyl-CoA-binding domain-containing protein 5	Acbd5	10927000	0	0	9450400	0	0	-0.384473	-0.840853	-0.977248	0.447758	0.363914	0.326227	0.279652	4	2.40262	0.0966032	0.313605	0.232174	Not Significant	Not Significant	0.439002	0.348957
Q5XJE5	RNA polymerase-associated protein LEO1	Leo1	0	4567900	0	0	0	6557800	-0.295453	-1.36794	-1.27962	0.243142	0.245092	0.221618	0.216094	4	2.40262	0.0966032	0.0699736	0.0799665	Not Significant	Not Significant	0.610671	0.614141
Q5XJY5	Coatomer subunit delta	Arcn1	120960000	147330000	144890000	130100000	126100000	117310000	0.141341	1.39592	0.808361	0.235233	0.447871	0.216572	0.320449	4	2.40262	0.0966032	0.0153784	0.0458584	Not Significant	Not Significant	0.348847	0.628501
Q60590	Alpha-1-acid glycoprotein 1	Orm1	32550000	32037000	58562000	0	0	12347000	1.74426	4.05049	4.66139	0.0154694	0.00292246	0.0505415	0.0171748	4	2.40262	0.0966032	0.278163	0.210032	Not Significant	Not Significant	2.53425	1.81053
Q60596	DNA repair protein XRCC1	Xrcc1	10915000	0	0	13365000	10118000	0	-0.182539	-0.605477	-0.641574	0.577536	0.543423	0.379672	0.357009	4	2.40262	0.0966032	0.136335	0.121426	Not Significant	Not Significant	0.264862	0.238421
Q60597	2-oxoglutarate dehydrogenase, mitochondrial	Ogdh	499280000	502470000	542390000	378770000	423990000	356780000	0.415943	5.04317	2.46743	0.00726587	0.0461312	0.0380026	0.0721807	4	2.40262	0.0966032	0.0102036	0.0426255	Not Significant	Not Significant	1.33601	2.13871
Q60598	Src substrate cortactin	Cttn	139430000	149300000	151950000	116570000	136200000	161250000	0.10171	0.72462	0.53255	0.508801	0.612315	0.350445	0.385019	4	2.40262	0.0966032	0.0295527	0.0547137	Not Significant	Not Significant	0.213025	0.293452
Q60605	Myosin light polypeptide 6	Myl6	314900000	579660000	550460000	175080000	207830000	253880000	1.14772	3.56873	3.85184	0.0234024	0.00745051	0.0583601	0.026032	4	2.40262	0.0966032	0.155146	0.133177	Not Significant	Not Significant	2.12781	1.63074
Q60631	Growth factor receptor-bound protein 2	Grb2	35480000	42209000	38647000	10906000	21157000	16028000	1.32269	4.61729	4.81583	0.00990124	0.00247138	0.042264	0.0160404	4	2.40262	0.0966032	0.123092	0.113152	Not Significant	Not Significant	2.60706	2.00431
Q60648	Ganglioside GM2 activator	Gm2a	238890000	260340000	256220000	128070000	159060000	153140000	0.784257	7.56628	4.46298	0.00163556	0.00364299	0.0225871	0.018753	4	2.40262	0.0966032	0.0161155	0.0463189	Not Significant	Not Significant	2.43854	2.78633
Q60649	Caseinolytic peptidase B protein homolog	Clpb	17870000	17235000	21530000	14916000	22539000	25236000	-0.118513	-0.471995	-0.470101	0.661527	0.653871	0.411643	0.39892	4	2.40262	0.0966032	0.0945683	0.0953319	Not Significant	Not Significant	0.184508	0.179453
Q60662	A-kinase anchor protein 4	Akap4	1081200000	318100000	652080000	1994700000	1227100000	939540000	-1.11938	-1.85713	-2.23367	0.136855	0.0641521	0.15017	0.0893776	4	2.40262	0.0966032	0.544958	0.376711	Not Significant	Not Significant	1.19279	0.863741
Q60668	Heterogeneous nuclear ribonucleoprotein D0	Hnrnpd	373780000	358460000	398490000	355670000	518420000	469400000	-0.232311	-1.37778	-1.13452	0.24033	0.297257	0.220032	0.244855	4	2.40262	0.0966032	0.0426452	0.0628932	Not Significant	Not Significant	0.526868	0.619192
Q60676	Serine/threonine-protein phosphatase 5	Ppp5c	171010000	113420000	154460000	263510000	276050000	242870000	-0.853328	-4.58491	-3.98699	0.0101457	0.00632936	0.0428266	0.0241001	4	2.40262	0.0966032	0.0519589	0.0687119	Not Significant	Not Significant	2.19864	1.99372
Q60692	Proteasome subunit beta type-6	Psmb6	168420000	134170000	139510000	223500000	229360000	223920000	-0.621459	-6.09433	-3.54895	0.00366651	0.010847	0.0296824	0.0307547	4	2.40262	0.0966032	0.0155979	0.0459956	Not Significant	Not Significant	1.96469	2.43575
Q60710	Deoxynucleoside triphosphate triphosphohydrolase SAMHD1	Samhd1	104130000	167330000	164960000	49788000	58803000	63637000	1.31581	5.31008	5.26206	0.00604589	0.00155089	0.0354849	0.0130544	4	2.40262	0.0966032	0.0921034	0.093792	Not Significant	Not Significant	2.80942	2.21854
Q60714	Long-chain fatty acid transport protein 1	Slc27a1	22050000	26741000	27668000	27119000	24151000	22163000	0.0561701	0.424498	0.299789	0.69304	0.773835	0.421672	0.439974	4	2.40262	0.0966032	0.0262634	0.0526588	Not Significant	Not Significant	0.111352	0.159242
Q60715	Prolyl 4-hydroxylase subunit alpha-1	P4ha1	0	38171000	26956000	0	16884000	18693000	0.614351	0.718961	0.88643	0.511926	0.407445	0.352007	0.30054	4	2.40262	0.0966032	1.09525	0.720501	Not Significant	Not Significant	0.389931	0.290793
Q60718	Disintegrin and metalloproteinase domain-containing protein 2	Adam2	123880000	55483000	80786000	220380000	213240000	192880000	-1.34298	-3.95327	-4.32845	0.016772	0.00424397	0.0517299	0.0198395	4	2.40262	0.0966032	0.173108	0.144399	Not Significant	Not Significant	2.37223	1.77541
Q60736	Zona pellucida sperm-binding protein 3 receptor	Zp3r	31336000	0	27623000	55260000	70624000	57262000	-1.20842	-5.90868	-5.38816	0.00410675	0.00136606	0.0308174	0.0124878	4	2.40262	0.0966032	0.0627401	0.0754474	Not Significant	Not Significant	2.86453	2.3865
Q60737	Casein kinase II subunit alpha	Csnk2a1	133510000	146370000	127170000	124900000	148430000	144150000	-0.0349337	-0.359217	-0.201435	0.737592	0.846607	0.435922	0.459136	4	2.40262	0.0966032	0.0141862	0.0451136	Not Significant	Not Significant	0.0723183	0.132184
Q60739	BAG family molecular chaperone regulator 1	Bag1	40302000	46790000	49975000	48263000	54639000	48303000	-0.144901	-1.32464	-0.814579	0.255902	0.444549	0.228435	0.319169	4	2.40262	0.0966032	0.017949	0.0474644	Not Significant	Not Significant	0.35208	0.591926
Q60749	KH domain-containing, RNA-binding, signal transduction-associated protein 1	Khdrbs1	158890000	68344000	149440000	224120000	117900000	99195000	-0.230564	-0.434568	-0.51552	0.686292	0.623503	0.419896	0.389224	4	2.40262	0.0966032	0.422241	0.300044	Not Significant	Not Significant	0.205161	0.163491
Q60770	Syntaxin-binding protein 3	Stxbp3	0	15368000	21152000	0	10711000	10953000	0.994519	1.66006	1.99547	0.172241	0.0900095	0.175351	0.10872	4	2.40262	0.0966032	0.538359	0.372588	Not Significant	Not Significant	1.04571	0.763864
Q60780	Growth arrest-specific protein 7	Gas7	13032000	19224000	17333000	9808100	13444000	12586000	0.462554	2.12656	1.9956	0.100596	0.089992	0.123914	0.10872	4	2.40262	0.0966032	0.0709675	0.0805874	Not Significant	Not Significant	1.0458	0.997418
Q60809	CCR4-NOT transcription complex subunit 7	Cnot7	0	3152000	3592300	0	4272900	0	-0.619893	-2.46717	-2.45789	0.0691567	0.0467525	0.0978912	0.0725125	4	2.40262	0.0966032	0.094695	0.0954111	Not Significant	Not Significant	1.3302	1.16017
Q60847	Collagen alpha-1(XII) chain	Col12a1	116760000	1543600000	1805800000	116030000	19653000	147950000	3.30464	2.097	2.63264	0.104005	0.0366379	0.125955	0.062991	4	2.40262	0.0966032	3.72513	2.36351	Not Significant	Significant	1.43607	0.982946
Q60854	Serpin B6	Serpinb6	475840000	562560000	562340000	266740000	280600000	396540000	0.780837	3.96547	3.54961	0.0166014	0.0108381	0.0515741	0.0307547	4	2.40262	0.0966032	0.0581597	0.0725858	Not Significant	Not Significant	1.96505	1.77985
Q60864	Stress-induced-phosphoprotein 1	Stip1	750650000	602800000	788620000	971310000	963830000	955870000	-0.442125	-3.70523	-2.43151	0.0207404	0.0485167	0.0556936	0.0740408	4	2.40262	0.0966032	0.0213576	0.0495939	Not Significant	Not Significant	1.31411	1.68318
Q60865	Caprin-1	Caprin1	86741000	90451000	101810000	88383000	79526000	87021000	0.128366	1.52956	0.759478	0.200863	0.474593	0.194666	0.32961	4	2.40262	0.0966032	0.0105648	0.0428512	Not Significant	Not Significant	0.323679	0.6971
Q60870	Receptor expression-enhancing protein 5	Reep5	18081000	38221000	60463000	43764000	36782000	37525000	-0.177235	-0.345014	-0.407645	0.747462	0.696817	0.439647	0.41281	4	2.40262	0.0966032	0.395836	0.283547	Not Significant	Not Significant	0.156881	0.126411
Q60875	Rho guanine nucleotide exchange factor 2	Arhgef2	8940100	0	6341000	11972000	11920000	0	-0.534417	-2.19105	-2.15789	0.0935826	0.0714385	0.119068	0.0946342	4	2.40262	0.0966032	0.0892378	0.0920017	Not Significant	Not Significant	1.14607	1.02881
Q60876	Eukaryotic translation initiation factor 4E-binding protein 1	Eif4ebp1	4911500	0	0	3937500	0	0	0.308038	0.716399	0.824231	0.513346	0.439428	0.352051	0.316758	4	2.40262	0.0966032	0.277325	0.209508	Not Significant	Not Significant	0.357112	0.28959
Q60902	Epidermal growth factor receptor substrate 15-like 1	Eps15l1	12279000	17959000	18007000	10842000	12424000	13026000	0.392768	1.96471	1.77191	0.1209	0.123676	0.138168	0.135971	4	2.40262	0.0966032	0.0599467	0.0737023	Not Significant	Not Significant	0.907713	0.917574
Q60930	Voltage-dependent anion-selective channel protein 2	Vdac2	725470000	574310000	597830000	868230000	1066500000	711920000	-0.468041	-2.36501	-2.1223	0.0772401	0.0751452	0.105604	0.0973891	4	2.40262	0.0966032	0.0587482	0.0729535	Not Significant	Not Significant	1.1241	1.11216
Q60931	Voltage-dependent anion-selective channel protein 3	Vdac3	520900000	357120000	403020000	685150000	558300000	399440000	-0.342391	-1.23185	-1.2722	0.28547	0.247553	0.245464	0.217403	4	2.40262	0.0966032	0.115883	0.108648	Not Significant	Not Significant	0.606333	0.544439
Q60932	Voltage-dependent anion-selective channel protein 1	Vdac1	433240000	475460000	505460000	250640000	246250000	188690000	1.05344	7.14553	5.42221	0.00202924	0.00132051	0.0247025	0.0124878	4	2.40262	0.0966032	0.032602	0.0566188	Not Significant	Not Significant	2.87926	2.69267
Q60949	TBC1 domain family member 1	Tbc1d1	0	3216500	0	0	3797500	0	-0.938596	-1.1997	-1.47202	0.296455	0.188389	0.251779	0.181442	4	2.40262	0.0966032	0.918124	0.609844	Not Significant	Not Significant	0.724946	0.528042
Q60967	Bifunctional 3-phosphoadenosine 5-phosphosulfate synthase 1;Sulfate adenylyltransferase;Adenylyl-sulfate kinase	Papss1	0	11670000	13621000	0	5332500	6947000	0.697457	1.61248	1.85709	0.182152	0.109594	0.182195	0.125308	4	2.40262	0.0966032	0.280632	0.211574	Not Significant	Not Significant	0.960212	0.739567
Q60972	Histone-binding protein RBBP4	Rbbp4	358880000	382870000	428750000	361180000	429390000	415290000	-0.0428776	-0.400411	-0.242238	0.709318	0.81617	0.427933	0.450655	4	2.40262	0.0966032	0.0172005	0.0469968	Not Significant	Not Significant	0.0882194	0.149159
Q60973	Histone-binding protein RBBP7	Rbbp7	84616000	96264000	26686000	60274000	61778000	47432000	0.0998401	0.166166	0.199796	0.876088	0.847836	0.476536	0.45934	4	2.40262	0.0966032	0.541526	0.374566	Not Significant	Not Significant	0.0716881	0.0574525
Q60996	Serine/threonine-protein phosphatase 2A 56 kDa regulatory subunit gamma isoform	Ppp2r5c	13638000	11391000	26144000	23098000	21386000	17315000	-0.35815	-0.931054	-1.0488	0.40453	0.332237	0.306643	0.263852	4	2.40262	0.0966032	0.221959	0.174918	Not Significant	Not Significant	0.478552	0.393049
Q61001	Laminin subunit alpha-5	Lama5	0	14489000	73701000	7901200	0	0	1.31478	1.25239	1.55739	0.278654	0.167292	0.241147	0.166482	4	2.40262	0.0966032	1.65316	1.06905	Not Significant	Not Significant	0.776524	0.554935
Q61009	Scavenger receptor class B member 1	Scarb1	20741000	20042000	52839000	28203000	19825000	17483000	0.389331	0.77471	0.912728	0.481758	0.394454	0.339211	0.293559	4	2.40262	0.0966032	0.378836	0.272927	Not Significant	Not Significant	0.404004	0.317171
Q61024	Asparagine synthetase [glutamine-hydrolyzing]	Asns	134730000	99071000	90751000	250960000	237010000	218830000	-1.14187	-6.27071	-5.38984	0.00330082	0.00136377	0.0284036	0.0124878	4	2.40262	0.0966032	0.0497388	0.0673249	Not Significant	Not Significant	2.86526	2.48138
Q61025	Intraflagellar transport protein 20 homolog	Ift20	0	4718500	4016500	0	17270000	19901000	-1.15722	-1.73695	-2.10762	0.157398	0.0767304	0.164632	0.098544	4	2.40262	0.0966032	0.665805	0.452209	Not Significant	Not Significant	1.11503	0.803002
Q61029	Lamina-associated polypeptide 2, isoforms beta/delta/epsilon/gamma	Tmpo	77995000	102370000	122390000	52222000	62293000	76788000	0.655969	2.64384	2.62123	0.0573498	0.0372224	0.0875914	0.0633845	4	2.40262	0.0966032	0.0923398	0.0939396	Not Significant	Not Significant	1.4292	1.24147
Q61033	Lamina-associated polypeptide 2, isoforms alpha/zeta	Tmpo	0	7766900	7416600	0	7649700	0	0.00322082	0.0147203	0.0138504	0.98896	0.989371	0.505679	0.497186	4	2.40262	0.0966032	0.0718113	0.0811146	Not Significant	Not Significant	0.00464086	0.00482114
Q61035	Histidine--tRNA ligase, cytoplasmic	Hars	56812000	50096000	51543000	44538000	45618000	43098000	0.248136	4.14482	1.52699	0.0143203	0.174541	0.0485815	0.171927	4	2.40262	0.0966032	0.00537598	0.0396095	Not Significant	Not Significant	0.758101	1.84405
Q61074	Protein phosphatase 1G	Ppm1g	127230000	121030000	107160000	143860000	143310000	146370000	-0.290285	-3.91512	-1.74725	0.0173188	0.12807	0.0522624	0.139756	4	2.40262	0.0966032	0.00824611	0.0414026	Not Significant	Not Significant	0.892551	1.76148
Q61081	Hsp90 co-chaperone Cdc37;Hsp90 co-chaperone Cdc37, N-terminally processed	Cdc37	114750000	114280000	111720000	118350000	129030000	123310000	-0.1207	-3.18084	-0.762359	0.0335081	0.472988	0.0678107	0.328982	4	2.40262	0.0966032	0.00215986	0.0376002	Not Significant	Not Significant	0.32515	1.47485
Q61112	45 kDa calcium-binding protein	Sdf4	83256000	82024000	83606000	116340000	122400000	109210000	-0.481878	-9.9746	-3.01025	0.000567564	0.0218837	0.0186422	0.0445989	4	2.40262	0.0966032	0.00350085	0.038438	Not Significant	Not Significant	1.65988	3.24599
Q61129	Complement factor I;Complement factor I heavy chain;Complement factor I light chain	Cfi	45423000	137400000	86455000	18968000	22263000	39984000	1.66601	2.93916	3.51306	0.0424248	0.0113512	0.0746474	0.0314128	4	2.40262	0.0966032	0.481952	0.337348	Not Significant	Not Significant	1.94496	1.37238
Q61133	Glutathione S-transferase theta-2	Gstt2	29260000	37297000	39428000	38541000	51891000	54799000	-0.449606	-2.18478	-1.99825	0.0942394	0.0896531	0.119439	0.108614	4	2.40262	0.0966032	0.0635241	0.0759372	Not Significant	Not Significant	1.04743	1.02577
Q61147	Ceruloplasmin	Cp	489180000	1457200000	1195300000	162160000	164010000	328240000	2.20295	3.73551	4.48329	0.0201998	0.00356079	0.055235	0.0187449	4	2.40262	0.0966032	0.521675	0.362164	Significant	Significant	2.44845	1.69465
Q61166	Microtubule-associated protein RP/EB family member 1	Mapre1	232290000	248490000	199440000	227940000	237000000	203470000	0.0222375	0.19383	0.12356	0.855755	0.905452	0.471294	0.475724	4	2.40262	0.0966032	0.0197434	0.0485854	Not Significant	Not Significant	0.0431345	0.0676508
Q61171	Peroxiredoxin-2	Prdx2	814730000	1047000000	1195700000	723190000	845660000	973420000	0.258927	1.26857	1.15571	0.273397	0.289099	0.238608	0.240217	4	2.40262	0.0966032	0.0624911	0.0752919	Not Significant	Not Significant	0.538953	0.563207
Q61183	Poly(A) polymerase alpha;Poly(A) polymerase beta	Papola	12178000	13831000	13423000	16229000	18146000	20046000	-0.46155	-4.43719	-2.62452	0.0113586	0.0370525	0.0445697	0.0632998	4	2.40262	0.0966032	0.0162298	0.0463904	Not Significant	Not Significant	1.43118	1.94467
Q61187	Tumor susceptibility gene 101 protein	Tsg101	23108000	19953000	22069000	19323000	25874000	21500000	-0.0263798	-0.191128	-0.138902	0.857734	0.893795	0.471777	0.472672	4	2.40262	0.0966032	0.028575	0.0541029	Not Significant	Not Significant	0.0487622	0.0666472
Q61189	Methylosome subunit pICln	Clns1a	19413000	23534000	0	26288000	24870000	26140000	-0.592685	-1.77292	-1.93327	0.150925	0.0983415	0.159607	0.11584	4	2.40262	0.0966032	0.167634	0.140979	Not Significant	Not Significant	1.00726	0.821239
Q61205	Platelet-activating factor acetylhydrolase IB subunit gamma	Pafah1b3	70235000	64212000	38988000	164860000	110800000	160000000	-1.35166	-4.19641	-4.53121	0.0137354	0.00337494	0.0485815	0.0183495	4	2.40262	0.0966032	0.155623	0.133475	Not Significant	Not Significant	2.47173	1.86216
Q61206	Platelet-activating factor acetylhydrolase IB subunit beta	Pafah1b2	252170000	154390000	312070000	249240000	243030000	298030000	-0.190427	-0.605416	-0.64944	0.577573	0.538642	0.379672	0.355457	4	2.40262	0.0966032	0.148403	0.128965	Not Significant	Not Significant	0.2687	0.238393
Q61207	Prosaposin	Psap	812210000	613900000	418370000	63807000	103720000	82612000	2.85858	8.32354	9.13822	0.00113826	6.61726e-05	0.0222693	0.00314539	4	2.40262	0.0966032	0.176919	0.14678	Significant	Significant	4.17932	2.94376
Q61233	Plastin-2	Lcp1	1251700000	1215400000	1006900000	116710000	75356000	141290000	3.42255	11.9729	12.4793	0.000278881	9.89508e-06	0.0186422	0.00116575	4	2.40262	0.0966032	0.122572	0.112827	Significant	Significant	5.00458	3.55458
Q61235	Beta-2-syntrophin	Sntb2	25460000	39249000	29857000	21145000	28459000	16262000	0.536084	1.81088	1.90829	0.144399	0.101899	0.155874	0.119114	4	2.40262	0.0966032	0.131455	0.118377	Not Significant	Not Significant	0.991831	0.840434
Q61239	Protein farnesyltransferase/geranylgeranyltransferase type-1 subunit alpha	Fnta	0	34541000	35472000	0	28756000	24216000	0.195158	0.19724	0.244754	0.853257	0.814304	0.470655	0.45031	4	2.40262	0.0966032	1.4685	0.953689	Not Significant	Not Significant	0.0892135	0.0689204
Q61247	Alpha-2-antiplasmin	Serpinf2	106520000	302360000	222980000	40284000	49637000	104350000	1.7017	2.78512	3.35415	0.0495584	0.0139127	0.0807976	0.0350775	4	2.40262	0.0966032	0.559977	0.386094	Not Significant	Not Significant	1.85659	1.30488
Q61263	Sterol O-acyltransferase 1	Soat1	67872000	76487000	123810000	29670000	26410000	20275000	1.77943	5.72323	6.11927	0.00461304	0.000680209	0.0325367	0.00923786	4	2.40262	0.0966032	0.145001	0.12684	Not Significant	Not Significant	3.16736	2.33601
Q61292	Laminin subunit beta-2	Lamb2	97382000	120160000	251080000	54708000	20528000	18470000	2.38203	3.67394	4.448	0.0213172	0.00370497	0.0559669	0.0188292	4	2.40262	0.0966032	0.630553	0.430185	Significant	Significant	2.43122	1.67127
Q61316	Heat shock 70 kDa protein 4	Hspa4	876880000	830470000	751410000	1125800000	1193200000	1187300000	-0.514449	-7.29197	-3.11491	0.00188015	0.0190321	0.0237679	0.0413642	4	2.40262	0.0966032	0.00746597	0.0409152	Not Significant	Not Significant	1.72051	2.72581
Q61334	B-cell receptor-associated protein 29	Bcap29	59634000	44870000	41284000	97221000	90414000	63390000	-0.7782	-3.1219	-3.10075	0.0354616	0.0193933	0.069218	0.0416853	4	2.40262	0.0966032	0.0932045	0.0944799	Not Significant	Not Significant	1.71235	1.45024
Q61335	B-cell receptor-associated protein 31	Bcap31	99790000	104740000	85395000	73858000	74122000	49330000	0.574889	2.68312	2.50075	0.0550496	0.0440277	0.0854404	0.070172	4	2.40262	0.0966032	0.0688616	0.0792718	Not Significant	Not Significant	1.35627	1.25925
Q61371	Intraflagellar transport protein 88 homolog	Ift88	12909000	10642000	13088000	21949000	34553000	26391000	-1.15887	-5.43782	-5.05574	0.00555105	0.00191733	0.034819	0.0146856	4	2.40262	0.0966032	0.0681262	0.0788124	Not Significant	Not Significant	2.7173	2.25562
Q61387	Cytochrome c oxidase subunit 7A-related protein, mitochondrial	Cox7a2l	16122000	0	0	12934000	0	0	0.624228	0.787483	0.966979	0.47504	0.368649	0.33645	0.281796	4	2.40262	0.0966032	0.942531	0.625092	Not Significant	Not Significant	0.433387	0.32327
Q61390	T-complex protein 1 subunit zeta-2	Cct6b	164400000	46318000	76996000	238330000	279310000	242530000	-1.59443	-2.97514	-3.5336	0.0409355	0.0110597	0.0737391	0.0310849	4	2.40262	0.0966032	0.430811	0.305398	Not Significant	Not Significant	1.95626	1.3879
Q61391	Neprilysin	Mme	0	39050000	27809000	0	23112000	28445000	0.233091	0.326238	0.397944	0.7606	0.703603	0.44325	0.414953	4	2.40262	0.0966032	0.76573	0.514636	Not Significant	Not Significant	0.152672	0.118844
Q61398	Procollagen C-endopeptidase enhancer 1	Pcolce	0	35612000	19850000	0	9284700	10872000	1.13595	3.33738	3.65589	0.0289062	0.00948474	0.063419	0.0288673	4	2.40262	0.0966032	0.173781	0.14482	Not Significant	Not Significant	2.02297	1.53901
Q61425	Hydroxyacyl-coenzyme A dehydrogenase, mitochondrial	Hadh	700330000	665180000	819770000	634380000	601700000	572090000	0.268788	2.67769	1.54003	0.0553614	0.171397	0.0856691	0.169522	4	2.40262	0.0966032	0.0151144	0.0456935	Not Significant	Not Significant	0.765997	1.25679
Q61464	Zinc finger protein 638	Znf638	20785000	0	0	20890000	0	0	-0.436019	-0.447328	-0.554765	0.677793	0.597889	0.416083	0.379246	4	2.40262	0.0966032	1.42512	0.926585	Not Significant	Not Significant	0.223379	0.168903
Q61474	RNA-binding protein Musashi homolog 1	Msi1	6955100	0	0	6304400	0	0	0.204427	0.627999	0.680035	0.564076	0.520302	0.374509	0.348044	4	2.40262	0.0966032	0.158945	0.135551	Not Significant	Not Significant	0.283745	0.248662
Q61496	Probable ATP-dependent RNA helicase DDX4	Ddx4	482140000	306080000	331100000	699070000	787660000	715840000	-1.00401	-4.80349	-4.42586	0.00862616	0.00379874	0.0402732	0.0189929	4	2.40262	0.0966032	0.0655316	0.0771914	Not Significant	Not Significant	2.42036	2.06418
Q61503	5-nucleotidase	Nt5e	35510000	75917000	44697000	44804000	58767000	64026000	-0.161488	-0.448884	-0.498306	0.676761	0.634923	0.41587	0.39295	4	2.40262	0.0966032	0.194136	0.157536	Not Significant	Not Significant	0.197279	0.169565
Q61508	Extracellular matrix protein 1	Ecm1	0	8758000	6914700	0	0	5517000	-0.502428	-1.03654	-1.21517	0.358499	0.267203	0.286275	0.228381	4	2.40262	0.0966032	0.352426	0.256427	Not Significant	Not Significant	0.573159	0.445513
Q61510	E3 ubiquitin/ISG15 ligase TRIM25	Trim25	0	18789000	13451000	0	10651000	10286000	0.0351378	0.0490221	0.0598105	0.963252	0.95413	0.498583	0.488722	4	2.40262	0.0966032	0.770648	0.517709	Not Significant	Not Significant	0.0203924	0.0162602
Q61543	Golgi apparatus protein 1	Glg1	40897000	54753000	61721000	32855000	33721000	28771000	0.70544	3.71183	3.26324	0.0206211	0.0156567	0.0556936	0.0372274	4	2.40262	0.0966032	0.0541796	0.0700993	Not Significant	Not Significant	1.8053	1.68569
Q61545	RNA-binding protein EWS	Ewsr1	57541000	0	0	78523000	0	0	-0.509825	-0.342243	-0.42927	0.749395	0.681799	0.440154	0.407046	4	2.40262	0.0966032	3.32863	2.1158	Not Significant	Not Significant	0.166344	0.125289
Q61576	Peptidyl-prolyl cis-trans isomerase FKBP10	Fkbp10	0	15767000	16439000	0	0	11676000	0.116958	0.411376	0.428023	0.701884	0.68266	0.425165	0.407253	4	2.40262	0.0966032	0.121248	0.112	Not Significant	Not Significant	0.165795	0.153735
Q61578	NADPH:adrenodoxin oxidoreductase, mitochondrial	Fdxr	362860000	400470000	736750000	160000000	188970000	186920000	1.41454	4.30216	4.67105	0.012624	0.00289168	0.0472578	0.0171278	4	2.40262	0.0966032	0.162162	0.137561	Not Significant	Not Significant	2.53885	1.8988
Q61581	Insulin-like growth factor-binding protein 7	Igfbp7	0	10164000	0	0	3124300	0	1.20764	2.52775	2.95724	0.0648194	0.0235002	0.0942689	0.0466813	4	2.40262	0.0966032	0.34237	0.250145	Not Significant	Not Significant	1.62893	1.18829
Q61584	Fragile X mental retardation syndrome-related protein 1	Fxr1	311420000	186600000	243030000	499180000	472230000	419490000	-0.935914	-4.14468	-3.95414	0.0143219	0.00658364	0.0485815	0.0242952	4	2.40262	0.0966032	0.0764856	0.0840349	Not Significant	Not Significant	2.18153	1.844
Q61595	Kinectin	Ktn1	0	7415400	7215100	0	5900100	0	-0.110278	-0.37962	-0.397703	0.723522	0.703772	0.43222	0.414953	4	2.40262	0.0966032	0.126581	0.115332	Not Significant	Not Significant	0.152568	0.140548
Q61598	Rab GDP dissociation inhibitor beta	Gdi2	1007600000	1254800000	1027200000	940300000	817790000	863590000	0.322561	2.75835	1.78348	0.050936	0.121665	0.0824709	0.134216	4	2.40262	0.0966032	0.0205125	0.0490659	Not Significant	Not Significant	0.914835	1.29298
Q61599	Rho GDP-dissociation inhibitor 2	Arhgdib	171160000	298030000	171650000	51986000	44297000	72703000	1.9029	5.60836	6.13873	0.00496525	0.00066827	0.0333286	0.00915262	4	2.40262	0.0966032	0.172684	0.144135	Not Significant	Not Significant	3.17505	2.30406
Q61655	ATP-dependent RNA helicase DDX19A	Ddx19a	29369000	30650000	26901000	33218000	34575000	29317000	-0.15853	-1.74997	-0.926235	0.155021	0.387904	0.162995	0.290502	4	2.40262	0.0966032	0.0123099	0.0439414	Not Significant	Not Significant	0.411275	0.809609
Q61656	Probable ATP-dependent RNA helicase DDX5	Ddx5	673730000	433480000	728500000	693480000	738700000	544710000	-0.130422	-0.485074	-0.495322	0.652992	0.636914	0.408257	0.393176	4	2.40262	0.0966032	0.108437	0.103996	Not Significant	Not Significant	0.195919	0.185092
Q61686	Chromobox protein homolog 5	Cbx5	15701000	12339000	19810000	11313000	12349000	0	0.623787	2.1049	2.21885	0.103082	0.0655152	0.125505	0.0905616	4	2.40262	0.0966032	0.131736	0.118552	Not Significant	Not Significant	1.18366	0.986817
Q61699	Heat shock protein 105 kDa	Hsph1	8568900	0	0	9172500	0	0	-0.35408	-1.21708	-1.27565	0.29047	0.246407	0.248752	0.216786	4	2.40262	0.0966032	0.126957	0.115567	Not Significant	Not Significant	0.608346	0.536899
Q61702	Inter-alpha-trypsin inhibitor heavy chain H1	Itih1	59007000	174170000	105000000	22514000	5139800	21213000	2.92669	3.527	4.34195	0.0242962	0.00417893	0.0594171	0.0196491	4	2.40262	0.0966032	1.03284	0.681515	Significant	Significant	2.37894	1.61446
Q61703	Inter-alpha-trypsin inhibitor heavy chain H2	Itih2	84434000	217700000	203850000	30150000	23853000	57110000	2.17049	3.74592	4.48773	0.0200179	0.0035431	0.0552126	0.0187127	4	2.40262	0.0966032	0.503603	0.350874	Significant	Significant	2.45062	1.69858
Q61704	Inter-alpha-trypsin inhibitor heavy chain H3	Itih3	18680000	43525000	17759000	7968100	8103000	10812000	1.45681	3.28742	3.80155	0.0302887	0.00792232	0.0649605	0.0268209	4	2.40262	0.0966032	0.294567	0.22028	Not Significant	Not Significant	2.10115	1.51872
Q61735	Leukocyte surface antigen CD47	Cd47	0	43267000	35534000	0	17417000	17070000	0.784213	0.788944	0.979164	0.474276	0.363035	0.33645	0.279387	4	2.40262	0.0966032	1.48206	0.962162	Not Significant	Not Significant	0.440051	0.323969
Q61749	Translation initiation factor eIF-2B subunit delta	Eif2b4	0	3541000	3956400	0	5177100	0	-0.81365	-2.52304	-2.72522	0.0651456	0.0322387	0.0945759	0.0574161	4	2.40262	0.0966032	0.155998	0.13371	Not Significant	Not Significant	1.49162	1.18611
Q61753	D-3-phosphoglycerate dehydrogenase	Phgdh	252550000	267800000	320120000	179340000	235520000	220770000	0.405082	2.58033	2.03653	0.0613058	0.0848982	0.0913528	0.1053	4	2.40262	0.0966032	0.036968	0.0593464	Not Significant	Not Significant	1.0711	1.2125
Q61768	Kinesin-1 heavy chain	Kif5b	170860000	156000000	175240000	138090000	128440000	112740000	0.407997	4.09546	2.34127	0.0149083	0.0550924	0.0492847	0.08051	4	2.40262	0.0966032	0.0148867	0.0455513	Not Significant	Not Significant	1.25891	1.82657
Q61771	Kinesin-like protein KIF3B;Kinesin-like protein KIF3B, N-terminally processed	Kif3b	15684000	13973000	14770000	29280000	32515000	24117000	-0.942155	-6.97232	-4.99518	0.00222491	0.00204269	0.0253875	0.0150742	4	2.40262	0.0966032	0.0273893	0.0533622	Not Significant	Not Significant	2.6898	2.65269
Q61792	LIM and SH3 domain protein 1	Lasp1	173180000	160770000	149560000	127690000	105160000	133830000	0.404121	3.29273	2.20539	0.0301382	0.0667784	0.0648285	0.0910218	4	2.40262	0.0966032	0.0225944	0.0503666	Not Significant	Not Significant	1.17536	1.52088
Q61823	Programmed cell death protein 4	Pdcd4	72022000	63481000	79657000	108720000	140870000	126950000	-0.805488	-5.58975	-4.17963	0.00502536	0.00504073	0.0334358	0.0214457	4	2.40262	0.0966032	0.0311476	0.0557101	Not Significant	Not Significant	2.29751	2.29883
Q61830	Macrophage mannose receptor 1	Mrc1	193460000	248660000	244320000	99846000	101390000	88190000	1.23953	9.32221	6.60555	0.000737009	0.000442316	0.0192234	0.00757542	4	2.40262	0.0966032	0.0265198	0.052819	Not Significant	Not Significant	3.35427	3.13253
Q61838	Alpha-2-macroglobulin;Alpha-2-macroglobulin 165 kDa subunit;Alpha-2-macroglobulin 35 kDa subunit	Pzp	516750000	1136200000	867510000	192750000	179960000	345630000	1.80295	4.02687	4.66446	0.0157744	0.00291263	0.0510938	0.0171748	4	2.40262	0.0966032	0.300694	0.224108	Not Significant	Not Significant	2.53571	1.80205
Q61845	Meiosis-expressed gene 1 protein	Meig1	119890000	38460000	27819000	175660000	142610000	147670000	-1.61665	-2.50344	-3.02986	0.0665217	0.0213161	0.0955772	0.0439407	4	2.40262	0.0966032	0.625532	0.427049	Not Significant	Not Significant	1.67129	1.17704
Q61879	Myosin-10	Myh10	176190000	191090000	202680000	205750000	194290000	194820000	-0.0635526	-0.985736	-0.388469	0.380069	0.71026	0.296818	0.416953	4	2.40262	0.0966032	0.00623501	0.0401462	Not Significant	Not Significant	0.148583	0.420138
Q61881	DNA replication licensing factor MCM7	Mcm7	21727000	28816000	27069000	24583000	27177000	28689000	-0.0591814	-0.423572	-0.310351	0.693662	0.76615	0.421895	0.437216	4	2.40262	0.0966032	0.0292824	0.0545449	Not Significant	Not Significant	0.115686	0.158852
Q61937	Nucleophosmin	Npm1	347010000	343300000	433130000	439890000	467040000	500630000	-0.331729	-2.7222	-1.81393	0.0528664	0.116522	0.0839494	0.13079	4	2.40262	0.0966032	0.0222749	0.050167	Not Significant	Not Significant	0.933592	1.27682
Q61941	NAD(P) transhydrogenase, mitochondrial	Nnt	96435000	136510000	163990000	74059000	58480000	64473000	0.983571	4.00796	3.95678	0.0160237	0.00656277	0.0512438	0.0242952	4	2.40262	0.0966032	0.0903349	0.0926871	Not Significant	Not Significant	2.18291	1.79524
Q61990	Poly(rC)-binding protein 2	Pcbp2	239220000	157840000	108070000	353660000	249600000	269660000	-0.848119	-2.32707	-2.59094	0.0805098	0.038822	0.108467	0.0650844	4	2.40262	0.0966032	0.199243	0.160727	Not Significant	Not Significant	1.41092	1.09415
Q61999	Outer dense fiber protein 1	Odf1	333010000	92630000	125840000	447400000	442840000	258150000	-1.23995	-2.01587	-2.42925	0.114033	0.0486709	0.133003	0.0740855	4	2.40262	0.0966032	0.56751	0.3908	Not Significant	Not Significant	1.31273	0.94297
Q62000	Mimecan	Ogn	330070000	549290000	1366700000	45724000	45243000	187710000	3.10589	3.42103	4.23006	0.0267549	0.00475348	0.06135	0.0208738	4	2.40262	0.0966032	1.23637	0.808669	Significant	Significant	2.32299	1.5726
Q62048	Astrocytic phosphoprotein PEA-15	Pea15	153860000	172190000	130980000	106770000	115090000	151880000	0.298255	1.55006	1.37142	0.19606	0.216369	0.191788	0.198007	4	2.40262	0.0966032	0.0555352	0.0709462	Not Significant	Not Significant	0.664805	0.707611
Q62084	Protein phosphatase 1 regulatory subunit 14B	Ppp1r14b	0	8236800	12422000	0	8142000	0	-0.568548	-0.786833	-0.960531	0.47538	0.371646	0.33645	0.282541	4	2.40262	0.0966032	0.783177	0.525536	Not Significant	Not Significant	0.429871	0.32296
Q62086	Serum paraoxonase/arylesterase 2	Pon2	8684500	11581000	11437000	7124100	7085000	7129600	0.558824	4.12304	2.95993	0.0145763	0.0234152	0.0488695	0.0466813	4	2.40262	0.0966032	0.0275553	0.0534659	Not Significant	Not Significant	1.6305	1.83635
Q62087	Serum paraoxonase/lactonase 3	Pon3	37721000	50232000	70122000	86070000	76334000	70724000	-0.602065	-2.21916	-2.27313	0.0906966	0.0606642	0.116733	0.0854762	4	2.40262	0.0966032	0.110408	0.105227	Not Significant	Not Significant	1.21707	1.04241
Q62093	Serine/arginine-rich splicing factor 2	Srsf2	107620000	118430000	163470000	141200000	138990000	156940000	-0.187976	-0.98657	-0.868477	0.379706	0.416496	0.296818	0.305372	4	2.40262	0.0966032	0.0544552	0.0702715	Not Significant	Not Significant	0.380389	0.420553
Q62095	ATP-dependent RNA helicase DDX3Y	Ddx3y	0	13813000	7097500	0	6467800	4678200	0.288858	0.559069	0.661042	0.605935	0.53164	0.390889	0.352292	4	2.40262	0.0966032	0.400433	0.286419	Not Significant	Not Significant	0.274382	0.217574
Q62100	Protamine-3	Prm3	22924000	0	0	45854000	0	0	0.0316841	0.0358139	0.0442308	0.973147	0.966068	0.501651	0.491745	4	2.40262	0.0966032	1.174	0.769703	Not Significant	Not Significant	0.0149924	0.0118217
Q62148	Retinal dehydrogenase 2	Aldh1a2	203500000	141340000	125500000	309690000	306970000	336440000	-1.04913	-4.90298	-4.56695	0.00802681	0.00324336	0.0389121	0.0182093	4	2.40262	0.0966032	0.0686798	0.0791582	Not Significant	Not Significant	2.489	2.09546
Q62186	Translocon-associated protein subunit delta	Ssr4	38111000	43866000	59006000	20985000	26946000	36733000	0.749222	2.50967	2.65145	0.0660805	0.0356951	0.0952836	0.0619633	4	2.40262	0.0966032	0.133684	0.119769	Not Significant	Not Significant	1.44739	1.17993
Q62188	Dihydropyrimidinase-related protein 3	Dpysl3	278950000	407830000	376810000	366770000	363480000	317630000	0.0059043	0.0328193	0.0280246	0.975391	0.978496	0.501877	0.494489	4	2.40262	0.0966032	0.0485479	0.0665809	Not Significant	Not Significant	0.00944103	0.0108212
Q62189	U1 small nuclear ribonucleoprotein A	Snrpa	89885000	76123000	132720000	88087000	96612000	64395000	0.242882	0.819447	0.863851	0.458548	0.418851	0.33066	0.306436	4	2.40262	0.0966032	0.131777	0.118578	Not Significant	Not Significant	0.37794	0.338615
Q62193	Replication protein A 32 kDa subunit	Rpa2	11322000	0	0	18523000	0	0	0.121265	0.194669	0.234861	0.85514	0.821649	0.471114	0.451426	4	2.40262	0.0966032	0.582067	0.399894	Not Significant	Not Significant	0.0853135	0.0679629
Q62203	Splicing factor 3A subunit 2	Sf3a2	14077000	16322000	15719000	16034000	17664000	14566000	-0.0639613	-0.622625	-0.364689	0.567268	0.727089	0.375451	0.423906	4	2.40262	0.0966032	0.0158297	0.0461404	Not Significant	Not Significant	0.138413	0.246211
Q62241	U1 small nuclear ribonucleoprotein C	Snrpc	24063000	14806000	23364000	30884000	30151000	30928000	-0.596898	-2.62833	-2.51365	0.0582882	0.0432404	0.0883676	0.0694653	4	2.40262	0.0966032	0.0773627	0.0845828	Not Significant	Not Significant	1.36411	1.23442
Q62252	Sperm surface protein Sp17	Spa17	162500000	68420000	87525000	313900000	270940000	269580000	-1.51943	-4.01817	-4.51008	0.0158885	0.00345552	0.0511198	0.0184919	4	2.40262	0.0966032	0.214485	0.170249	Not Significant	Not Significant	2.46149	1.79892
Q62261	Spectrin beta chain, non-erythrocytic 1	Sptbn1	670520000	1078500000	974180000	413880000	395570000	448780000	1.08709	5.05285	4.71824	0.00721665	0.00274647	0.0380026	0.016813	4	2.40262	0.0966032	0.0694304	0.0796272	Not Significant	Not Significant	2.56123	2.14166
Q62313	Trans-Golgi network integral membrane protein 1;Trans-Golgi network integral membrane protein 2	Tgoln1	7270000	10115000	14850000	10062000	9961600	9539000	0.0639034	0.213954	0.226074	0.841046	0.828189	0.467009	0.453101	4	2.40262	0.0966032	0.133813	0.11985	Not Significant	Not Significant	0.0818704	0.07518
Q62318	Transcription intermediary factor 1-beta	Trim28	543000000	375170000	504000000	651590000	685580000	643520000	-0.495118	-2.99626	-2.43849	0.0400895	0.0480436	0.0731581	0.0735727	4	2.40262	0.0966032	0.0409589	0.0618398	Not Significant	Not Significant	1.31836	1.39697
Q62348	Translin	Tsn	244330000	184750000	175590000	249490000	334620000	306120000	-0.562996	-2.90056	-2.57767	0.0440932	0.0395456	0.0760034	0.0660236	4	2.40262	0.0966032	0.0565116	0.0715562	Not Significant	Not Significant	1.4029	1.35563
Q62351	Transferrin receptor protein 1	Tfrc	28768000	23841000	16962000	16698000	18128000	16349000	0.411039	1.80567	1.72863	0.145277	0.13149	0.156269	0.142052	4	2.40262	0.0966032	0.0777285	0.0848114	Not Significant	Not Significant	0.881109	0.837805
Q62376	U1 small nuclear ribonucleoprotein 70 kDa	Snrnp70	95079000	72937000	118500000	93280000	80379000	57107000	0.313513	1.07609	1.12838	0.342465	0.299659	0.27834	0.245831	4	2.40262	0.0966032	0.127323	0.115796	Not Significant	Not Significant	0.523372	0.465384
Q62383	Transcription elongation factor SPT6	Supt6h	7811500	0	0	5028200	0	0	0.442453	0.760816	0.911825	0.489147	0.394895	0.342718	0.293559	4	2.40262	0.0966032	0.507303	0.353185	Not Significant	Not Significant	0.403519	0.31056
Q62384	Zinc finger protein ZPR1	Zpr1	10130000	12036000	9902600	12437000	10535000	11942000	-0.124668	-1.0896	-0.693179	0.337136	0.512547	0.275534	0.344855	4	2.40262	0.0966032	0.0196368	0.0485189	Not Significant	Not Significant	0.290266	0.472195
Q62393	Tumor protein D52	Tpd52	44870000	45723000	44578000	35311000	16404000	30807000	0.78586	2.30572	2.52662	0.0824188	0.0424635	0.110119	0.0685927	4	2.40262	0.0966032	0.174248	0.145111	Not Significant	Not Significant	1.37198	1.08397
Q62417	Sorbin and SH3 domain-containing protein 1	Sorbs1	8325000	30292000	17070000	10249000	9897400	10357000	0.678237	1.25738	1.49455	0.277023	0.182596	0.240369	0.177343	4	2.40262	0.0966032	0.436438	0.308913	Not Significant	Not Significant	0.738508	0.557484
Q62418	Drebrin-like protein	Dbnl	80778000	61352000	53857000	57545000	45657000	45096000	0.39056	1.88795	1.73107	0.132063	0.131037	0.14649	0.141938	4	2.40262	0.0966032	0.0641929	0.076355	Not Significant	Not Significant	0.882607	0.879219
Q62419	Endophilin-A2	Sh3gl1	49574000	47480000	78106000	62401000	67062000	62084000	-0.166316	-0.715366	-0.690972	0.513919	0.513844	0.352051	0.345153	4	2.40262	0.0966032	0.0810783	0.0869041	Not Significant	Not Significant	0.289169	0.289105
Q62420	Endophilin-A1	Sh3gl2	8787600	0	0	10140000	0	0	-0.118361	-0.285046	-0.325919	0.789759	0.754877	0.452698	0.434185	4	2.40262	0.0966032	0.258629	0.197828	Not Significant	Not Significant	0.122124	0.102505
Q62421	Endophilin-A3	Sh3gl3	14639000	9394600	10735000	19942000	34334000	21645000	-1.10915	-3.58999	-3.83146	0.022962	0.00763788	0.057788	0.0263194	4	2.40262	0.0966032	0.14318	0.125702	Not Significant	Not Significant	2.11703	1.63899
Q62422	Osteoclast-stimulating factor 1	Ostf1	83964000	88013000	77509000	20170000	28704000	35722000	1.59719	6.48987	6.41413	0.00290679	0.000522414	0.0284036	0.00811816	4	2.40262	0.0966032	0.0908519	0.0930101	Not Significant	Not Significant	3.28198	2.53659
Q62425	Cytochrome c oxidase subunit NDUFA4	Ndufa4	132120000	123820000	236760000	72601000	87550000	83458000	0.956052	3.10208	3.30838	0.036148	0.0147628	0.0693989	0.0361098	4	2.40262	0.0966032	0.142478	0.125263	Not Significant	Not Significant	1.83083	1.44192
Q62426	Cystatin-B	Cstb	171180000	215040000	163670000	56358000	76090000	97016000	1.28538	4.99486	5.02085	0.00751775	0.00198847	0.0382496	0.0149471	4	2.40262	0.0966032	0.0993365	0.0983108	Not Significant	Not Significant	2.70148	2.12391
Q62433	Protein NDRG1	Ndrg1	22901000	22486000	15927000	0	13000000	17003000	0.921074	1.76237	2.08682	0.152794	0.0790349	0.161065	0.100654	4	2.40262	0.0966032	0.409719	0.292221	Not Significant	Not Significant	1.10218	0.815895
Q62446	Peptidyl-prolyl cis-trans isomerase FKBP3	Fkbp3	107340000	99323000	104340000	104780000	134720000	135640000	-0.261143	-2.05902	-1.41176	0.108573	0.204726	0.129766	0.191472	4	2.40262	0.0966032	0.0241283	0.0513249	Not Significant	Not Significant	0.688828	0.964279
Q62448	Eukaryotic translation initiation factor 4 gamma 2	Eif4g2	54470000	42032000	60881000	62605000	58351000	55255000	-0.178066	-1.0681	-0.873767	0.345649	0.413813	0.279821	0.303851	4	2.40262	0.0966032	0.0416896	0.0622963	Not Significant	Not Significant	0.383195	0.461365
Q62465	Synaptic vesicle membrane protein VAT-1 homolog	Vat1	662490000	546620000	483450000	125210000	145450000	184950000	1.89993	9.02054	8.34121	0.000836473	0.00011404	0.0196379	0.0037613	4	2.40262	0.0966032	0.066543	0.0778233	Not Significant	Not Significant	3.94294	3.07755
Q62522	Zona pellucida-binding protein 1	Zpbp	75003000	38171000	51214000	117330000	162830000	136860000	-1.38549	-4.42066	-4.73732	0.011505	0.00269009	0.0448038	0.0166572	4	2.40262	0.0966032	0.14734	0.128301	Not Significant	Not Significant	2.57023	1.93911
Q62523	Zyxin	Zyx	57635000	83675000	60163000	51050000	36029000	69273000	0.395752	1.23251	1.32971	0.285248	0.229026	0.245464	0.205814	4	2.40262	0.0966032	0.154652	0.132869	Not Significant	Not Significant	0.640116	0.544778
Q62559	Intraflagellar transport protein 52 homolog	Ift52	6978000	0	0	9833100	0	0	0.780382	1.61478	1.89226	0.181661	0.104249	0.181815	0.121034	4	2.40262	0.0966032	0.350333	0.255119	Not Significant	Not Significant	0.981928	0.740739
Q63810	Calcineurin subunit B type 1	Ppp3r1	0	28961000	24961000	0	21881000	20979000	0.494475	0.484521	0.601924	0.653352	0.567916	0.408257	0.365813	4	2.40262	0.0966032	1.56227	1.01227	Not Significant	Not Significant	0.245716	0.184853
Q63811	Calcineurin subunit B type 2	Ppp3r2	7341100	0	6214700	11756000	16672000	0	-0.946184	-5.32257	-4.51537	0.00599517	0.00343515	0.0354849	0.018444	4	2.40262	0.0966032	0.0474022	0.0658652	Not Significant	Not Significant	2.46405	2.2222
Q63829	COMM domain-containing protein 3	Commd3	0	15883000	13846000	0	0	10590000	0.514912	2.16666	2.11179	0.096169	0.076277	0.120287	0.0983826	4	2.40262	0.0966032	0.0847181	0.0891781	Not Significant	Not Significant	1.11761	1.01696
Q63844	Mitogen-activated protein kinase 3	Mapk3	180850000	186970000	158750000	108710000	116080000	111810000	0.642568	8.33779	3.84848	0.00113086	0.00748101	0.0222693	0.026032	4	2.40262	0.0966032	0.00890897	0.0418167	Not Significant	Not Significant	2.12604	2.94659
Q63850	Nuclear pore glycoprotein p62	Nup62	36280000	45882000	35074000	44214000	57120000	52426000	-0.393759	-2.41241	-1.94913	0.0733631	0.096147	0.101965	0.113752	4	2.40262	0.0966032	0.0399622	0.0612171	Not Significant	Not Significant	1.01706	1.13452
Q63918	Serum deprivation-response protein	Cavin2	0	36632000	13085000	0	0	12425000	1.30762	2.6739	3.13861	0.0555798	0.0184438	0.0859262	0.0405084	4	2.40262	0.0966032	0.358725	0.260363	Not Significant	Not Significant	1.73415	1.25508
Q63932	Dual specificity mitogen-activated protein kinase kinase 2	Map2k2	0	12873000	17543000	0	14536000	0	0.384357	0.678809	0.811261	0.534504	0.44632	0.361779	0.320013	4	2.40262	0.0966032	0.480912	0.336698	Not Significant	Not Significant	0.350354	0.272049
Q64010	Adapter molecule crk	Crk	25075000	45092000	35925000	19647000	23851000	27637000	0.549717	1.93075	2.00981	0.125708	0.0881903	0.141887	0.10805	4	2.40262	0.0966032	0.121596	0.112217	Not Significant	Not Significant	1.05458	0.900639
Q64012	RNA-binding protein Raly	Raly	26994000	37012000	46078000	22824000	30382000	21116000	0.550868	2.00352	2.06162	0.115651	0.08192	0.134318	0.10295	4	2.40262	0.0966032	0.113397	0.107095	Not Significant	Not Significant	1.08661	0.93685
Q640N1	Adipocyte enhancer-binding protein 1	Aebp1	14797000	48632000	39312000	0	0	6632100	1.69887	2.88989	3.46729	0.044568	0.0120318	0.0763672	0.0323901	4	2.40262	0.0966032	0.518382	0.360107	Not Significant	Not Significant	1.91967	1.35098
Q64105	Sepiapterin reductase	Spr	70516000	92819000	102040000	54240000	51917000	62590000	0.640646	3.57055	3.04449	0.0233643	0.0209031	0.0583601	0.0433263	4	2.40262	0.0966032	0.0482901	0.0664198	Not Significant	Not Significant	1.67979	1.63145
Q64133	Amine oxidase [flavin-containing] A	Maoa	134700000	127870000	120510000	12290000	14178000	12965000	3.2812	43.1989	19.6894	1.71677e-06	5.71119e-07	0.00141066	0.000307667	4	2.40262	0.0966032	0.0086539	0.0416574	Significant	Significant	6.24327	5.76529
Q64152	Transcription factor BTF3	Btf3	44233000	45654000	13881000	42743000	63279000	52035000	-0.775974	-1.31914	-1.5828	0.257569	0.161452	0.229176	0.163002	4	2.40262	0.0966032	0.519046	0.360522	Not Significant	Not Significant	0.791958	0.589106
Q64191	N(4)-(beta-N-acetylglucosaminyl)-L-asparaginase;Glycosylasparaginase alpha chain;Glycosylasparaginase beta chain	Aga	20783000	32161000	26712000	13473000	21490000	23293000	0.46819	1.52766	1.62661	0.201313	0.15183	0.194724	0.15664	4	2.40262	0.0966032	0.14089	0.124271	Not Significant	Not Significant	0.818642	0.696128
Q64213	Splicing factor 1	Sf1	40304000	36953000	42090000	42326000	58926000	41168000	-0.237293	-1.35502	-1.14001	0.246883	0.295127	0.222437	0.243473	4	2.40262	0.0966032	0.0460014	0.06499	Not Significant	Not Significant	0.52999	0.607509
Q64310	Surfeit locus protein 4	Surf4	0	19960000	23621000	0	16422000	18089000	-0.0253464	-0.0390682	-0.0473021	0.970708	0.963714	0.50118	0.490827	4	2.40262	0.0966032	0.631359	0.430689	Not Significant	Not Significant	0.016052	0.0129113
Q64314	Hematopoietic progenitor cell antigen CD34	Cd34	36151000	93306000	69434000	21027000	12490000	45016000	1.43606	2.13659	2.59436	0.0994679	0.038638	0.123184	0.0649845	4	2.40262	0.0966032	0.677635	0.4596	Not Significant	Not Significant	1.41299	1.00232
Q64324	Syntaxin-binding protein 2	Stxbp2	19027000	22915000	21813000	18171000	29761000	24850000	-0.166259	-0.745961	-0.707636	0.497143	0.504105	0.345127	0.340713	4	2.40262	0.0966032	0.0745129	0.0828024	Not Significant	Not Significant	0.297479	0.303518
Q64327	Male-enhanced antigen 1	Mea1	18550000	0	0	40190000	37322000	45914000	-2.12768	-4.16441	-4.91695	0.0140948	0.00221849	0.0485815	0.015521	4	2.40262	0.0966032	0.39156	0.280876	Significant	Significant	2.65394	1.85094
Q64331	Unconventional myosin-VI	Myo6	62890000	37780000	57059000	32496000	27857000	21714000	0.92866	3.29371	3.41771	0.0301106	0.0128195	0.0648285	0.033699	4	2.40262	0.0966032	0.119244	0.110748	Not Significant	Not Significant	1.89213	1.52128
Q64337	Sequestosome-1	Sqstm1	10240000	0	0	8616500	0	0	0.356949	1.03702	1.13915	0.3583	0.295459	0.28627	0.243622	4	2.40262	0.0966032	0.177716	0.147278	Not Significant	Not Significant	0.529503	0.445754
Q64338	Calcium/calmodulin-dependent 3,5-cyclic nucleotide phosphodiesterase 1C	Pde1c	11814000	8976800	14095000	20862000	27693000	16552000	-0.892483	-3.11739	-3.25081	0.0356163	0.0159129	0.0693989	0.0375497	4	2.40262	0.0966032	0.122944	0.11306	Not Significant	Not Significant	1.79825	1.44835
Q64368	Deleted in azoospermia-like	Dazl	12526000	19857000	17979000	24060000	29538000	26310000	-0.687978	-3.13594	-2.95414	0.0349841	0.0235988	0.0687712	0.0466813	4	2.40262	0.0966032	0.0721944	0.0813539	Not Significant	Not Significant	1.62711	1.45613
Q64378	Peptidyl-prolyl cis-trans isomerase FKBP5;Peptidyl-prolyl cis-trans isomerase FKBP5, N-terminally processed	Fkbp5	15586000	34239000	20132000	17003000	27002000	22462000	0.0196799	0.0509117	0.057408	0.961837	0.95597	0.498362	0.488722	4	2.40262	0.0966032	0.224132	0.176276	Not Significant	Not Significant	0.0195556	0.0168986
Q64433	10 kDa heat shock protein, mitochondrial	Hspe1	1012800000	1308800000	2329600000	445550000	696280000	725320000	1.25953	2.99402	3.43144	0.0401781	0.0125959	0.0731581	0.0334262	4	2.40262	0.0966032	0.265459	0.202095	Not Significant	Not Significant	1.89977	1.39601
Q64435	UDP-glucuronosyltransferase 1-6	Ugt1a6	125070000	210750000	284720000	323040000	269810000	260760000	-0.532856	-1.48137	-1.64442	0.212629	0.148075	0.201984	0.153873	4	2.40262	0.0966032	0.19408	0.157501	Not Significant	Not Significant	0.829519	0.672378
Q64442	Sorbitol dehydrogenase	Sord	181320000	104280000	148300000	231090000	346420000	291790000	-1.01946	-3.53765	-3.69679	0.0240643	0.00901436	0.0590793	0.0280595	4	2.40262	0.0966032	0.124567	0.114074	Not Significant	Not Significant	2.04507	1.61863
Q64467	Glyceraldehyde-3-phosphate dehydrogenase, testis-specific	Gapdhs	271240000	93937000	107700000	564850000	350480000	326860000	-1.51984	-2.811	-3.34213	0.0482678	0.0141307	0.0797216	0.0352968	4	2.40262	0.0966032	0.438496	0.310199	Not Significant	Not Significant	1.84984	1.31634
Q64471	Glutathione S-transferase theta-1	Gstt1	43103000	116580000	71638000	37173000	54515000	86439000	0.34639	0.637108	0.757978	0.558693	0.47543	0.372325	0.33005	4	2.40262	0.0966032	0.443401	0.313264	Not Significant	Not Significant	0.322913	0.252827
Q64511	DNA topoisomerase 2-beta	Top2b	0	5240200	16119000	0	5153100	0	-0.0337498	-0.0552284	-0.0665132	0.958605	0.948998	0.498362	0.487819	4	2.40262	0.0966032	0.560155	0.386205	Not Significant	Not Significant	0.0227347	0.0183603
Q64514	Tripeptidyl-peptidase 2	Tpp2	918250000	570120000	775230000	1241200000	1402100000	1266200000	-0.813612	-3.90237	-3.59134	0.0175064	0.010283	0.0524998	0.0302029	4	2.40262	0.0966032	0.0652034	0.0769863	Not Significant	Not Significant	1.98788	1.7568
Q64516	Glycerol kinase	Gk	15815000	0	11757000	23761000	18698000	15197000	-0.324418	-1.21369	-1.23679	0.291626	0.2596	0.249097	0.224357	4	2.40262	0.0966032	0.107173	0.103206	Not Significant	Not Significant	0.585695	0.535173
Q64520	Guanylate kinase	Guk1	22140000	42747000	25141000	28836000	95477000	102270000	-1.18827	-1.79933	-2.18176	0.146352	0.0690564	0.156891	0.0928629	4	2.40262	0.0966032	0.654183	0.444948	Not Significant	Not Significant	1.1608	0.834602
Q64521	Glycerol-3-phosphate dehydrogenase, mitochondrial	Gpd2	193550000	116180000	162310000	266600000	337380000	220910000	-0.814897	-2.92033	-3.01994	0.0432293	0.0216012	0.0753853	0.0443588	4	2.40262	0.0966032	0.116797	0.109219	Not Significant	Not Significant	1.66552	1.36422
Q64523	Histone H2A type 2-C;Histone H2A type 2-A;Histone H2A type 2-B	Hist2h2ac	2597000000	1341900000	4552000000	2595900000	1582100000	1477600000	0.462097	0.810616	0.969486	0.463058	0.367488	0.332564	0.28134	4	2.40262	0.0966032	0.487448	0.340781	Not Significant	Not Significant	0.434757	0.334364
Q64669	NAD(P)H dehydrogenase [quinone] 1	Nqo1	0	9573600	10165000	0	4139500	0	0.761275	2.73419	2.82538	0.0522173	0.0281032	0.0835575	0.0525516	4	2.40262	0.0966032	0.116284	0.108899	Not Significant	Not Significant	1.55124	1.28219
Q64674	Spermidine synthase	Srm	19694000	48898000	30007000	12119000	12111000	11780000	1.3543	3.57023	4.00998	0.0233709	0.0061579	0.0583601	0.0239168	4	2.40262	0.0966032	0.215839	0.171095	Not Significant	Not Significant	2.21057	1.63132
Q64726	Zinc-alpha-2-glycoprotein	Azgp1	22626000	86506000	55096000	0	14839000	41000000	1.33913	1.65474	2.03431	0.17332	0.0851674	0.17604	0.105392	4	2.40262	0.0966032	0.982372	0.649983	Not Significant	Not Significant	1.06973	0.761152
Q64727	Vinculin	Vcl	862360000	1463200000	1458500000	734250000	756150000	781170000	0.695059	2.72791	2.73201	0.052556	0.0319389	0.0836116	0.0570989	4	2.40262	0.0966032	0.097381	0.0970891	Not Significant	Not Significant	1.49568	1.27938
Q64737	Trifunctional purine biosynthetic protein adenosine-3;Phosphoribosylamine--glycine ligase;Phosphoribosylformylglycinamidine cyclo-ligase;Phosphoribosylglycinamide formyltransferase	Gart	109410000	114160000	134830000	111550000	111390000	118890000	0.0630019	0.649175	0.36343	0.551617	0.727984	0.368805	0.423983	4	2.40262	0.0966032	0.0141278	0.0450772	Not Significant	Not Significant	0.137878	0.258363
Q66GT5	Phosphatidylglycerophosphatase and protein-tyrosine phosphatase 1	Ptpmt1	0	0	6701300	0	6603600	6889200	-0.646269	-0.980743	-1.18898	0.382248	0.276669	0.297708	0.233856	4	2.40262	0.0966032	0.651339	0.443171	Not Significant	Not Significant	0.55804	0.417655
Q66JS6	Eukaryotic translation initiation factor 3 subunit J-B;Eukaryotic translation initiation factor 3 subunit J-A	Eif3j2	60652000	49528000	53848000	58677000	67745000	80675000	-0.329113	-2.08861	-1.65219	0.104996	0.146464	0.126595	0.153207	4	2.40262	0.0966032	0.037245	0.0595195	Not Significant	Not Significant	0.83427	0.978828
Q66JX5	FGFR1 oncogene partner	Fgfr1op	10724000	0	0	9759700	12925000	11819000	0.0854338	0.574643	0.438403	0.596306	0.675502	0.387255	0.405083	4	2.40262	0.0966032	0.0331554	0.0569645	Not Significant	Not Significant	0.170373	0.224531
Q689Z5	Protein strawberry notch homolog 1	Sbno1	12161000	11108000	10469000	14120000	21651000	15543000	-0.582818	-2.95703	-2.64817	0.0416771	0.0358575	0.0742057	0.0621117	4	2.40262	0.0966032	0.05827	0.0726547	Not Significant	Not Significant	1.44542	1.3801
Q68FD5	Clathrin heavy chain 1	Cltc	2711900000	2836700000	2420800000	2227600000	2076300000	1922800000	0.355429	3.88054	2.07261	0.0178331	0.080649	0.0528003	0.101786	4	2.40262	0.0966032	0.0125839	0.0441126	Not Significant	Not Significant	1.0934	1.74877
Q68FF6	ARF GTPase-activating protein GIT1	Git1	100070000	47254000	62656000	154320000	113630000	100750000	-0.858669	-2.3529	-2.62048	0.0782672	0.0372612	0.106389	0.0633845	4	2.40262	0.0966032	0.199773	0.161058	Not Significant	Not Significant	1.42874	1.10642
Q68FH4	N-acetylgalactosamine kinase	Galk2	15722000	34281000	29428000	12819000	10799000	13414000	1.03149	2.88901	3.20147	0.0446073	0.0169763	0.0763672	0.0386965	4	2.40262	0.0966032	0.191215	0.155711	Not Significant	Not Significant	1.77016	1.35059
Q68FL4	Putative adenosylhomocysteinase 3	Ahcyl2	13683000	10811000	25471000	14909000	16439000	21119000	-0.152702	-0.383719	-0.435217	0.72071	0.677695	0.431479	0.406097	4	2.40262	0.0966032	0.237551	0.184659	Not Significant	Not Significant	0.168966	0.142239
Q68FL6	Methionine--tRNA ligase, cytoplasmic	Mars	118230000	100490000	101180000	145870000	147570000	123570000	-0.381946	-3.38827	-2.13162	0.0275739	0.074156	0.0619901	0.0964202	4	2.40262	0.0966032	0.0190607	0.048159	Not Significant	Not Significant	1.12985	1.5595
Q69Z23	Dynein heavy chain 17, axonemal	Dnah17	77983000	19093000	30209000	219250000	159770000	87324000	-2.02921	-2.84403	-3.4688	0.0466769	0.0120086	0.0782467	0.0323901	4	2.40262	0.0966032	0.763619	0.513318	Significant	Significant	1.92051	1.3309
Q69ZN7	Myoferlin	Myof	219380000	264210000	229080000	2444000	5547400	17575000	5.25534	6.33555	7.7993	0.00317774	0.000169457	0.0284036	0.00480462	4	2.40262	0.0966032	1.03211	0.681055	Significant	Significant	3.77094	2.49788
Q69ZS7	HBS1-like protein	Hbs1l	9232200	0	0	13770000	0	0	-0.884715	-3.46905	-3.47546	0.0256058	0.0119071	0.0604994	0.0322875	4	2.40262	0.0966032	0.0975612	0.0972017	Not Significant	Not Significant	1.92419	1.59166
Q6A026	Sister chromatid cohesion protein PDS5 homolog A	Pds5a	0	15325000	16177000	17535000	12531000	0	-0.200618	-0.456478	-0.527143	0.671734	0.615855	0.414345	0.386675	4	2.40262	0.0966032	0.289728	0.217257	Not Significant	Not Significant	0.210521	0.172803
Q6A028	Switch-associated protein 70	Swap70	0	9023100	7350900	0	4609800	0	0.440139	1.83369	1.79445	0.140624	0.119786	0.153148	0.133065	4	2.40262	0.0966032	0.0864206	0.0902417	Not Significant	Not Significant	0.921592	0.851942
Q6A068	Cell division cycle 5-like protein	Cdc5l	35698000	26000000	33936000	42661000	35817000	34749000	-0.251121	-1.48418	-1.22458	0.211926	0.263872	0.201433	0.226354	4	2.40262	0.0966032	0.0429424	0.0630789	Not Significant	Not Significant	0.578606	0.673815
Q6A0A9	Constitutive coactivator of PPAR-gamma-like protein 1	FAM120A	18026000	44059000	56770000	17849000	9615300	11661000	1.4979	2.64189	3.15783	0.0574669	0.017981	0.0876888	0.040193	4	2.40262	0.0966032	0.482203	0.337505	Not Significant	Not Significant	1.74519	1.24058
Q6A4J8	Ubiquitin carboxyl-terminal hydrolase 7	Usp7	290890000	171590000	184100000	429280000	412210000	371540000	-0.946296	-3.83651	-3.79503	0.0185146	0.00798577	0.0536629	0.0268209	4	2.40262	0.0966032	0.0912581	0.0932639	Not Significant	Not Significant	2.09768	1.73248
Q6DFW4	Nucleolar protein 58	Nop58	57595000	62181000	62868000	57644000	44908000	36161000	0.422055	2.12743	1.91142	0.100498	0.101446	0.1239	0.118759	4	2.40262	0.0966032	0.0590364	0.0731336	Not Significant	Not Significant	0.993764	0.997842
Q6DID5	PWWP domain-containing protein MUM1	Mum1	9128000	10280000	8828900	13078000	12945000	11770000	-0.422045	-5.12468	-2.50418	0.0068638	0.0438171	0.0373508	0.0700435	4	2.40262	0.0966032	0.0101736	0.0426068	Not Significant	Not Significant	1.35836	2.16344
Q6EDY6	Leucine-rich repeat-containing protein 16A	Carmil1	0	4174700	5128500	0	6093800	0	-0.609052	-1.05802	-1.26668	0.349709	0.249399	0.282236	0.21831	4	2.40262	0.0966032	0.497065	0.34679	Not Significant	Not Significant	0.603105	0.456293
Q6GQT9	Nodal modulator 1	Nomo1	67969000	64979000	64569000	68715000	68294000	61310000	-0.00427139	-0.07329	-0.0263439	0.945094	0.979785	0.495111	0.494831	4	2.40262	0.0966032	0.00509496	0.0394339	Not Significant	Not Significant	0.00886917	0.024525
Q6IE21	OTU domain-containing protein 6A	Otud6a	0	0	3178300	0	7664900	0	-0.262269	-0.393609	-0.47761	0.71395	0.648799	0.429409	0.397454	4	2.40262	0.0966032	0.665972	0.452313	Not Significant	Not Significant	0.18789	0.146332
Q6IRU2	Tropomyosin alpha-4 chain	Tpm4	54684000	104510000	41096000	16535000	16743000	20891000	1.78124	4.31142	4.92506	0.012532	0.00219947	0.0470347	0.015521	4	2.40262	0.0966032	0.256033	0.196206	Not Significant	Not Significant	2.65768	1.90198
Q6IRU5	Clathrin light chain B	Cltb	30538000	32336000	32622000	20345000	24847000	25231000	0.44555	4.26834	2.53159	0.0129673	0.0421699	0.0475151	0.0683371	4	2.40262	0.0966032	0.0163443	0.0464619	Not Significant	Not Significant	1.375	1.88715
Q6J756	Calpain-11	Capn11	11760000	0	0	16161000	16959000	14248000	-0.649141	-3.79003	-3.149	0.0192683	0.0181919	0.0543146	0.0404514	4	2.40262	0.0966032	0.0440031	0.0637416	Not Significant	Not Significant	1.74012	1.71516
Q6NS82	Protein FAM134A	Retreg2	24276000	0	0	28888000	18794000	0	-0.133528	-0.198363	-0.240891	0.852435	0.817169	0.47057	0.450777	4	2.40262	0.0966032	0.679693	0.460886	Not Significant	Not Significant	0.0876879	0.0693389
Q6NSR8	Probable aminopeptidase NPEPL1	Npepl1	4954100	0	0	3187500	0	0	0.150148	0.283628	0.336373	0.79077	0.747343	0.45312	0.432129	4	2.40262	0.0966032	0.420373	0.298876	Not Significant	Not Significant	0.12648	0.10195
Q6NSU3	Glycosyltransferase 8 domain-containing protein 1	Glt8d1	7913300	0	0	16809000	0	0	-1.38452	-6.33388	-5.957	0.00318083	0.000789768	0.0284036	0.00984595	4	2.40262	0.0966032	0.0716717	0.0810274	Not Significant	Not Significant	3.1025	2.49746
Q6NV83	U2 snRNP-associated SURP motif-containing protein	U2surp	0	15436000	16702000	0	21385000	19858000	-0.527448	-0.937422	-1.11957	0.401614	0.303131	0.305702	0.247487	4	2.40262	0.0966032	0.474875	0.332926	Not Significant	Not Significant	0.518369	0.396191
Q6NVF9	Cleavage and polyadenylation specificity factor subunit 6	Cpsf6	59362000	33009000	28096000	29252000	33522000	27329000	0.346229	1.02082	1.11725	0.365057	0.304052	0.289652	0.24755	4	2.40262	0.0966032	0.172553	0.144053	Not Significant	Not Significant	0.517052	0.43764
Q6NWV3	Intraflagellar transport protein 122 homolog	Ift122	75342000	52615000	59109000	124000000	129170000	129330000	-1.04805	-6.81091	-5.30971	0.00242861	0.00147793	0.0264316	0.0129435	4	2.40262	0.0966032	0.0355176	0.0584403	Not Significant	Not Significant	2.83035	2.61464
Q6NY15	Testis-specific gene 10 protein	Tsga10	0	0	5827400	0	12683000	7973100	-0.516299	-1.79294	-1.87315	0.147445	0.10712	0.157549	0.123569	4	2.40262	0.0966032	0.124383	0.113959	Not Significant	Not Significant	0.970129	0.83137
Q6NZA9	Transcription initiation factor TFIID subunit 9B;Transcription initiation factor TFIID subunit 9	Taf9b	0	2898800	3563600	4126700	5553600	0	-0.911445	-1.76896	-2.09088	0.151624	0.07858	0.16014	0.100505	4	2.40262	0.0966032	0.398215	0.285033	Not Significant	Not Significant	1.10469	0.819232
Q6NZB0	DnaJ homolog subfamily C member 8	Dnajc8	39741000	39534000	0	29978000	44250000	43423000	-0.663028	-0.915752	-1.11806	0.41161	0.303728	0.310435	0.24755	4	2.40262	0.0966032	0.786319	0.527499	Not Significant	Not Significant	0.517516	0.385514
Q6NZC7	SEC23-interacting protein	Sec23ip	115360000	99770000	119490000	154840000	146050000	149490000	-0.432526	-5.1909	-2.56185	0.00655699	0.0404267	0.0369031	0.0664646	4	2.40262	0.0966032	0.0104143	0.0427572	Not Significant	Not Significant	1.39333	2.1833
Q6NZJ6	Eukaryotic translation initiation factor 4 gamma 1	Eif4g1	141810000	100110000	106750000	205980000	152750000	122470000	-0.448775	-1.6835	-1.7139	0.167565	0.134256	0.172003	0.144361	4	2.40262	0.0966032	0.106591	0.102843	Not Significant	Not Significant	0.872067	0.775816
Q6NZK8	Protein tyrosine phosphatase domain-containing protein 1	Ptpdc1	11990000	0	0	18502000	15872000	14622000	-0.749976	-2.26794	-2.4661	0.0859232	0.0462172	0.113236	0.0722368	4	2.40262	0.0966032	0.16403	0.138728	Not Significant	Not Significant	1.3352	1.06589
Q6NZN0	RNA-binding protein 26	Rbm26	0	8343800	11319000	0	15618000	11291000	-0.422134	-1.85694	-1.77667	0.136885	0.122844	0.15017	0.135239	4	2.40262	0.0966032	0.077517	0.0846792	Not Significant	Not Significant	0.910648	0.863645
Q6P069	Sorcin	Sri	61616000	105940000	112380000	19593000	27277000	25534000	1.91612	6.13964	6.57156	0.003568	0.000455458	0.0293181	0.00757542	4	2.40262	0.0966032	0.1461	0.127526	Not Significant	Not Significant	3.34155	2.44758
Q6P1B1	Xaa-Pro aminopeptidase 1	Xpnpep1	662650000	618090000	662610000	803020000	811540000	715050000	-0.259973	-3.85748	-1.582	0.0181862	0.161633	0.0532757	0.163002	4	2.40262	0.0966032	0.00681301	0.0405073	Not Significant	Not Significant	0.791471	1.74026
Q6P1E8	EF-hand calcium-binding domain-containing protein 6	Efcab6	27504000	0	19508000	34921000	54881000	35889000	-1.53881	-2.02453	-2.4797	0.112913	0.0453444	0.132638	0.0714949	4	2.40262	0.0966032	0.866586	0.577646	Not Significant	Not Significant	1.34348	0.947255
Q6P1F6	Serine/threonine-protein phosphatase 2A 55 kDa regulatory subunit B alpha isoform	Ppp2r2a	78016000	90189000	52069000	82034000	68602000	75627000	-0.0720759	-0.289952	-0.287681	0.786262	0.782678	0.451481	0.442097	4	2.40262	0.0966032	0.0926869	0.0941565	Not Significant	Not Significant	0.106417	0.104432
Q6P2B1	Transportin-3	Tnpo3	30524000	32077000	21589000	40449000	43548000	37561000	-0.548722	-2.88894	-2.53902	0.0446104	0.0417347	0.0763672	0.0677195	4	2.40262	0.0966032	0.0541152	0.0700591	Not Significant	Not Significant	1.3795	1.35056
Q6P2K6	Serine/threonine-protein phosphatase 4 regulatory subunit 3A;Serine/threonine-protein phosphatase 4 regulatory subunit 3B	Ppp4r3a	9296200	11520000	0	7854700	12111000	8450300	0.158353	0.744251	0.691441	0.49807	0.513568	0.345127	0.345153	4	2.40262	0.0966032	0.0679056	0.0786745	Not Significant	Not Significant	0.289402	0.30271
Q6P3A8	2-oxoisovalerate dehydrogenase subunit beta, mitochondrial	Bckdhb	0	18692000	21324000	0	12670000	14829000	0.262083	0.454866	0.544625	0.672799	0.60445	0.414345	0.381887	4	2.40262	0.0966032	0.497969	0.347355	Not Significant	Not Significant	0.21864	0.172114
Q6P3D0	U8 snoRNA-decapping enzyme	Nudt16	6413900	0	0	3159800	0	0	0.126718	0.270555	0.3156	0.80012	0.762342	0.45546	0.436	4	2.40262	0.0966032	0.329046	0.241821	Not Significant	Not Significant	0.11785	0.096845
Q6P4T2	U5 small nuclear ribonucleoprotein 200 kDa helicase	Snrnp200	224590000	220380000	240750000	269210000	265110000	222290000	-0.137648	-1.42277	-0.794514	0.227883	0.45533	0.212231	0.322751	4	2.40262	0.0966032	0.0140398	0.0450222	Not Significant	Not Significant	0.341673	0.642288
Q6P542	ATP-binding cassette sub-family F member 1	Abcf1	20647000	19411000	24162000	15079000	23713000	14189000	0.310852	1.23391	1.23051	0.284778	0.26179	0.245284	0.225663	4	2.40262	0.0966032	0.095198	0.0957253	Not Significant	Not Significant	0.582047	0.545493
Q6P5D8	Structural maintenance of chromosomes flexible hinge domain-containing protein 1	Smchd1	58114000	26102000	24974000	71523000	22859000	20880000	0.0500606	0.0719963	0.0876486	0.946061	0.932834	0.495202	0.483663	4	2.40262	0.0966032	0.725208	0.489321	Not Significant	Not Significant	0.0301958	0.0240809
Q6P5E4	UDP-glucose:glycoprotein glucosyltransferase 1	Uggt1	421390000	467960000	454730000	351270000	356630000	329870000	0.372548	6.56226	2.30246	0.00278951	0.0581984	0.0280757	0.0833831	4	2.40262	0.0966032	0.00483449	0.0392712	Not Significant	Not Significant	1.23509	2.55447
Q6P5F9	Exportin-1	Xpo1	393730000	373030000	331340000	506670000	510560000	428820000	-0.396229	-3.59503	-2.22347	0.0228591	0.0650871	0.0577594	0.0902911	4	2.40262	0.0966032	0.0182213	0.0476346	Not Significant	Not Significant	1.1865	1.64094
Q6P6M7	O-phosphoseryl-tRNA(Sec) selenium transferase	Sepsecs	16932000	0	0	19061000	0	0	0.653658	1.04493	1.26115	0.355043	0.251261	0.284769	0.21926	4	2.40262	0.0966032	0.586975	0.40296	Not Significant	Not Significant	0.599875	0.44972
Q6P8I4	PEST proteolytic signal-containing nuclear protein	Pcnp	11950000	10587000	0	13684000	13673000	20746000	-0.969946	-1.83235	-2.17308	0.140843	0.0699129	0.153285	0.0931944	4	2.40262	0.0966032	0.42031	0.298837	Not Significant	Not Significant	1.15544	0.851265
Q6P8J2	Diamine acetyltransferase 2	Sat2	14970000	20627000	20183000	0	14606000	14990000	0.699458	1.69412	1.93501	0.165491	0.0980979	0.170321	0.115637	4	2.40262	0.0966032	0.255697	0.195996	Not Significant	Not Significant	1.00834	0.781225
Q6P8W9	High mobility group protein B4	Hmgb4	11115000	0	0	22416000	0	0	-0.233701	-0.340669	-0.414312	0.750493	0.69217	0.440405	0.410986	4	2.40262	0.0966032	0.705904	0.47726	Not Significant	Not Significant	0.159787	0.124653
Q6P8X1	Sorting nexin-6;Sorting nexin-6, N-terminally processed	Snx6	52545000	68380000	48979000	40858000	51944000	53818000	0.207876	1.07988	0.955636	0.340959	0.373933	0.277529	0.283587	4	2.40262	0.0966032	0.0555833	0.0709763	Not Significant	Not Significant	0.427206	0.467298
Q6P8Y0	Uncharacterized protein C15orf26 homolog	Cfap161	6833700	0	0	11693000	0	0	-0.0310203	-0.107635	-0.112479	0.919468	0.913888	0.488065	0.47869	4	2.40262	0.0966032	0.124589	0.114087	Not Significant	Not Significant	0.0391072	0.0364632
Q6P902	Thioredoxin domain-containing protein 2	Txndc2	124540000	49775000	102470000	253870000	285970000	257070000	-1.6256	-4.00301	-4.55804	0.0160898	0.00327562	0.0512438	0.0182093	4	2.40262	0.0966032	0.24737	0.190794	Not Significant	Not Significant	2.48471	1.79345
Q6P9Q6	FK506-binding protein 15	Fkbp15	0	6498000	0	0	11296000	0	-0.156086	-0.359538	-0.414338	0.73737	0.692153	0.435922	0.410986	4	2.40262	0.0966032	0.282702	0.212867	Not Significant	Not Significant	0.159798	0.132314
Q6P9R2	Serine/threonine-protein kinase OSR1	Oxsr1	82734000	81200000	101950000	113030000	66922000	42080000	0.3685	0.867074	0.995554	0.43482	0.355592	0.320009	0.275433	4	2.40262	0.0966032	0.270929	0.205512	Not Significant	Not Significant	0.449048	0.361691
Q6PA06	Atlastin-2	Atl2	17547000	15733000	21054000	23284000	20561000	12912000	-0.0296164	-0.103397	-0.107839	0.922625	0.917424	0.489108	0.479769	4	2.40262	0.0966032	0.123067	0.113136	Not Significant	Not Significant	0.03743	0.034975
Q6PAR5	GTPase-activating protein and VPS9 domain-containing protein 1	Gapvd1	14708000	11991000	16061000	13636000	14468000	14217000	0.00473724	0.0371776	0.0255746	0.972125	0.980375	0.501586	0.494857	4	2.40262	0.0966032	0.0243545	0.0514662	Not Significant	Not Significant	0.00860766	0.012278
Q6PAV2	Probable E3 ubiquitin-protein ligase HERC4	Herc4	75313000	69649000	64818000	84255000	101740000	105680000	-0.471271	-3.96559	-2.59463	0.0165998	0.0386232	0.0515741	0.0649845	4	2.40262	0.0966032	0.0211844	0.0494857	Not Significant	Not Significant	1.41315	1.7799
Q6PB44	Tyrosine-protein phosphatase non-receptor type 23	Ptpn23	27394000	23153000	26842000	22036000	17608000	17865000	0.432107	3.33567	2.32131	0.0289524	0.0566679	0.063419	0.0817733	4	2.40262	0.0966032	0.0251715	0.0519767	Not Significant	Not Significant	1.24666	1.53832
Q6PB66	Leucine-rich PPR motif-containing protein, mitochondrial	Lrpprc	120620000	163310000	182600000	120610000	159170000	139880000	0.140554	0.660321	0.613584	0.545136	0.560645	0.366015	0.362547	4	2.40262	0.0966032	0.067962	0.0787098	Not Significant	Not Significant	0.251312	0.263496
Q6PCM1	Lysine-specific demethylase 3A	Kdm3a	4515300	0	7899400	5837500	12939000	14451000	-0.664478	-1.3602	-1.59636	0.245376	0.158414	0.222336	0.160916	4	2.40262	0.0966032	0.35797	0.259891	Not Significant	Not Significant	0.800206	0.610168
Q6PD26	GPI transamidase component PIG-S	Pigs	25890000	20338000	23427000	23735000	25126000	19659000	0.0244527	0.166204	0.125954	0.876059	0.903631	0.476536	0.475231	4	2.40262	0.0966032	0.0324683	0.0565353	Not Significant	Not Significant	0.0440088	0.0574666
Q6PDG5	SWI/SNF complex subunit SMARCC2	Smarcc2	28583000	24887000	54213000	38237000	21404000	15609000	0.53132	1.03611	1.22392	0.358676	0.264104	0.286278	0.226377	4	2.40262	0.0966032	0.39445	0.282681	Not Significant	Not Significant	0.578226	0.445297
Q6PDI5	Proteasome-associated protein ECM29 homolog	Ecm29	67511000	88380000	97895000	76433000	103080000	99028000	-0.139216	-0.664806	-0.613081	0.542543	0.560958	0.365564	0.362547	4	2.40262	0.0966032	0.0657775	0.077345	Not Significant	Not Significant	0.25107	0.265566
Q6PDL0	Cytoplasmic dynein 1 light intermediate chain 2	Dync1li2	92880000	78103000	80056000	104260000	127070000	109790000	-0.441528	-3.81409	-2.44767	0.0188738	0.0474278	0.0538382	0.0729995	4	2.40262	0.0966032	0.0201014	0.0488091	Not Significant	Not Significant	1.32397	1.72414
Q6PDM2	Serine/arginine-rich splicing factor 1	Srsf1	328370000	287590000	345910000	280780000	388340000	373970000	-0.10665	-0.636074	-0.522076	0.559302	0.619183	0.37258	0.38786	4	2.40262	0.0966032	0.0421695	0.062596	Not Significant	Not Significant	0.208181	0.252354
Q6PDN3	Myosin light chain kinase, smooth muscle;Myosin light chain kinase, smooth muscle, deglutamylated form	Mylk	52396000	136290000	81822000	57198000	69301000	69277000	0.363112	0.887886	1.01234	0.424768	0.348093	0.315579	0.272296	4	2.40262	0.0966032	0.250875	0.192984	Not Significant	Not Significant	0.458304	0.371849
Q6PDQ2	Chromodomain-helicase-DNA-binding protein 4	Chd4	54086000	67836000	66204000	50255000	52335000	47012000	0.324717	2.87431	1.81125	0.0452715	0.116966	0.076916	0.13109	4	2.40262	0.0966032	0.0191441	0.048211	Not Significant	Not Significant	0.931941	1.34417
Q6PDY2	2-aminoethanethiol dioxygenase	Ado	8876000	0	0	10920000	0	0	0.333567	0.76102	0.878436	0.489038	0.411457	0.342718	0.302809	4	2.40262	0.0966032	0.288181	0.216291	Not Significant	Not Significant	0.385675	0.310657
Q6PE01	U5 small nuclear ribonucleoprotein 40 kDa protein	Snrnp40	30425000	0	0	31244000	0	27722000	-0.387128	-0.294216	-0.368144	0.783229	0.724633	0.450211	0.422902	4	2.40262	0.0966032	2.59697	1.6587	Not Significant	Not Significant	0.139882	0.106111
Q6PE15	Mycophenolic acid acyl-glucuronide esterase, mitochondrial	Abhd10	29506000	24376000	37109000	36760000	54462000	53808000	-0.67099	-2.62399	-2.63145	0.058554	0.0366981	0.0886071	0.0630275	4	2.40262	0.0966032	0.0980843	0.0975285	Not Significant	Not Significant	1.43536	1.23244
Q6PEB6	MOB-like protein phocein	Mob4	0	12981000	17614000	0	8586600	4091000	0.712142	1.20211	1.44341	0.295618	0.195992	0.251437	0.185885	4	2.40262	0.0966032	0.526423	0.365131	Not Significant	Not Significant	0.707761	0.529269
Q6PER3	Microtubule-associated protein RP/EB family member 3	Mapre3	29661000	18732000	25590000	42785000	58484000	48487000	-1.03103	-4.38165	-4.25339	0.0118596	0.00462678	0.0453256	0.0206488	4	2.40262	0.0966032	0.0830537	0.0881382	Not Significant	Not Significant	2.33472	1.92593
Q6PFD9	Nuclear pore complex protein Nup98-Nup96;Nuclear pore complex protein Nup98;Nuclear pore complex protein Nup96	Nup98	0	10938000	0	0	8053000	6833400	0.4339	1.25291	1.37837	0.278483	0.214321	0.241126	0.196801	4	2.40262	0.0966032	0.179899	0.148642	Not Significant	Not Significant	0.668935	0.555202
[truncated: 1,665 more rows]

## Sheet: WT_Only
LFQ.intensity.AROM_Rep1	LFQ.intensity.AROM_Rep2	LFQ.intensity.AROM_Rep3	LFQ.intensity.WT_Rep1	LFQ.intensity.WT_Rep2	LFQ.intensity.WT_Rep3	id	Uniprot	Symbol	ProteinNames
[truncated: 624 more rows]

[truncated: 1 more sheets: AROM+_Only]
