# Supplementary material for: MALDI-IMS combined with shotgun proteomics identify and localize new factors in male infertility
Source: Life Sci Alliance. 2021 Jan 6;4(3):e202000672. doi: 10.26508/lsa.202000672 (PMC7812314; doi:10.26508/lsa.202000672)
Supplement: Supplementary file 5 [file LSA-2020-00672TableS5.xlsx]

## Sheet: Sheet1
ID	Description	GeneRatio	BgRatio	pvalue	p.adjust	qvalue	geneID	Count
R-MMU-6798695	Neutrophil degranulation	36/264	447/7853	7.45098e-07	0.000493255	0.00048	Adam10/Stk10/Lamtor3/Apaf1/Cfd/Lyz2/Itgb2/Prkcd/Ptpn6/C5ar1/S100a9/Cd68/Cd63/Ctsh/Arsb/Rock1/Sirpa/Ctsc/Igf2r/A1bg/Hk3/Galns/Cybb/Ddx3x/Ano6/Hpse/Pgm1/Aldh3b1/Rap2c/Dock2/Nckap1l/Manba/Fuca1/Mospd2/Atp6ap2/Gmfg	36
R-MMU-114608	Platelet degranulation	12/264	106/7853	0.000214142	0.0312662	0.030426	Egf/Cfd/Cd63/Selenop/Lgals3bp/A1bg/Gas6/Nhlrc2/Endod1/Fermt3/Fam3c/Plek	12
R-MMU-76002	Platelet activation, signaling and aggregation	19/264	228/7853	0.000230261	0.0312662	0.030426	Egf/Cfd/Vav1/Prkcd/Ptpn6/Cd63/Syk/Selenop/Rac2/Lgals3bp/A1bg/Gas6/Nhlrc2/Endod1/Fermt3/Fam3c/Daglb/Raf1/Plek	19
R-MMU-5668599	RHO GTPases Activate NADPH Oxidases	5/264	18/7853	0.000247157	0.0312662	0.030426	S100a9/Ncf4/Rac2/Cybb/Pik3r4	5
R-MMU-9609523	Insertion of tail-anchored proteins into the endoplasmic reticulum membrane	5/264	18/7853	0.000247157	0.0312662	0.030426	Sec61g/Gm4184/Gm11575/Stx5a/Sec61b	5
R-MMU-166663	Initial triggering of complement	5/264	19/7853	0.000326289	0.0312662	0.030426	Cfd/C1qb/Crp/C2/Mbl2	5
R-MMU-76005	Response to elevated platelet cytosolic Ca2+	12/264	111/7853	0.000330609	0.0312662	0.030426	Egf/Cfd/Cd63/Selenop/Lgals3bp/A1bg/Gas6/Nhlrc2/Endod1/Fermt3/Fam3c/Plek	12
