# Supplementary material for: MALDI-IMS combined with shotgun proteomics identify and localize new factors in male infertility
Source: Life Sci Alliance. 2021 Jan 6;4(3):e202000672. doi: 10.26508/lsa.202000672 (PMC7812314; doi:10.26508/lsa.202000672)
Supplement: Supplementary file 6 [file LSA-2020-00672TableS6.xlsx]

## Sheet: Sheet 1
Mass	Uniprot	ProteinNames	Symbol	Intensity.WT_Rep1	Intensity.WT_Rep2	Intensity.WT_Rep3	Mean_wt	Median_wt	logFC	Pvalue_limma	MLP Score	Significant_in_Protein_Limma_Results
784.425	P80317	T-complex protein 1 subunit zeta	Cct6a	46082000	25848000	9856200	27262066.6666667	25848000	-1.27073249938513	0.269126987504911	1	0
814.486	P60843	Eukaryotic initiation factor 4A-I	Eif4a1	20336000	12333000	6689700	13119566.6666667	12333000	-1.27656108262471	0.28530067456017	1	0
834.457	Q60930	Voltage-dependent anion-selective channel protein 2	Vdac2	62779000	18166000	6378900	29107966.6666667	18166000	-1.26913397416736	0.28832288336139	1	0
845.365	P15265	Sperm mitochondrial-associated cysteine-rich protein	Smcp	14211000	26939000	3790600	14980200	14211000	-2.77215150765818	0.0119778246060968	1	1
894.444	Q9DAN6	Gametocyte-specific factor 1	Gtsf1	13702000	9735200	3476900	8971366.66666667	9735200	-0.236437351795256	0.819637009951116	1	0
939.531	P48774	Glutathione S-transferase Mu 5	Gstm5	123850000	73949000	31549000	76449333.3333333	73949000	-0.472374812478037	0.649132112331006	1	0
952.526	Q3V0Q1	Dynein heavy chain 12, axonemal	Dnah12	3663400	1875200	781560	2106720	1875200	-0.810049186001752	0.437413484751123	1	1
975.536	P54728	UV excision repair protein RAD23 homolog B	Rad23b	11014000	8373000	3572100	7653033.33333333	8373000	-0.347282280419102	0.750948532920483	1	0
996.508	P27786	Steroid 17-alpha-hydroxylase/17,20 lyase	Cyp17a1	213490000	90894000	34828000	113070666.666667	90894000	-4.73752779796834	4.88860457578893e-05	1	1
1011.47	Q6P5F9	Exportin-1	Xpo1	9081600	1930500	0	3670700	1930500	-0.00824701401297557	0.994074999659061	1	0
1031.49	P32037	Solute carrier family 2, facilitated glucose transporter member 3	Slc2a3	77662000	21227000	7028500	35305833.3333333	21227000	-1.28914639566848	0.252237238678679	1	0
1050.55	P17156	Heat shock-related 70 kDa protein 2	Hspa2	372740000	246100000	92136000	236992000	246100000	-0.242502665959533	0.815325482323947	1	0
1126.68	Q9WUL7	ADP-ribosylation factor-like protein 3	Arl3	70088000	51725000	23726000	48513000	51725000	-0.184398492844606	0.857733125260422	1	0
1230.67	Q91ZT8	Ankyrin repeat and SOCS box protein 9	Asb9	12108000	10229000	3461100	8599366.66666667	10229000	-2.20247591971209	0.0546465531587011	1	0
1232.64	P28665	Murinoglobulin-1	Mug1	11945000	1664700	1988900	5199533.33333333	1988900	-1.20515699761317	0.266165938293485	1	0
1246.58	P52194	Calmegin	Clgn	98875000	85600000	15138000	66537666.6666667	85600000	-1.0785076671111	0.310778288742022	1	0
1268.66	Q6ZQ38	Cullin-associated NEDD8-dissociated protein 1	Cand1	19045000	7658000	5773900	10825633.3333333	7658000	-1.18871618547132	0.292864441908143	1	0
1273.62	Q8JZU2	Tricarboxylate transport protein, mitochondrial	Slc25a1	15857000	2562000	790980	6403326.66666667	2562000	-0.408542162807322	0.714517254739468	1	0
1289.55	Q99MD9	Nuclear autoantigenic sperm protein	Nasp	62170000	36356000	14027000	37517666.6666667	36356000	-0.182173579019464	0.860277460479982	1	0
1293.61	Q9DBG6	Dolichyl-diphosphooligosaccharide--protein glycosyltransferase subunit 2	Rpn2	20031000	7155300	2570200	9918833.33333333	7155300	-0.144744782505461	0.891712929004964	1	0
1349.51	P48774	Glutathione S-transferase Mu 5	Gstm5	74912000	19206000	5683500	33267166.6666667	19206000	-0.10992892509382	0.919127278715509	1	0
1389.76	P61407	Tudor domain-containing protein 6	Tdrd6	13635000	4023700	2620500	6759733.33333333	4023700	-1.65454754610698	0.123528226790536	1	0
1409.74	P48722	Heat shock 70 kDa protein 4L	Hspa4l	136830000	94231000	45991000	92350666.6666667	94231000	-0.613580355673666	0.550222733678717	1	0
1429.77	Q62148	Retinal dehydrogenase 2	Aldh1a2	19622000	4550200	2324800	8832333.33333333	4550200	-1.39321931649747	0.196148076393497	1	0
1445.65	Q9D8N0	Elongation factor 1-gamma	Eef1g	44854000	37314000	5394200	29187400	37314000	-0.210347865738981	0.842434341570922	1	0
1731.92	Q9CXY6	Interleukin enhancer-binding factor 2	Ilf2	30301000	11798000	5642500	15913833.3333333	11798000	-1.12041034818023	0.338052664277044	1	0
1811.96	P27786	Steroid 17-alpha-hydroxylase/17,20 lyase	Cyp17a1	189450000	102750000	41466000	111222000	102750000	-5.41865511935165	5.88903574310531e-06	1	0
