# Supplementary material for: MALDI-IMS combined with shotgun proteomics identify and localize new factors in male infertility
Source: Life Sci Alliance. 2021 Jan 6;4(3):e202000672. doi: 10.26508/lsa.202000672 (PMC7812314; doi:10.26508/lsa.202000672)
Supplement: Supplementary file 7 [file LSA-2020-00672TableS7.xlsx]

## Sheet: Sheet 1
Mass	Uniprot	ProteinNames	Symbol	Intensity.WT_Rep1	Intensity.WT_Rep2	Intensity.WT_Rep3	Mean_wt	Median_wt	logFC	Pvalue_limma	MLP Score	Significant_in_Protein_Limma_Results
784.425	P80317	T-complex protein 1 subunit zeta	Cct6a	46082000	25848000	9856200	27262066.6666667	25848000	-1.27073249938513	0.269126987504911	1	0
814.486	P60843	Eukaryotic initiation factor 4A-I	Eif4a1	20336000	12333000	6689700	13119566.6666667	12333000	-1.27656108262471	0.28530067456017	1	0
845.365	P15265	Sperm mitochondrial-associated cysteine-rich protein	Smcp	14211000	26939000	3790600	14980200	14211000	-2.77215150765818	0.0119778246060968	1	1
894.444	Q9DAN6	Gametocyte-specific factor 1	Gtsf1	13702000	9735200	3476900	8971366.66666667	9735200	-0.236437351795256	0.819637009951116	1	0
958.532	Q9D5A0	Sperm equatorial segment protein 1	Spesp1	9867800	6457800	1647600	5991066.66666667	6457800	-1.20621671023842	0.263617871303703	1	0
973.441	D3Z690	Izumo sperm-egg fusion protein 4	Izumo4	3656900	1469600	489610	1872036.66666667	1469600	-0.2813250976459	0.78741832284257	1	0
995.451	A3KGV1	Outer dense fiber protein 2	Odf2	32057000	15869000	4626300	17517433.3333333	15869000	-0.478312130062808	0.658165488209427	1	0
997.568	Q8CI43	Myosin light chain 6B	Myl6b	3008300	2414100	1028700	2150366.66666667	2414100	-0.514494784892276	0.616416383262262	1	0
1029.51	P52194	Calmegin	Clgn	50062000	34637000	10769000	31822666.6666667	34637000	-3.26812490395346	0.00798158207110172	1	0
1051.59	Q9D771	Transmembrane protein 206	Tmem206	7261300	4208200	1881300	4450266.66666667	4208200	-0.635397983750697	0.559178968110302	1	0
1126.68	Q9WUL7	ADP-ribosylation factor-like protein 3	Arl3	70088000	51725000	23726000	48513000	51725000	-0.184398492844606	0.857733125260422	1	0
1132.62	Q9D1E6	Tubulin-folding cofactor B	Tbcb	24519000	12819000	5141400	14159800	12819000	-1.88496219469886	0.0949259175913123	1	0
1176.59	P35487	Pyruvate dehydrogenase E1 component subunit alpha, testis-specific form, mitochondrial	Pdha2	42241000	33699000	10283000	28741000	33699000	-0.433806550604025	0.675517703036378	1	0
1196.57	P16460	Argininosuccinate synthase	Ass1	41693000	4131300	4703900	16842733.3333333	4703900	-3.08119302343244	0.00638266429307164	1	1
1212.61	Q8BHG1	Nardilysin	Nrd1	11397000	12646000	4992900	9678633.33333333	11397000	-1.64054221048775	0.131047645146459	1	0
1231.63	Q9JJL0		Tsga8	15221000	5652700	2570600	7814766.66666667	5652700	-1.8304886717252	0.0874519144170707	1	1
1251.62	Q91YW3	DnaJ homolog subfamily C member 3	Dnajc3	9737000	3171200	0	4302733.33333333	3171200	-1.01962228070445	0.339496186093535	1	0
1267.63	P47911	60S ribosomal protein L6	Rpl6	27649000	7737600	4632200	13339600	7737600	-1.16626192384496	0.312760009156655	1	0
1296.57	Q60718	Disintegrin and metalloproteinase domain-containing protein 2	Adam2	23364000	12322000	4159400	13281800	12322000	-0.396653463669721	0.704626853751082	1	0
1316.7	Q9DAP0	Leucine-rich repeat-containing protein 46	Lrrc46	10859000	2884100	1493900	5079000	2884100	-1.22799619369142	0.255258085119011	1	0
1336.65	Q9JJN4	Succinyl-CoA:3-ketoacid coenzyme A transferase 2B, mitochondrial;Succinyl-CoA:3-ketoacid coenzyme A transferase 2A, mitochondrial	Oxct2b;Oxct2a	97827000	85829000	26273000	69976333.3333333	85829000	-1.10162390690275	0.293902587134696	1	0
1352.61	P54775	26S protease regulatory subunit 6B	Psmc4	12700000	4073000	1512500	6095166.66666667	4073000	-0.276367349521739	0.804080010594449	1	0
1358.57	P48774	Glutathione S-transferase Mu 5	Gstm5	142660000	125340000	31050000	99683333.3333333	125340000	-0.434361616477503	0.677458365847902	1	0
1374.59	Q8BVN9	Protein maelstrom homolog	Mael	3063700	2672800	925040	2220513.33333333	2672800	-0.494017395018455	0.633348211855694	1	0
1385.8	P60122	RuvB-like 1	Ruvbl1	12825000	8002800	4433200	8420333.33333333	8002800	-2.23538562161091	0.0385987218693438	1	0
1416.83	Q9DAN1	Protein disulfide-isomerase-like protein of the testis	Pdilt	9463400	8584500	2762400	6936766.66666667	8584500	-1.83470875274469	0.0876190704535715	1	0
1423.72	Q8C5P7	Testis development-related protein	Tdrp	1594600	2401100	686130	1560610	1594600	-0.00341108241437546	0.997357173913654	1	0
1436.75	Q60662	A-kinase anchor protein 4	Akap4	307540000	54535000	15362000	125812333.333333	54535000	-0.491752881598173	0.662344980460302	1	0
1467.8	Q9WUA2	Phenylalanine--tRNA ligase beta subunit	Farsb	17815000	13310000	4344500	11823166.6666667	13310000	-0.161685936849034	0.87522135835507	1	0
1474.62	Q8K0C4	Lanosterol 14-alpha demethylase	Cyp51a1	7387400	1974900	740320	3367540	1974900	-0.694096757588543	0.512293947756255	1	0
1489.79	Q9D824	Pre-mRNA 3-end-processing factor FIP1	Fip1l1	5744800	3152300	1423000	3440033.33333333	3152300	-0.734664712276879	0.480018627181557	1	0
1505.77	Q8R0Y6	Cytosolic 10-formyltetrahydrofolate dehydrogenase	Aldh1l1	12471000	7107600	2642700	7407100	7107600	-1.05785540808566	0.320723506420941	1	0
1625.91	Q9DAJ5	Dynein light chain roadblock-type 2	Dynlrb2	12405000	5849400	2585000	6946466.66666667	5849400	-0.904562616381481	0.395646545428005	1	0
1661.82	G5E8A8		Tekt5	7983700	4699100	1487900	4723566.66666667	4699100	-0.663003725485433	0.529909808544266	1	0
1893.97	Q6NWV3	Intraflagellar transport protein 122 homolog	Ift122	9646600	4162800	1795400	5201600	4162800	-0.239268524024712	0.818205714779311	1	0
1916.93	P47962	60S ribosomal protein L5	Rpl5	15982000	5842400	2575500	8133300	5842400	-0.51800506051214	0.62707018210744	1	0
2119.1	Q8BGQ7	Alanine--tRNA ligase, cytoplasmic	Aars	0	2177700	1355400	1177700	1355400	-0.639036446575622	0.530092184710955	1	0
2134.05	Q8R0Y6	Cytosolic 10-formyltetrahydrofolate dehydrogenase	Aldh1l1	39053000	12006000	4364300	18474433.3333333	12006000	-0.495518478878778	0.638537738297457	1	0
2187.11	Q60676	Serine/threonine-protein phosphatase 5	Ppp5c	4738800	6620700	3438600	4932700	4738800	-1.20630640974567	0.264217743562021	1	0
2343.19	Q9D5A0	Sperm equatorial segment protein 1	Spesp1	15555000	12312000	5058200	10975066.6666667	12312000	-1.03987238652305	0.315950816457349	1	0
