# Supplementary material for: MALDI-IMS combined with shotgun proteomics identify and localize new factors in male infertility
Source: Life Sci Alliance. 2021 Jan 6;4(3):e202000672. doi: 10.26508/lsa.202000672 (PMC7812314; doi:10.26508/lsa.202000672)
Supplement: Supplementary file 8 [file LSA-2020-00672TableS8.xlsx]

## Sheet: Sheet 1
Mass	Uniprot	ProteinNames	Symbol	Intensity_AROM_Rep1	Intensity_AROM_Rep2	Intensity_AROM_Rep3	Mean_arom	Median_arom	logFC	Pvalue_limma	MLPScore	Significant_In_Protein_Limma
763.508	Q62000	Mimecan	Ogn	4198700	5717900	18479000	9465200	5717900	3.834167	0.0005103048	1	1
821.416	Q99LC5	Electron transfer flavoprotein subunit alpha, mitochondrial	Etfa	21802000	15852000	36396000	24683333	21802000	1.71098	0.100777	1	0
822.509	P08003	Protein disulfide-isomerase A4	Pdia4	12653000	6127300	13390000	10723433	12653000	1.222151	0.2414102	1	0
836.452	P54071	Isocitrate dehydrogenase [NADP], mitochondrial	Idh2	8967700	8805400	16287000	11353367	8967700	2.236107	0.03216824	1	0
843.531	A6H584	Collagen alpha-5(VI) chain;Collagen alpha-6(VI) chain	Col6a5;Col6a6	4405500	28197000	39637000	24079833	28197000	4.186918	0.0004094641	1	0
857.546	Q61578	NADPH:adrenodoxin oxidoreductase, mitochondrial	Fdxr	15051000	14187000	34895000	21377667	15051000	2.277749	0.03117444	1	0
879.458	Q9JK53	Prolargin	Prelp	47271000	45215000	83498000	58661333.3333333	47271000	5.19669763680206	7.21457902472366e-06	1	1
881.473	Q02788	Collagen alpha-2(VI) chain	Col6a2	0	41832000	76211000	39347667	41832000	2.414531	0.05935441	1	1
901.511	P48036	Annexin A5	Anxa5	43433000	5494800	16201000	21709600	16201000	3.91110932046526	0.00214816783707176	1	0
915.552	Q60847	Collagen alpha-1(XII) chain	Col12a1	3096700	20267000	37793000	20385567	20267000	3.754196	0.001037635	1	1
923.572	P40336	Vacuolar protein sorting-associated protein 26A;Vacuolar protein sorting-associated protein 26B	Vps26a;Vps26b	0	2515000	3524300	2013100	2515000	0.7896916	0.4439862	1	0
929.542	Q60847	Collagen alpha-1(XII) chain	Col12a1	2182900	9409000	29047000	13546300	9409000	3.323116	0.003106521	1	1
931.529	Q02053	Ubiquitin-like modifier-activating enzyme 1;Ubiquitin-like modifier-activating enzyme 1 Y	Uba1;Uba1y	56804000	29308000	59794000	48635333	56804000	1.317432	0.2024669	1	0
943.598	P06151	L-lactate dehydrogenase A chain	Ldha	62163000	35980000	64996000	54379667	62163000	0.7298125	0.480869	1	0
953.604	P70696	Histone H2B type 1-P;Histone H2B type 1-K;Histone H2B type 1-C/E/G;Histone H2B type 2-B;Histone H2B type 1-H;Histone H2B type 1-B;Histone H2B type 1-M;Histone H2B type 1-F/J/L;Histone H2B type 1-A;Histone H2B type 3-A;Histone H2B type 3-B;Histone H2B type 2-E	Hist1h2bp;Hist1h2bk;Hist1h2bc;Hist2h2bb;Hist1h2bh;Hist1h2bb;Hist1h2bm;Hist1h2bf;Hist1h2ba;Hist3h2ba;Hist3h2bb;Hist2h2be	1576800000	875520000	1571400000	1341240000	1571400000	1.266062	0.2276973	1	0
967.522	Q8BTM8	Filamin-A	Flna	252600	2681800	16680000	6538133	2681800	2.597354	0.02783315	1	0
971.589	P61226	Ras-related protein Rap-2b;Ras-related protein Rap-2c	Rap2b;Rap2c	8000200	5668900	8454300	7374467	8000200	1.996589	0.05594908	1	0
985.605	Q9QZQ8	Core histone macro-H2A.1	H2afy	14284000	5228900	15375000	11629300	14284000	1.956738	0.06763709	1	0
1028.64	Q99KJ8	Dynactin subunit 2	Dctn2	8111700	6302900	3888800	6101133	6302900	1.73832	0.0982233	1	0
1071.62	P63087	Serine/threonine-protein phosphatase PP1-gamma catalytic subunit	Ppp1cc	36523000	14055000	35898000	28825333	35898000	2.144105	0.06523064	1	0
1143.67	Q6ZWV7	60S ribosomal protein L35	Rpl35	10392000	9175200	12435000	10667400	10392000	0.8074304	0.4366874	1	0
1166.7	P00405	Cytochrome c oxidase subunit 2	Mtco2	146580000	53481000	129860000	109973667	129860000	0.9239657	0.3763956	1	0
1334.75	Q9QWR8	Alpha-N-acetylgalactosaminidase	Naga	73860000	15856000	9074200	32930067	15856000	1.523687	0.1770206	1	0
1457.84	P56480	ATP synthase subunit beta, mitochondrial	Atp5b	571940000	99627000	135630000	269065667	135630000	1.058478	0.3344246	1	0
1848.98	Q04447	Creatine kinase B-type	Ckb	307580000	83064000	38481000	143041667	83064000	3.013594	0.008835047	1	1
1877.9	Q62318	Transcription intermediary factor 1-beta	Trim28	36231000	8483500	36171000	26961833	36171000	2.603792	0.02102685	1	0
1902	Q8K0E8	Fibrinogen beta chain;Fibrinopeptide B;Fibrinogen beta chain	Fgb	36908000	19158000	34275000	30113667	34275000	2.677302	0.01195628	1	0
2045.16	Q5SUR0	Phosphoribosylformylglycinamidine synthase	Pfas	36891000	3987500	3158200	14678900	3987500	2.120224	0.09937733	1	0
2064.06	P30416	Peptidyl-prolyl cis-trans isomerase FKBP4;Peptidyl-prolyl cis-trans isomerase FKBP4, N-terminally processed	Fkbp4	33947000	15407000	24118000	24490666.6666667	24118000	0.696777643903517	0.499364848825627	1	0
